# Supplementary material for: N-heterocyclic carbene-catalyzed direct enantioselective synthesis of dihydroisoxazolo[5,4-b]pyridin-6-ones
Source: Royal Society of Chemistry journal article supplement (doi:10.1039/d2qo01736a), 2023-01-01
Supplement: d2qo01736a1.pdf [file d2qo01736a1.pdf]

## Supplementary Information

### N-Heterocyclic Carbene-Catalyzed Direct Enantioselective Synthesis of dihydroisoxazolo[5,4-*b*]pyridin-6-ones

Xiaoxia Huang, Yarui Li, Jieyin He, Shiyong Peng, Jian Wang\* and Ming Lang\*

School of Biotechnology and Health Sciences, Wuyi University, Jiangmen 529020, People's Republic of China.

E-mail: [wangjian2012@tsinghua.edu.cn](mailto:wangjian2012@tsinghua.edu.cn); [langm2019@163.com](mailto:langm2019@163.com).

#### Table of contents

|                                                                                      |     |
|--------------------------------------------------------------------------------------|-----|
| 1. General Information-----                                                          | S2  |
| 2. Experiment Details-----                                                           | S3  |
| 2.1 General experimental procedure for the synthesis of $\alpha$ -bromoaldehydes (1) |     |
| 2.2 General experimental procedure for the synthesis of 5-aminoisoxazoles (2)        |     |
| 2.3 General experimental procedure for the synthesis of products 3 and 4             |     |
| 2.4 Procedure for the gram-scale synthesis of 3a                                     |     |
| 2.5 Procedure for the synthesis of 5, 6 and 7                                        |     |
| 3. Proposed Mechanism-----                                                           | S7  |
| 4. Analytical Data-----                                                              | S8  |
| 5. X-Ray Diffraction Data of 3a-----                                                 |     |
| S36                                                                                  |     |
| 6. References-----                                                                   | S38 |
| 7. Copies of NMR Spectra-----                                                        | S39 |
| 8. HPLC Chromatograms-----                                                           | S89 |

## 1. General Information

Unless otherwise noted, all the materials and solvents were purchased from commercial suppliers and used without further purification. Reactions were conducted in dry glassware using anhydrous solvent. Thin-layer chromatography (TLC) was conducted on plates (GF254) supplied by Qingdao Weinaxipu New Material co., Ltd. and visualized using a combination of UV, iodine and Phosphomolybdic acid staining. Column chromatography was performed with silica gel (200-300 mesh). Melting points were determined with an SGW X-4B melting point apparatus and are uncorrected. NMR spectra were recorded on a Bruker Ascend™ 500 spectrometer for  $^1\text{H}$  at 500 MHz,  $^{13}\text{C}$  NMR at 126 MHz,  $^{19}\text{F}$  NMR at 471 MHz using TMS as internal standard. The peaks were internally referenced to residual undeuterated chloroform in  $\text{CDCl}_3$  (7.26 ppm for  $^1\text{H}$  NMR, 77.16 ppm for  $^{13}\text{C}$  NMR) or DMSO in  $\text{DMSO}-d_6$  (2.50 ppm for  $^1\text{H}$  NMR, 39.52 ppm for  $^{13}\text{C}$  NMR). The following abbreviations were used to explain multiplicities: s = singlet, d = doublet, t = triplet, q = quartet, dd = doublet of doublet, m = multiplet or unresolved. Coupling constants were reported in Hertz (Hz). High resolution mass spectroscopy data of the products were collected on a Thermo Scientific Q Exactive UHMR (Ultra-High Mass Range) Hybrid Quadrupole-Orbitrap™ mass spectrometer using ESI ionization. The *ee* values were determined on Waters 1525 HPLC using CHIRALPAK column with hexane and 2-propanol as eluent, Wavelength = 254 nm.

## 2. Experiment Details

### 2.1 General experimental procedure for the synthesis of $\alpha$ -bromoenals (**1**)

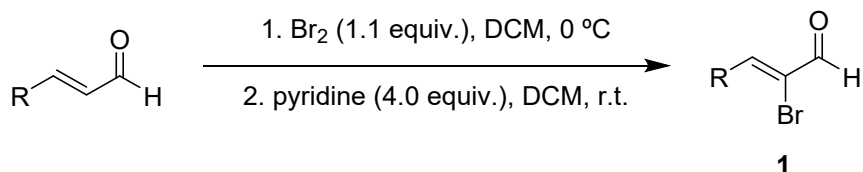

All  $\alpha$ -bromoenals were prepared from the corresponding enals according to procedures previously reported by our group.<sup>1</sup>

To a solution of enals (20 mmol, 1.0 equiv.) in DCM (40 mL) at  $0\text{ }^\circ\text{C}$  was added  $\text{Br}_2$  (22 mmol, 1.1 equiv.) dropwise, the reaction mixture was stirred at  $0\text{ }^\circ\text{C}$  for 30 min. Pyridine (80 mmol, 4.0 equiv.) was added dropwise and stirred at room temperature for another 2h. The reaction mixture was washed with 10%  $\text{Na}_2\text{S}_2\text{O}_3$  (aq.) solution (50 mL) and water (50 mL). The organic layer was dried with anhydrous  $\text{Na}_2\text{SO}_4$ , concentrated and purified by column chromatography to give compound **1** as a white solid or colorless oil.

### 2.2 General experimental procedure for the synthesis of 5-aminoisoxazoles (**2**)

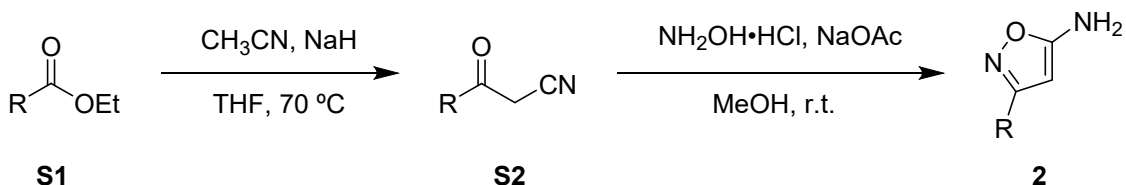

All 5-aminoisoxazoles were prepared from commercially available esters in two steps according to literature procedures.<sup>2</sup>

**Step 1:** To a suspension of  $\text{NaH}$  (20 mmol) in anhydrous  $\text{THF}$  (20 mL) at  $0\text{ }^\circ\text{C}$  was added acetonitrile (30 mmol) and ester **S1** (10 mmol), the reaction mixture was stirred at  $70\text{ }^\circ\text{C}$  for 3-5h. After completion of the reaction, the reaction mixture was cooled to  $0\text{ }^\circ\text{C}$ , pH of the solution was adjusted to neutral by 1M  $\text{HCl}$ . The mixture was extracted with ethyl acetate, dried with anhydrous  $\text{Na}_2\text{SO}_4$ , and concentrated under reduced pressure. Purified by column chromatography on silica gel to afford compound **S2** as a white solid or colorless oil.

**Step 2:** A mixture of  $\text{NH}_2\text{OH}\cdot\text{HCl}$  (24 mmol) and  $\text{NaOAc}$  (24 mmol) in  $\text{MeOH}$  (20 mL) was stirred at room temperature for 1h. **S2** (8 mmol) was added to the reaction mixture, and stirred at room temperature until completion of the reaction. Water (30 mL) was added slowly to





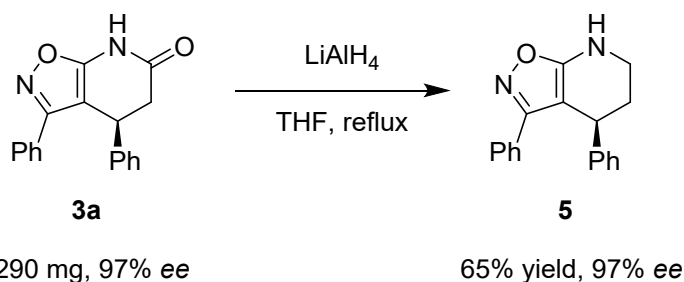

To a suspension of  $\text{LiAlH}_4$  (76 mg, 2 mmol) in anhydrous THF (20 mL) under argon atmosphere was added a solution of **3a** (290 mg, 1 mmol) in anhydrous THF (5 mL). The reaction mixture was stirred under reflux for 8h. After completion of the reaction, quenched by water and extracted by ethyl acetate (50 mL $\times$ 2), The combined organic layer was washed with brine, dried over anhydrous  $\text{Na}_2\text{SO}_4$ , concentrated and purified by column chromatography to give the product **5** (65% yield, 97% ee) as a white solid.

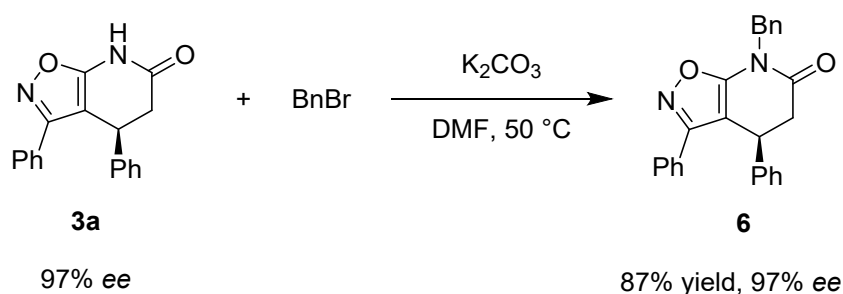

To a solution of **3a** (0.2 mmol) in DMF (1.0 mL) was added  $\text{K}_2\text{CO}_3$  (1.0 mmol) and BnBr (1.0 mmol), the reaction mixture was stirred at 50 °C for 4h. After completion of the reaction, cooled to room temperature, water (10 mL) was added and extracted ethyl acetate, the organic layer was dried with anhydrous  $\text{Na}_2\text{SO}_4$ , concentrated and purified by column chromatography to afford product **6** (87% yield, 97% ee) as a colorless oil.

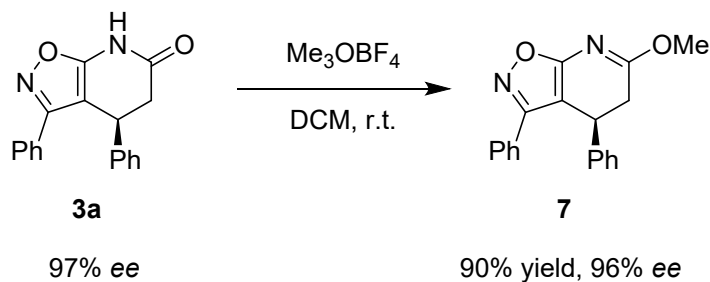

To a solution of **3a** (0.22 mmol) in anhydrous DCM (5 mL) under argon atmosphere was added trimethyloxonium tetrafluoroborate (0.2 mmol), the resulting reaction mixture was stirred at

room temperature for 8h. After completion of the reaction, 10% NaHCO<sub>3</sub> (aq.) solution (10 mL) was added and the mixture was extracted with DCM. The organic layer was dried over anhydrous Na<sub>2</sub>SO<sub>4</sub>, concentrated and purified by column chromatography to afford product **7** (90% yield, 96% *ee*) as a colorless oil.

### 3. Proposed Mechanism

The nucleophilic addition of chiral NHC **C'** generated from precatalyst **C** under basic conditions to the  $\alpha$ -bromoaldehyde **1a** gives Breslow intermediate, which was tautomerized to bromoketone. The elimination of a bromide generates the crucial  $\alpha,\beta$ -unsaturated acyl azolium intermediate **I**. 1,2-Addition of **2a** to intermediate **I** gives hemiaminal **II**, which undergoes aza-Claisen rearrangement and tautomerization to afford intermediate **IV**. Subsequent intramolecular lactamization leading to the formation of product **3a** with the release of NHC catalyst.

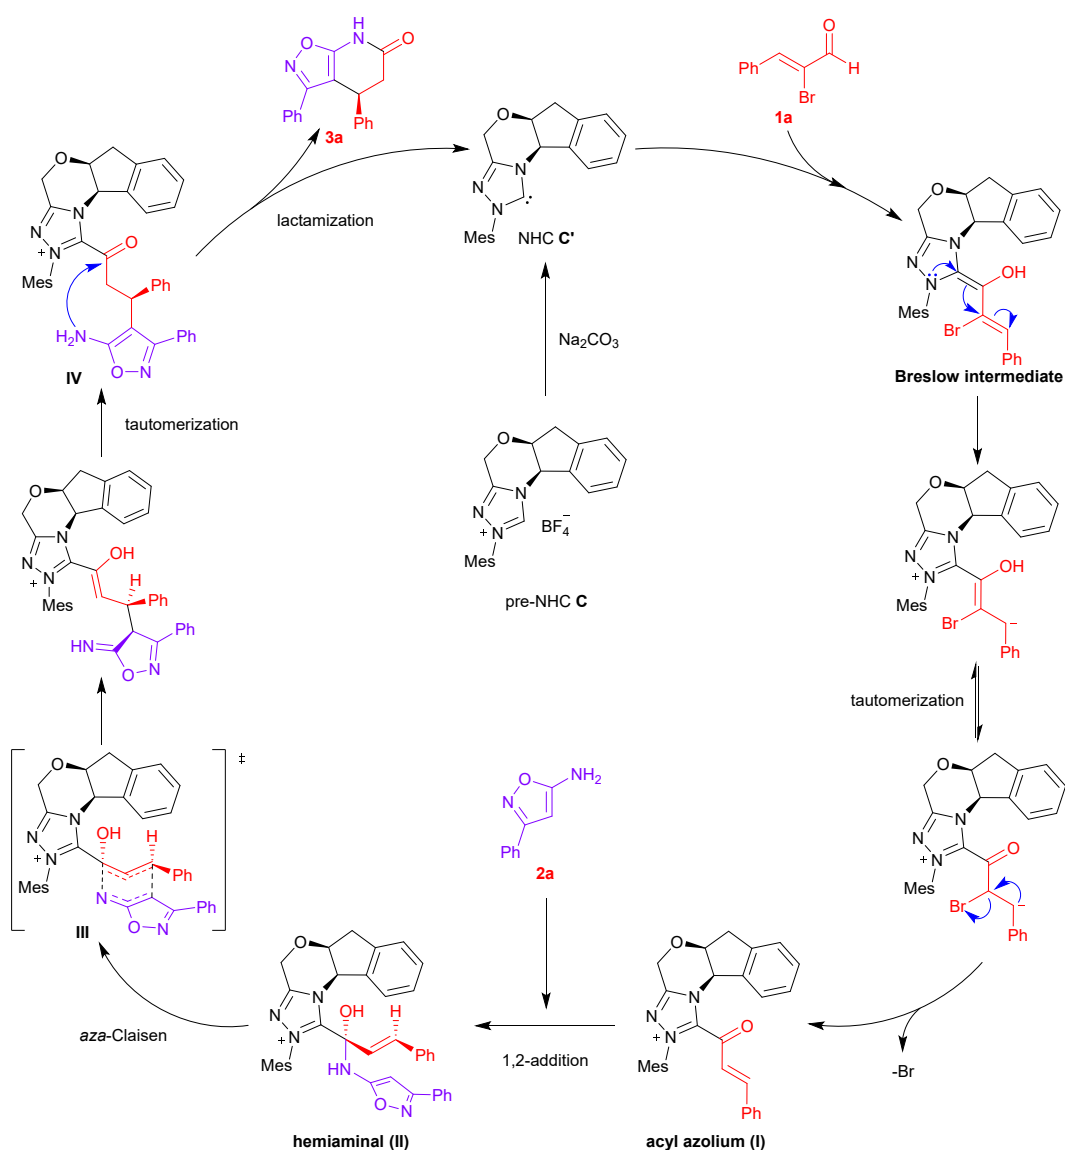

## 4. Analytical Data

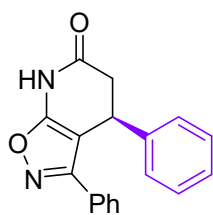

**3a**

White solid, 99% yield, 99% *ee*.

**<sup>1</sup>H NMR** (500 MHz, DMSO-*d*<sub>6</sub>) δ 11.86 (s, 1H), 7.58 – 7.52 (m, 2H), 7.46 – 7.36 (m, 3H), 7.33 – 7.27 (m, 2H), 7.25 – 7.18 (m, 1H), 7.17 – 7.12 (m, 2H), 4.52 (dd, *J* = 8.1, 2.3 Hz, 1H), 3.30 (dd, *J* = 16.2, 8.1 Hz, 1H), 2.57 (dd, *J* = 16.2, 2.3 Hz, 1H).

**<sup>13</sup>C NMR** (126 MHz, DMSO-*d*<sub>6</sub>) δ 169.0, 164.1, 159.6, 142.4, 130.1, 129.1, 129.0, 128.5, 127.2, 127.0, 126.5, 92.7, 40.5, 33.0.

**HRMS** (ESI): exact mass calculated for C<sub>18</sub>H<sub>14</sub>N<sub>2</sub>O<sub>2</sub>Na [M + Na]<sup>+</sup> 313.0956, found 313.0945.

**m.p.** = 178-180 °C.

The *ee* value was determined by HPLC analysis on a Chiralcel IG column (*n*-hexane/isopropanol = 90/10, flow rate = 1.0 mL/min, λ = 254 nm, *t*<sub>R</sub>(major) = 18.110 min, *t*<sub>R</sub>(minor) = 20.137 min.)

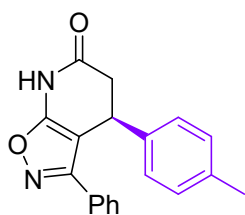

**3b**

White solid, 99% yield, 97% *ee*.

**<sup>1</sup>H NMR** (500 MHz, CDCl<sub>3</sub>) δ 9.01 (s, 1H), 7.53 – 7.47 (m, 2H), 7.41 – 7.36 (m, 1H), 7.36 – 7.30 (m, 2H), 7.10 (d, *J* = 7.9 Hz, 2H), 7.03 (d, *J* = 7.9 Hz, 2H), 4.31 (dd, *J* = 8.1, 2.3 Hz, 1H), 3.17 (dd, *J* = 16.3, 8.1 Hz, 1H), 2.87 (dd, *J* = 16.3, 2.3 Hz, 1H), 2.31 (s, 3H).

**<sup>13</sup>C NMR** (126 MHz, CDCl<sub>3</sub>) δ 169.5, 162.3, 160.9, 138.2, 137.5, 130.2, 130.1, 129.0, 128.6, 127.7, 126.7, 94.1, 41.0, 33.7, 21.2.

**HRMS** (ESI): exact mass calculated for C<sub>19</sub>H<sub>17</sub>N<sub>2</sub>O<sub>2</sub> [M + H]<sup>+</sup> 305.1287, found 305.1286.

**m.p.** = 165-167 °C.

The *ee* value was determined by HPLC analysis on a Chiralcel IG column (*n*-hexane/isopropanol = 90/10, flow rate = 1.0 mL/min,  $\lambda$  = 254 nm,  $t_R$ (major) = 15.610 min,  $t_R$ (minor) = 18.846 min.)

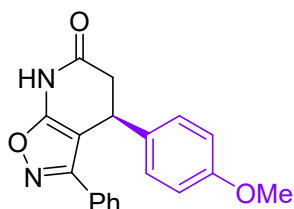

**3c**

White solid, 86% yield, 97% *ee*.

**<sup>1</sup>H NMR** (500 MHz, CDCl<sub>3</sub>)  $\delta$  8.98 (s, 1H), 7.52 – 7.47 (m, 2H), 7.42 – 7.36 (m, 1H), 7.36 – 7.31 (m, 2H), 7.09 – 7.04 (m, 2H), 6.86 – 6.80 (m, 2H), 4.31 (dd, *J* = 8.0, 2.4 Hz, 1H), 3.77 (s, 3H), 3.16 (dd, *J* = 16.3, 8.0 Hz, 1H), 2.86 (dd, *J* = 16.3, 2.4 Hz, 1H).

**<sup>13</sup>C NMR** (126 MHz, CDCl<sub>3</sub>)  $\delta$  169.4, 162.2, 160.9, 159.1, 133.3, 130.2, 129.0, 128.5, 127.9, 127.7, 114.8, 94.3, 55.4, 41.1, 33.4.

**HRMS** (ESI): exact mass calculated for C<sub>19</sub>H<sub>17</sub>N<sub>2</sub>O<sub>3</sub> [M + H]<sup>+</sup> 321.1236, found 321.1234.

**m.p.** = 143-145 °C.

The *ee* value was determined by HPLC analysis on a Chiralcel IG column (*n*-hexane/isopropanol = 80/20, flow rate = 1.0 mL/min,  $\lambda$  = 254 nm,  $t_R$ (major) = 11.300 min,  $t_R$ (minor) = 13.271 min.)

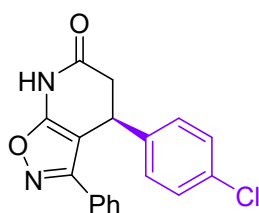

**3d**

White solid, 99% yield, 98% *ee*.

**<sup>1</sup>H NMR** (500 MHz, CDCl<sub>3</sub>) δ 9.40 (s, 1H), 7.52 – 7.43 (m, 2H), 7.42 – 7.37 (m, 1H), 7.37 – 7.31 (m, 2H), 7.30 – 7.24 (m, 2H), 7.11 – 7.06 (m, 2H), 4.34 (dd, *J* = 8.1, 2.6 Hz, 1H), 3.20 (dd, *J* = 16.4, 8.1 Hz, 1H), 2.85 (dd, *J* = 16.4, 2.6 Hz, 1H).

**<sup>13</sup>C NMR** (126 MHz, CDCl<sub>3</sub>) δ 169.3, 162.4, 160.9, 139.8, 133.7, 130.3, 129.6, 129.0, 128.31, 128.25, 127.6, 93.5, 40.7, 33.6.

**HRMS** (ESI): exact mass calculated for C<sub>18</sub>H<sub>14</sub>ClN<sub>2</sub>O<sub>2</sub> [M + H]<sup>+</sup> 325.0747, found 325.0742.

**m.p.** = 195-197 °C.

The *ee* value was determined by HPLC analysis on a Chiralcel IG column (*n*-hexane/isopropanol = 80/20, flow rate = 1.0 mL/min, λ = 254 nm, t<sub>R</sub>(major) = 8.145 min, t<sub>R</sub>(minor) = 9.565 min.)

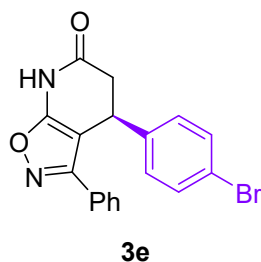

White solid, 99% yield, 98% *ee*.

**<sup>1</sup>H NMR** (500 MHz, CDCl<sub>3</sub>) δ 9.07 (s, 1H), 7.50 – 7.38 (m, 5H), 7.37 – 7.31 (m, 2H), 7.03 (d, *J* = 8.4 Hz, 2H), 4.33 (dd, *J* = 8.1, 2.6 Hz, 1H), 3.19 (dd, *J* = 16.4, 8.1 Hz, 1H), 2.85 (dd, *J* = 16.4, 2.5 Hz, 1H).

**<sup>13</sup>C NMR** (126 MHz, CDCl<sub>3</sub>) δ 169.0, 162.4, 160.9, 140.3, 132.6, 130.4, 129.1, 128.6, 128.3, 127.6, 121.8, 93.4, 40.7, 33.7.

**HRMS** (ESI): exact mass calculated for C<sub>18</sub>H<sub>14</sub>BrN<sub>2</sub>O<sub>2</sub> [M + H]<sup>+</sup> 369.0241, found 369.0234.

**m.p.** = 194-196 °C.

The *ee* value was determined by HPLC analysis on a Chiralcel IG column (*n*-hexane/isopropanol = 80/20, flow rate = 1.0 mL/min, λ = 254 nm, t<sub>R</sub>(major) = 8.445 min, t<sub>R</sub>(minor) = 10.020 min.)

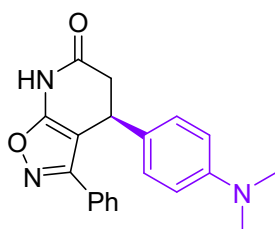

**3f**

White solid, 52% yield, 96% *ee*.

**<sup>1</sup>H NMR** (500 MHz, CDCl<sub>3</sub>) δ 8.70 (s, 1H), 7.54 (d, *J* = 6.9 Hz, 2H), 7.41 – 7.30 (m, 3H), 7.00 (d, *J* = 8.7 Hz, 2H), 6.65 (d, *J* = 8.6 Hz, 2H), 4.26 (dd, *J* = 7.9, 2.2 Hz, 1H), 3.13 (dd, *J* = 16.2, 7.9 Hz, 1H), 2.91 (s, 6H), 2.86 (dd, *J* = 16.2, 2.2 Hz, 1H).

**<sup>13</sup>C NMR** (126 MHz, CDCl<sub>3</sub>) δ 169.5, 162.1, 161.0, 150.0, 130.1, 128.9, 128.7, 127.7, 127.5, 113.3, 94.7, 41.2, 40.7, 33.2.

**HRMS** (ESI): exact mass calculated for C<sub>20</sub>H<sub>20</sub>N<sub>3</sub>O<sub>2</sub> [M + H]<sup>+</sup> 334.1553, found 334.1551.

**m.p.** = 182-184 °C.

The *ee* value was determined by HPLC analysis on a Chiralcel IG column (*n*-hexane/isopropanol = 80/20, flow rate = 1.0 mL/min, λ = 254 nm, t<sub>R</sub>(major) = 12.019 min, t<sub>R</sub>(minor) = 13.952 min.)

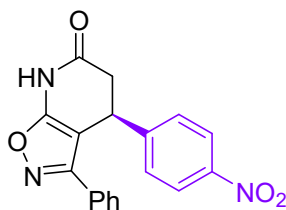

**3g**

White solid, 54% yield, 97% *ee*.

**<sup>1</sup>H NMR** (500 MHz, CDCl<sub>3</sub>) δ 8.99 (s, 1H), 8.20 – 8.14 (m, 2H), 7.47 – 7.37 (m, 3H), 7.34 (dd, *J* = 8.1, 6.0 Hz, 4H), 4.50 (dd, *J* = 8.1, 3.0 Hz, 1H), 3.27 (dd, *J* = 16.5, 8.2 Hz, 1H), 2.88 (dd, *J* = 16.5, 3.0 Hz, 1H).

**<sup>13</sup>C NMR** (126 MHz, CDCl<sub>3</sub>) δ 168.3, 162.5, 160.9, 148.5, 147.6, 130.6, 129.1, 128.1, 127.9, 127.5, 124.8, 92.6, 40.3, 34.2.

**HRMS** (ESI): exact mass calculated for C<sub>18</sub>H<sub>14</sub>N<sub>3</sub>O<sub>4</sub> [M + H]<sup>+</sup> 336.0987, found 336.0980.

**m.p.** = 186-188 °C.

The *ee* value was determined by HPLC analysis on a Chiralcel IG column (*n*-hexane/isopropanol = 80/20, flow rate = 1.0 mL/min,  $\lambda$  = 254 nm,  $t_R$ (major) = 14.888 min,  $t_R$ (minor) = 21.451 min.)

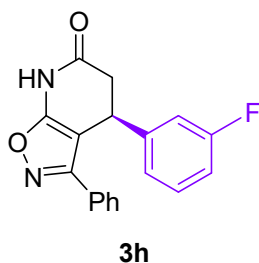

White solid, 91% yield, 98% *ee*.

**<sup>1</sup>H NMR** (500 MHz, CDCl<sub>3</sub>)  $\delta$  8.95 (s, 1H), 7.48 – 7.43 (m, 2H), 7.42 – 7.35 (m, 1H), 7.33 (dd,  $J$  = 8.4, 6.7 Hz, 2H), 7.26 (d,  $J$  = 7.3 Hz, 1H), 7.14 – 7.06 (m, 1H), 7.03 (t,  $J$  = 7.5 Hz, 1H), 7.00 – 6.94 (m, 1H), 4.69 (dd,  $J$  = 8.3, 2.5 Hz, 1H), 3.19 (dd,  $J$  = 16.6, 8.2 Hz, 1H), 2.91 (dd,  $J$  = 16.6, 2.6 Hz, 1H).

**<sup>13</sup>C NMR** (126 MHz, CDCl<sub>3</sub>)  $\delta$  169.1, 162.7, 160.8, 160.3 (d,  $J$  = 247.0 Hz), 130.3, 129.7 (d,  $J$  = 8.3 Hz), 129.0, 128.33, 128.3 (d,  $J$  = 3.7 Hz), 127.9 (d,  $J$  = 13.9 Hz), 127.5, 124.9 (d,  $J$  = 3.6 Hz), 116.2 (d,  $J$  = 21.7 Hz), 92.4, 39.2, 27.8 (d,  $J$  = 3.3 Hz).

**<sup>19</sup>F NMR** (471 MHz, CDCl<sub>3</sub>)  $\delta$  -118.2.

**HRMS** (ESI): exact mass calculated for C<sub>18</sub>H<sub>14</sub>FN<sub>2</sub>O<sub>2</sub> [M + H]<sup>+</sup> 309.1042, found 309.1035.

**m.p.** = 195-197 °C.

The *ee* value was determined by HPLC analysis on a Chiralcel IC column (*n*-hexane/isopropanol = 80/20, flow rate = 1.0 mL/min,  $\lambda$  = 254 nm,  $t_R$ (major) = 25.457 min,  $t_R$ (minor) = 28.930 min.)

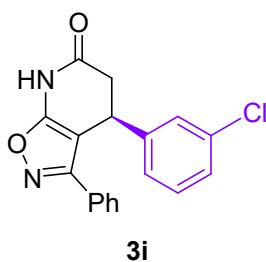

White solid, 94% yield, 99% *ee*.



**<sup>1</sup>H NMR** (500 MHz, CDCl<sub>3</sub>) δ 9.03 (s, 1H), 7.49 – 7.43 (m, 2H), 7.43 – 7.37 (m, 1H), 7.37 – 7.31 (m, 2H), 7.26 – 7.20 (m, 2H), 7.15 – 7.11 (m, 1H), 7.06 – 7.00 (m, 1H), 4.34 (dd, *J* = 8.1, 2.7 Hz, 1H), 3.20 (dd, *J* = 16.5, 8.1 Hz, 1H), 2.87 (dd, *J* = 16.5, 2.6 Hz, 1H).

**<sup>13</sup>C NMR** (126 MHz, CDCl<sub>3</sub>) δ 168.9, 162.4, 160.9, 143.3, 135.3, 130.8, 130.3, 129.0, 128.3, 128.2, 127.6, 127.1, 125.1, 93.2, 40.7, 33.9.

**HRMS** (ESI): exact mass calculated for C<sub>18</sub>H<sub>14</sub>ClN<sub>2</sub>O<sub>2</sub> [M + H]<sup>+</sup> 325.0747, found 325.0741.

**m.p.** = 201-203 °C.

The *ee* value was determined by HPLC analysis on a Chiralcel IB column (*n*-hexane/isopropanol = 80/20, flow rate = 1.0 mL/min, λ = 254 nm, t<sub>R</sub>(major) = 9.321 min, t<sub>R</sub>(minor) = 11.959 min.)

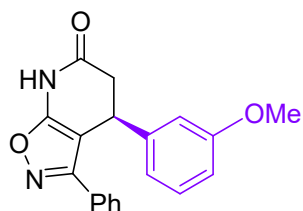

**3j**

White solid, 99% yield, 98% *ee*.

**<sup>1</sup>H NMR** (500 MHz, CDCl<sub>3</sub>) δ 8.73 (s, 1H), 7.53 – 7.46 (m, 2H), 7.42 – 7.35 (m, 1H), 7.34 (dd, *J* = 8.2, 6.4 Hz, 2H), 7.23 (t, *J* = 7.9 Hz, 1H), 6.78 (dd, *J* = 7.9, 2.0 Hz, 1H), 6.74 (d, *J* = 7.4 Hz, 1H), 6.66 (t, *J* = 2.2 Hz, 1H), 4.32 (dd, *J* = 8.1, 2.5 Hz, 1H), 3.73 (s, 3H), 3.18 (dd, *J* = 16.4, 8.1 Hz, 1H), 2.89 (dd, *J* = 16.4, 2.5 Hz, 1H).

**<sup>13</sup>C NMR** (126 MHz, CDCl<sub>3</sub>) δ 169.1, 162.3, 161.0, 160.3, 142.9, 130.5, 130.2, 129.0, 128.5, 127.7, 119.1, 113.0, 112.7, 93.9, 55.3, 40.8, 34.1.

**HRMS** (ESI): exact mass calculated for C<sub>19</sub>H<sub>17</sub>N<sub>2</sub>O<sub>3</sub> [M + H]<sup>+</sup> 321.1234, found 321.1230.

**m.p.** = 161-163 °C.

The *ee* value was determined by HPLC analysis on a Chiralcel IC column (*n*-hexane/isopropanol = 70/30, flow rate = 1.0 mL/min, λ = 254 nm, t<sub>R</sub>(major) = 18.492 min, t<sub>R</sub>(minor) = 22.455 min.)

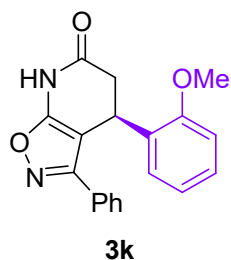

White solid, 64% yield, 96% *ee*.

**<sup>1</sup>H NMR** (500 MHz, CDCl<sub>3</sub>) δ 8.75 (s, 1H), 7.49 – 7.42 (m, 2H), 7.40 – 7.34 (m, 1H), 7.34 – 7.29 (m, 2H), 7.25 – 7.20 (m, 1H), 6.93 – 6.87 (m, 2H), 6.85 – 6.79 (m, 1H), 4.65 (dd, *J* = 8.5, 2.2 Hz, 1H), 3.84 (s, 3H), 3.09 (dd, *J* = 16.6, 8.5 Hz, 1H), 2.90 (dd, *J* = 16.6, 2.1 Hz, 1H).

**<sup>13</sup>C NMR** (126 MHz, CDCl<sub>3</sub>) δ 170.0, 162.6, 161.0, 156.6, 130.0, 129.0, 128.9, 128.8, 128.7, 127.9, 127.7, 120.9, 110.9, 93.2, 55.3, 38.6, 28.8.

**HRMS** (ESI): exact mass calculated for C<sub>19</sub>H<sub>17</sub>N<sub>2</sub>O<sub>3</sub> [M + H]<sup>+</sup> 321.1236, found 321.1235.

**m.p.** = 90-92 °C.

The *ee* value was determined by HPLC analysis on a Chiralcel IH column (*n*-hexane/isopropanol = 80/20, flow rate = 1.0 mL/min, λ = 254 nm, t<sub>R</sub>(major) = 19.343 min, t<sub>R</sub>(minor) = 12.546 min.)

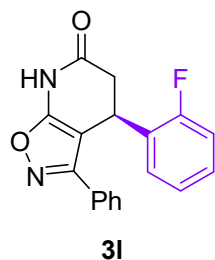

White solid, 92% yield, 93% *ee*.

**<sup>1</sup>H NMR** (500 MHz, CDCl<sub>3</sub>) δ 8.87 (s, 1H), 7.50 – 7.44 (m, 2H), 7.42 – 7.37 (m, 1H), 7.37 – 7.32 (m, 2H), 7.32 – 7.27 (m, 1H), 6.98 – 6.93 (m, 2H), 6.85 (dt, *J* = 9.6, 2.2 Hz, 1H), 4.36 (dd, *J* = 8.1, 2.6 Hz, 1H), 3.20 (dd, *J* = 16.4, 8.1 Hz, 1H), 2.88 (dd, *J* = 16.4, 2.6 Hz, 1H).

**<sup>13</sup>C NMR** (126 MHz, CDCl<sub>3</sub>) δ 168.8, 164.4, 162.4, 160.9, 143.8 (d, *J* = 6.5 Hz), 131.1 (d, *J* = 8.4 Hz), 130.3, 129.0, 128.3, 127.6, 122.5 (d, *J* = 2.8 Hz), 115.0 (d, *J* = 21.1 Hz), 114.0 (d, *J* = 22.0 Hz), 93.3, 40.7, 34.0 (d, *J* = 1.7 Hz).

**<sup>19</sup>F NMR** (471 MHz, CDCl<sub>3</sub>) δ -111.5.

**HRMS** (ESI): exact mass calculated for  $C_{18}H_{14}FN_2O_2$   $[M + H]^+$  309.1042, found 309.1035.

**m.p.** = 176-178 °C.

The *ee* value was determined by HPLC analysis on a Chiralcel IB column (*n*-hexane/isopropanol = 80/20, flow rate = 1.0 mL/min,  $\lambda$  = 254 nm,  $t_R$ (major) = 8.841 min,  $t_R$ (minor) = 11.098 min.)

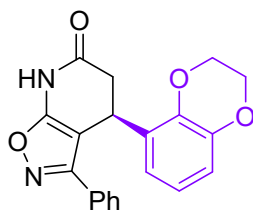

**3m**

White solid, 80% yield, 98% *ee*.

**$^1H$  NMR** (500 MHz,  $DMSO-d_6$ )  $\delta$  11.82 (s, 1H), 7.57 (dd,  $J$  = 7.6, 2.0 Hz, 2H), 7.48 – 7.39 (m, 3H), 6.80 – 6.74 (m, 1H), 6.60 – 6.54 (m, 2H), 4.40 (dd,  $J$  = 7.9, 2.1 Hz, 1H), 4.17 (s, 4H), 3.23 (dd,  $J$  = 16.1, 7.9 Hz, 1H), 2.53 (d,  $J$  = 2.1 Hz, 1H).

**$^{13}C$  NMR** (126 MHz,  $DMSO-d_6$ )  $\delta$  169.1, 164.0, 159.4, 143.5, 142.5, 135.3, 130.1, 129.0, 128.5, 127.0, 119.1, 117.5, 115.0, 93.0, 64.1, 63.9, 40.6, 32.2.

**HRMS** (ESI): exact mass calculated for  $C_{20}H_{17}N_2O_4$   $[M + H]^+$  349.1185, found 349.1183.

**m.p.** = 209-211 °C.

The *ee* value was determined by HPLC analysis on a Chiralcel IC column (*n*-hexane/isopropanol = 70/30, flow rate = 1.0 mL/min,  $\lambda$  = 254 nm,  $t_R$ (major) = 23.606 min,  $t_R$ (minor) = 27.257 min.)

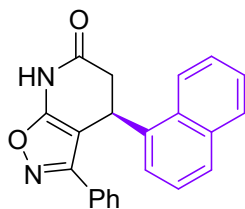

**3n**

White solid, 98% yield, 99% *ee*.

**<sup>1</sup>H NMR** (500 MHz, DMSO-*d*<sub>6</sub>) δ 11.90 (s, 1H), 8.32 (d, *J* = 8.4 Hz, 1H), 8.00 (d, *J* = 7.7 Hz, 1H), 7.84 (d, *J* = 8.2 Hz, 1H), 7.66 (t, *J* = 7.6 Hz, 1H), 7.60 (t, *J* = 7.5 Hz, 1H), 7.47 – 7.41 (m, 2H), 7.39 (t, *J* = 7.7 Hz, 1H), 7.37 – 7.30 (m, 1H), 7.27 (t, *J* = 7.5 Hz, 2H), 7.00 (d, *J* = 7.1 Hz, 1H), 5.37 (dd, *J* = 8.2, 1.8 Hz, 1H), 3.43 (dd, *J* = 16.2, 8.4 Hz, 1H), 2.56 (dd, *J* = 16.3, 1.8 Hz, 1H).

**<sup>13</sup>C NMR** (126 MHz, DMSO-*d*<sub>6</sub>) δ 169.0, 164.8, 159.6, 137.1, 134.0, 130.1, 129.9, 129.1, 129.0, 128.5, 128.0, 126.9, 126.7, 126.1, 125.6, 123.5, 123.0, 92.1, 28.8.

**HRMS** (ESI): exact mass calculated for C<sub>22</sub>H<sub>17</sub>N<sub>2</sub>O<sub>2</sub> [M + H]<sup>+</sup> 341.1288, found 341.1286.

**m.p.** = 231-233 °C.

The *ee* value was determined by HPLC analysis on a Chiralcel IB column (*n*-hexane/isopropanol = 90/10, flow rate = 1.0 mL/min, λ = 254 nm, t<sub>R</sub>(major) = 19.262 min, t<sub>R</sub>(minor) = 23.066 min.)

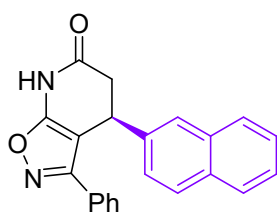

**3o**

White solid, 93% yield, 98% *ee*.

**<sup>1</sup>H NMR** (500 MHz, CDCl<sub>3</sub>) δ 8.97 (s, 1H), 7.81 (t, *J* = 7.5 Hz, 2H), 7.75 – 7.69 (m, 1H), 7.56 – 7.43 (m, 5H), 7.37 – 7.26 (m, 4H), 4.51 (dd, *J* = 8.2, 2.3 Hz, 1H), 3.25 (dd, *J* = 16.4, 8.2 Hz, 1H), 2.99 (dd, *J* = 16.4, 2.3 Hz, 1H).

**<sup>13</sup>C NMR** (126 MHz, CDCl<sub>3</sub>) δ 169.3, 162.5, 161.1, 138.5, 133.6, 132.9, 130.2, 129.6, 129.0, 128.5, 128.0, 127.8, 127.7, 126.7, 126.3, 125.5, 125.0, 93.7, 40.8, 34.2.

**HRMS** (ESI): exact mass calculated for C<sub>22</sub>H<sub>17</sub>N<sub>2</sub>O<sub>2</sub> [M + H]<sup>+</sup> 341.1288, found 341.1285.

**m.p.** = 196-198 °C.

The *ee* value was determined by HPLC analysis on a Chiralcel IG column (*n*-hexane/isopropanol = 90/10, flow rate = 1.0 mL/min, λ = 254 nm, t<sub>R</sub>(major) = 21.377 min, t<sub>R</sub>(minor) = 27.950 min.)

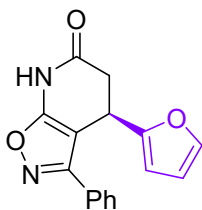

**3p**

White solid, 69% yield, 99% *ee*.

**<sup>1</sup>H NMR** (500 MHz, DMSO-*d*<sub>6</sub>) δ 11.85 (s, 1H), 7.72 – 7.67 (m, 2H), 7.63 – 7.40 (m, 4H), 6.34 – 6.30 (m, 1H), 6.05 (s, 1H), 4.59 (d, *J* = 7.5 Hz, 1H), 3.21 (dd, *J* = 16.3, 7.7 Hz, 1H), 2.69 (d, *J* = 16.3 Hz, 1H).

**<sup>13</sup>C NMR** (126 MHz, DMSO-*d*<sub>6</sub>) δ 169.0, 164.0, 159.5, 154.6, 143.0, 130.3, 129.2, 128.5, 127.2, 110.6, 106.0, 91.2, 37.1, 27.4.

**HRMS** (ESI): exact mass calculated for C<sub>16</sub>H<sub>13</sub>N<sub>2</sub>O<sub>3</sub> [M + H]<sup>+</sup> 281.0928, found 281.0922.

**m.p.** = 152-154 °C.

The *ee* value was determined by HPLC analysis on a Chiralcel IB column (*n*-hexane/isopropanol = 90/10, flow rate = 1.0 mL/min, λ = 254 nm, t<sub>R</sub>(major) = 17.491 min, t<sub>R</sub>(minor) = 15.645 min.)

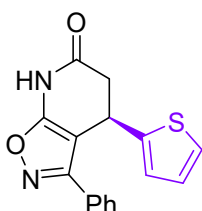

**3q**

White solid, 90% yield, >99% *ee*.

**<sup>1</sup>H NMR** (500 MHz, DMSO-*d*<sub>6</sub>) δ 11.90 (s, 1H), 7.70 – 7.62 (m, 2H), 7.51 – 7.42 (m, 3H), 7.34 (dd, *J* = 5.1, 1.2 Hz, 1H), 6.94 (dd, *J* = 5.1, 3.5 Hz, 1H), 6.87 (dt, *J* = 3.5, 1.1 Hz, 1H), 4.86 – 4.81 (m, 1H), 3.32 (dd, *J* = 16.2, 7.6 Hz, 1H), 2.68 (dd, *J* = 16.2, 2.0 Hz, 1H).

**<sup>13</sup>C NMR** (126 MHz, CDCl<sub>3</sub>) δ 168.7, 162.0, 160.6, 145.1, 130.4, 129.1, 128.4, 127.6, 127.5, 125.2, 124.8, 94.6, 41.4, 29.8.

**HRMS** (ESI): exact mass calculated for C<sub>16</sub>H<sub>13</sub>N<sub>2</sub>O<sub>2</sub>S [M + H]<sup>+</sup> 297.0700, found 297.0697.

**m.p.** = 195-197 °C.

The *ee* value was determined by HPLC analysis on a Chiralcel IH column (*n*-hexane/isopropanol = 80/20, flow rate = 1.0 mL/min,  $\lambda$  = 254 nm,  $t_R$ (major) = 18.563 min,  $t_R$ (minor) = 16.349 min.)

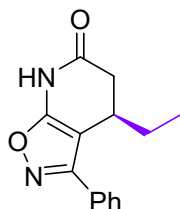

**3r**

White solid, 48% yield, 99% *ee*.

**<sup>1</sup>H NMR** (500 MHz, CDCl<sub>3</sub>)  $\delta$  8.52 (s, 1H), 7.76 – 7.68 (m, 2H), 7.51 – 7.43 (m, 3H), 3.21 – 3.13 (m, 1H), 2.92 (dd, *J* = 16.6, 7.5 Hz, 1H), 2.71 (dd, *J* = 16.5, 2.1 Hz, 1H), 1.63 – 1.45 (m, 2H), 0.82 (t, *J* = 7.4 Hz, 3H).

**<sup>13</sup>C NMR** (126 MHz, CDCl<sub>3</sub>)  $\delta$  170.1, 161.3, 160.7, 130.2, 129.3, 129.1, 127.5, 95.3, 36.8, 30.0, 28.2, 10.8.

**HRMS** (ESI): exact mass calculated for C<sub>14</sub>H<sub>15</sub>N<sub>2</sub>O<sub>2</sub> [M + H]<sup>+</sup> 243.1134, found 243.1133.

**m.p.** = 90-92 °C.

The *ee* value was determined by HPLC analysis on a Chiralcel IG column (*n*-hexane/isopropanol = 90/10, flow rate = 1.0 mL/min,  $\lambda$  = 254 nm,  $t_R$ (major) = 15.793 min,  $t_R$ (minor) = 13.737 min.)

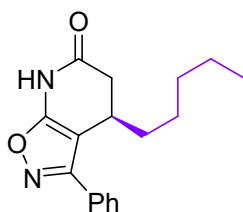

**3s**

White solid, 70% yield, >99% *ee*.

**<sup>1</sup>H NMR** (500 MHz, CDCl<sub>3</sub>) δ 8.53 (s, 1H), 7.75 – 7.66 (m, 2H), 7.52 – 7.43 (m, 3H), 3.20 (tdd, *J* = 7.6, 6.0, 2.1 Hz, 1H), 2.91 (dd, *J* = 16.5, 7.3 Hz, 1H), 2.71 (dd, *J* = 16.5, 2.1 Hz, 1H), 1.58 – 1.41 (m, 2H), 1.23 – 1.08 (m, 6H), 0.81 – 0.75 (m, 3H).

**<sup>13</sup>C NMR** (126 MHz, CDCl<sub>3</sub>) δ 170.1, 161.2, 160.7, 130.2, 129.3, 129.1, 127.6, 95.7, 37.1, 35.1, 31.6, 28.5, 25.9, 22.5, 14.0.

**HRMS** (ESI): exact mass calculated for C<sub>17</sub>H<sub>21</sub>N<sub>2</sub>O<sub>2</sub> [M + H]<sup>+</sup> 285.1605, found 285.1600.

**m.p.** = 97-99 °C.

The *ee* value was determined by HPLC analysis on a Chiralcel IH column (*n*-hexane/isopropanol = 80/20, flow rate = 1.0 mL/min, λ = 254 nm, t<sub>R</sub>(major) = 10.942 min, t<sub>R</sub>(minor) = 7.641 min.)

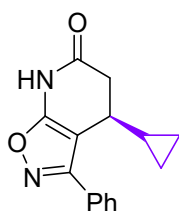

**3t**

White solid, 93% yield, 99% *ee*.

**<sup>1</sup>H NMR** (500 MHz, CDCl<sub>3</sub>) δ 8.96 (s, 1H), 7.77 – 7.70 (m, 2H), 7.50 – 7.43 (m, 3H), 3.01 – 2.92 (m, 2H), 2.85 – 2.77 (m, 1H), 0.95 – 0.85 (m, 1H), 0.47 – 0.38 (m, 1H), 0.37 – 0.28 (m, 1H), 0.08 – 0.02 (m, 1H), -0.02 – -0.08 (m, 1H).

**<sup>13</sup>C NMR** (126 MHz, CDCl<sub>3</sub>) δ 170.5, 161.7, 161.0, 130.2, 129.1, 129.0, 127.8, 93.7, 38.3, 31.5, 15.9, 3.0, 2.7.

**HRMS** (ESI): exact mass calculated for C<sub>15</sub>H<sub>15</sub>N<sub>2</sub>O<sub>2</sub> [M + H]<sup>+</sup> 255.1134, found 255.1129.

**m.p.** = 140-142 °C.

The *ee* value was determined by HPLC analysis on a Chiralcel IH column (*n*-hexane/isopropanol = 80/20, flow rate = 1.0 mL/min, λ = 254 nm, t<sub>R</sub>(major) = 15.911 min, t<sub>R</sub>(minor) = 12.787 min.)

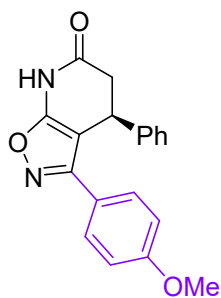

**4a**

White solid, 99% yield, 97% *ee*.

**<sup>1</sup>H NMR** (500 MHz, DMSO-*d*<sub>6</sub>) δ 11.81 (s, 1H), 7.52 – 7.47 (m, 2H), 7.31 (t, *J* = 7.6 Hz, 2H), 7.26 – 7.19 (m, 1H), 7.14 (d, *J* = 7.7 Hz, 2H), 6.95 (d, *J* = 8.9 Hz, 2H), 4.49 (dd, *J* = 8.1, 2.1 Hz, 1H), 3.75 (d, *J* = 1.6 Hz, 3H), 3.30 (dd, *J* = 16.2, 8.1 Hz, 1H), 2.56 (dt, *J* = 16.1, 1.8 Hz, 1H).

**<sup>13</sup>C NMR** (126 MHz, DMSO-*d*<sub>6</sub>) δ 169.0, 163.9, 160.5, 159.2, 142.4, 129.1, 128.4, 127.2, 126.6, 120.8, 114.4, 92.4, 55.3, 40.6, 33.0.

**HRMS** (ESI): exact mass calculated for C<sub>19</sub>H<sub>16</sub>N<sub>2</sub>O<sub>3</sub>Na [M + Na]<sup>+</sup> 343.1055, found 343.1051.

**m.p.** = 182-184 °C.

The *ee* value was determined by HPLC analysis on a Chiralcel IH column (*n*-hexane/isopropanol = 80/20, flow rate = 1.0 mL/min, λ = 254 nm, t<sub>R</sub>(major) = 23.634 min, t<sub>R</sub>(minor) = 18.874 min.)

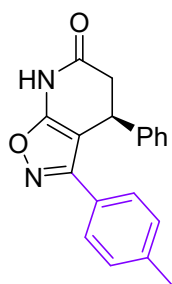

**4b**

White solid, 99% yield, 97% *ee*.

**<sup>1</sup>H NMR** (500 MHz, DMSO-*d*<sub>6</sub>) δ 11.82 (s, 1H), 7.47 – 7.42 (m, 2H), 7.33 – 7.27 (m, 2H), 7.25 – 7.18 (m, 3H), 7.15 – 7.10 (m, 2H), 4.50 (dd, *J* = 8.1, 2.1 Hz, 1H), 3.30 (dd, *J* = 16.2, 8.1 Hz, 1H), 2.55 (dd, *J* = 16.3, 2.2 Hz, 1H), 2.29 (s, 3H).



$^{13}\text{C}$  NMR (126 MHz, DMSO- $d_6$ )  $\delta$  169.0, 163.9, 159.5, 142.4, 139.8, 129.5, 129.0, 127.2, 126.9, 126.5, 125.7, 92.6, 40.5, 33.0, 20.9.

**HRMS** (ESI): exact mass calculated for  $\text{C}_{19}\text{H}_{16}\text{N}_2\text{O}_2\text{Na}$   $[\text{M} + \text{Na}]^+$  327.1106, found 327.1103.

**m.p.** = 191-193 °C.

The *ee* value was determined by HPLC analysis on a Chiralcel IG column (*n*-hexane/isopropanol = 80/20, flow rate = 1.0 mL/min,  $\lambda$  = 254 nm,  $t_{\text{R}}$ (major) = 11.735 min,  $t_{\text{R}}$ (minor) = 13.209 min.)

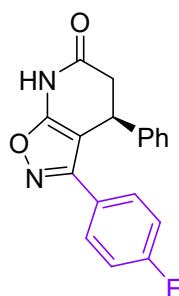

**4c**

White solid, 99% yield, 97% *ee*.

$^1\text{H}$  NMR (500 MHz, DMSO- $d_6$ )  $\delta$  11.88 (s, 1H), 7.63 – 7.55 (m, 2H), 7.34 – 7.19 (m, 5H), 7.16 – 7.11 (m, 2H), 4.52 (dd,  $J$  = 8.0, 2.6 Hz, 1H), 3.29 (dd,  $J$  = 16.2, 8.1 Hz, 1H), 2.59 (dd,  $J$  = 16.3, 2.5 Hz, 1H).

$^{13}\text{C}$  NMR (126 MHz, DMSO- $d_6$ )  $\delta$  169.0, 164.2, 163.0 (d,  $J$  = 247.7 Hz), 158.8, 142.2, 129.3 (d,  $J$  = 8.6 Hz), 129.1, 127.2, 126.6, 125.0 (d,  $J$  = 3.2 Hz), 116.1 (d,  $J$  = 21.9 Hz), 92.7, 40.5, 32.9.

$^{19}\text{F}$  NMR (471 MHz, DMSO- $d_6$ )  $\delta$  -110.5.

**HRMS** (ESI): exact mass calculated for  $\text{C}_{18}\text{H}_{14}\text{FN}_2\text{O}_2$   $[\text{M} + \text{H}]^+$  309.1042, found 309.1034.

**m.p.** = 154-156 °C.

The *ee* value was determined by HPLC analysis on a Chiralcel IB column (*n*-hexane/isopropanol = 80/20, flow rate = 1.0 mL/min,  $\lambda$  = 254 nm,  $t_{\text{R}}$ (major) = 8.249 min,  $t_{\text{R}}$ (minor) = 10.307 min.)

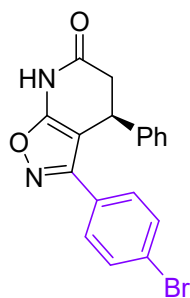

**4d**

White solid, 90% yield, 98% *ee*.

**<sup>1</sup>H NMR** (500 MHz, DMSO-*d*<sub>6</sub>) δ 11.90 (s, 1H), 7.63 – 7.58 (m, 2H), 7.52 – 7.47 (m, 2H), 7.29 (t, *J* = 7.5 Hz, 2H), 7.25 – 7.18 (m, 1H), 7.15 – 7.10 (m, 2H), 4.53 (dd, *J* = 8.1, 2.6 Hz, 1H), 3.29 (dd, *J* = 16.2, 8.0 Hz, 1H), 2.59 (dd, *J* = 16.2, 2.5 Hz, 1H).

**<sup>13</sup>C NMR** (126 MHz, DMSO-*d*<sub>6</sub>) δ 169.0, 164.3, 158.7, 142.2, 132.0, 129.1, 129.0, 127.7, 127.2, 126.6, 123.6, 92.8, 40.4, 32.9.

**HRMS** (ESI): exact mass calculated for C<sub>18</sub>H<sub>14</sub>BrN<sub>2</sub>O<sub>2</sub> [M + H]<sup>+</sup> 369.0241, found 369.0234.

**m.p.** = 189-191 °C.

The *ee* value was determined by HPLC analysis on a Chiralcel ID column (*n*-hexane/isopropanol = 80/20, flow rate = 1.0 mL/min, λ = 254 nm, *t*<sub>R</sub>(major) = 8.764 min, *t*<sub>R</sub>(minor) = 11.827 min.)

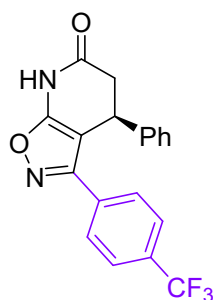

**4e**

White solid, 89% yield, 97% *ee*.

**<sup>1</sup>H NMR** (500 MHz, CDCl<sub>3</sub>) δ 8.90 (s, 1H), 7.58 (s, 4H), 7.35 – 7.29 (m, 2H), 7.29 – 7.24 (m, 1H), 7.14 (dd, *J* = 7.2, 1.8 Hz, 2H), 4.35 (dd, *J* = 8.1, 2.9 Hz, 1H), 3.21 (dd, *J* = 16.5, 8.1 Hz, 1H), 2.91 (dd, *J* = 16.4, 2.9 Hz, 1H).

**<sup>13</sup>C NMR** (126 MHz, CDCl<sub>3</sub>) δ 169.2, 162.8, 159.9, 141.0, 132.0 (t, *J* = 16.3 Hz), 129.6, 128.1, 128.0, 126.8, 125.9 (q, *J* = 3.7 Hz), 124.9, 122.8, 94.0, 40.8, 34.2.

$^{19}\text{F}$  NMR (471 MHz,  $\text{CDCl}_3$ )  $\delta$  -63.0.

**HRMS** (ESI): exact mass calculated for  $\text{C}_{19}\text{H}_{14}\text{F}_3\text{N}_2\text{O}_2$   $[\text{M} + \text{H}]^+$  359.1004, found 359.1006.

**m.p.** = 169-171  $^\circ\text{C}$ .

The *ee* value was determined by HPLC analysis on a Chiralcel IB column (*n*-hexane/isopropanol = 80/20, flow rate = 1.0 mL/min,  $\lambda$  = 254 nm,  $t_{\text{R}}$ (major) = 7.647 min,  $t_{\text{R}}$ (minor) = 9.905 min.)

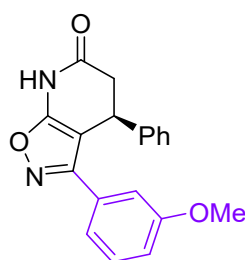

**4f**

White solid, 90% yield, 97% *ee*.

$^1\text{H}$  NMR (500 MHz,  $\text{DMSO}-d_6$ )  $\delta$  11.88 (s, 1H), 7.36 – 7.29 (m, 3H), 7.27 – 7.20 (m, 1H), 7.18 – 7.13 (m, 3H), 7.02 – 6.94 (m, 2H), 4.51 (dd,  $J$  = 8.1, 2.1 Hz, 1H), 3.62 (s, 3H), 3.30 (dd,  $J$  = 16.2, 8.2 Hz, 1H), 2.55 (dd,  $J$  = 16.3, 2.1 Hz, 1H).

$^{13}\text{C}$  NMR (126 MHz,  $\text{DMSO}-d_6$ )  $\delta$  169.0, 164.2, 159.5, 159.4, 142.4, 130.2, 129.7, 129.1, 127.3, 126.6, 119.2, 116.2, 112.0, 92.7, 55.0, 40.6, 33.0.

**HRMS** (ESI): exact mass calculated for  $\text{C}_{19}\text{H}_{16}\text{N}_2\text{O}_3\text{Na}$   $[\text{M} + \text{Na}]^+$  343.1055, found 343.1052.

**m.p.** = 152-154  $^\circ\text{C}$ .

The *ee* value was determined by HPLC analysis on a Chiralcel IC column (*n*-hexane/isopropanol = 70/30, flow rate = 1.0 mL/min,  $\lambda$  = 254 nm,  $t_{\text{R}}$ (major) = 27.322 min,  $t_{\text{R}}$ (minor) = 21.884 min.)

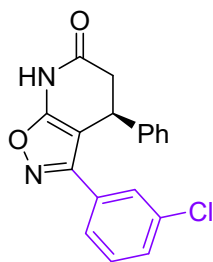

**4g**

White solid, 99% yield, 95% *ee*.

**<sup>1</sup>H NMR** (500 MHz, CDCl<sub>3</sub>) δ 8.56 (s, 1H), 7.49 (t, *J* = 1.9 Hz, 1H), 7.37 – 7.22 (m, 6H), 7.17 – 7.12 (m, 2H), 4.33 (dd, *J* = 8.1, 3.0 Hz, 1H), 3.19 (dd, *J* = 16.5, 8.1 Hz, 1H), 2.89 (dd, *J* = 16.4, 3.0 Hz, 1H).

**<sup>13</sup>C NMR** (126 MHz, CDCl<sub>3</sub>) δ 168.7, 162.5, 159.9, 141.1, 134.9, 130.24, 130.20, 130.15, 129.5, 128.0, 127.9, 126.8, 125.8, 94.0, 40.8, 34.3.

**HRMS** (ESI): exact mass calculated for C<sub>18</sub>H<sub>14</sub>ClN<sub>2</sub>O<sub>2</sub> [M + H]<sup>+</sup> 325.0738, found 325.0737.

**m.p.** = 202-204 °C.

The *ee* value was determined by HPLC analysis on a Chiralcel IC column (*n*-hexane/isopropanol = 70/30, flow rate = 1.0 mL/min, λ = 254 nm, t<sub>R</sub>(major) = 12.203 min, t<sub>R</sub>(minor) = 16.334 min.)

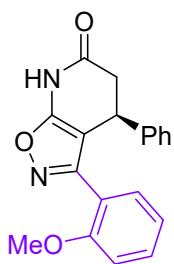

**4h**

White solid, 99% yield, 96% *ee*.

**<sup>1</sup>H NMR** (500 MHz, CDCl<sub>3</sub>) δ 8.87 (s, 1H), 7.36 (dd, *J* = 7.6, 1.7 Hz, 1H), 7.32 – 7.26 (m, 1H), 7.17 – 7.05 (m, 3H), 7.02 – 6.97 (m, 2H), 6.90 (td, *J* = 7.5, 0.9 Hz, 1H), 6.69 (d, *J* = 8.1 Hz, 1H), 4.23 (t, *J* = 6.9 Hz, 1H), 3.47 (s, 3H), 3.07 (dd, *J* = 16.5, 7.3 Hz, 1H), 2.80 (dd, *J* = 16.5, 6.6 Hz, 1H).

$^{13}\text{C}$  NMR (126 MHz,  $\text{CDCl}_3$ )  $\delta$  170.0, 161.2, 160.1, 157.0, 141.3, 131.5, 130.6, 128.6, 127.1, 126.9, 120.7, 117.6, 110.5, 96.2, 55.0, 41.2, 35.2.

**HRMS** (ESI): exact mass calculated for  $\text{C}_{19}\text{H}_{17}\text{N}_2\text{O}_3$   $[\text{M} + \text{H}]^+$  321.1234, found 321.1231.

**m.p.** = 198-200 °C.

The *ee* value was determined by HPLC analysis on a Chiralcel IG column (*n*-hexane/isopropanol = 80/20, flow rate = 1.0 mL/min,  $\lambda$  = 254 nm,  $t_{\text{R}}$ (major) = 16.723 min,  $t_{\text{R}}$ (minor) = 12.630 min.)

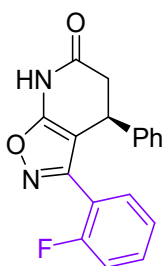

**4i**

White solid, 58% yield, 99% *ee*.

$^1\text{H}$  NMR (500 MHz,  $\text{DMSO}-d_6$ )  $\delta$  12.02 – 11.73 (m, 1H), 7.49 – 7.42 (m, 1H), 7.39 (td,  $J$  = 7.6, 1.8 Hz, 1H), 7.26 – 7.15 (m, 4H), 7.15 – 7.08 (m, 1H), 7.07 – 6.99 (m, 2H), 4.31 (dd,  $J$  = 7.6, 5.1 Hz, 1H), 3.14 (dd,  $J$  = 16.3, 7.7 Hz, 1H), 2.63 (dd,  $J$  = 16.3, 5.2 Hz, 1H).

$^{13}\text{C}$  NMR (126 MHz,  $\text{DMSO}-d_6$ )  $\delta$  169.3, 163.7, 159.1 (d,  $J$  = 249.7 Hz), 156.5, 141.9, 132.2 (d,  $J$  = 8.2 Hz), 130.3 (d,  $J$  = 2.9 Hz), 128.6, 126.9, 126.6, 124.7 (d,  $J$  = 3.4 Hz), 116.3 (d,  $J$  = 14.4 Hz), 116.1 (d,  $J$  = 21.3 Hz), 94.3, 40.4, 33.3 (d,  $J$  = 3.7 Hz).

$^{19}\text{F}$  NMR (471 MHz,  $\text{DMSO}-d_6$ )  $\delta$  -112.8.

**HRMS** (ESI): exact mass calculated for  $\text{C}_{18}\text{H}_{14}\text{FN}_2\text{O}_2$   $[\text{M} + \text{H}]^+$  309.1042, found 309.1035.

**m.p.** = 164-166 °C.

The *ee* value was determined by HPLC analysis on a Chiralcel IG column (*n*-hexane/isopropanol = 80/20, flow rate = 1.0 mL/min,  $\lambda$  = 254 nm,  $t_{\text{R}}$ (major) = 11.549 min,  $t_{\text{R}}$ (minor) = 8.768 min.)

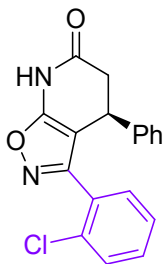

**4j**

White solid, 41% yield, 96% *ee*.

**<sup>1</sup>H NMR** (500 MHz, CDCl<sub>3</sub>) δ 8.66 (s, 1H), 7.29 – 7.22 (m, 2H), 7.21 – 7.13 (m, 2H), 7.13 – 7.05 (m, 3H), 7.00 – 6.94 (m, 2H), 4.29 (t, *J* = 7.3 Hz, 1H), 3.11 (dd, *J* = 16.6, 7.4 Hz, 1H), 2.87 (dd, *J* = 16.7, 7.3 Hz, 1H).

**<sup>13</sup>C NMR** (126 MHz, DMSO-*d*<sub>6</sub>) δ 169.3, 163.1, 159.4, 141.4, 132.1, 131.3, 131.1, 129.5, 128.4, 127.7, 127.1, 126.8, 126.8, 94.9, 40.2, 33.7.

**HRMS** (ESI): exact mass calculated for C<sub>18</sub>H<sub>14</sub>ClN<sub>2</sub>O<sub>2</sub> [M + H]<sup>+</sup> 325.0747, found 325.0739.

**m.p.** = 114-116 °C.

The *ee* value was determined by HPLC analysis on a Chiralcel ID column (*n*-hexane/isopropanol = 80/20, flow rate = 1.0 mL/min, λ = 254 nm, t<sub>R</sub>(major) = 11.106 min, t<sub>R</sub>(minor) = 8.910 min.)

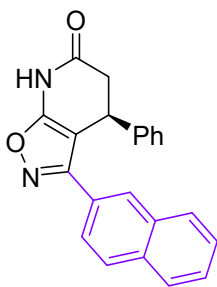

**4k**

White solid, 99% yield, 97% *ee*.

**<sup>1</sup>H NMR** (500 MHz, CDCl<sub>3</sub>) δ 8.11(s, 1H), 7.88 – 7.86 (m, 1H), 7.84 – 7.80 (m, 2H), 7.70 – 7.63 (m, 2H), 7.53 – 7.44 (m, 2H), 7.36 – 7.31 (m, 2H), 7.29 – 7.27 (m, 1H), 7.24 – 7.20 (m, 2H), 4.45 (dd, *J* = 8.2, 2.5 Hz, 1H), 3.24 (dd, *J* = 16.4, 8.2 Hz, 1H), 2.92 (dd, *J* = 16.4, 2.5 Hz, 1H).

$^{13}\text{C}$  NMR (126 MHz, DMSO- $d_6$ )  $\delta$  169.2, 164.3, 159.5, 142.7, 133.3, 132.6, 129.3, 128.7, 128.4, 127.8, 127.5, 127.3, 127.1, 127.0, 126.7, 126.0, 124.0, 93.1, 40.4, 33.2.

**HRMS** (ESI): exact mass calculated for  $\text{C}_{22}\text{H}_{17}\text{N}_2\text{O}_2$   $[\text{M} + \text{H}]^+$  341.1288, found 341.1284.

**m.p.** = 199-201 °C.

The *ee* value was determined by HPLC analysis on a Chiralcel IG column (*n*-hexane/isopropanol = 80/20, flow rate = 1.0 mL/min,  $\lambda$  = 254 nm,  $t_{\text{R}}$ (major) = 13.708 min,  $t_{\text{R}}$ (minor) = 17.532 min.)

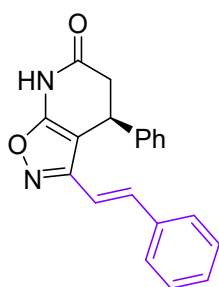

**4l**

White solid, 99% yield, 98% *ee*.

$^1\text{H}$  NMR (500 MHz,  $\text{CDCl}_3$ )  $\delta$  8.57 (s, 1H), 7.36 (dd,  $J$  = 8.3, 6.8 Hz, 2H), 7.33 – 7.19 (m, 8H), 6.93 (d,  $J$  = 16.7 Hz, 1H), 6.71 (d,  $J$  = 16.7 Hz, 1H), 4.38 (dd,  $J$  = 8.1, 4.4 Hz, 1H), 3.20 (dd,  $J$  = 16.5, 8.1 Hz, 1H), 2.90 (dd,  $J$  = 16.5, 4.4 Hz, 1H).

$^{13}\text{C}$  NMR (126 MHz,  $\text{CDCl}_3$ )  $\delta$  168.9, 161.7, 159.4, 141.2, 137.3, 135.7, 129.6, 129.2, 128.9, 128.0, 127.03, 127.01, 114.9, 93.6, 40.7, 34.6.

**HRMS** (ESI): exact mass calculated for  $\text{C}_{20}\text{H}_{17}\text{N}_2\text{O}_2$   $[\text{M} + \text{H}]^+$  317.1287, found 317.1287.

**m.p.** = 191-193 °C.

The *ee* value was determined by HPLC analysis on a Chiralcel IH column (*n*-hexane/isopropanol = 80/20, flow rate = 1.0 mL/min,  $\lambda$  = 254 nm,  $t_{\text{R}}$ (major) = 23.126 min,  $t_{\text{R}}$ (minor) = 17.188 min.)

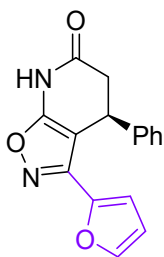

**4m**

White solid, 82% yield, 97% *ee*.

**<sup>1</sup>H NMR** (500 MHz, DMSO-*d*<sub>6</sub>) δ 11.90 (s, 1H), 7.82 (d, *J* = 1.7 Hz, 1H), 7.30 (t, *J* = 7.5 Hz, 2H), 7.22 (t, *J* = 7.3 Hz, 1H), 7.18 – 7.13 (m, 2H), 6.74 (d, *J* = 3.6 Hz, 1H), 6.61 – 6.57 (m, 1H), 4.49 (dd, *J* = 8.3, 2.0 Hz, 1H), 3.32 (dd, *J* = 16.3, 8.4 Hz, 1H), 2.56 (dd, *J* = 16.3, 2.0 Hz, 1H).

**<sup>13</sup>C NMR** (126 MHz, DMSO-*d*<sub>6</sub>) δ 169.2, 163.7, 151.8, 145.0, 142.8, 142.5, 129.0, 127.2, 126.5, 111.9, 92.0, 40.1, 32.6.

**HRMS** (ESI): exact mass calculated for C<sub>16</sub>H<sub>13</sub>N<sub>2</sub>O<sub>3</sub> [M + H]<sup>+</sup> 281.0928, found 281.0920.

**m.p.** = 164-166 °C.

The *ee* value was determined by HPLC analysis on a Chiralcel IB column (*n*-hexane/isopropanol = 80/20, flow rate = 1.0 mL/min, λ = 254 nm, t<sub>R</sub>(major) = 9.424 min, t<sub>R</sub>(minor) = 12.132 min.)

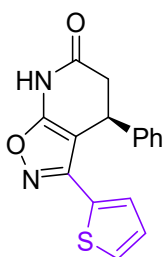

**4n**

White solid, 82% yield, 95% *ee*.

**<sup>1</sup>H NMR** (500 MHz, DMSO-*d*<sub>6</sub>) δ 11.89 (s, 1H), 7.71 – 7.66 (m, 1H), 7.32 (t, *J* = 7.5 Hz, 2H), 7.27 – 7.20 (m, 2H), 7.20 – 7.15 (m, 2H), 7.13 – 7.08 (m, 1H), 4.53 (dd, *J* = 8.3, 1.9 Hz, 1H), 3.32 (dd, *J* = 16.3, 8.3 Hz, 1H), 2.56 (dt, *J* = 16.4, 1.5 Hz, 1H).



$^{13}\text{C}$  NMR (126 MHz, DMSO- $d_6$ )  $\delta$  169.0, 164.1, 154.9, 142.2, 129.1, 128.8, 128.4, 128.1, 127.3, 126.6, 92.2, 40.4, 32.7.

**HRMS** (ESI): exact mass calculated for  $\text{C}_{16}\text{H}_{13}\text{N}_2\text{O}_2\text{S}$   $[\text{M} + \text{H}]^+$  297.0700, found 297.0694.

**m.p.** = 176-178 °C.

The *ee* value was determined by HPLC analysis on a Chiralcel IB column (*n*-hexane/isopropanol = 80/20, flow rate = 1.0 mL/min,  $\lambda$  = 254 nm,  $t_{\text{R}}$ (major) = 9.649 min,  $t_{\text{R}}$ (minor) = 12.160 min.)

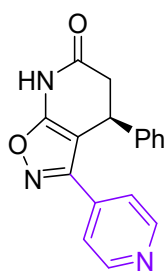

**4o**

White solid, 56% yield, 99% *ee*.

$^1\text{H}$  NMR (500 MHz,  $\text{CDCl}_3$ )  $\delta$  9.78 (s, 1H), 8.64 – 8.59 (m, 2H), 7.41 – 7.36 (m, 2H), 7.35 – 7.24 (m, 3H), 7.14 (dd,  $J$  = 7.3, 1.7 Hz, 2H), 4.37 (dd,  $J$  = 8.1, 3.1 Hz, 1H), 3.21 (dd,  $J$  = 16.5, 8.1 Hz, 1H), 2.91 (dd,  $J$  = 16.5, 3.1 Hz, 1H).

$^{13}\text{C}$  NMR (126 MHz,  $\text{CDCl}_3$ )  $\delta$  169.0, 163.4, 158.9, 150.3, 140.9, 136.4, 129.6, 128.2, 126.8, 121.9, 93.9, 40.8, 34.2.

**HRMS** (ESI): exact mass calculated for  $\text{C}_{17}\text{H}_{14}\text{N}_3\text{O}_2$   $[\text{M} + \text{H}]^+$  292.1088, found 292.1079.

**m.p.** = 180-182 °C.

The *ee* value was determined by HPLC analysis on a Chiralcel IH column (*n*-hexane/isopropanol = 80/20, flow rate = 1.0 mL/min,  $\lambda$  = 254 nm,  $t_{\text{R}}$ (major) = 35.204 min,  $t_{\text{R}}$ (minor) = 29.772 min.)

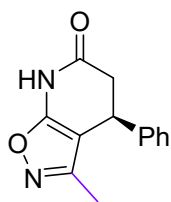

**4p**

White solid, 99% yield, 97% *ee*.

**<sup>1</sup>H NMR** (500 MHz, CDCl<sub>3</sub>) δ 8.91 (s, 1H), 7.38 – 7.32 (m, 2H), 7.31 – 7.27 (m, 1H), 7.21 – 7.15 (m, 2H), 4.12 (t, *J* = 7.3 Hz, 1H), 3.08 (dd, *J* = 16.7, 7.7 Hz, 1H), 2.85 (dd, *J* = 16.7, 6.9 Hz, 1H), 1.89 (s, 3H).

**<sup>13</sup>C NMR** (126 MHz, CDCl<sub>3</sub>) δ 169.7, 161.0, 159.1, 141.2, 129.3, 127.9, 127.1, 94.8, 40.5, 34.2, 10.6.

**HRMS** (ESI): exact mass calculated for C<sub>13</sub>H<sub>13</sub>N<sub>2</sub>O<sub>2</sub> [M + H]<sup>+</sup> 229.0976, found 229.0969.

**m.p.** = 154-156 °C.

The *ee* value was determined by HPLC analysis on a Chiralcel IH column (*n*-hexane/isopropanol = 80/20, flow rate = 1.0 mL/min, λ = 254 nm, t<sub>R</sub>(major) = 16.872 min, t<sub>R</sub>(minor) = 12.792 min.)

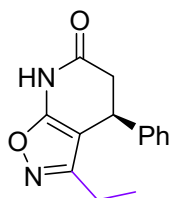

**4q**

White solid, 71% yield, 97% *ee*.

**<sup>1</sup>H NMR** (500 MHz, CDCl<sub>3</sub>) δ 8.76 (s, 1H), 7.37 – 7.31 (m, 2H), 7.30 – 7.27 (m, 1H), 7.19 – 7.14 (m, 2H), 4.13 (dd, *J* = 7.8, 6.2 Hz, 1H), 3.09 (dd, *J* = 16.7, 7.8 Hz, 1H), 2.83 (dd, *J* = 16.7, 6.2 Hz, 1H), 2.41 – 2.18 (m, 2H), 1.03 (t, *J* = 7.6 Hz, 3H).

**<sup>13</sup>C NMR** (126 MHz, CDCl<sub>3</sub>) δ 169.5, 163.8, 161.1, 141.5, 129.3, 127.8, 127.1, 94.1, 40.7, 34.3, 19.2, 11.7.

**HRMS** (ESI): exact mass calculated for C<sub>14</sub>H<sub>15</sub>N<sub>2</sub>O<sub>2</sub> [M + H]<sup>+</sup> 243.1134, found 243.1129.

**m.p.** = 135-137 °C.

The *ee* value was determined by HPLC analysis on a Chiralcel IB column (*n*-hexane/isopropanol = 90/10, flow rate = 1.0 mL/min,  $\lambda$  = 254 nm,  $t_R$ (major) = 13.188 min,  $t_R$ (minor) = 16.045 min.)

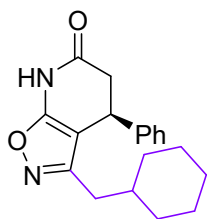

**4r**

White solid, 91% yield, 94% *ee*.

**$^1\text{H NMR}$**  (500 MHz,  $\text{CDCl}_3$ )  $\delta$  8.54 (s, 1H), 7.36 – 7.31 (m, 2H), 7.31 – 7.27 (m, 1H), 7.18 – 7.13 (m, 2H), 4.10 (dd,  $J$  = 7.8, 6.1 Hz, 1H), 3.09 (dd,  $J$  = 16.6, 7.8 Hz, 1H), 2.82 (dd,  $J$  = 16.6, 6.1 Hz, 1H), 2.25 (dd,  $J$  = 14.2, 7.2 Hz, 1H), 2.04 (dd,  $J$  = 14.2, 7.1 Hz, 1H), 1.63 – 1.46 (m, 4H), 1.40 – 1.34 (m, 1H), 1.30 – 1.18 (m, 1H), 1.10 – 0.98 (m, 2H), 0.98 – 0.85 (m, 1H), 0.85 – 0.72 (m, 2H).

**$^{13}\text{C NMR}$**  (126 MHz,  $\text{CDCl}_3$ )  $\delta$  169.3, 161.8, 161.0, 141.5, 129.3, 127.8, 127.1, 94.6, 40.8, 36.3, 34.5, 33.1, 32.9, 26.2, 26.1, 26.0.

**HRMS** (ESI): exact mass calculated for  $\text{C}_{19}\text{H}_{23}\text{N}_2\text{O}_2$   $[\text{M} + \text{H}]^+$  311.1756, found 311.1754.

**m.p.** = 170-172 °C.

The *ee* value was determined by HPLC analysis on a Chiralcel IG column (*n*-hexane/isopropanol = 90/10, flow rate = 1.0 mL/min,  $\lambda$  = 254 nm,  $t_R$ (major) = 15.838 min,  $t_R$ (minor) = 13.543 min.)

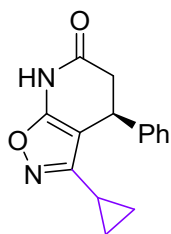

**4s**

White solid, 85% yield, 98% *ee*.

**<sup>1</sup>H NMR** (500 MHz, CDCl<sub>3</sub>) δ 8.61 (s, 1H), 7.39 – 7.33 (m, 2H), 7.33 – 7.28 (m, 1H), 7.24 – 7.19 (m, 2H), 4.20 (dd, *J* = 7.8, 6.0 Hz, 1H), 3.12 (dd, *J* = 16.6, 7.8 Hz, 1H), 2.86 (dd, *J* = 16.6, 5.9 Hz, 1H), 1.37 (tt, *J* = 8.4, 5.1 Hz, 1H), 0.93 – 0.69 (m, 4H).

**<sup>13</sup>C NMR** (126 MHz, CDCl<sub>3</sub>) δ 169.4, 164.3, 161.0, 141.5, 129.2, 127.8, 127.1, 94.8, 40.7, 34.1, 7.5, 7.5, 6.8.

**HRMS** (ESI): exact mass calculated for C<sub>15</sub>H<sub>15</sub>N<sub>2</sub>O<sub>2</sub> [M + H]<sup>+</sup> 255.1134, found 255.1128.

**m.p.** = 132-134 °C.

The *ee* value was determined by HPLC analysis on a Chiralcel IB column (*n*-hexane/isopropanol = 90/10, flow rate = 1.0 mL/min, λ = 254 nm, t<sub>R</sub>(major) = 13.633 min, t<sub>R</sub>(minor) = 16.834 min.)

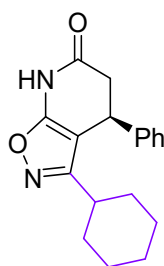

**4t**

White solid, 77% yield, 97% *ee*.

**<sup>1</sup>H NMR** (500 MHz, CDCl<sub>3</sub>) δ 8.67 (s, 1H), 7.38 – 7.32 (m, 2H), 7.32 – 7.26 (m, 1H), 7.18 – 7.13 (m, 2H), 4.17 (dd, *J* = 7.9, 5.0 Hz, 1H), 3.12 (dd, *J* = 16.5, 7.8 Hz, 1H), 2.84 (dd, *J* = 16.6, 5.0 Hz, 1H), 2.28 (tt, *J* = 12.0, 3.2 Hz, 1H), 1.83 – 1.55 (m, 5H), 1.50 – 1.39 (m, 1H), 1.34 – 1.04 (m, 4H).

**<sup>13</sup>C NMR** (126 MHz, CDCl<sub>3</sub>) δ 169.4, 166.5, 161.0, 141.6, 129.2, 127.8, 127.0, 93.8, 40.8, 36.3, 34.4, 31.5, 30.4, 26.2, 26.1, 25.8.

**HRMS** (ESI): exact mass calculated for C<sub>18</sub>H<sub>21</sub>N<sub>2</sub>O<sub>2</sub> [M + H]<sup>+</sup> 297.1606, found 297.1599.

**m.p.** = 151-153 °C.

The *ee* value was determined by HPLC analysis on a Chiralcel IG column (*n*-hexane/isopropanol = 90/10, flow rate = 1.0 mL/min, λ = 254 nm, t<sub>R</sub>(major) = 15.518 min, t<sub>R</sub>(minor) = 13.371 min.)

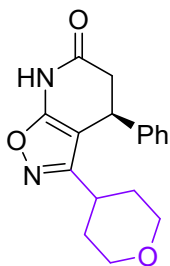

**4u**

White solid, 72% yield, 95% *ee*.

**<sup>1</sup>H NMR** (500 MHz, CDCl<sub>3</sub>) δ 8.84 (s, 1H), 7.37 – 7.27 (m, 3H), 7.16 – 7.11 (m, 2H), 4.16 (dd, *J* = 7.8, 5.2 Hz, 1H), 3.94 – 3.86 (m, 2H), 3.30 – 3.19 (m, 2H), 3.11 (dd, *J* = 16.6, 7.9 Hz, 1H), 2.82 (dd, *J* = 16.6, 5.2 Hz, 1H), 2.57 – 2.47 (m, 1H), 1.84 – 1.72 (m, 1H), 1.68 – 1.59 (m, 2H), 1.59 – 1.52 (m, 1H).

**<sup>13</sup>C NMR** (126 MHz, CDCl<sub>3</sub>) δ 169.2, 164.8, 161.5, 141.4, 129.4, 128.0, 127.0, 93.6, 67.6, 67.5, 40.8, 34.4, 33.6, 30.9, 30.1.

**HRMS** (ESI): exact mass calculated for C<sub>17</sub>H<sub>19</sub>N<sub>2</sub>O<sub>3</sub> [M + H]<sup>+</sup> 299.1398, found 299.1390.

**m.p.** = 159-161 °C.

The *ee* value was determined by HPLC analysis on a Chiralcel IB column (*n*-hexane/isopropanol = 90/10, flow rate = 1.0 mL/min, λ = 254 nm, t<sub>R</sub>(major) = 21.863 min, t<sub>R</sub>(minor) = 27.163 min.)

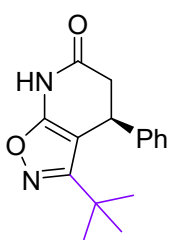

**4v**

White solid, 19% yield, 94% *ee*.

**<sup>1</sup>H NMR** (500 MHz, CDCl<sub>3</sub>) δ 7.93 (s, 1H), 7.26 – 7.19 (m, 2H), 7.19 – 7.11 (m, 1H), 7.01 – 6.96 (m, 2H), 4.21 – 4.16 (m, 1H), 3.09 (dd, *J* = 16.2, 8.2 Hz, 1H), 2.70 (dd, *J* = 16.2, 1.6 Hz, 1H), 1.10 (s, 9H).

$^{13}\text{C}$  NMR (126 MHz,  $\text{CDCl}_3$ )  $\delta$  169.4, 168.4, 161.8, 141.8, 129.3, 127.7, 126.8, 93.4, 41.2, 35.0, 33.4, 28.9.

**HRMS** (ESI): exact mass calculated for  $\text{C}_{16}\text{H}_{19}\text{N}_2\text{O}_2$   $[\text{M} + \text{H}]^+$  271.1448, found 271.1441.

**m.p.** = 165-167 °C.

The *ee* value was determined by HPLC analysis on a Chiralcel IG column (*n*-hexane/isopropanol = 90/10, flow rate = 1.0 mL/min,  $\lambda$  = 254 nm,  $t_{\text{R}}$ (major) = 12.757 min,  $t_{\text{R}}$ (minor) = 10.385 min.)

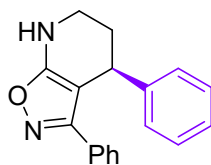

**5**

White solid, 65% yield, 97% *ee*.

$^1\text{H}$  NMR (500 MHz,  $\text{CDCl}_3$ )  $\delta$  7.48 – 7.43 (m, 2H), 7.32 – 7.16 (m, 8H), 4.82 (s, 1H), 4.20 (dd,  $J$  = 5.5, 2.9 Hz, 1H), 3.31 (dt,  $J$  = 12.0, 3.8 Hz, 1H), 3.18 (td,  $J$  = 11.8, 2.8 Hz, 1H), 2.13 (dddd,  $J$  = 13.6, 11.8, 5.5, 3.9 Hz, 1H), 1.93 (dq,  $J$  = 13.5, 3.1 Hz, 1H).

$^{13}\text{C}$  NMR (126 MHz,  $\text{CDCl}_3$ )  $\delta$  167.5, 161.3, 145.1, 129.9, 129.3, 128.63, 128.55, 128.1, 127.6, 126.7, 88.4, 38.1, 36.3, 31.8.

**HRMS** (ESI): exact mass calculated for  $\text{C}_{18}\text{H}_{17}\text{N}_2\text{O}$   $[\text{M} + \text{H}]^+$  277.1335, found 277.1332.

**m.p.** = 167-169 °C.

The *ee* value was determined by HPLC analysis on a Chiralcel IG column (*n*-hexane/isopropanol = 80/20, flow rate = 1.0 mL/min,  $\lambda$  = 254 nm,  $t_{\text{R}}$ (major) = 12.429 min,  $t_{\text{R}}$ (minor) = 19.025 min.)

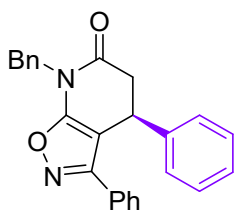

**6**

Colorless oil, 87% yield, 97% *ee*.

**<sup>1</sup>H NMR** (500 MHz, CDCl<sub>3</sub>) δ 7.44 (dt, *J* = 8.4, 2.2 Hz, 4H), 7.38 – 7.25 (m, 6H), 7.22 – 7.14 (m, 3H), 6.94 (dd, *J* = 6.5, 2.9 Hz, 2H), 5.24 (d, *J* = 14.6 Hz, 1H), 4.98 (d, *J* = 14.6 Hz, 1H), 4.22 (dd, *J* = 7.9, 2.4 Hz, 1H), 3.19 (dd, *J* = 16.0, 7.9 Hz, 1H), 2.92 (dd, *J* = 16.1, 2.4 Hz, 1H).  
**<sup>13</sup>C NMR** (126 MHz, CDCl<sub>3</sub>) δ 167.6, 164.0, 161.1, 141.0, 136.0, 130.1, 129.3, 128.9, 128.9, 128.8, 128.5, 128.2, 127.6, 127.5, 126.8, 94.8, 45.1, 41.6, 33.6.

**HRMS** (ESI): exact mass calculated for C<sub>25</sub>H<sub>21</sub>N<sub>2</sub>O<sub>2</sub> [M + H]<sup>+</sup> 381.1598, found 381.1593.

The *ee* value was determined by HPLC analysis on a Chiralcel IA column (*n*-hexane/isopropanol = 70/30, flow rate = 1.0 mL/min, λ = 254 nm, t<sub>R</sub>(major) = 6.004 min, t<sub>R</sub>(minor) = 9.165 min.)

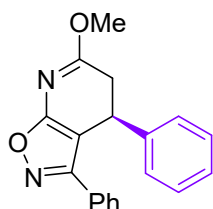

**7**

Colorless oil, 90% yield, 96% *ee*.

**<sup>1</sup>H NMR** (500 MHz, CDCl<sub>3</sub>) δ 7.39 (t, *J* = 7.5 Hz, 1H), 7.30 (t, *J* = 7.6 Hz, 2H), 7.18 – 7.06 (m, 5H), 7.03 – 6.98 (m, 2H), 4.10 (dd, *J* = 7.8, 4.2 Hz, 1H), 3.34 (s, 3H), 2.82 (dd, *J* = 15.5, 7.8 Hz, 1H), 2.60 (dd, *J* = 15.5, 4.3 Hz, 1H).

**<sup>13</sup>C NMR** (126 MHz, CDCl<sub>3</sub>) δ 180.5, 180.0, 160.3, 141.9, 131.6, 129.3, 129.0, 128.4, 127.4, 126.7, 125.5, 102.0, 40.8, 39.0, 35.0.

**HRMS** (ESI): exact mass calculated for C<sub>19</sub>H<sub>17</sub>N<sub>2</sub>O<sub>2</sub> [M + H]<sup>+</sup> 305.1285, found 305.1280.

The *ee* value was determined by HPLC analysis on a Chiralcel ID column (*n*-hexane/isopropanol = 60/40, flow rate = 1.0 mL/min, λ = 254 nm, t<sub>R</sub>(major) = 33.340 min, t<sub>R</sub>(minor) = 46.483 min.)

## 5. X-Ray Diffraction Data

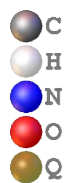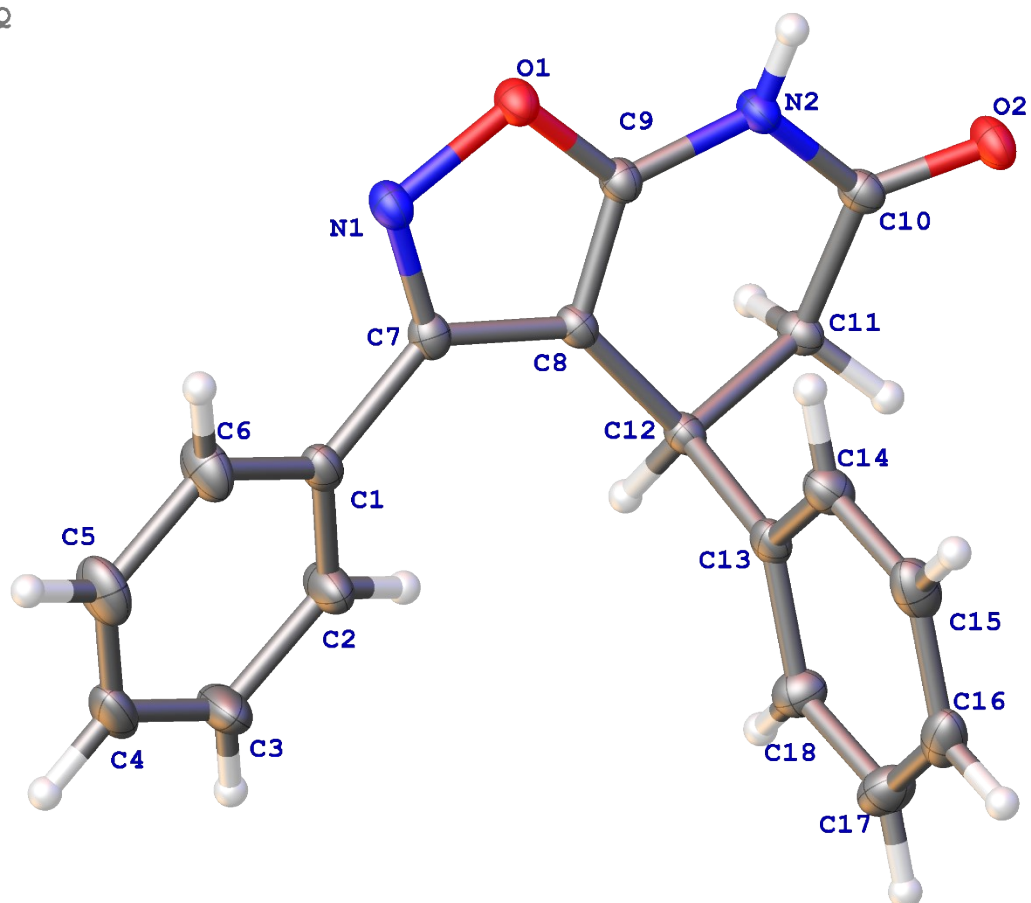

**Table 1 Crystal data and structure refinement for 3a.**

|                       |                                                               |
|-----------------------|---------------------------------------------------------------|
| Identification code   | 3a                                                            |
| Empirical formula     | C <sub>18</sub> H <sub>14</sub> N <sub>2</sub> O <sub>2</sub> |
| Formula weight        | 290.31                                                        |
| Temperature/K         | 149.99(10)                                                    |
| Crystal system        | monoclinic                                                    |
| Space group           | I2                                                            |
| a/Å                   | 8.5336(3)                                                     |
| b/Å                   | 6.6348(2)                                                     |
| c/Å                   | 25.9444(9)                                                    |
| α/°                   | 90                                                            |
| β/°                   | 97.641(3)                                                     |
| γ/°                   | 90                                                            |
| Volume/Å <sup>3</sup> | 1455.89(8)                                                    |



|                                                |                                                               |
|------------------------------------------------|---------------------------------------------------------------|
| Z                                              | 4                                                             |
| $\rho_{\text{calc}}/\text{cm}^3$               | 1.324                                                         |
| $\mu/\text{mm}^{-1}$                           | 0.709                                                         |
| F(000)                                         | 608.0                                                         |
| Crystal size/ $\text{mm}^3$                    | $0.14 \times 0.1 \times 0.08$                                 |
| Radiation                                      | Cu K $\alpha$ ( $\lambda = 1.54184$ )                         |
| $2\Theta$ range for data collection/ $^\circ$  | 6.876 to 142.694                                              |
| Index ranges                                   | $-10 \leq h \leq 10, -7 \leq k \leq 5, -31 \leq l \leq 21$    |
| Reflections collected                          | 3176                                                          |
| Independent reflections                        | 1806 [ $R_{\text{int}} = 0.0171, R_{\text{sigma}} = 0.0226$ ] |
| Data/restraints/parameters                     | 1806/1/203                                                    |
| Goodness-of-fit on $F^2$                       | 1.052                                                         |
| Final R indexes [ $I \geq 2\sigma(I)$ ]        | $R_1 = 0.0328, wR_2 = 0.0865$                                 |
| Final R indexes [all data]                     | $R_1 = 0.0335, wR_2 = 0.0876$                                 |
| Largest diff. peak/hole / $e \text{ \AA}^{-3}$ | 0.19/-0.18                                                    |
| Flack parameter                                | -0.1(2)                                                       |

## 6. References

1. M. Lang and J. Wang, N-Heterocyclic Carbene-Catalyzed Enantioselective  $\beta$ -Amination of  $\alpha$ -Bromoaldehydes Enabled by a Proton-Shuttling Strategy, *Eur. J. Org. Chem.*, 2018, **2018**, 2958.
2. Y. Ge, W. Sun, Y. Chen, Y. Huang, Z. Liu, Y. Jiang and T.-P. Loh, Reactions of 5-Aminoisoxazoles with  $\alpha$ -Diazocarbonyl Compounds: Wolff Rearrangement vs N-H Insertion, *J. Org. Chem.* 2019, **84**, 2676.

## 7. Copies of NMR Spectra

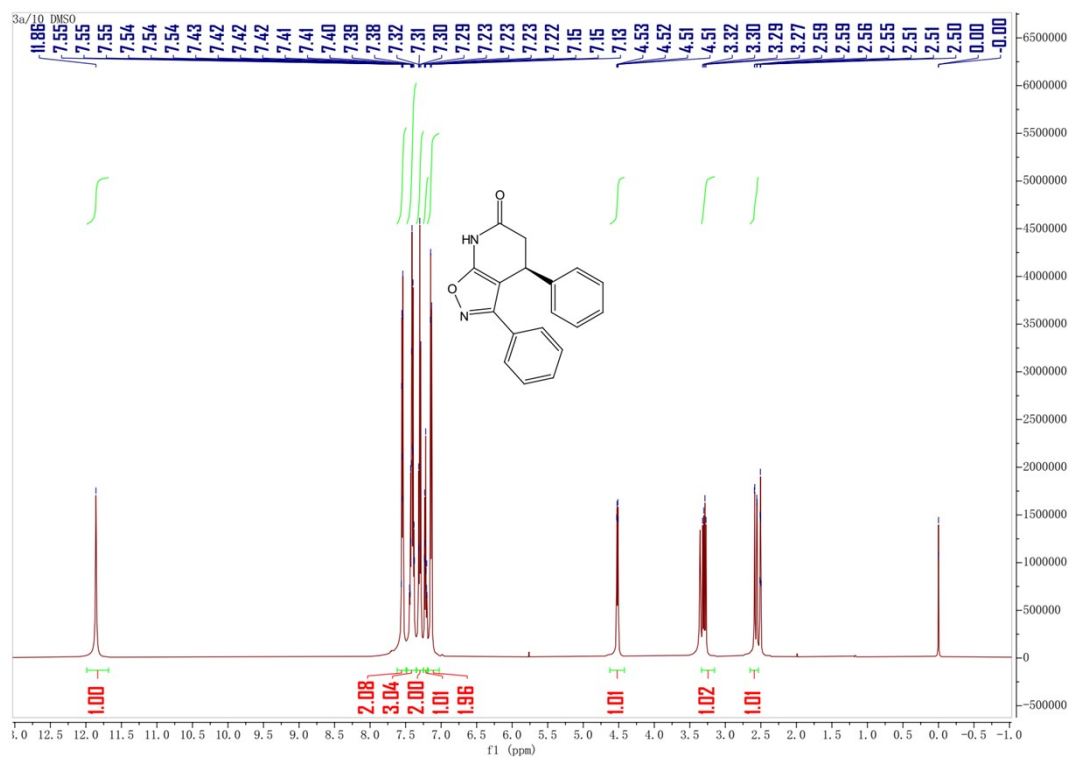

$^1\text{H}$  NMR spectrum of **3a**

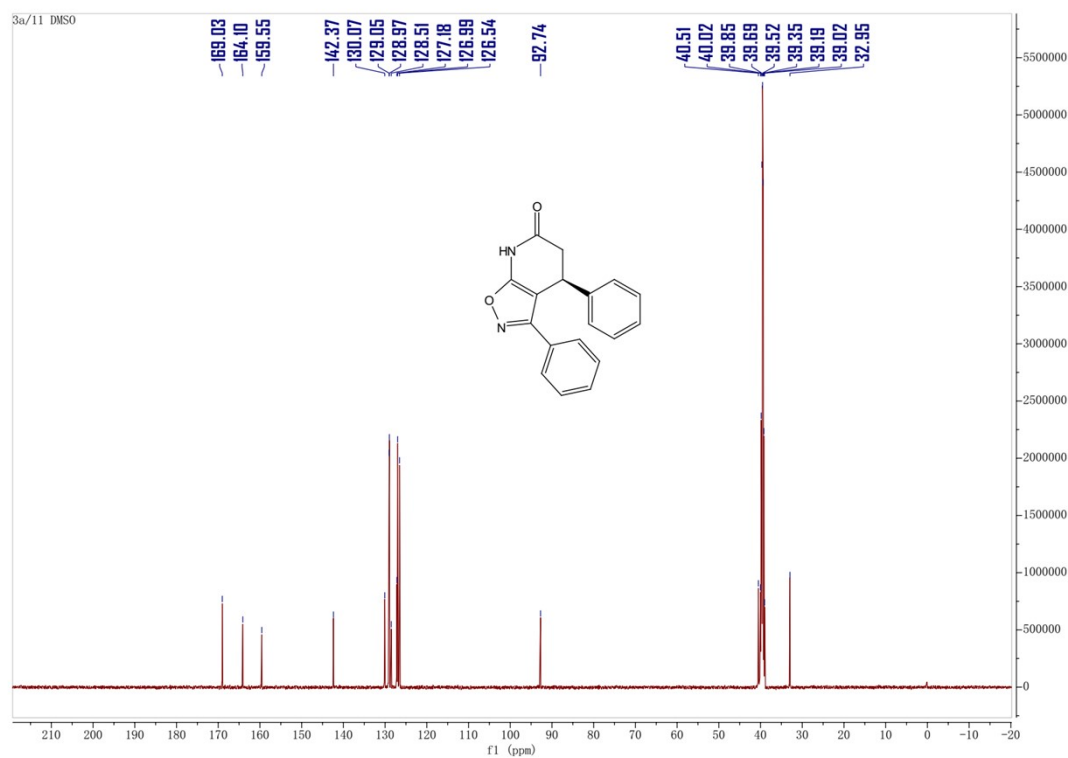

$^{13}\text{C}$  NMR spectrum of **3a**

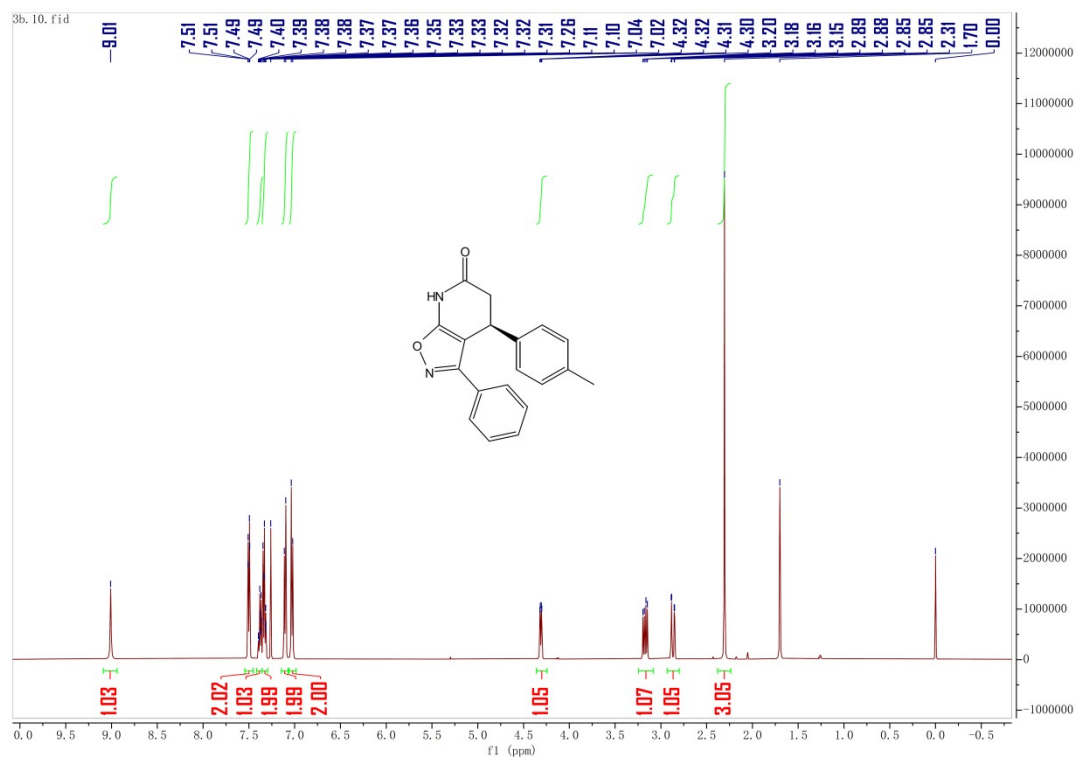

$^1\text{H NMR}$  spectrum of **3b**

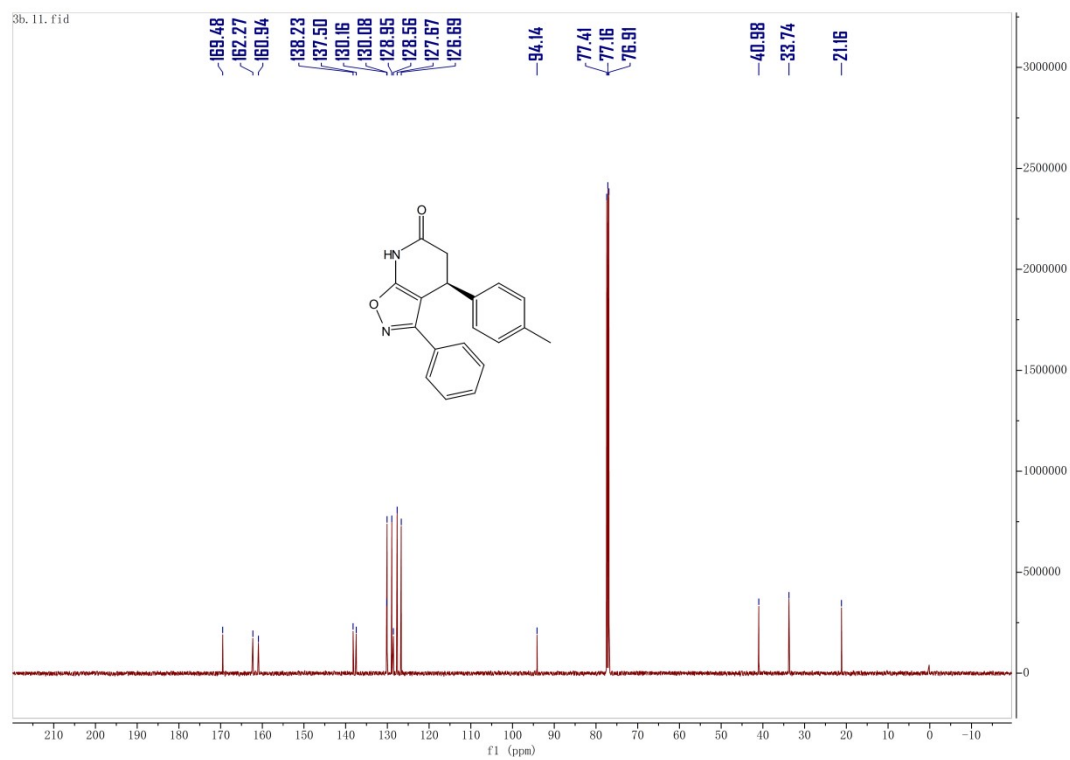

$^{13}\text{C NMR}$  spectrum of **3b**

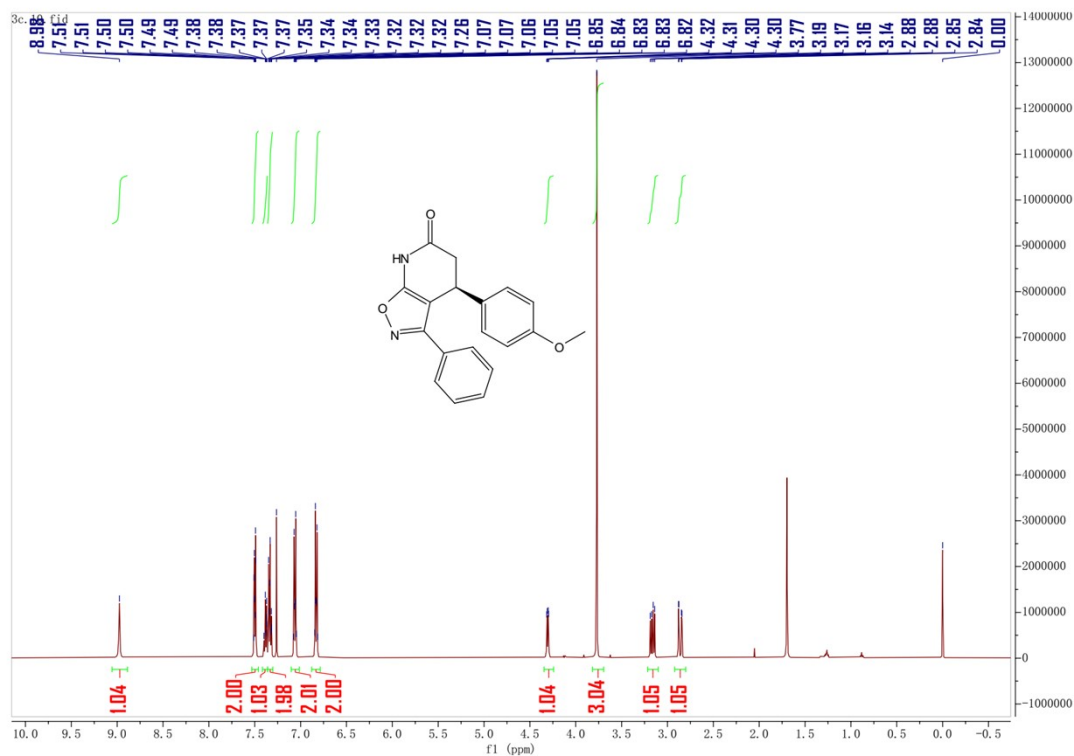

$^1\text{H}$  NMR spectrum of **3c**

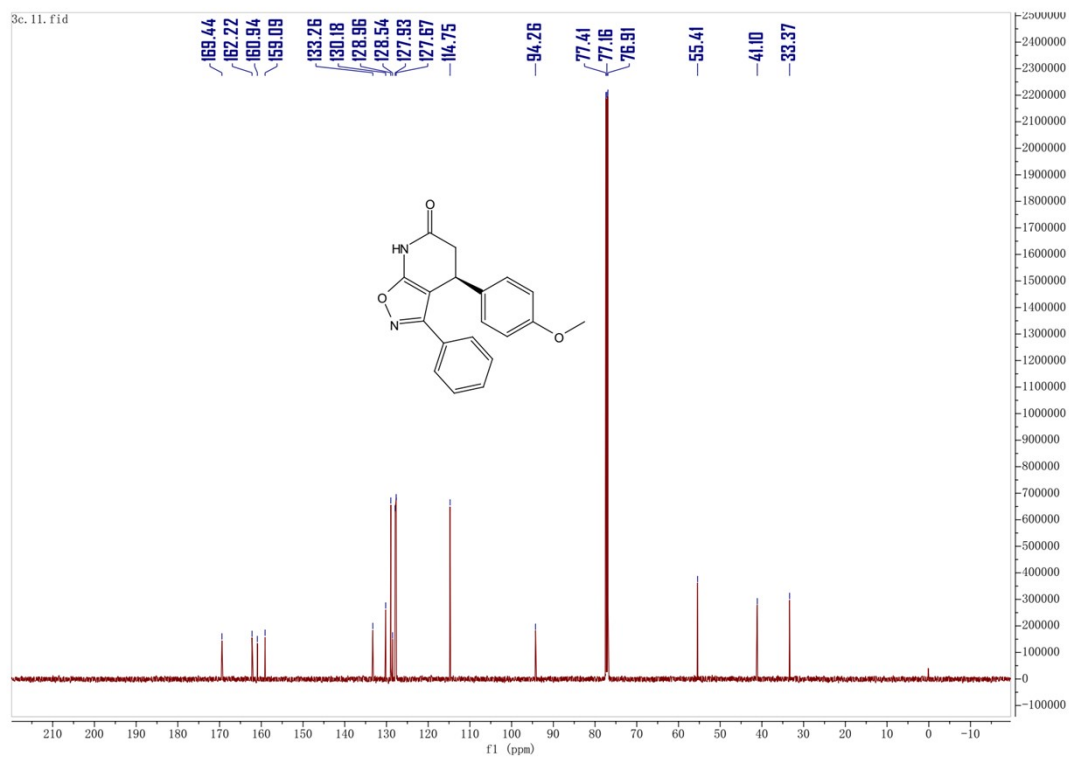

$^{13}\text{C}$  NMR spectrum of **3c**

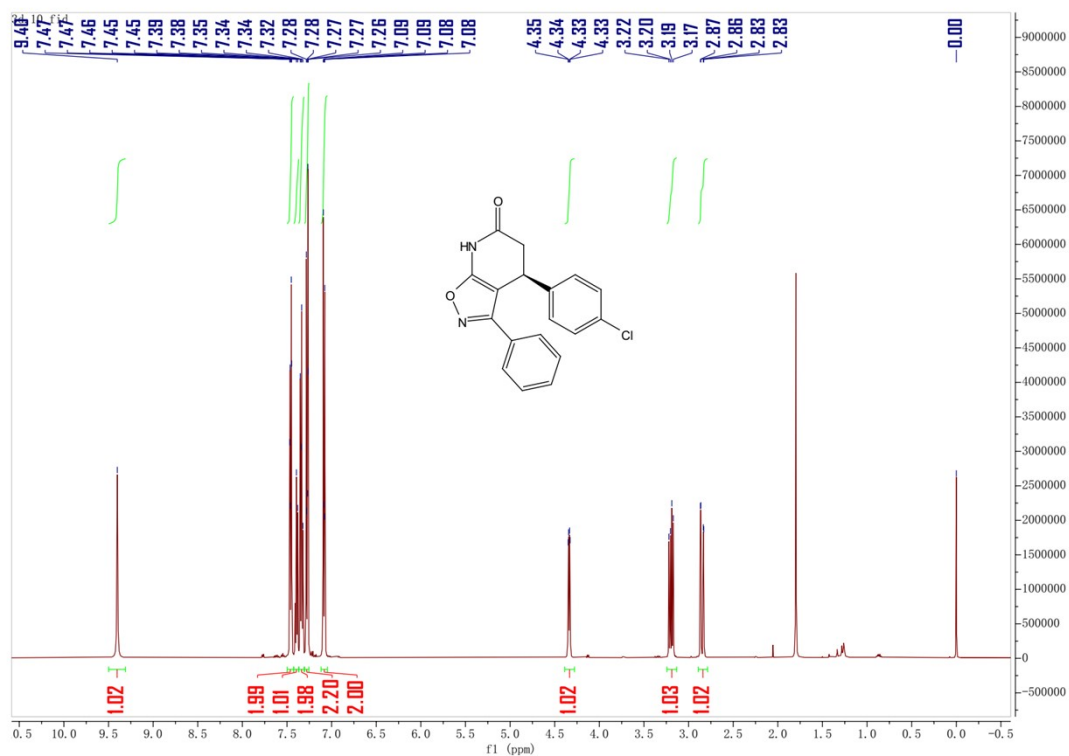

<sup>1</sup>H NMR spectrum of 3d

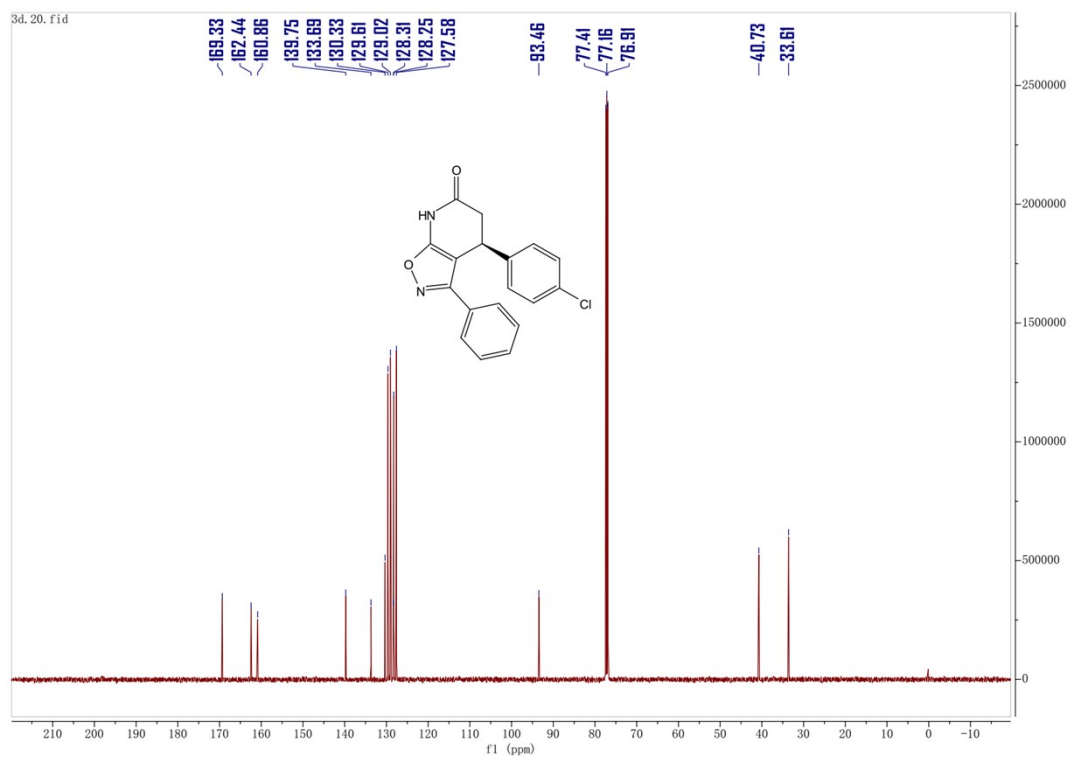

<sup>13</sup>C NMR spectrum of 3d

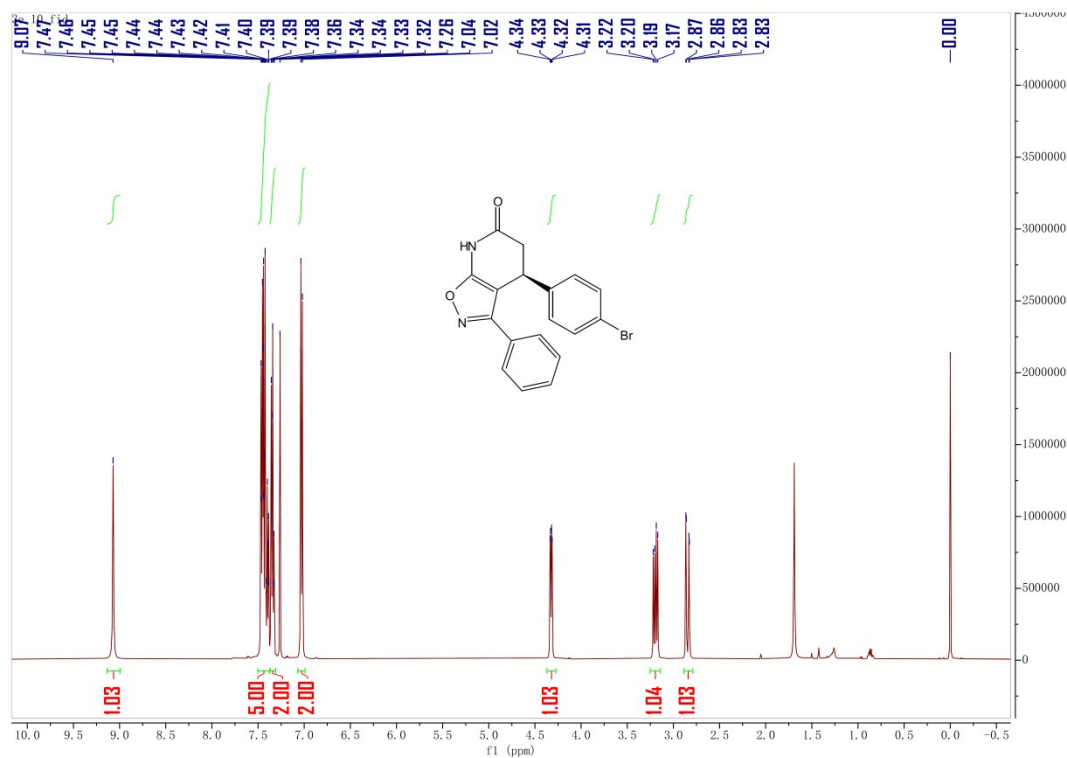

<sup>1</sup>H NMR spectrum of 3e

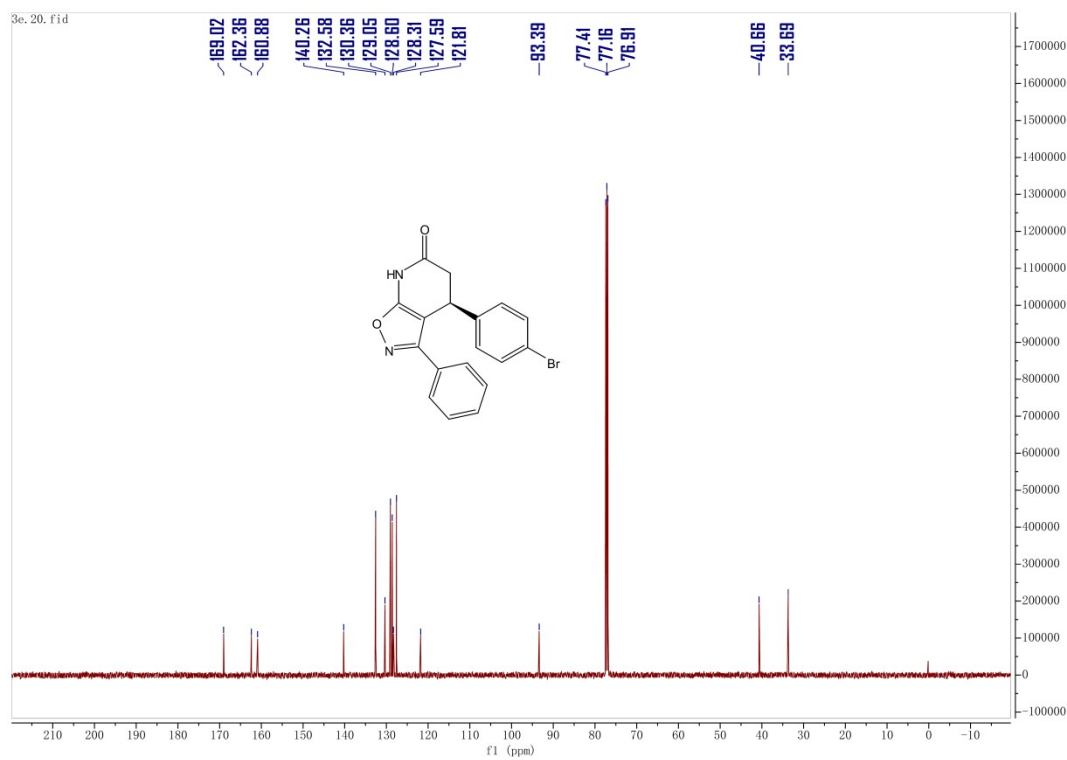

<sup>13</sup>C NMR spectrum of 3e

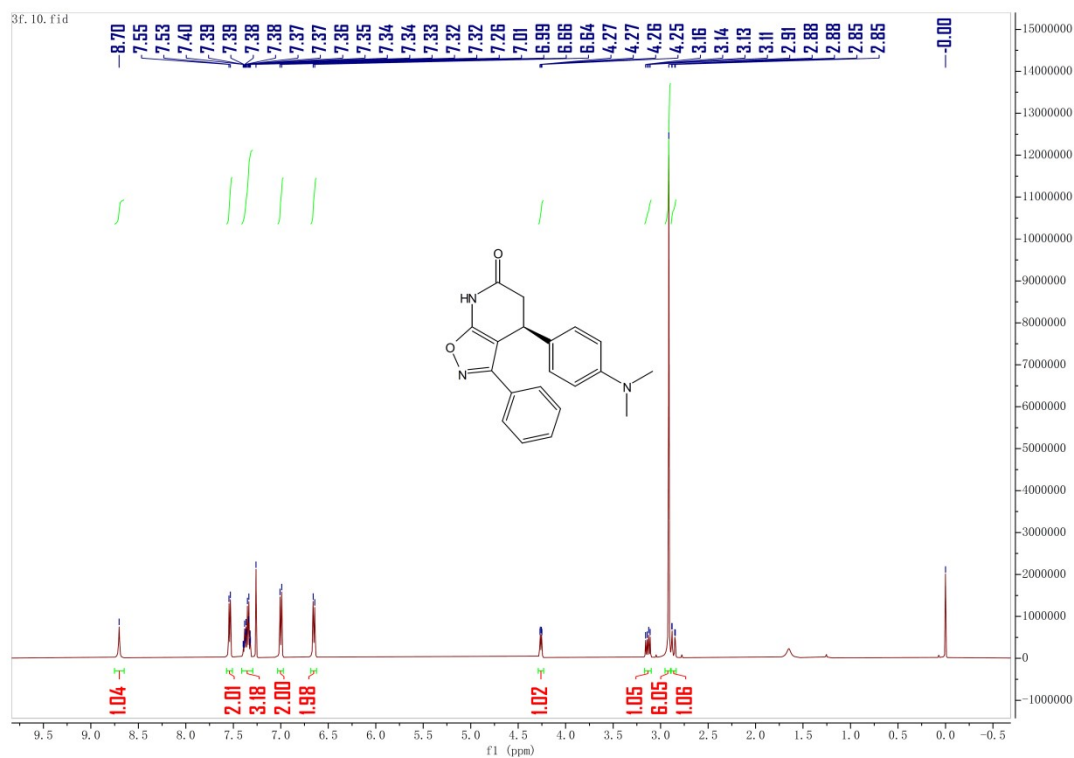

$^1\text{H}$  NMR spectrum of **3f**

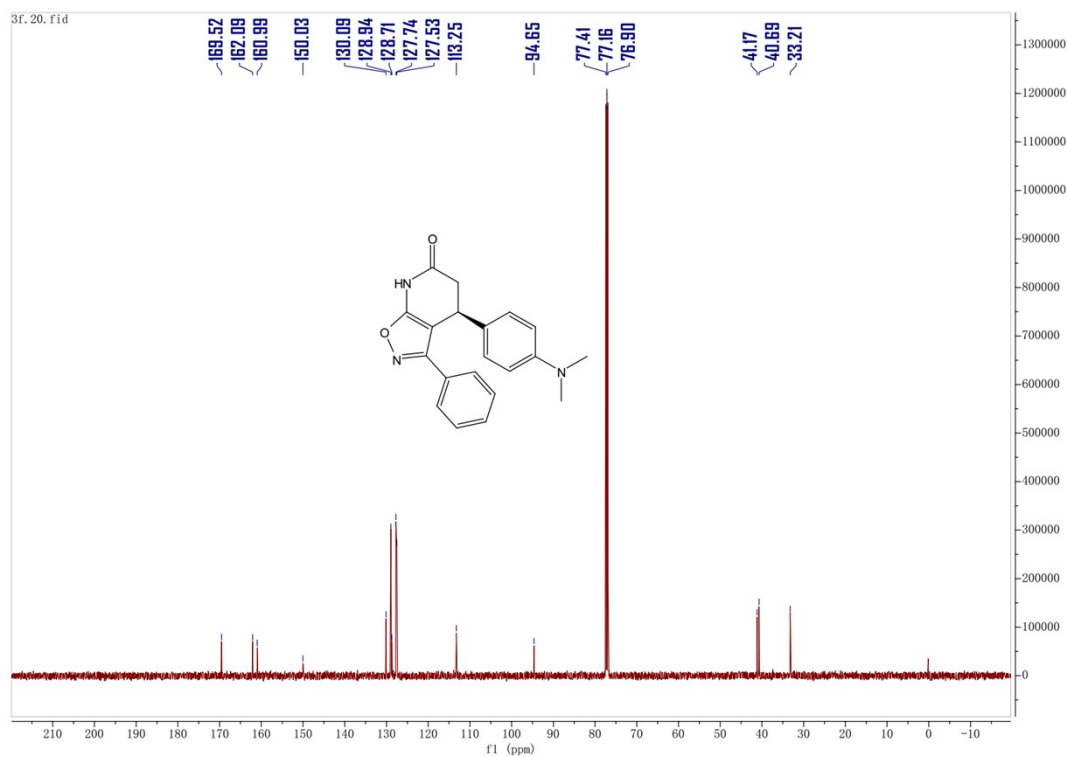

$^{13}\text{C}$  NMR spectrum of **3f**



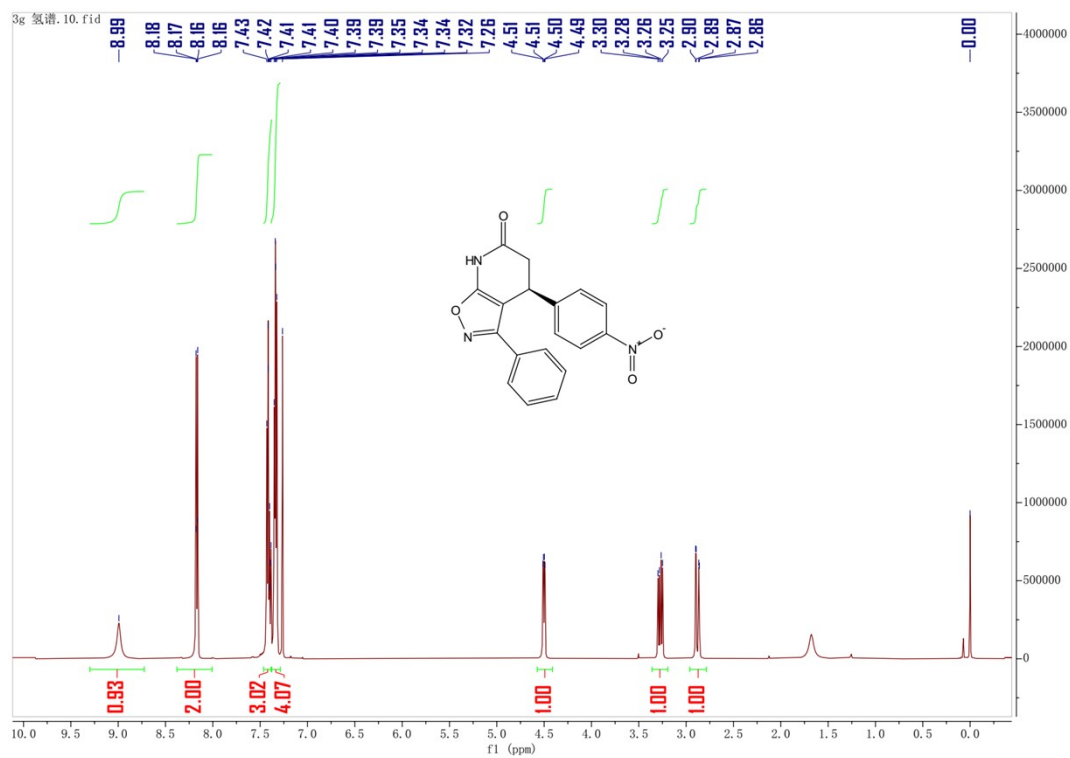

$^1\text{H}$  NMR spectrum of **3g**

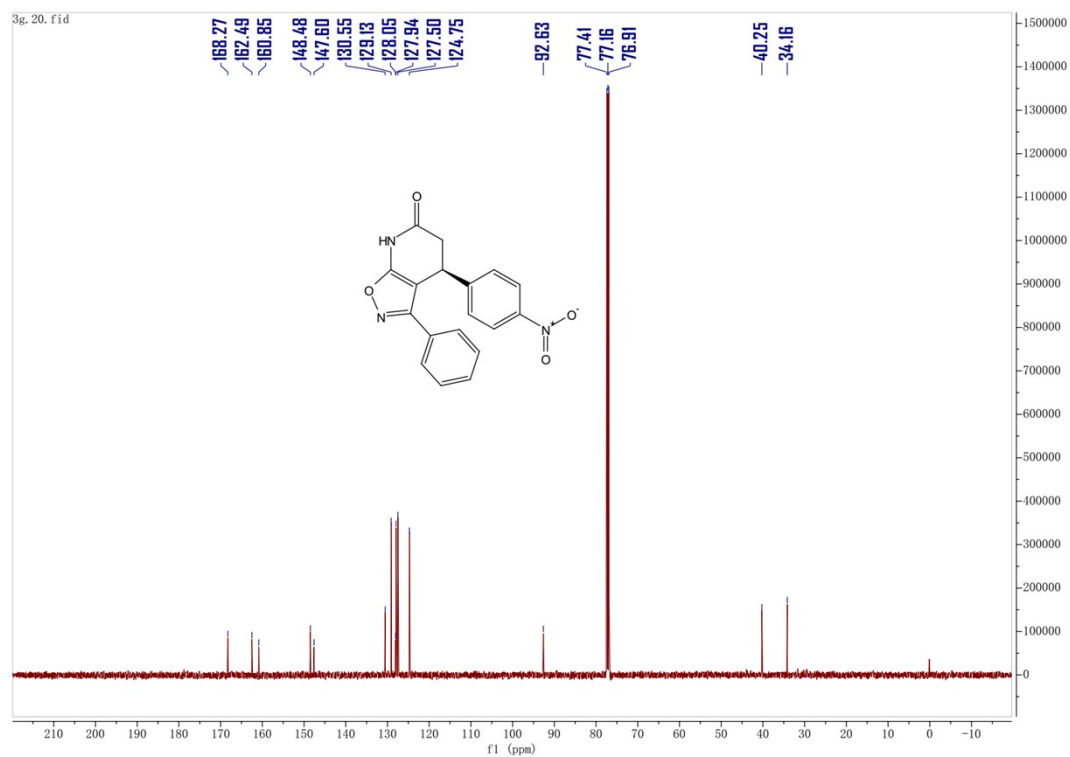

$^{13}\text{C}$  NMR spectrum of **3g**

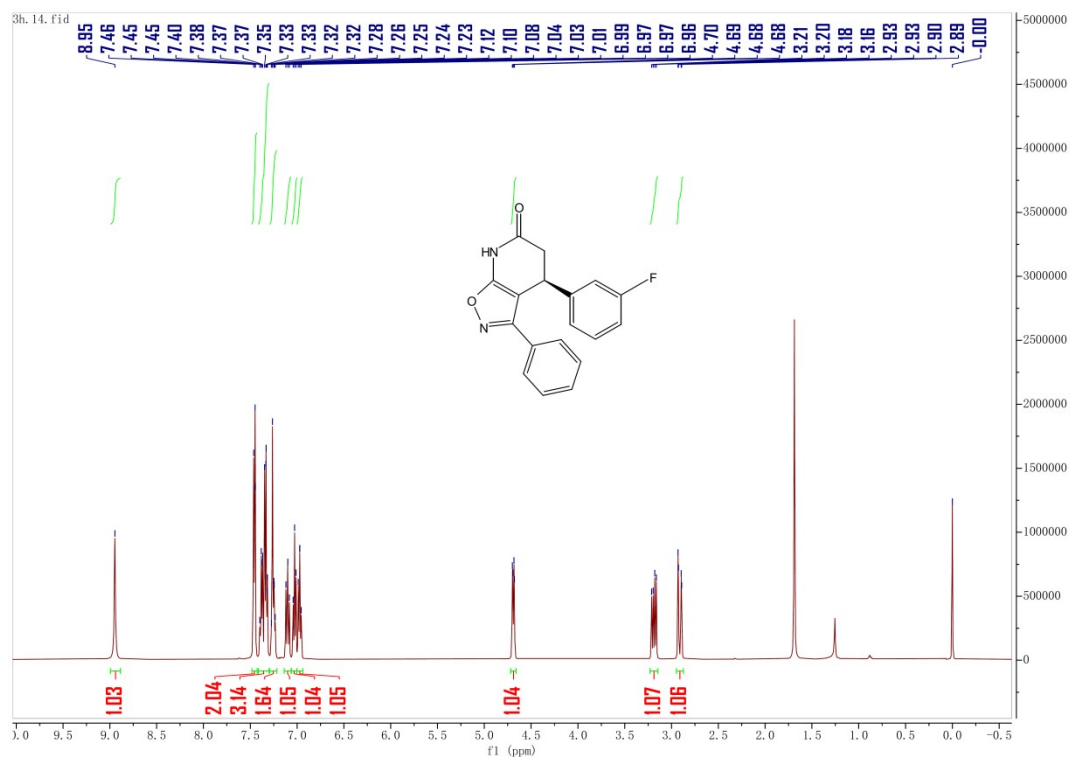

$^1\text{H}$  NMR spectrum of **3h**

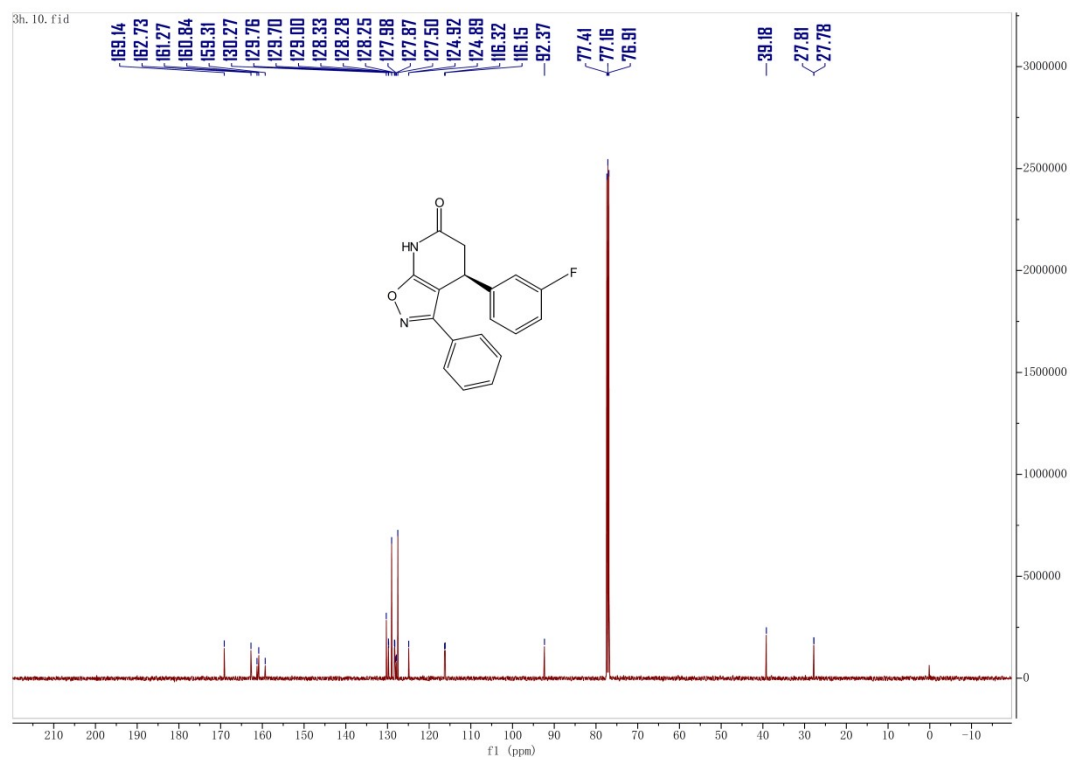

$^{13}\text{C}$  NMR spectrum of **3h**

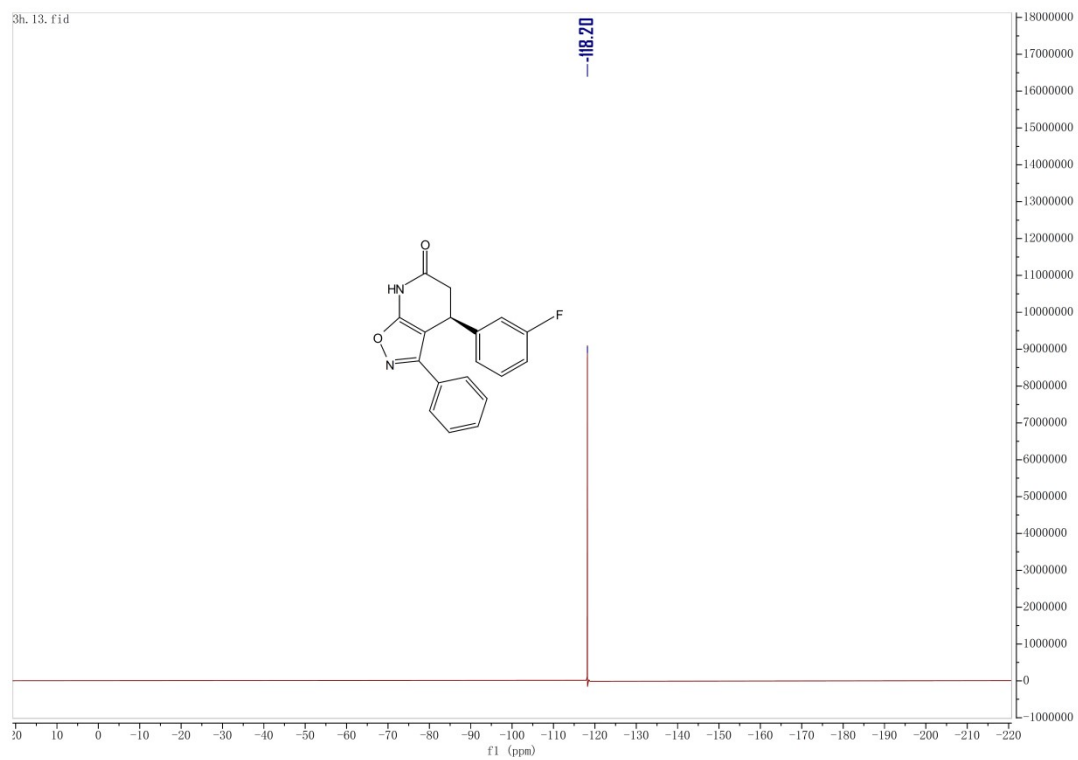

$^{19}\text{F}$  NMR spectrum of **3h**

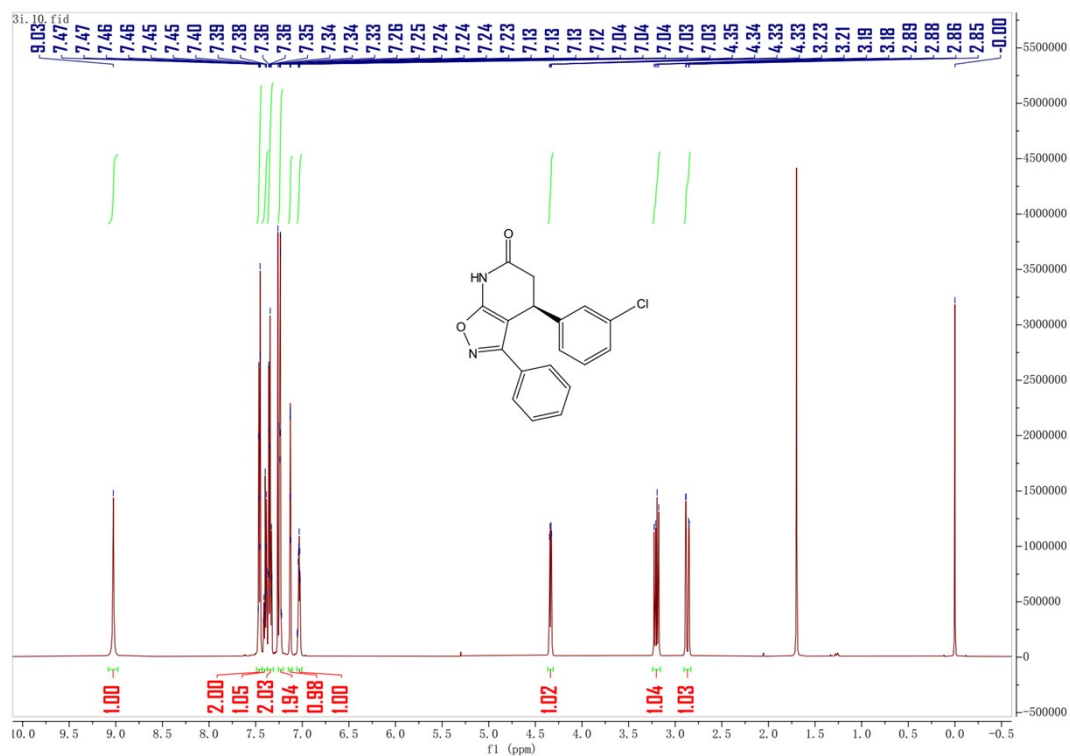

<sup>1</sup>H NMR spectrum of **3i**

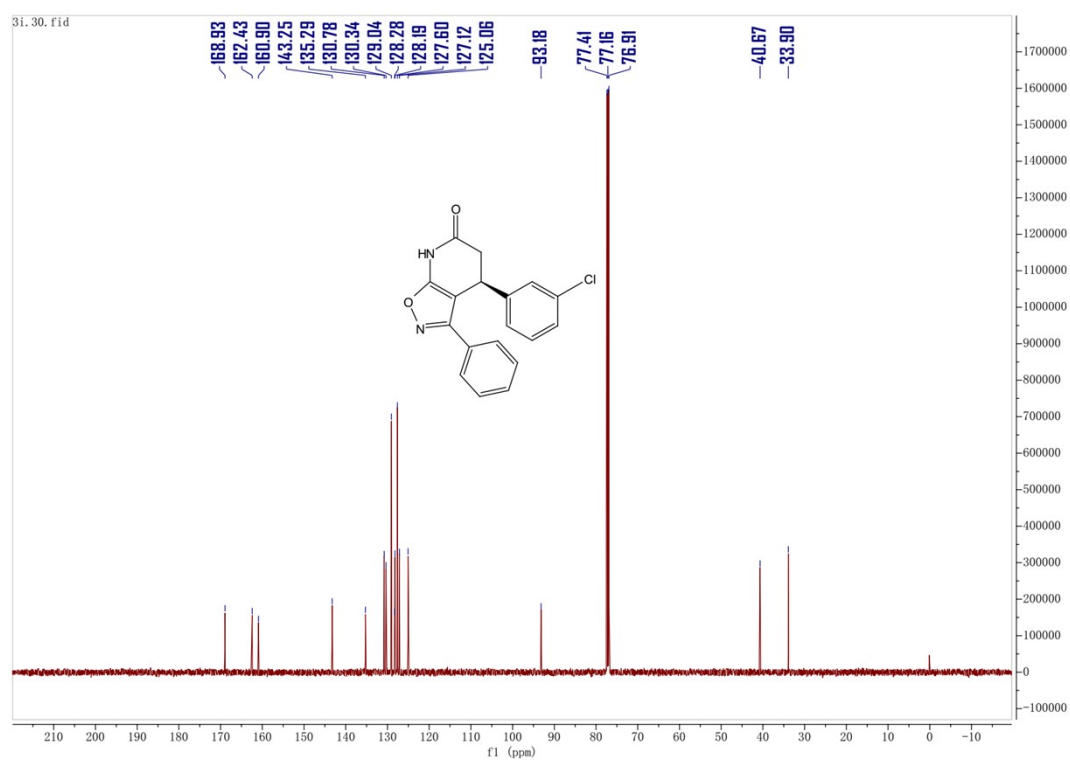

<sup>13</sup>C NMR spectrum of **3i**

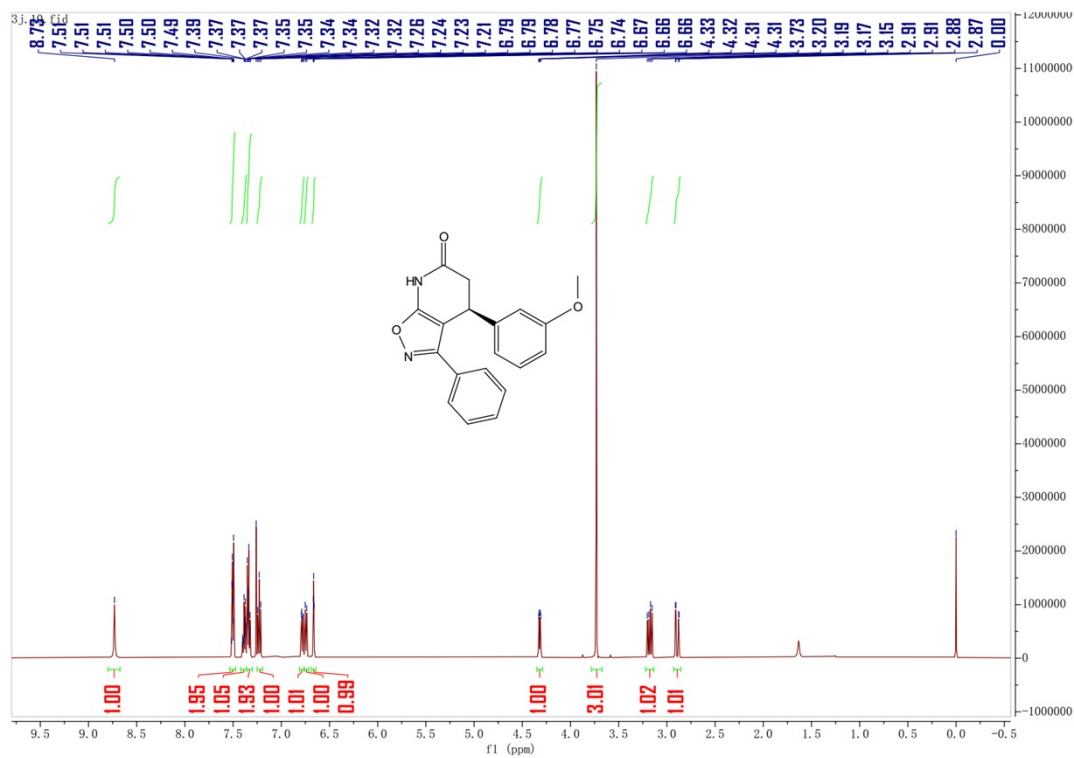

$^1\text{H}$  NMR spectrum of **3j**

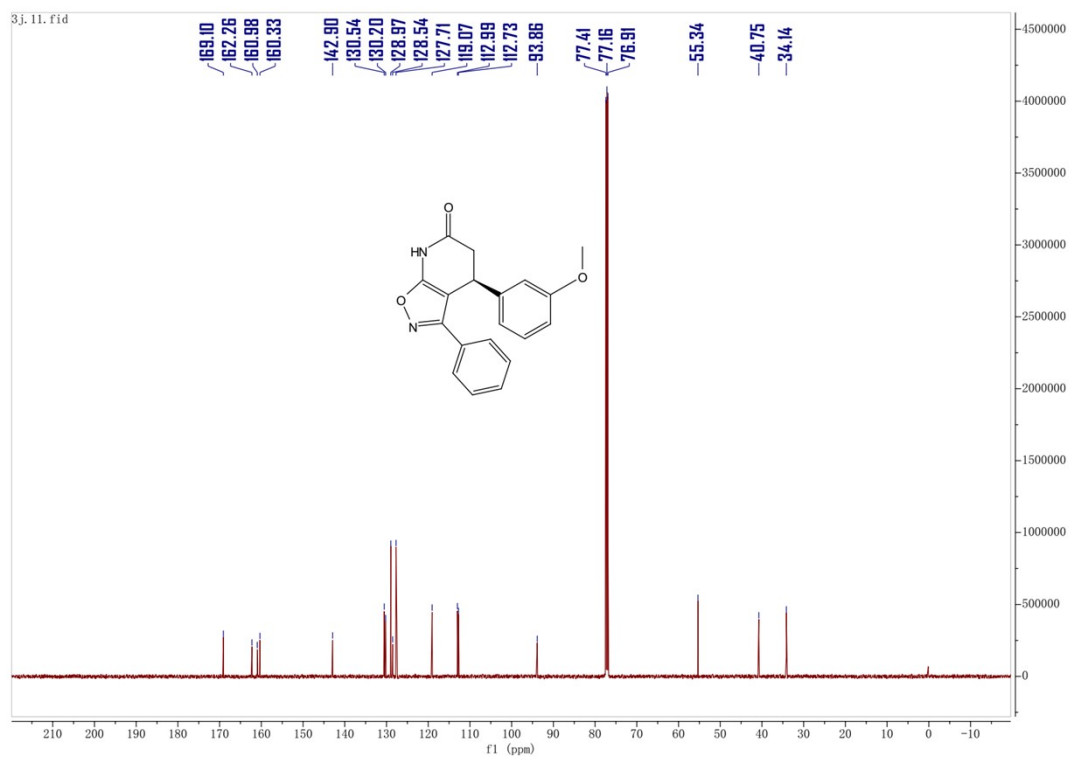

$^{13}\text{C}$  NMR spectrum of **3j**

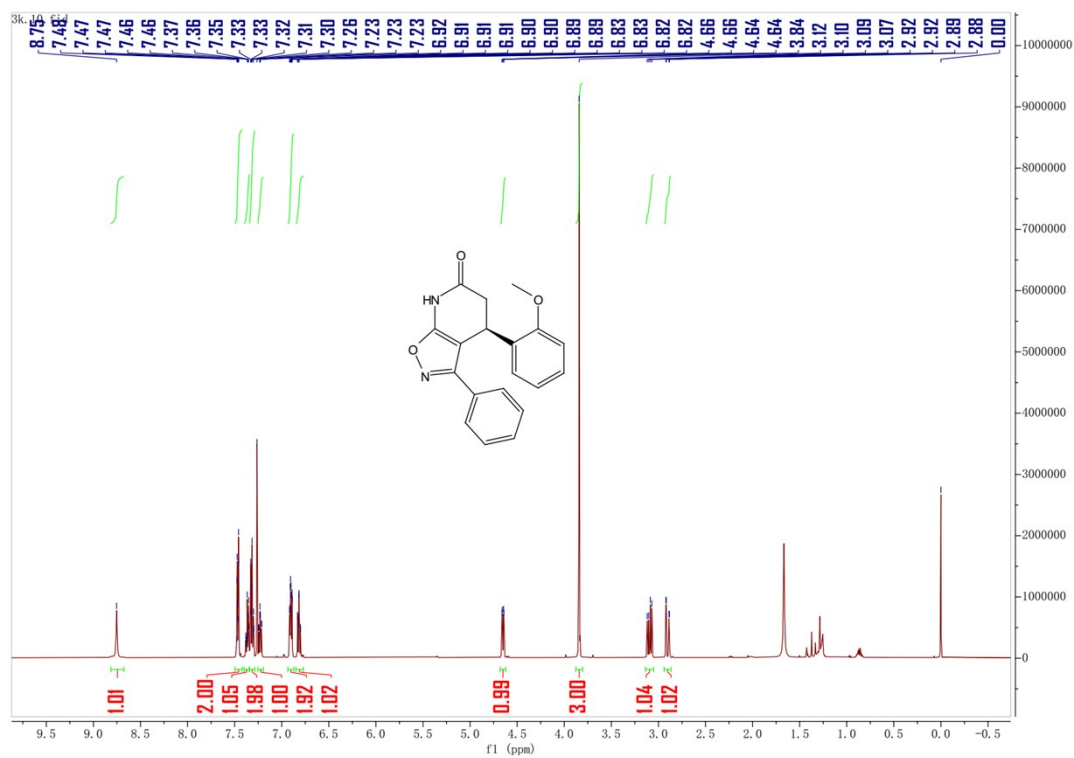

$^1\text{H}$  NMR spectrum of **3k**

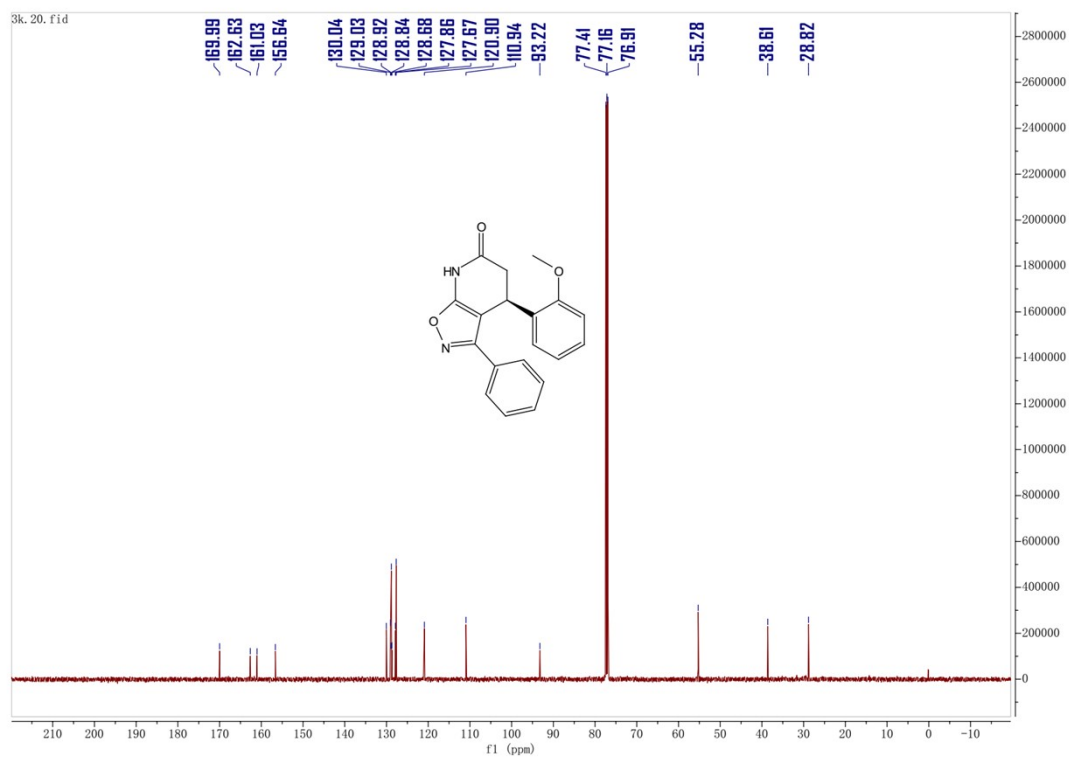

$^{13}\text{C}$  NMR spectrum of **3k**

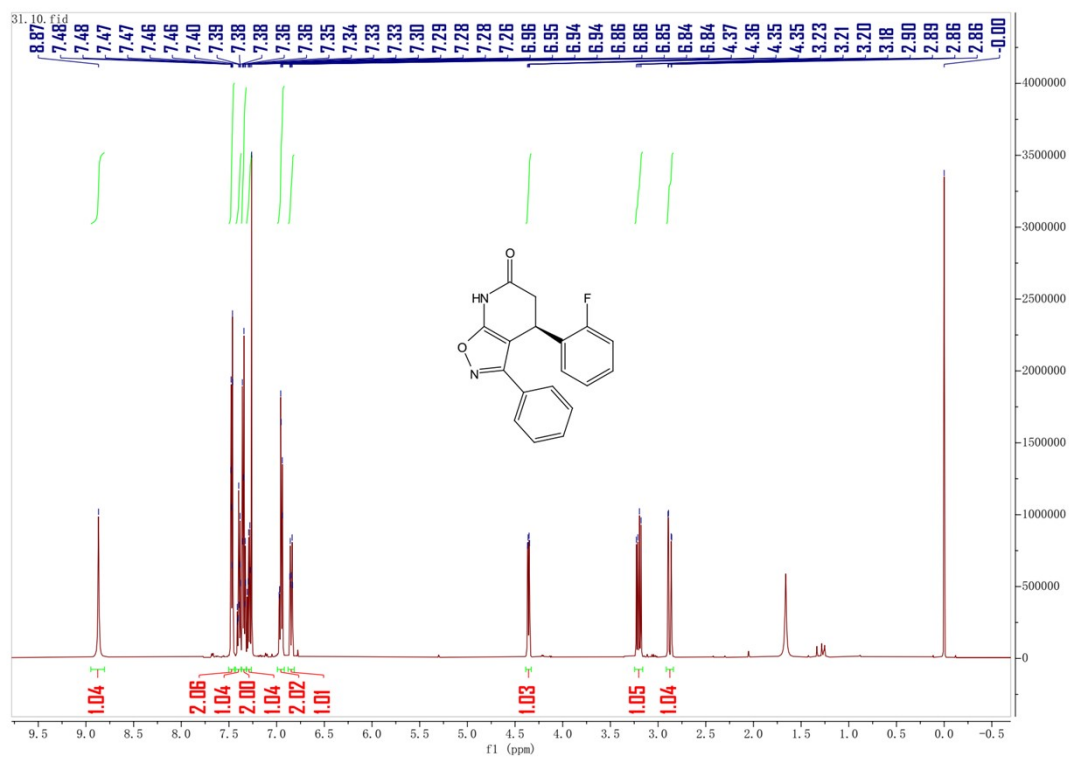

<sup>1</sup>H NMR spectrum of **31**

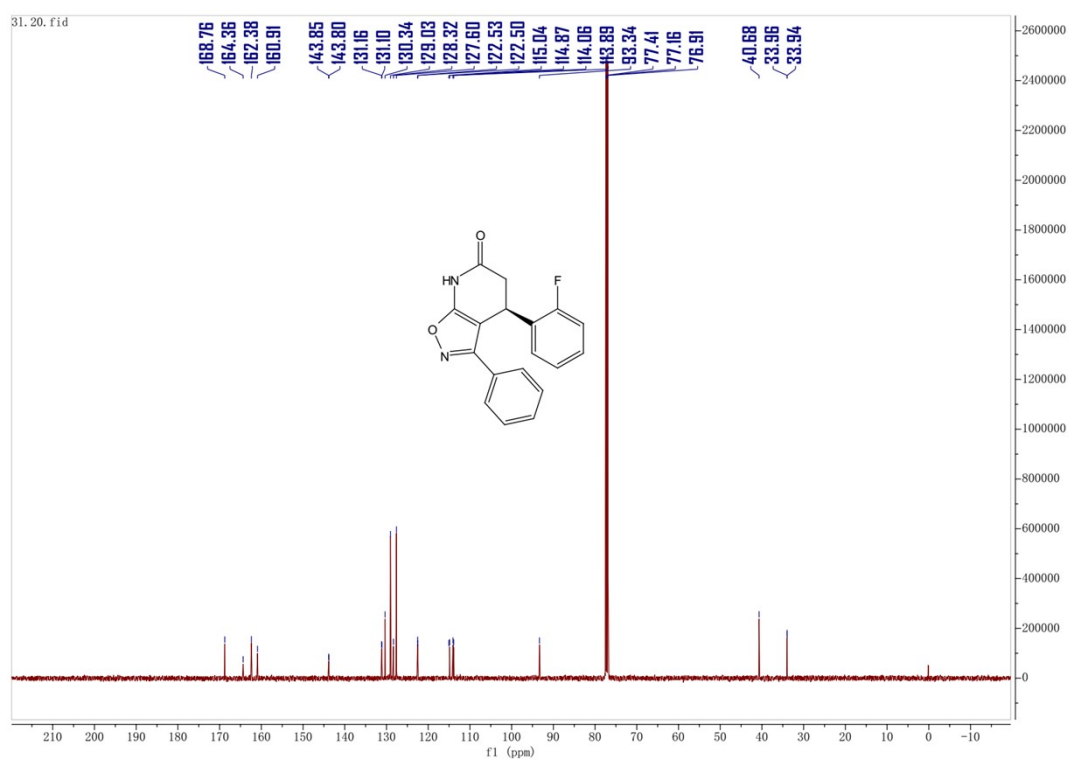

<sup>13</sup>C NMR spectrum of **31**

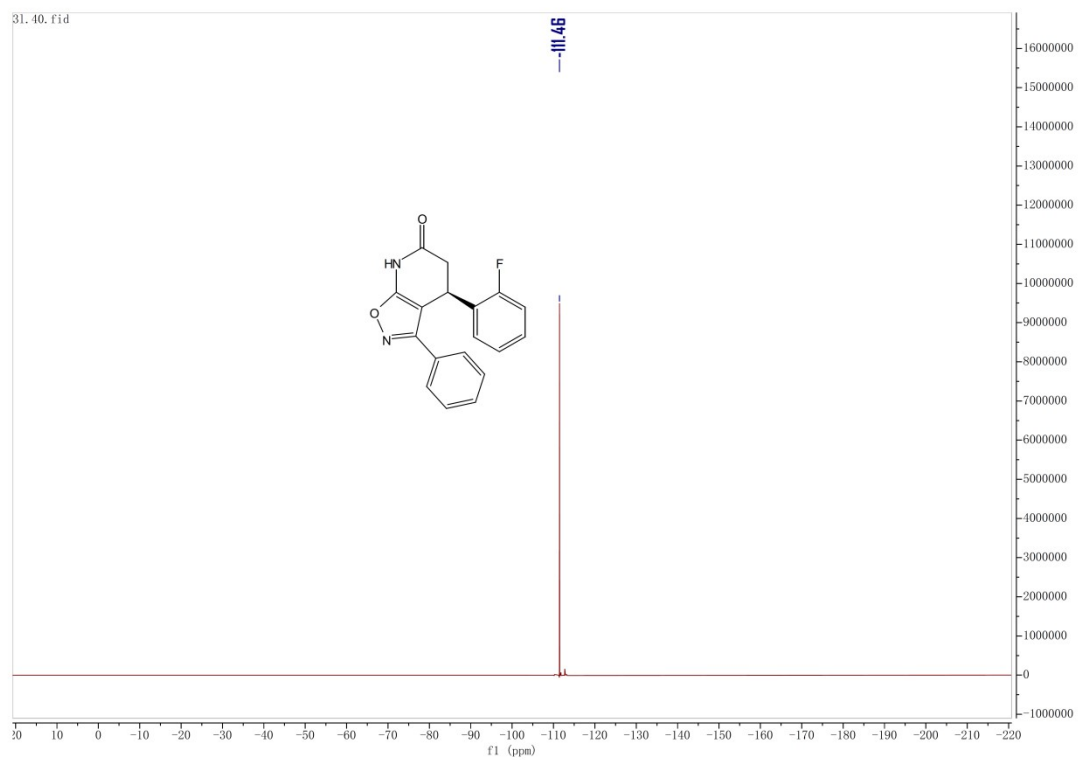

$^{19}\text{F}$  NMR spectrum of **31**



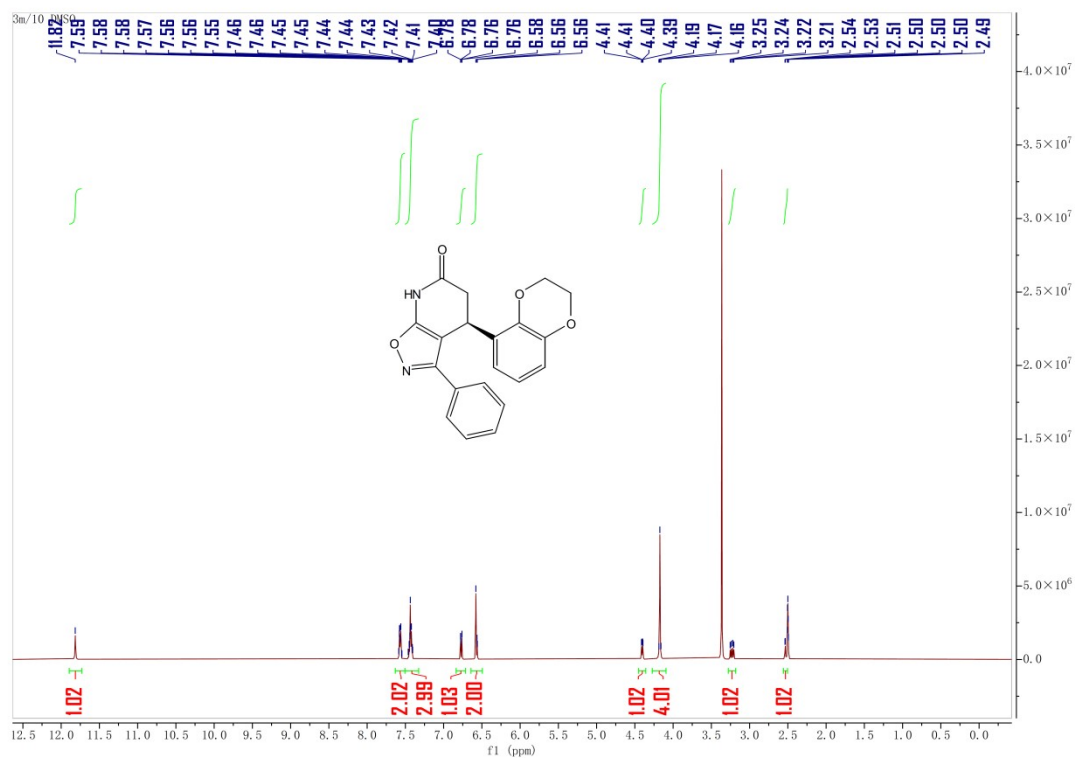

$^1\text{H}$  NMR spectrum of **3m**

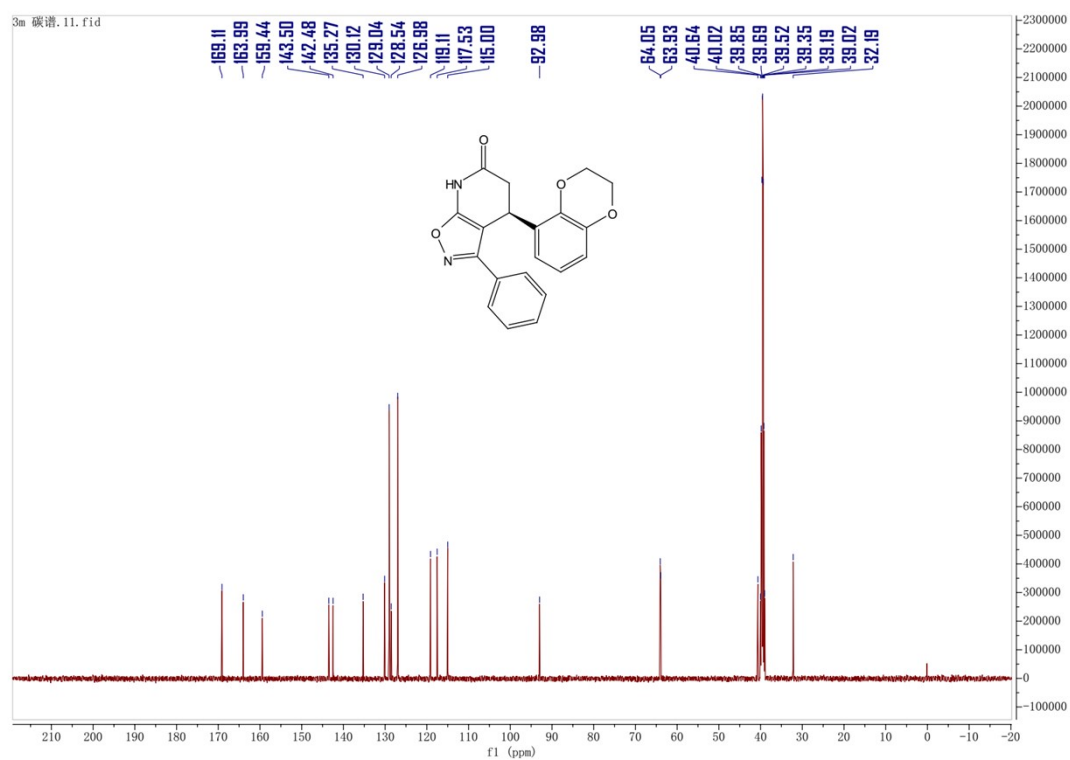

$^{13}\text{C}$  NMR spectrum of **3m**

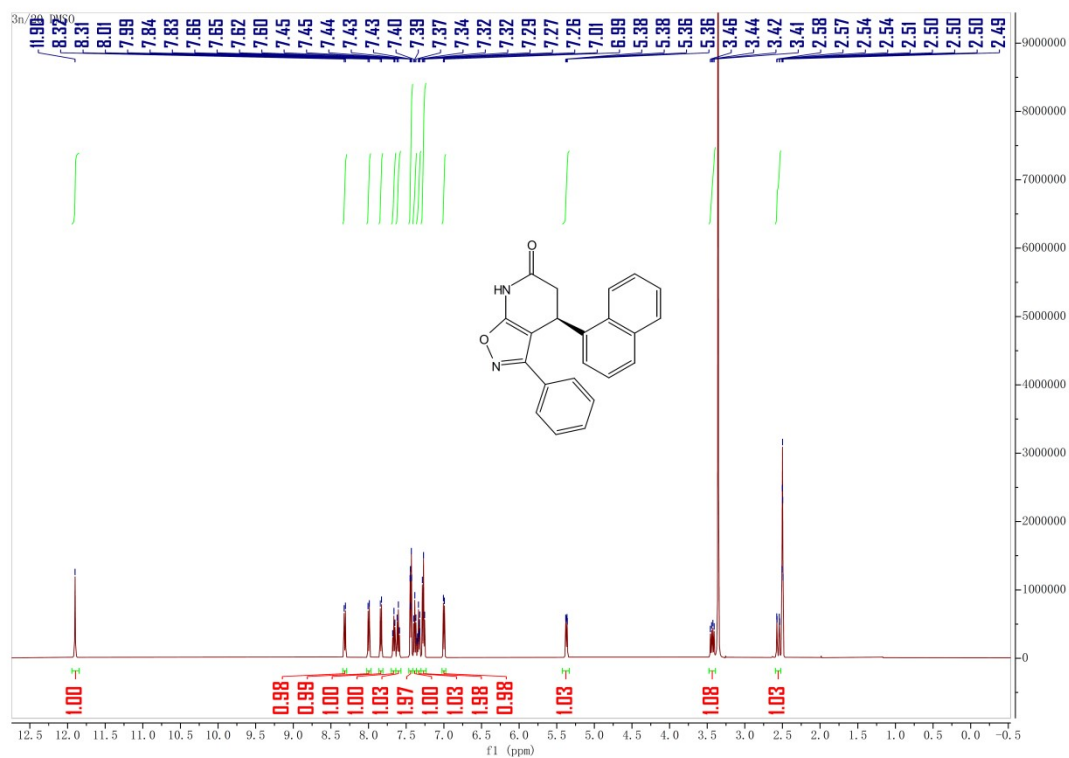

$^1\text{H}$  NMR spectrum of **3n**

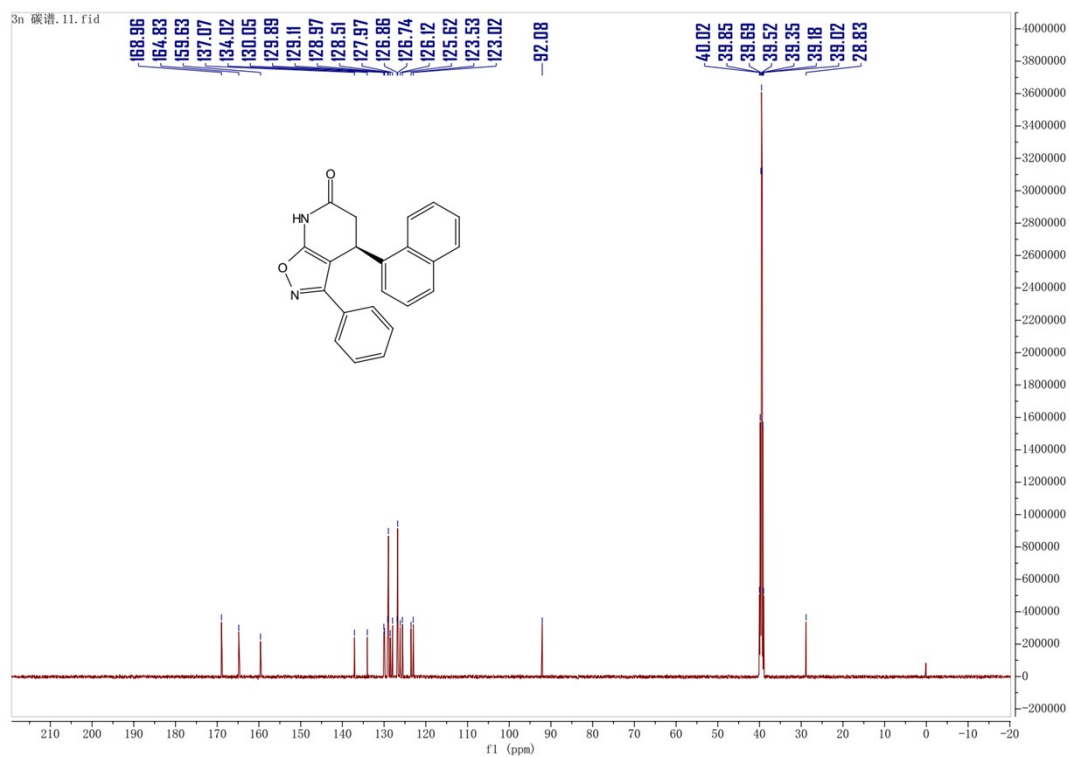

$^{13}\text{C}$  NMR spectrum of **3n**

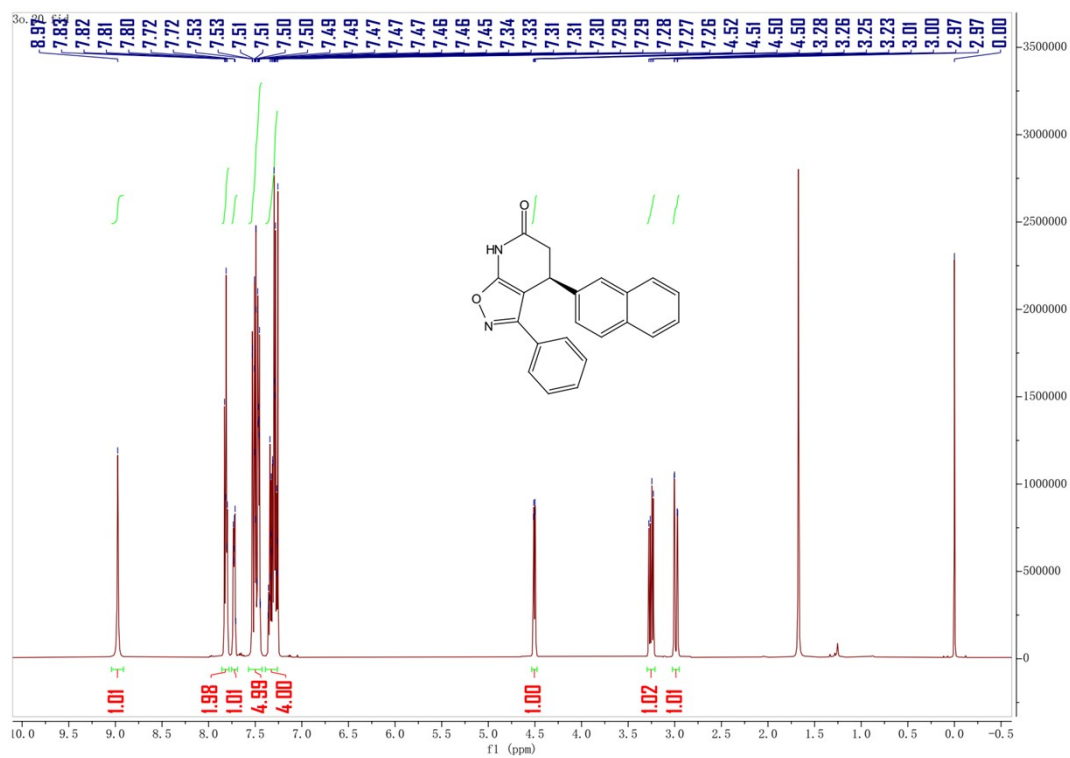

$^1\text{H}$  NMR spectrum of **3o**

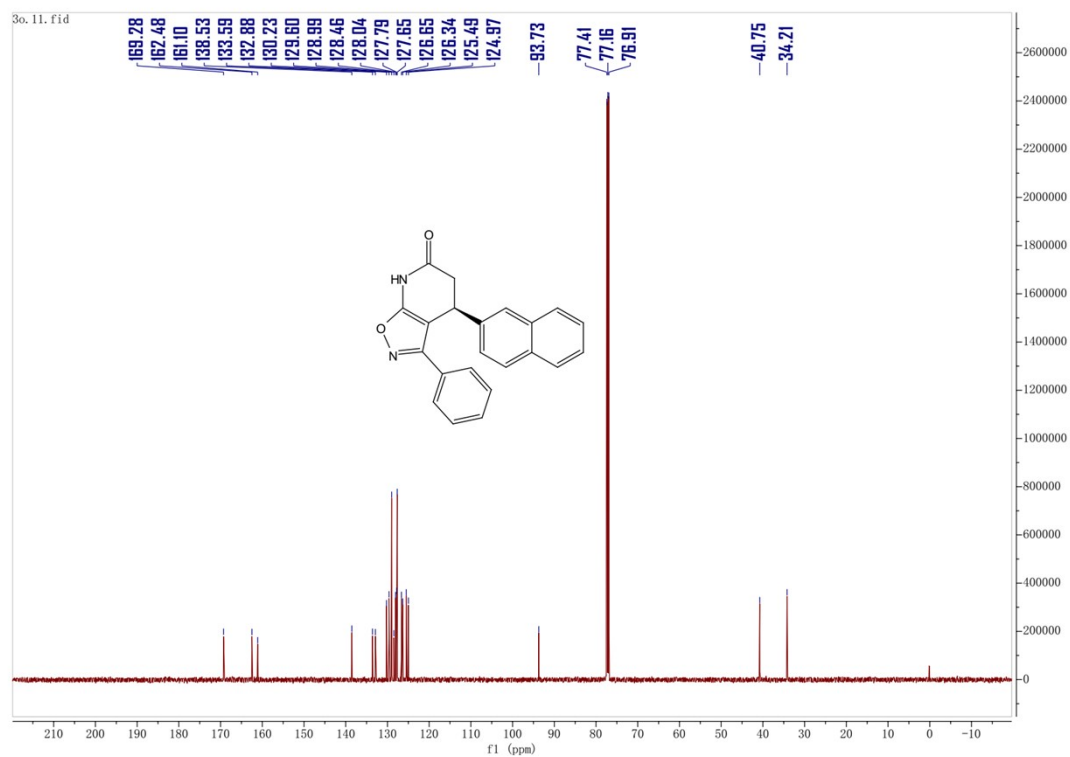

$^{13}\text{C}$  NMR spectrum of **3o**

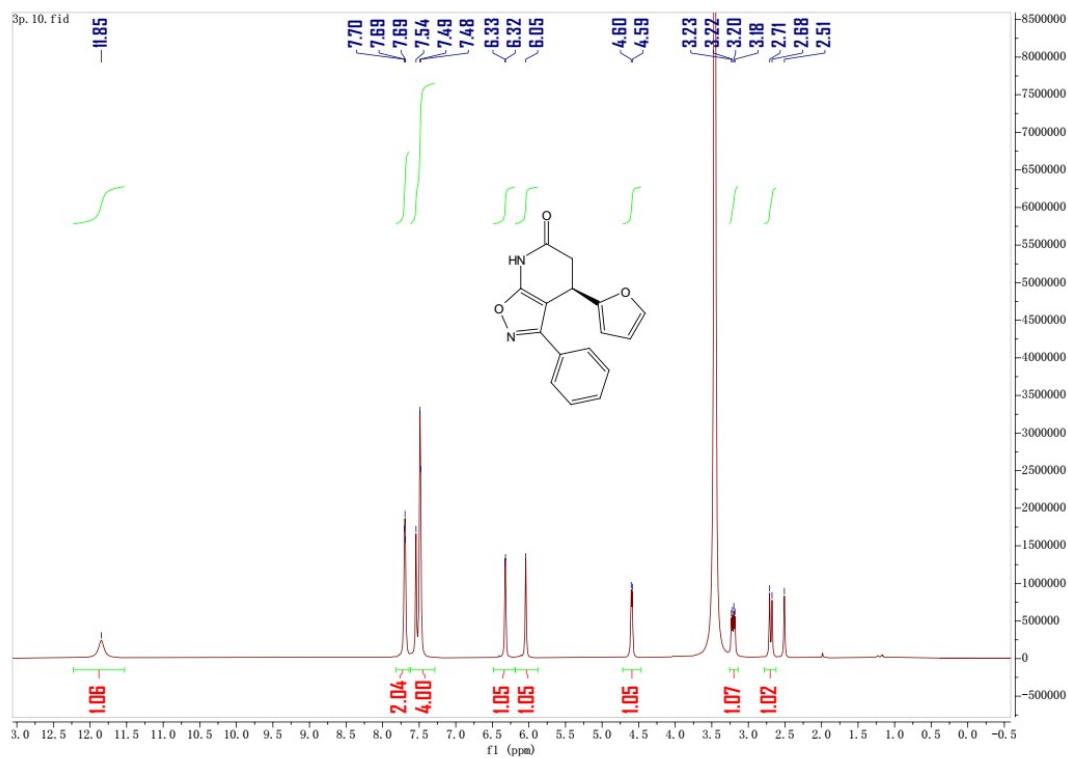

$^1\text{H}$  NMR spectrum of **3p**

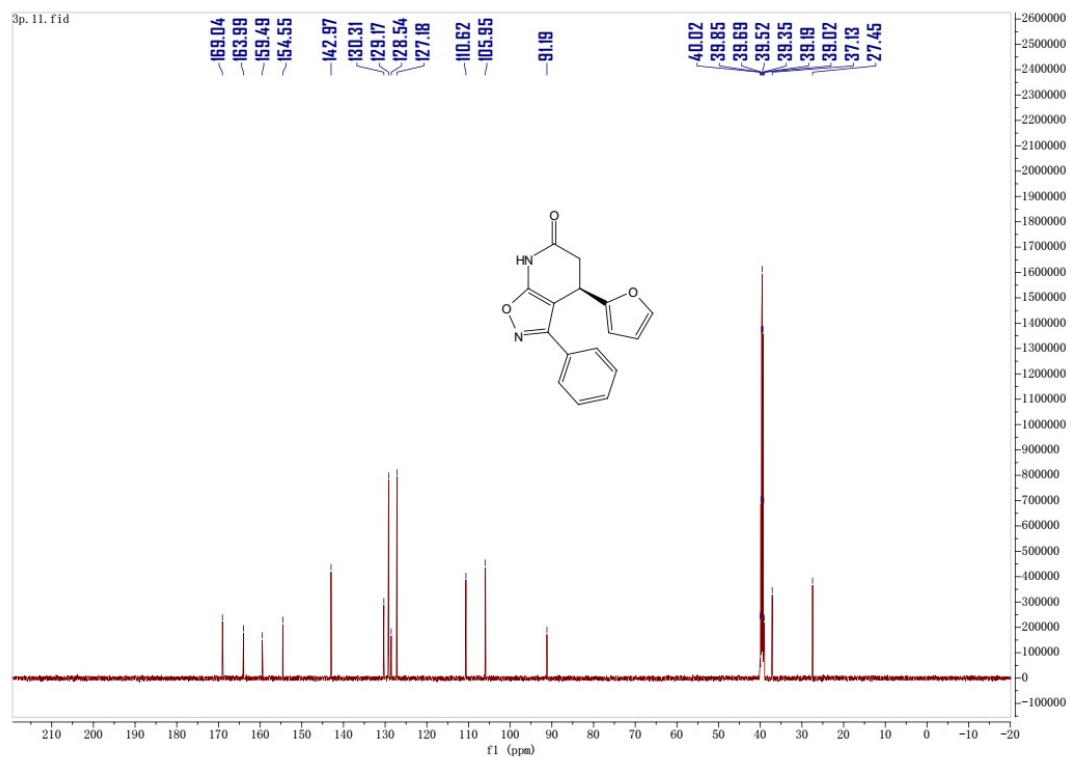

$^{13}\text{C}$  NMR spectrum of **3p**

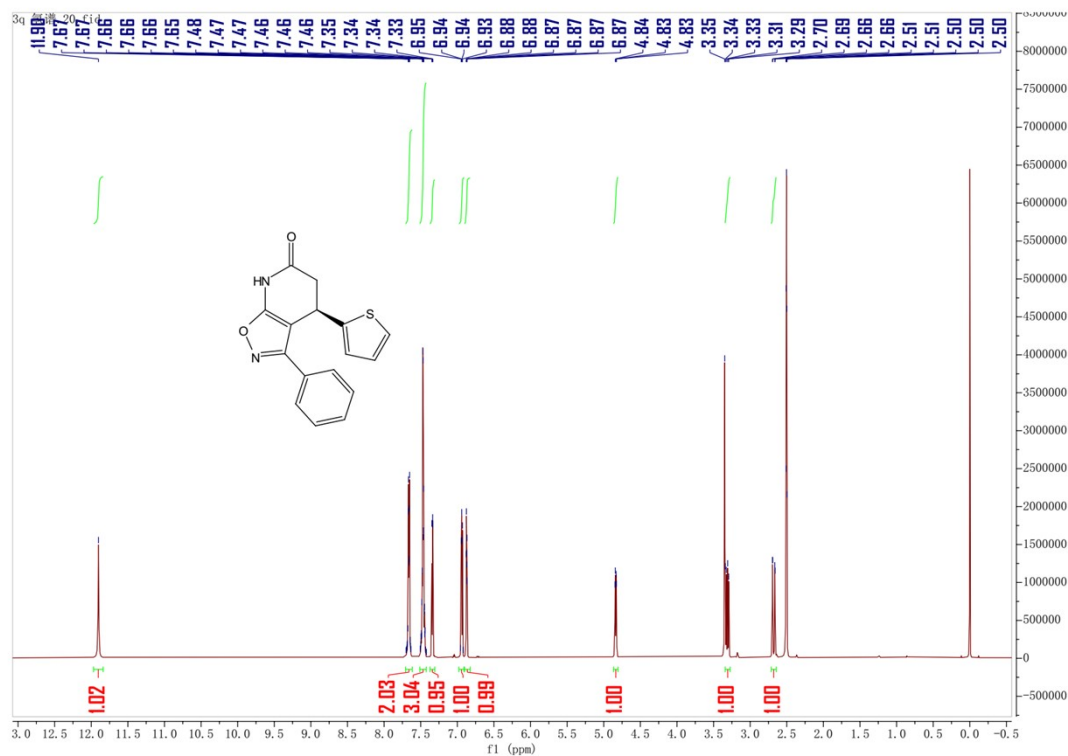

$^1\text{H}$  NMR spectrum of **3q**

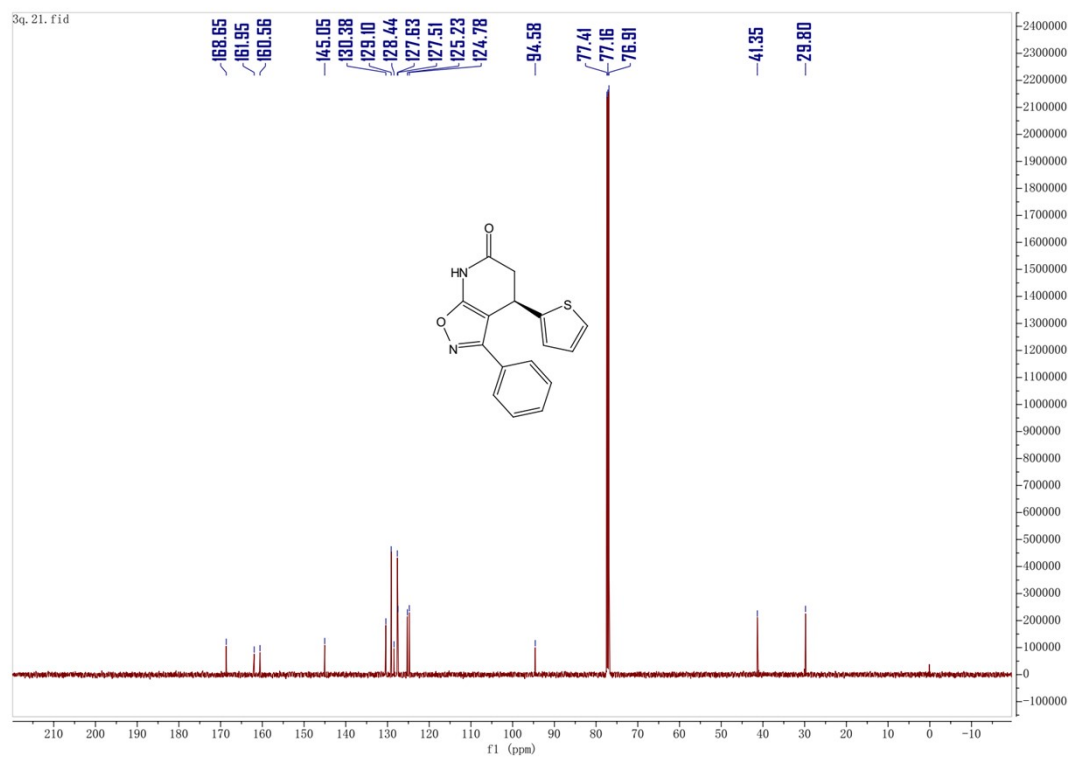

$^{13}\text{C}$  NMR spectrum of **3q**

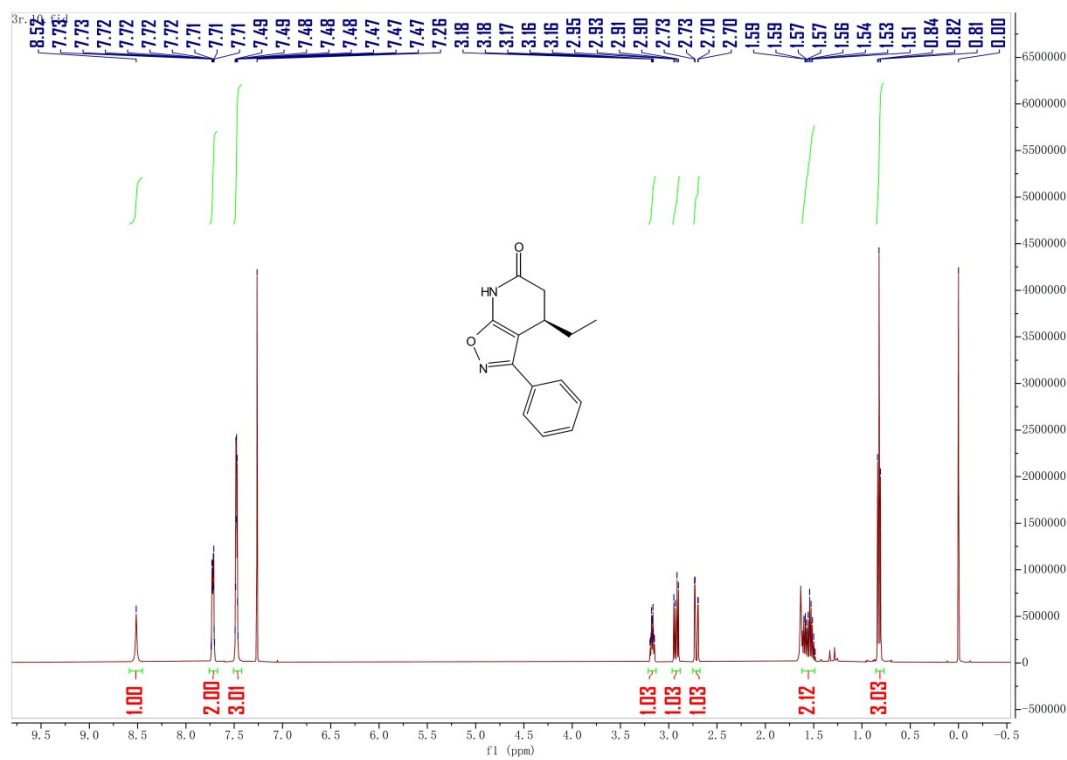

**<sup>1</sup>H NMR spectrum of 3r**

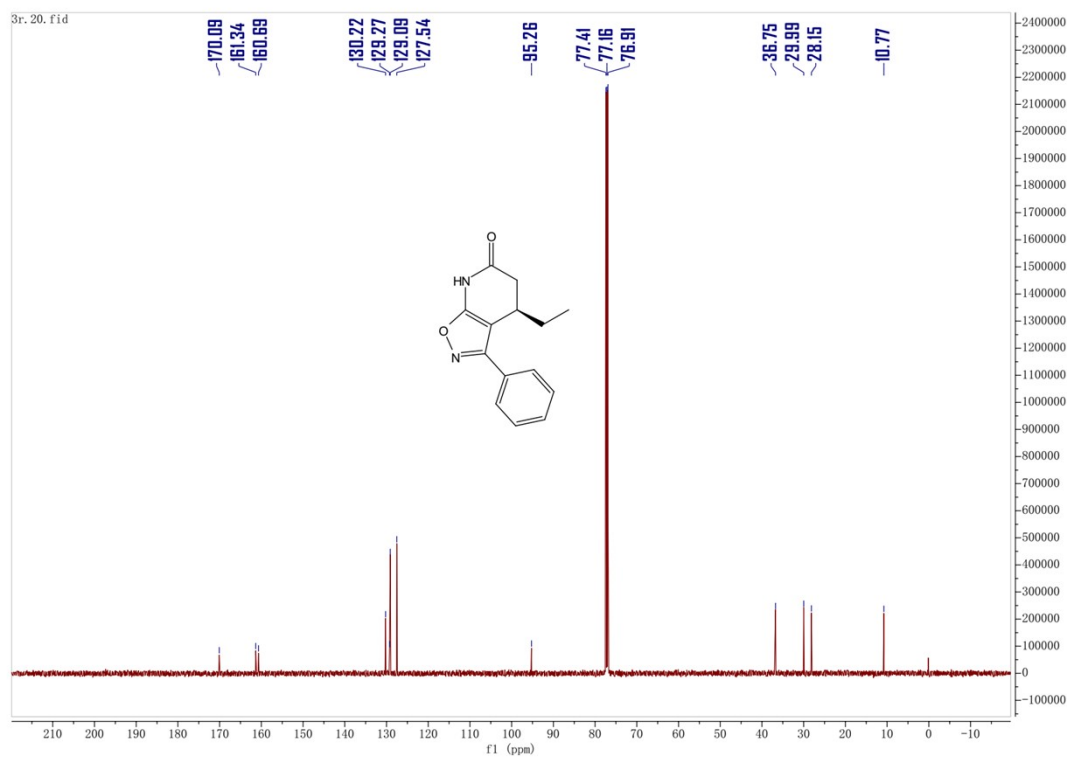

**<sup>13</sup>C NMR spectrum of 3r**

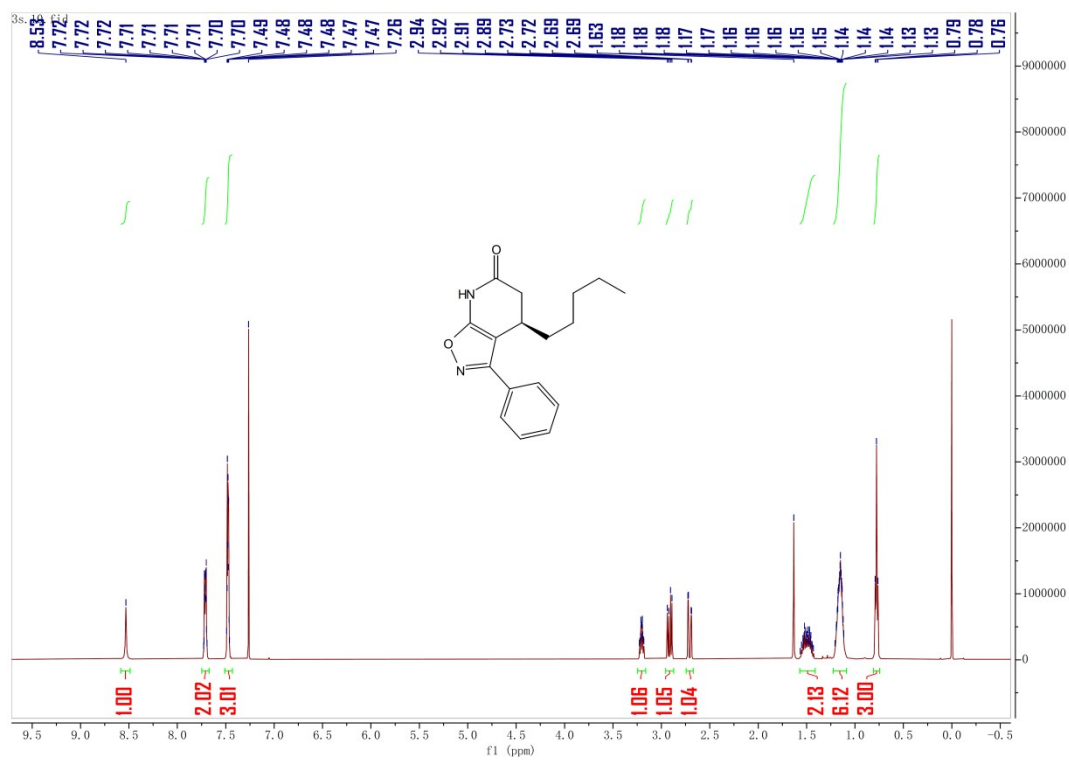

<sup>1</sup>H NMR spectrum of 3s

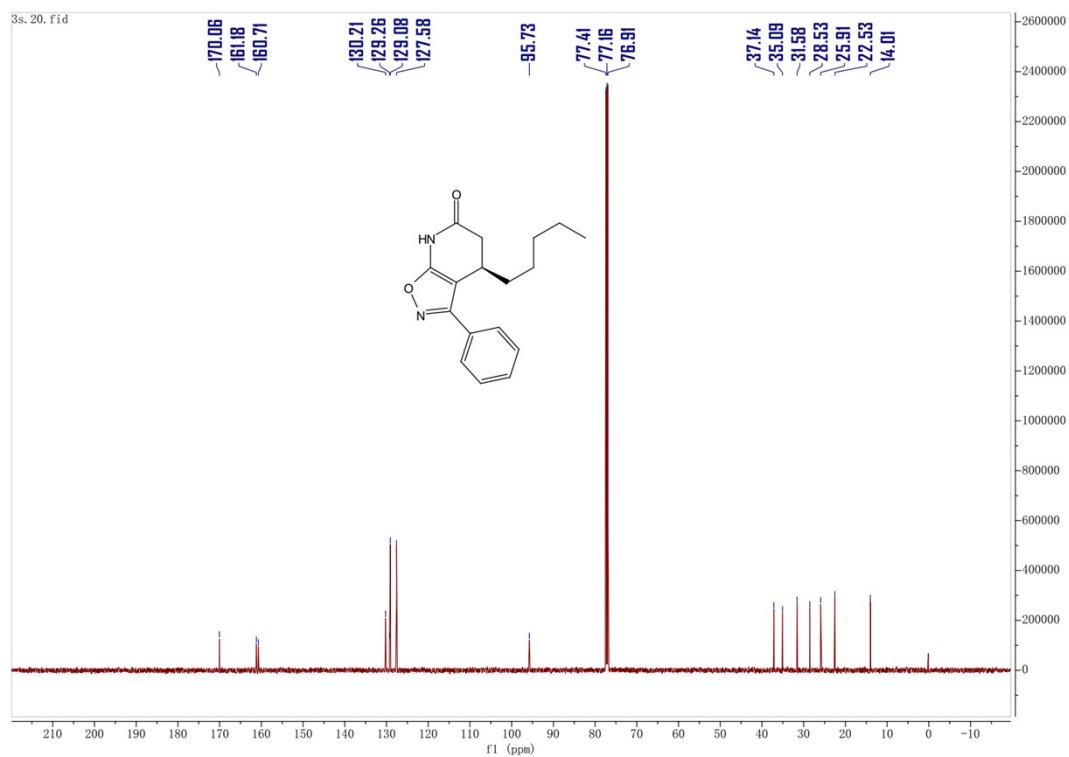

<sup>13</sup>C NMR spectrum of 3s

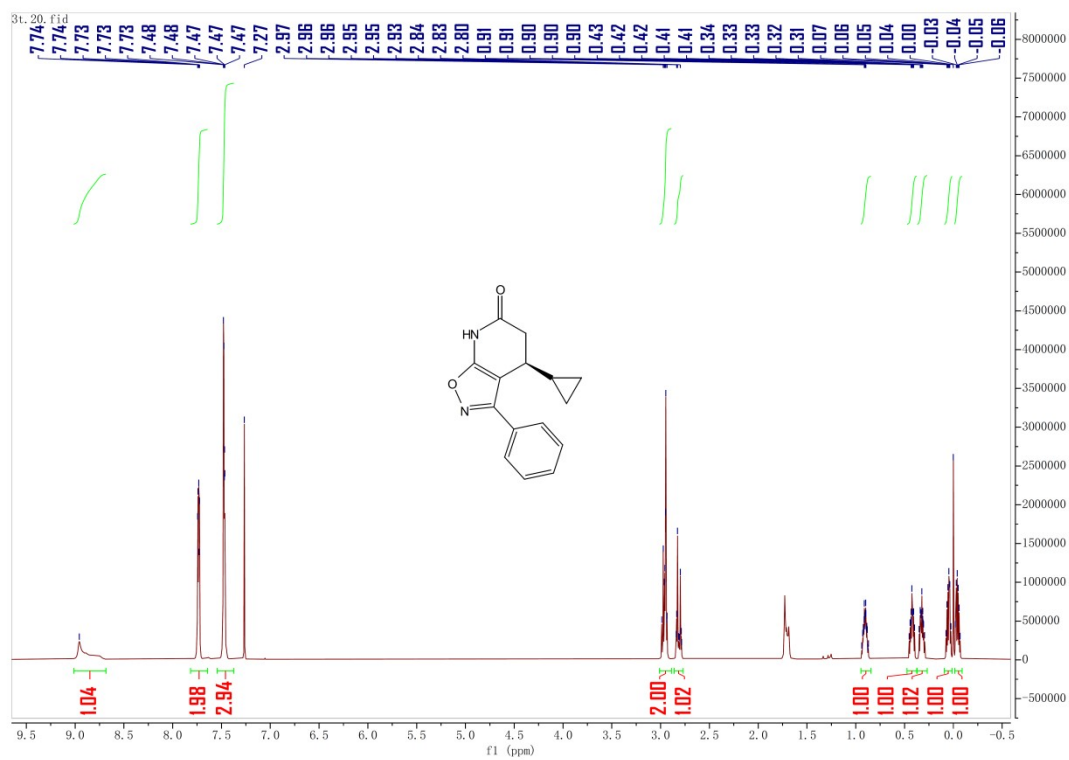

$^1\text{H}$  NMR spectrum of 3t

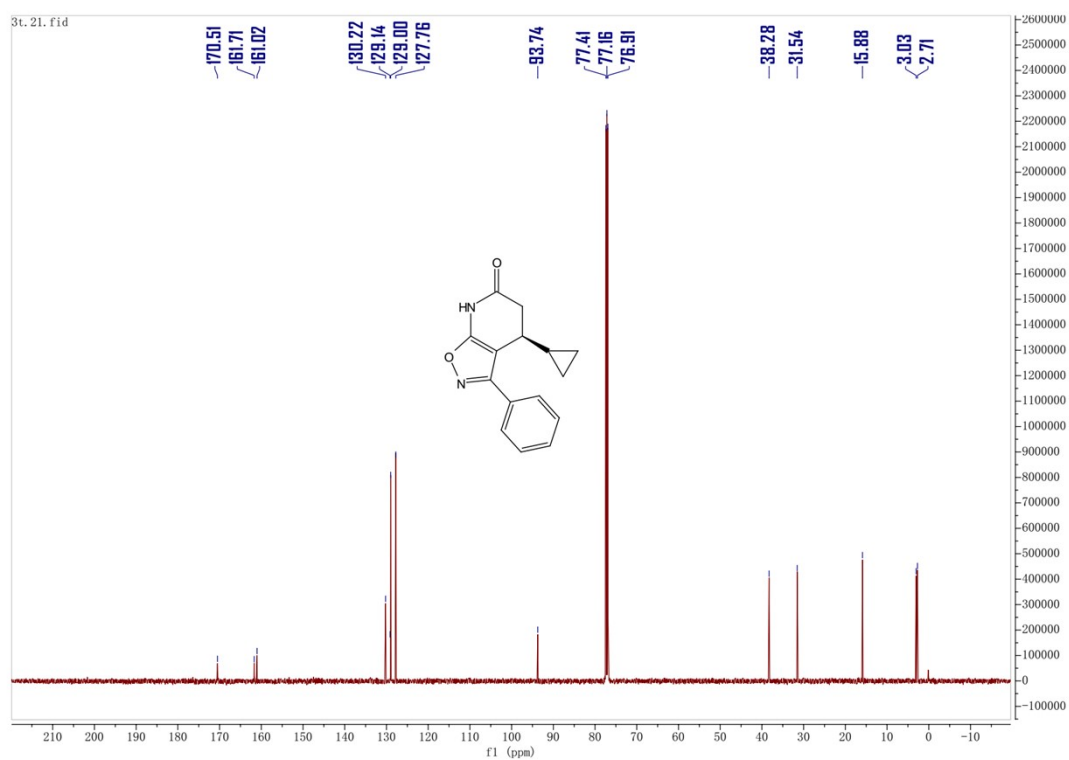

$^{13}\text{C}$  NMR spectrum of 3t



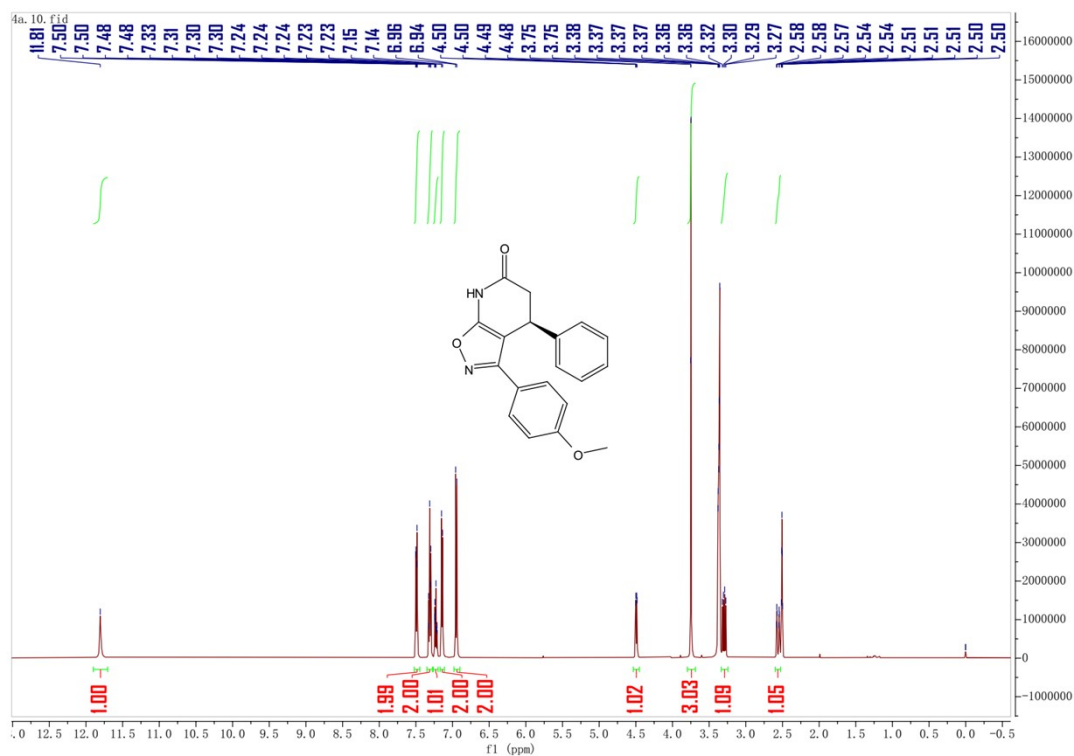

$^1\text{H}$  NMR spectrum of 4a

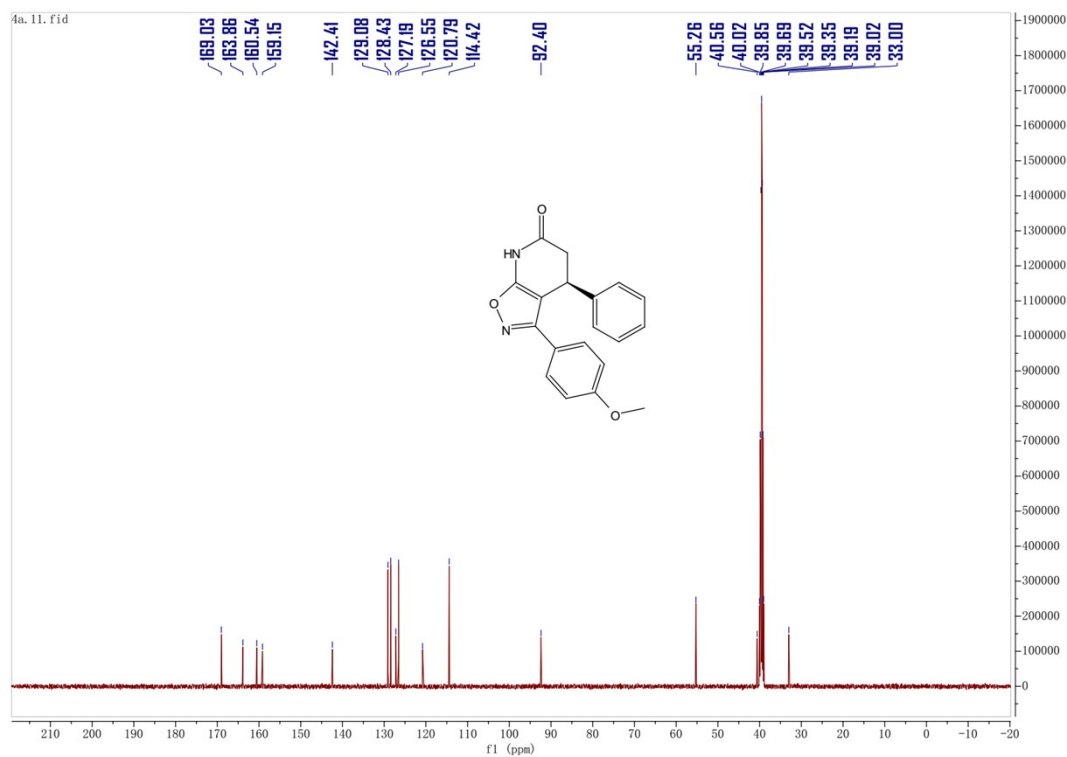

$^{13}\text{C}$  NMR spectrum of 4a

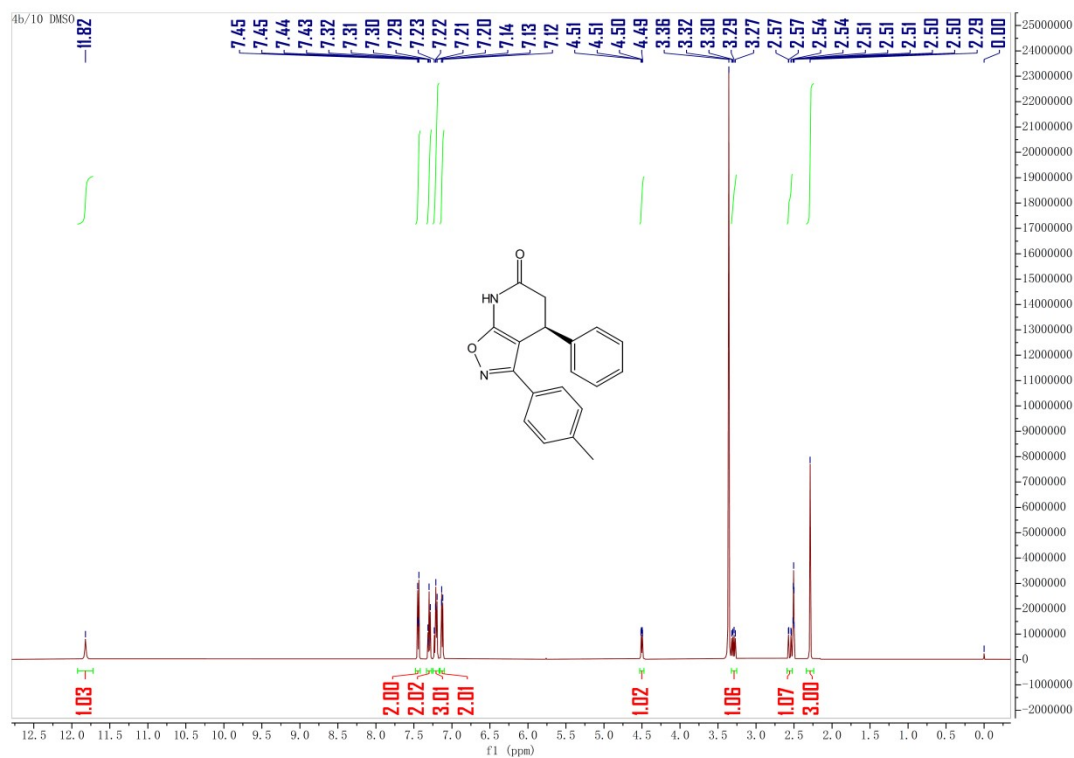

$^1\text{H}$  NMR spectrum of **4b**

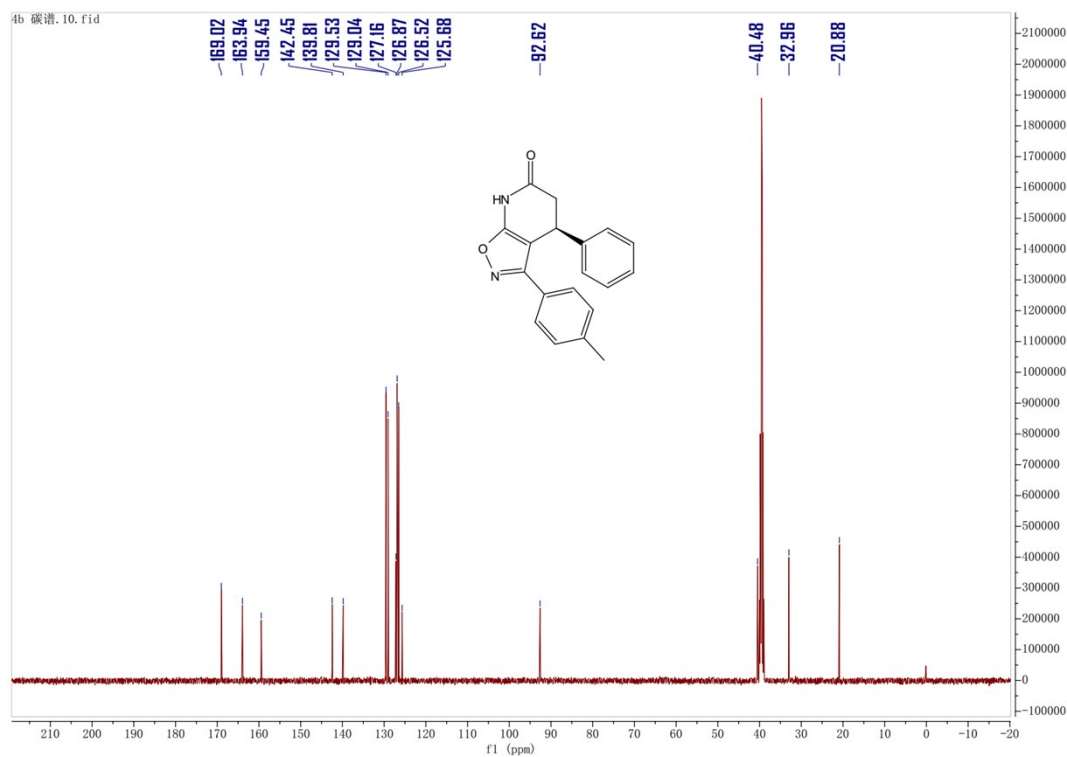

$^{13}\text{C}$  NMR spectrum of **4b**

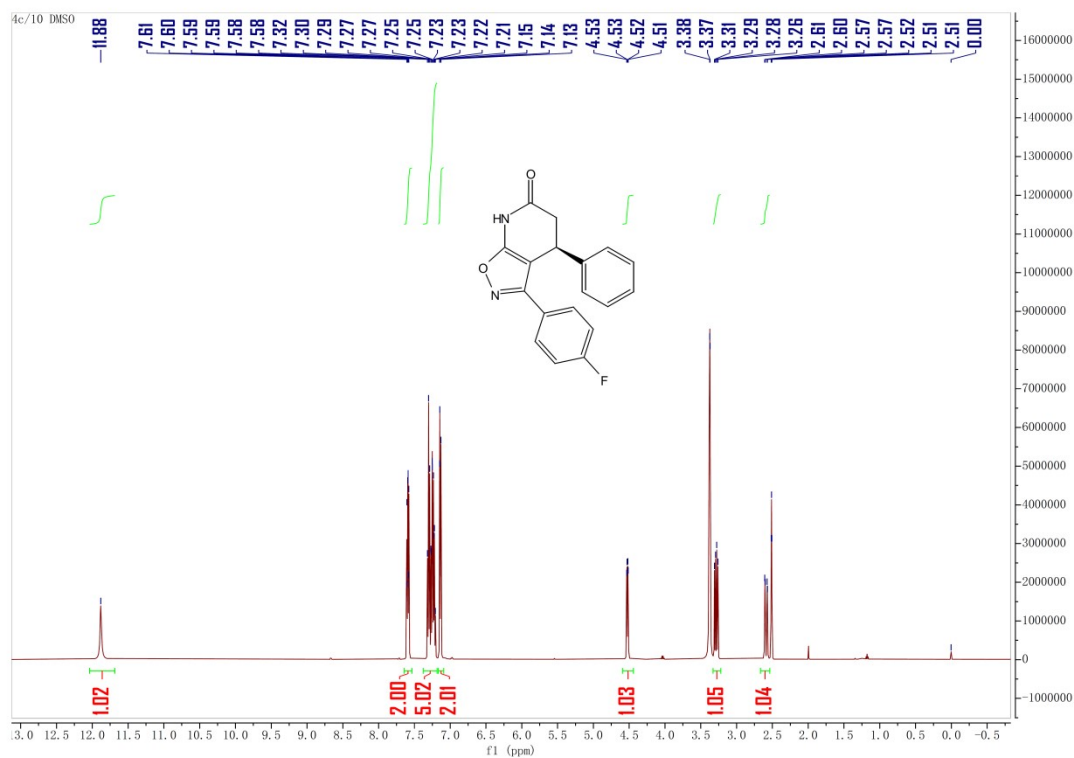

$^1\text{H}$  NMR spectrum of 4c

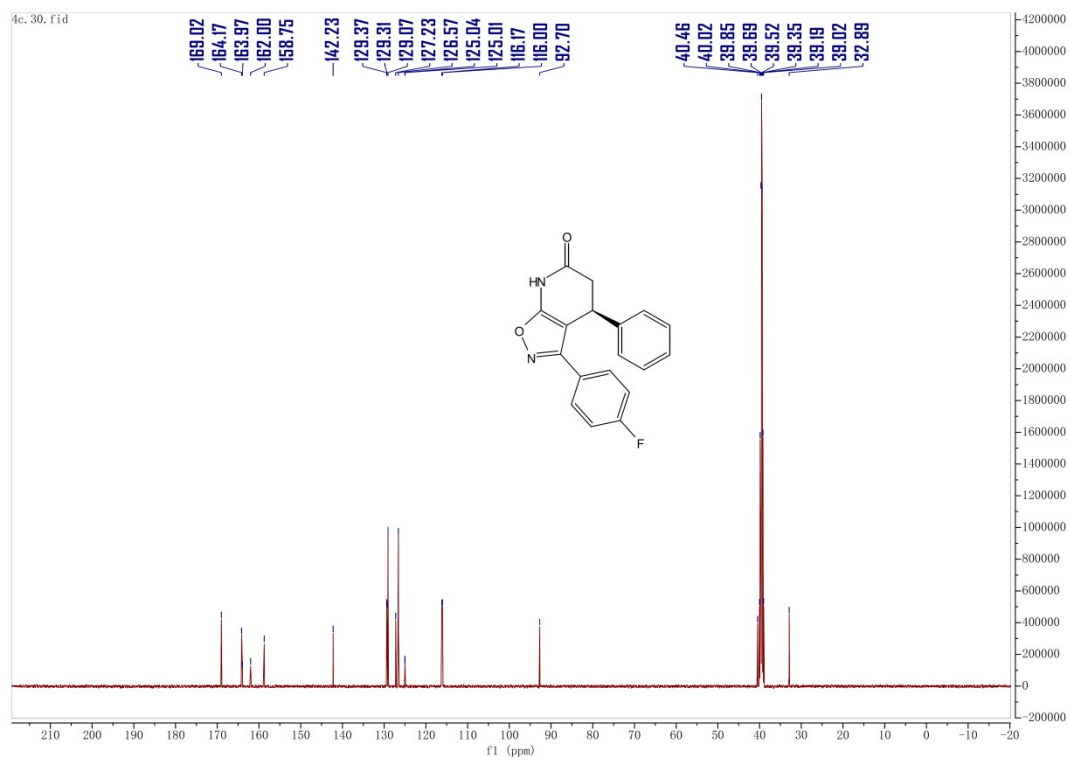

$^{13}\text{C}$  NMR spectrum of 4c

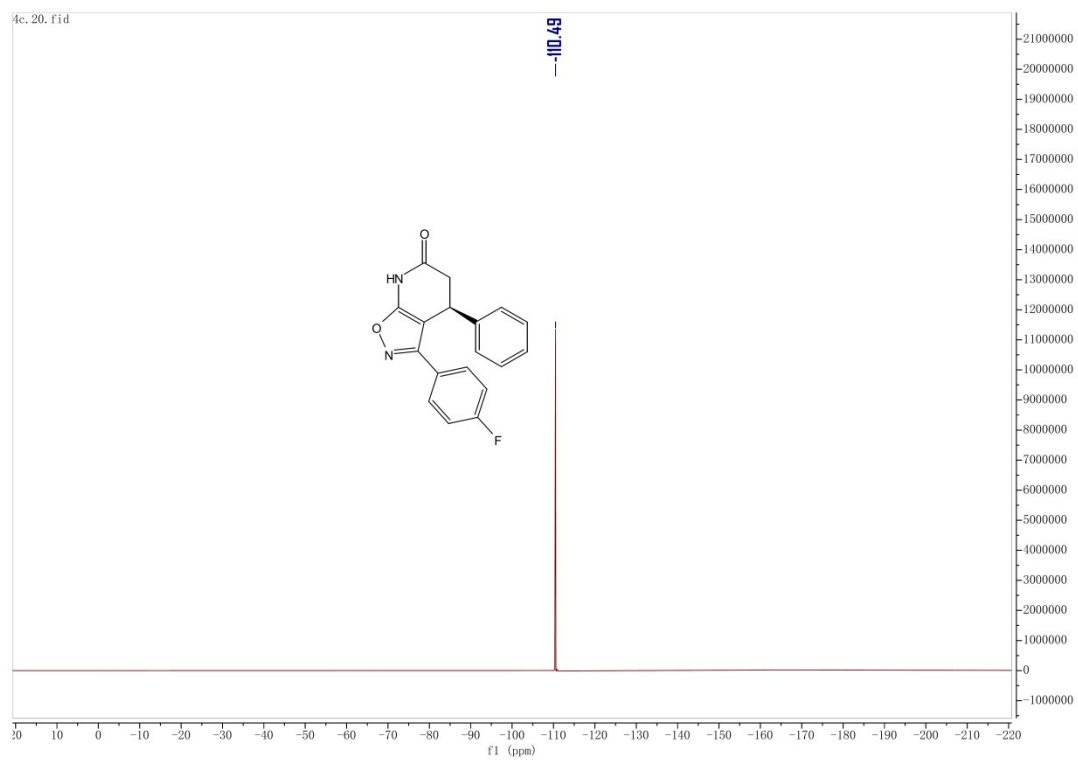

$^{19}\text{F}$  NMR spectrum of **4c**

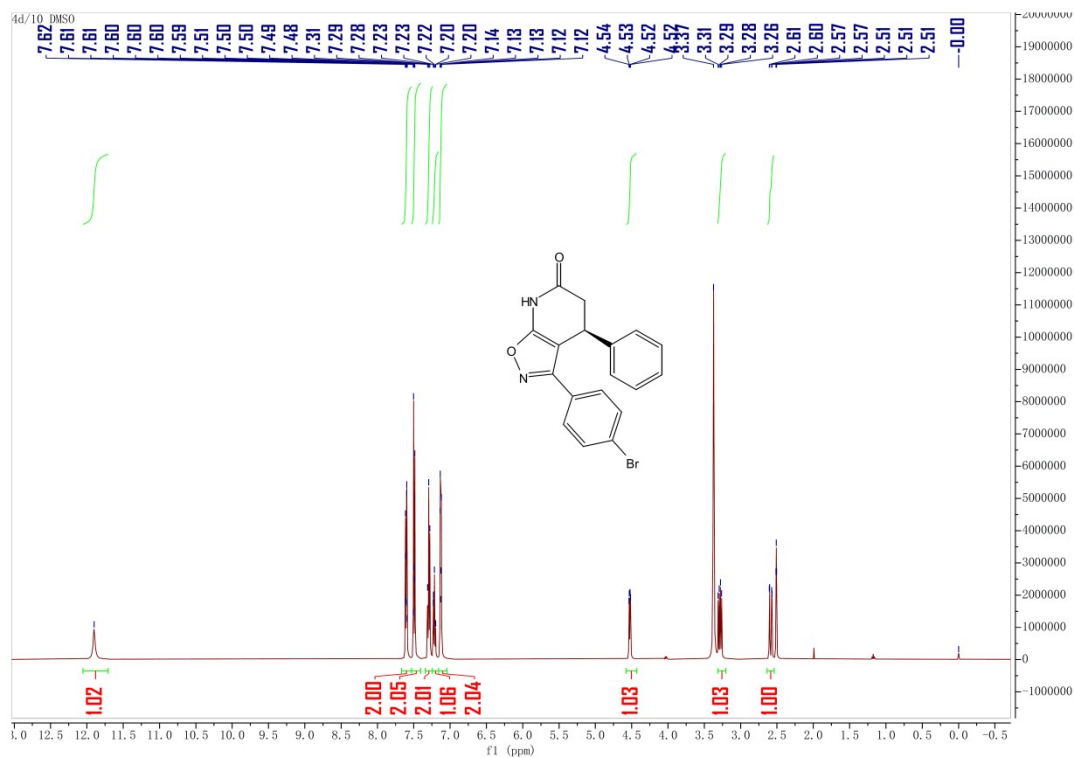

$^1\text{H}$  NMR spectrum of 4d

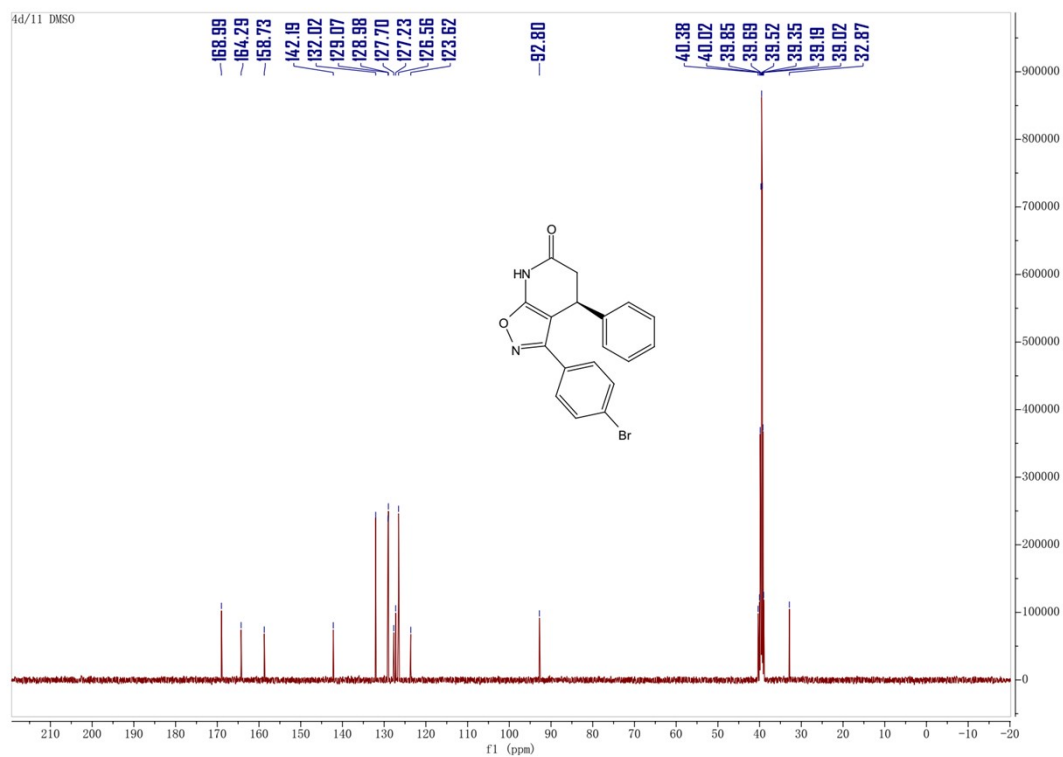

$^{13}\text{C}$  NMR spectrum of 4d

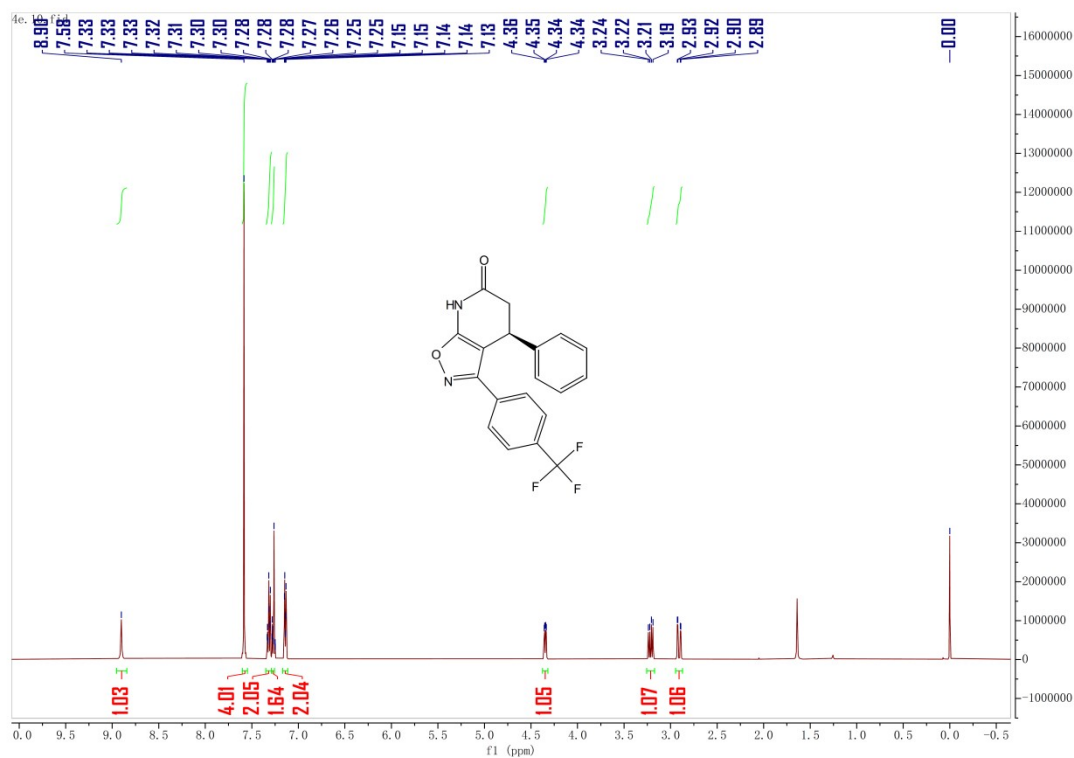

<sup>1</sup>H NMR spectrum of 4e

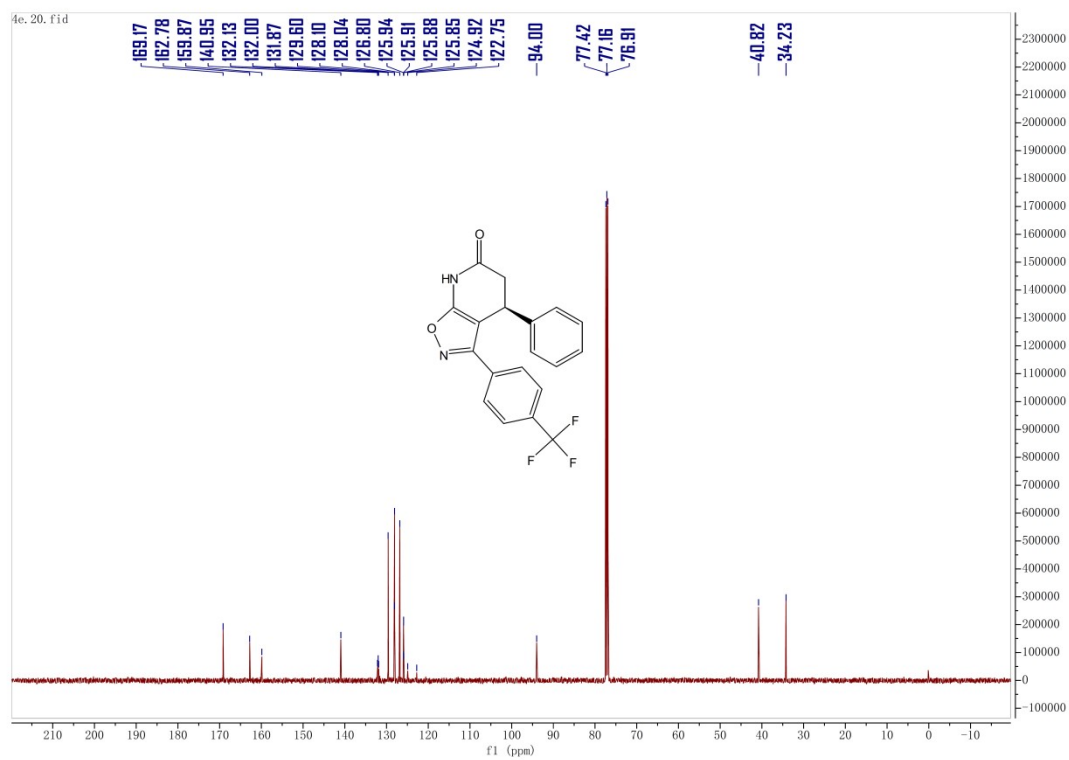

<sup>13</sup>C NMR spectrum of 4e

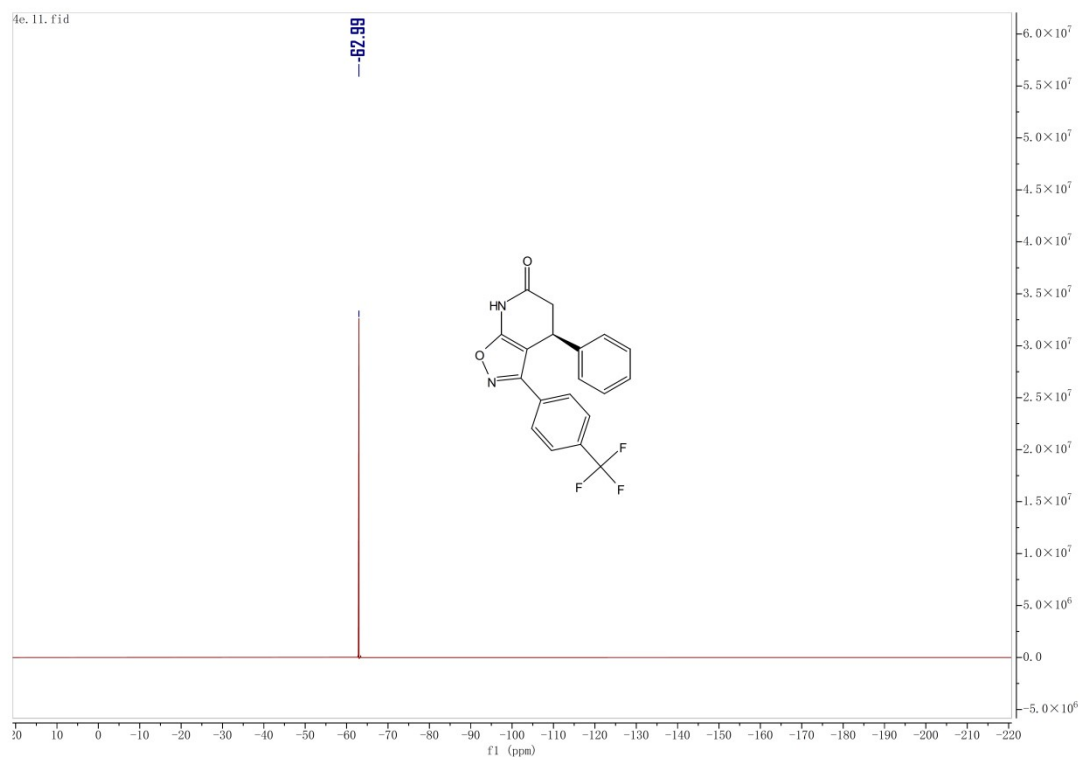

<sup>19</sup>F NMR spectrum of **4e**

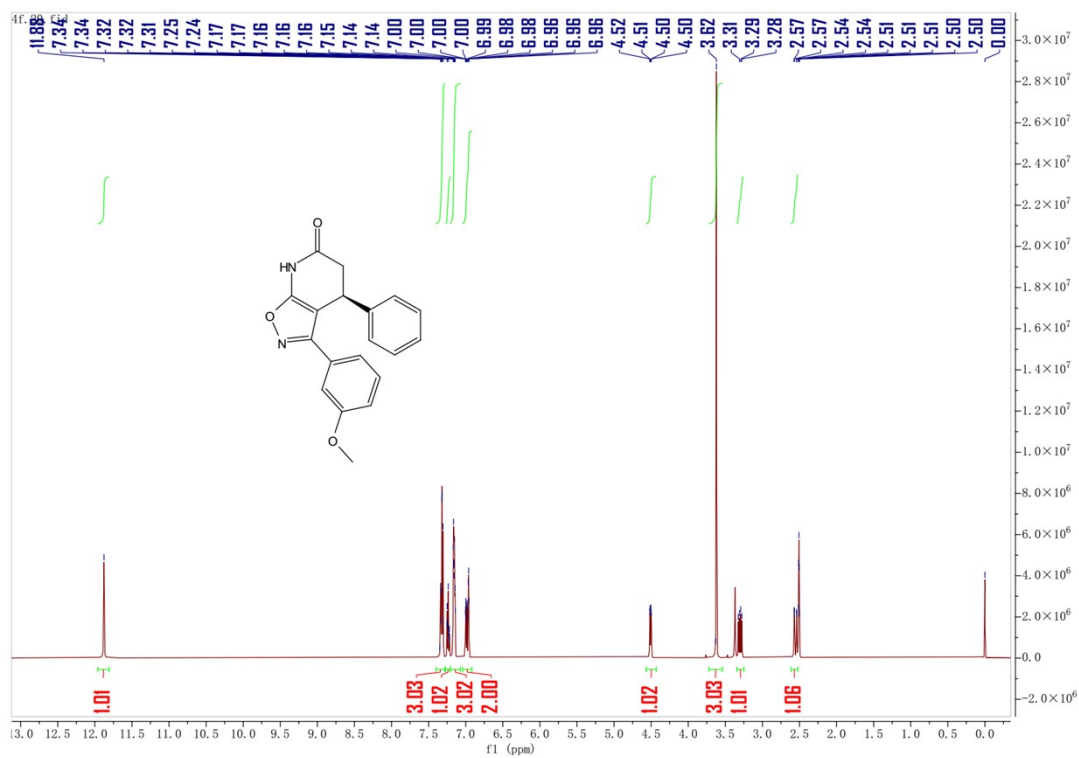

<sup>1</sup>H NMR spectrum of **4f**

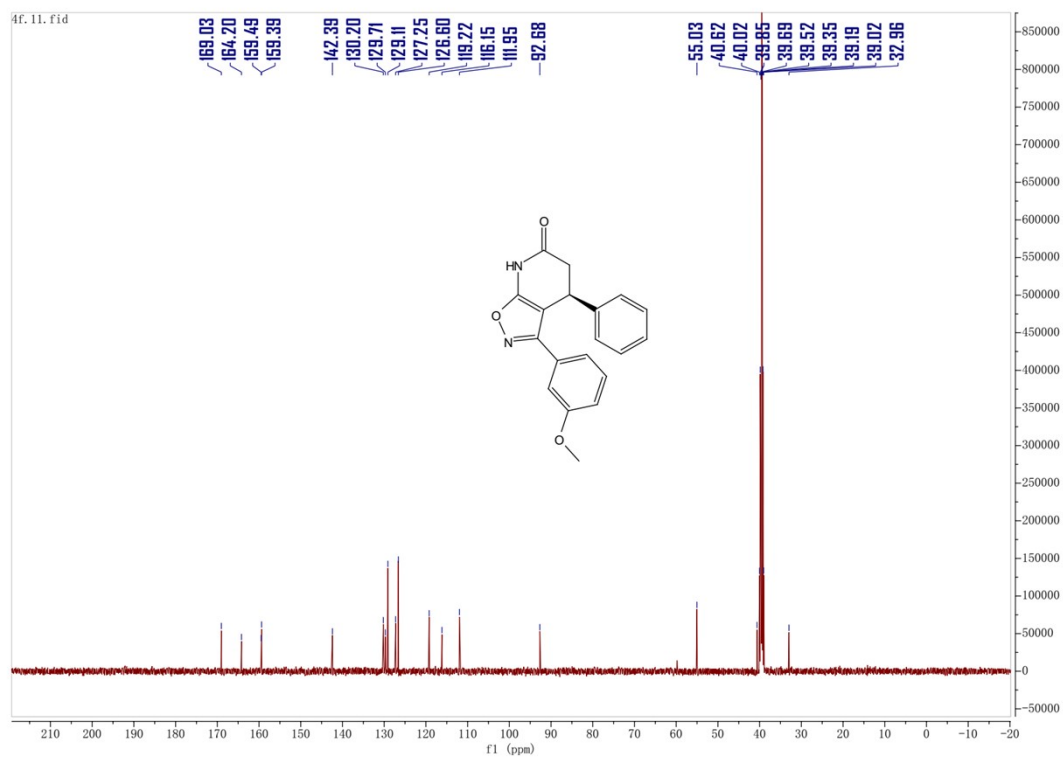

<sup>13</sup>C NMR spectrum of **4f**



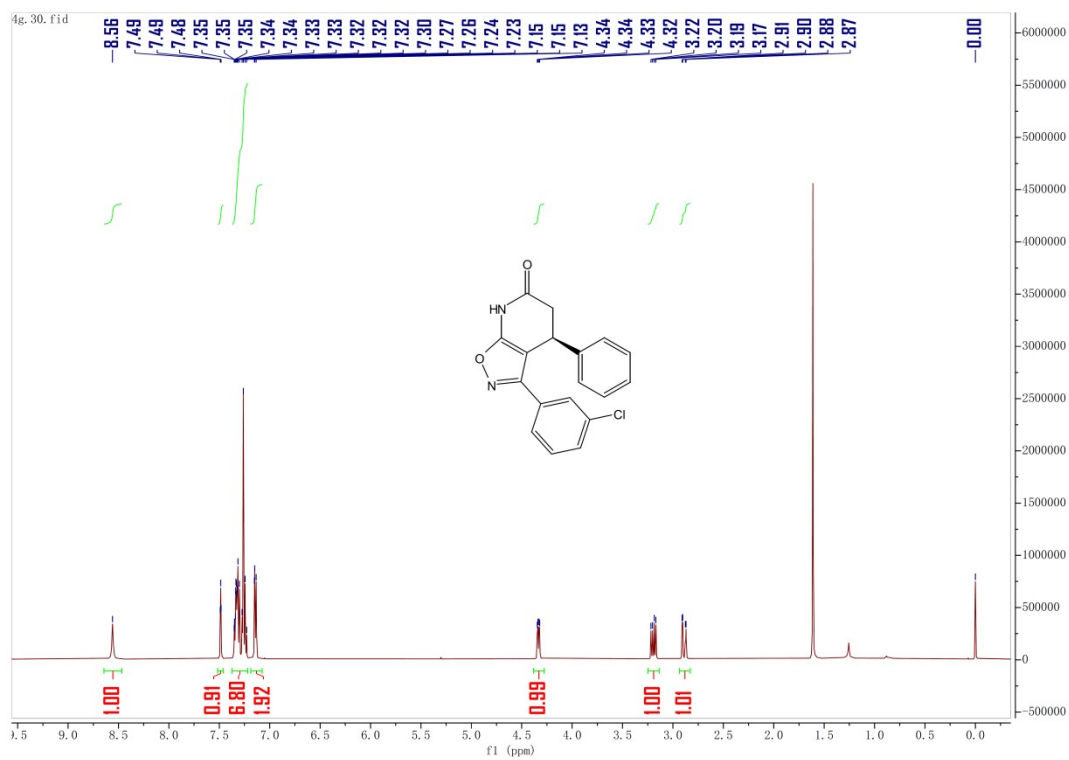

<sup>1</sup>H NMR spectrum of 4g

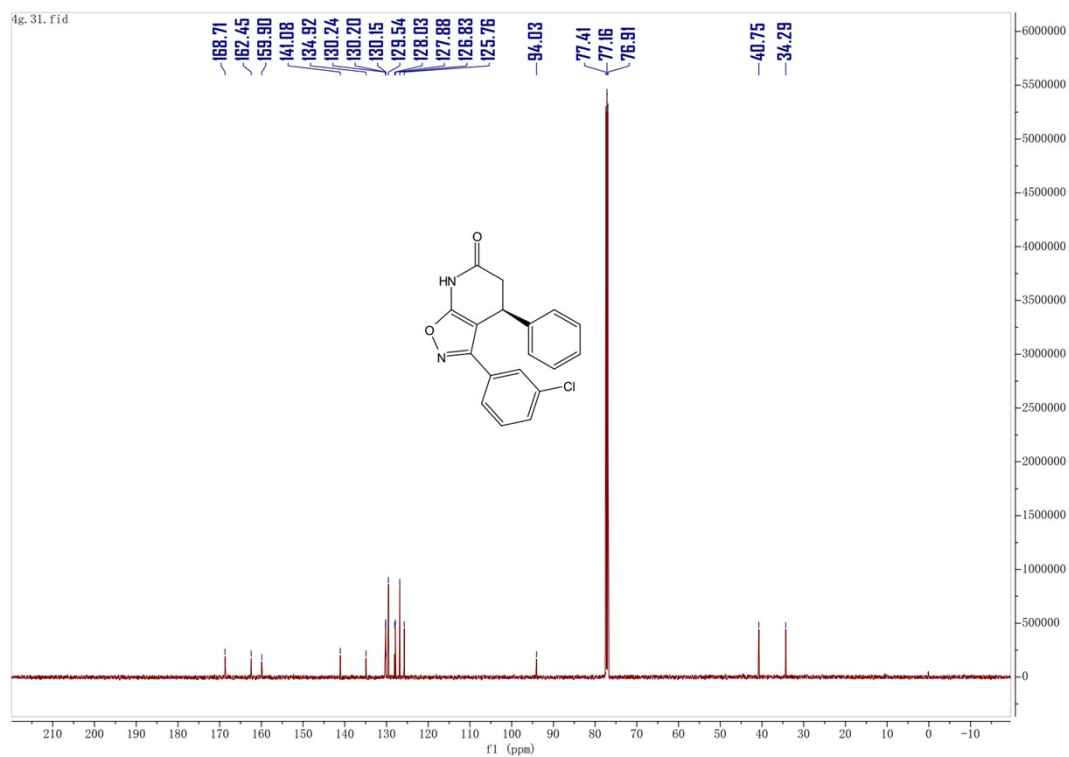

<sup>13</sup>C NMR spectrum of 4g

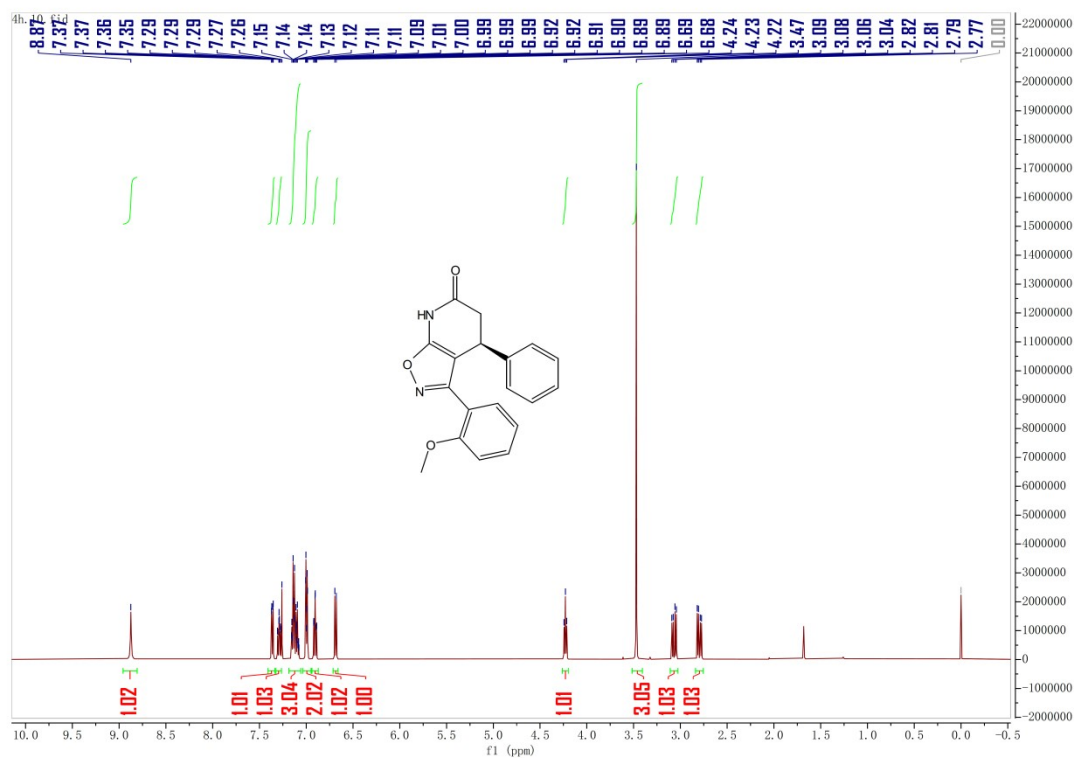

<sup>1</sup>H NMR spectrum of 4h

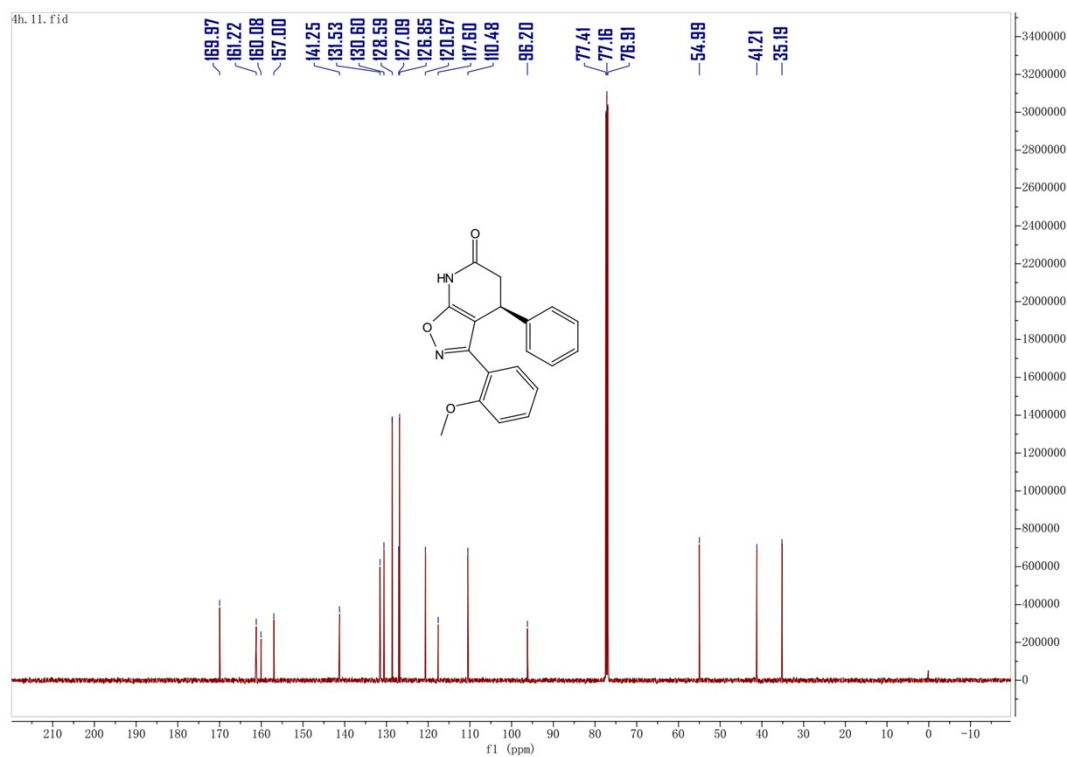

<sup>13</sup>C NMR spectrum of 4h

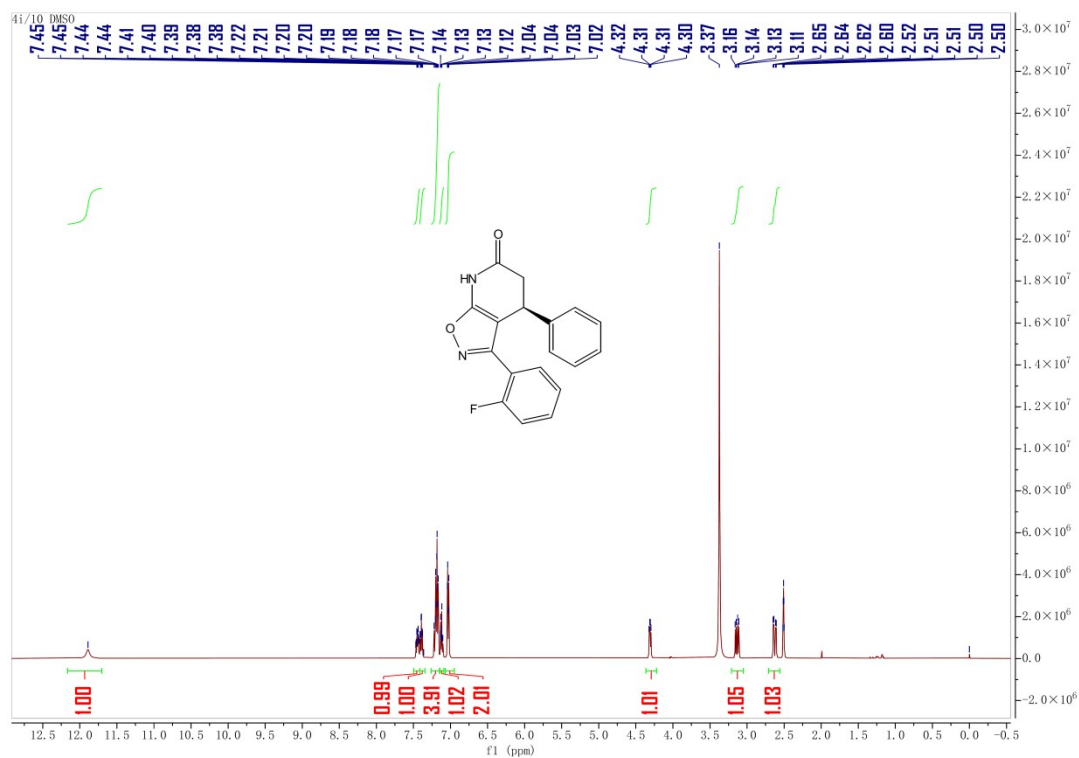

$^1\text{H}$  NMR spectrum of **4i**

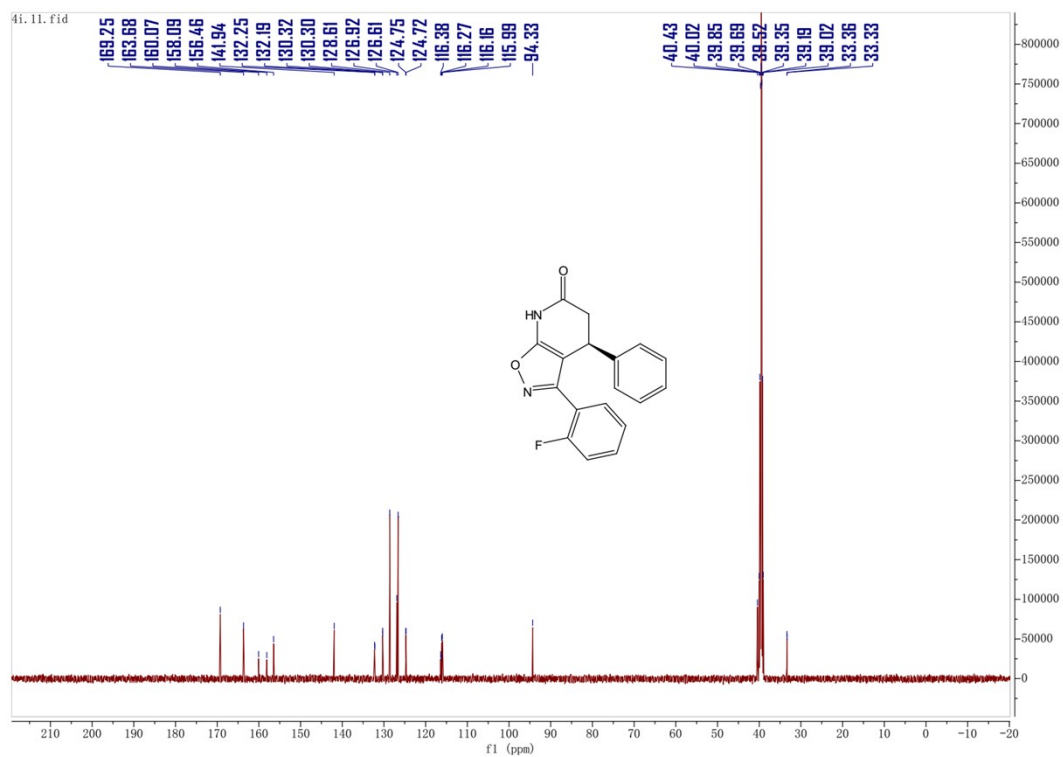

$^{13}\text{C}$  NMR spectrum of **4i**

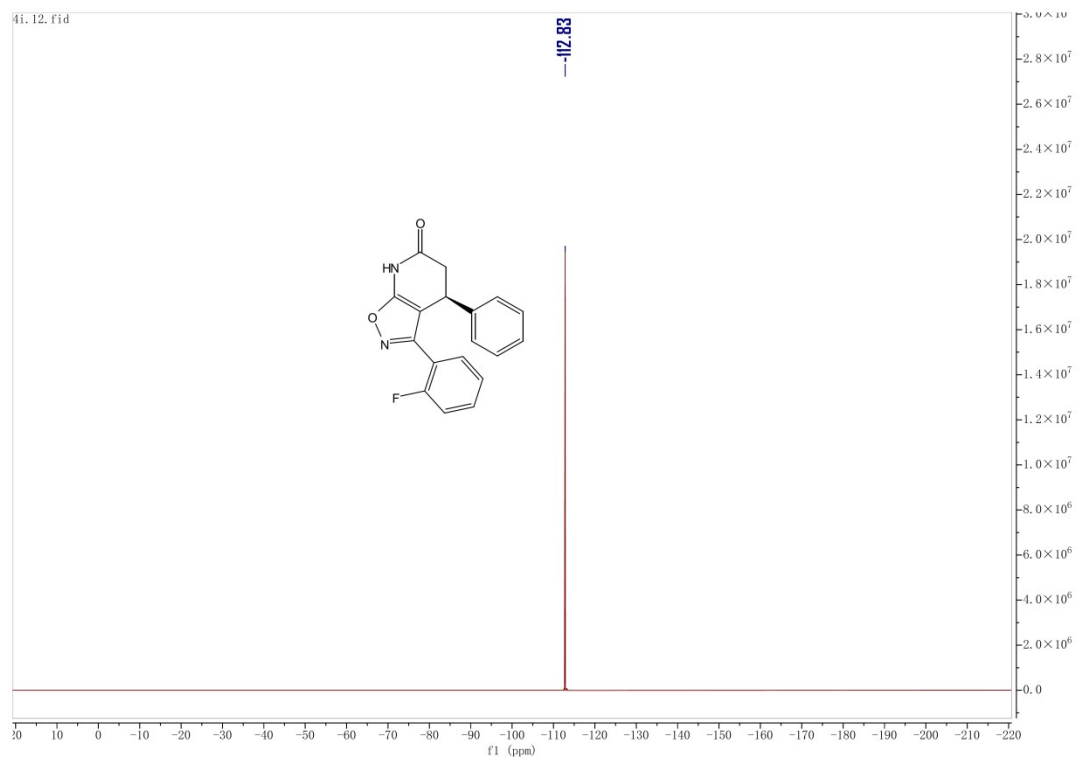

$^{19}\text{F}$  NMR spectrum of **4i**

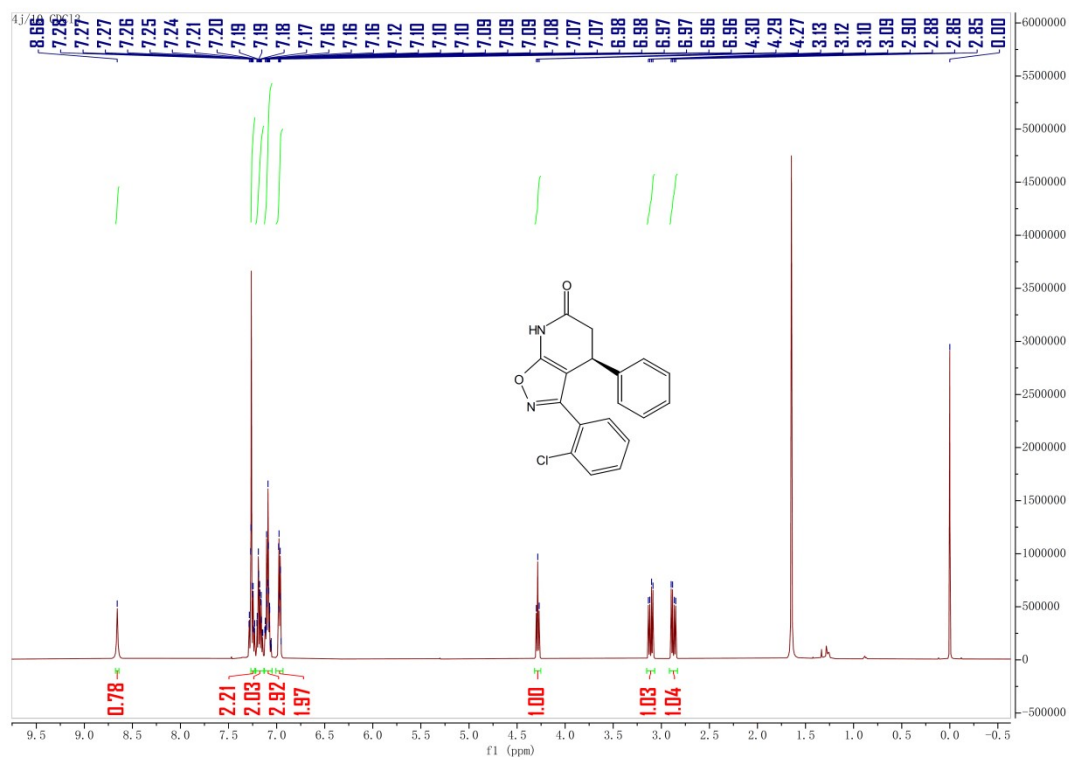

$^1\text{H}$  NMR spectrum of **4j**

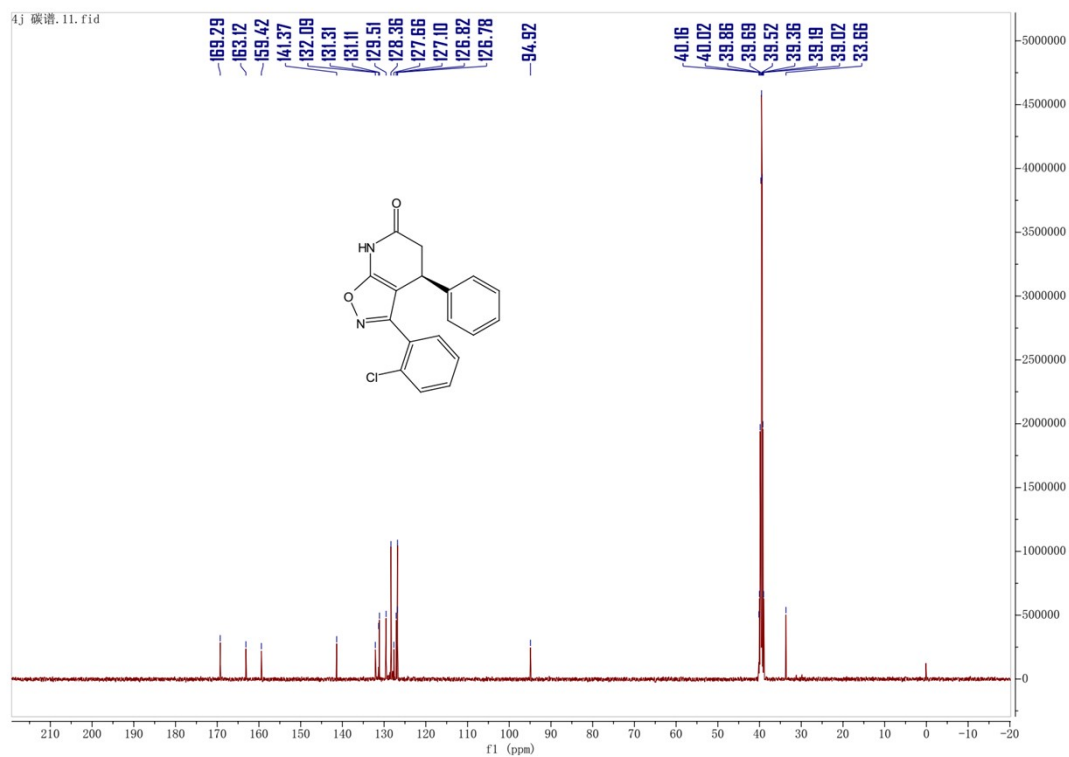

$^{13}\text{C}$  NMR spectrum of **4j**

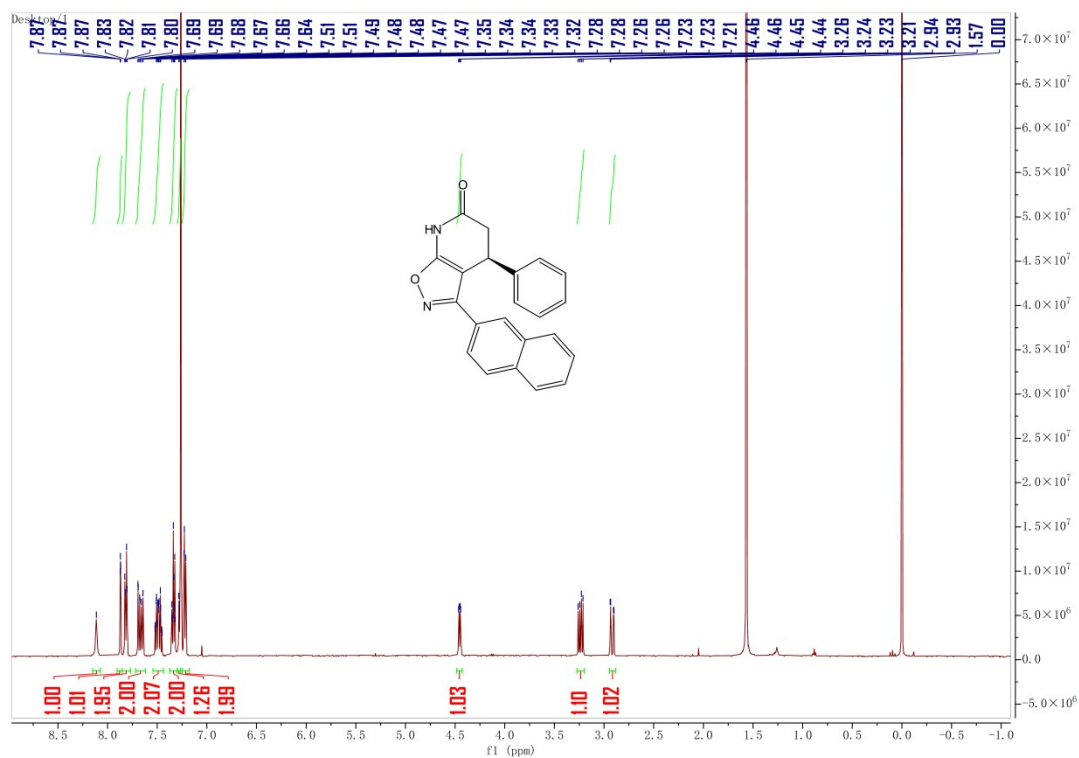

<sup>1</sup>H NMR spectrum of **4k**

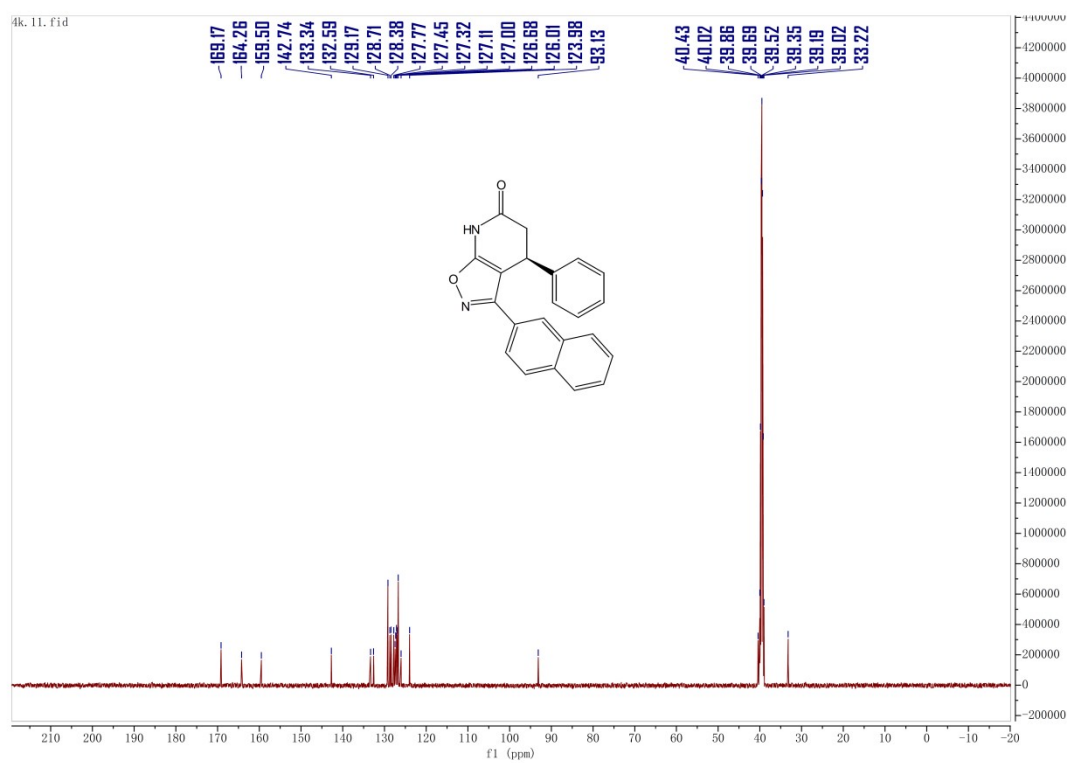

<sup>13</sup>C NMR spectrum of **4k**

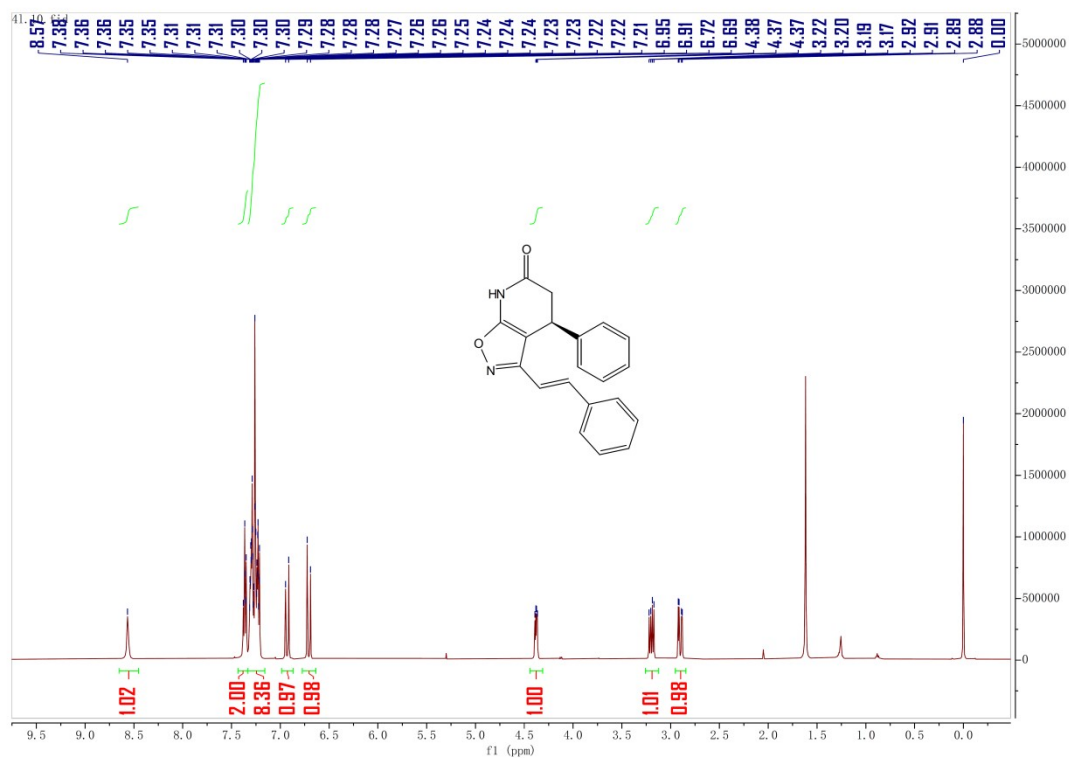

<sup>1</sup>H NMR spectrum of 41

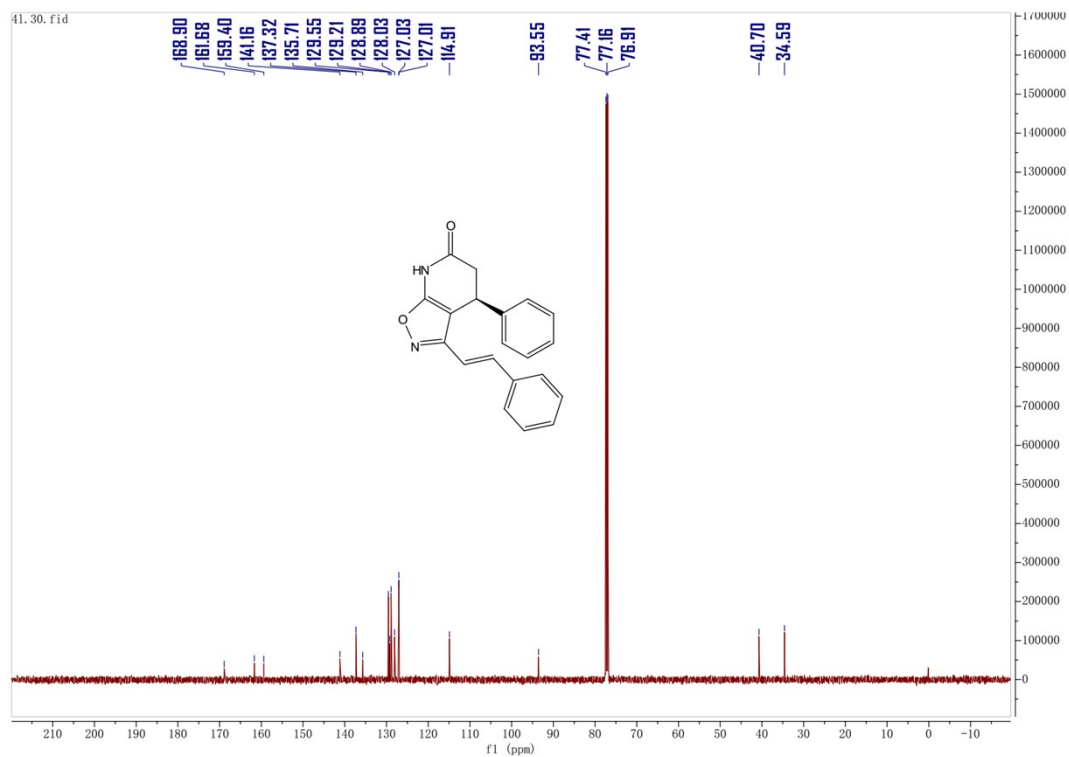

<sup>13</sup>C NMR spectrum of 41

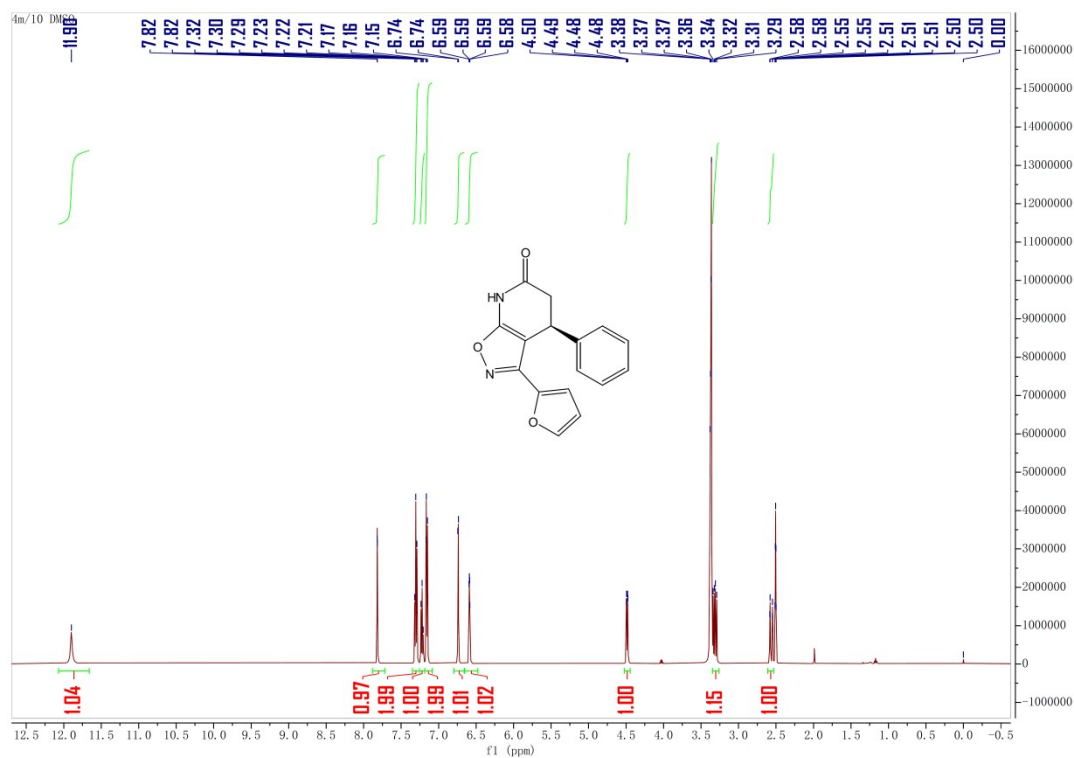

$^1\text{H}$  NMR spectrum of **4m**

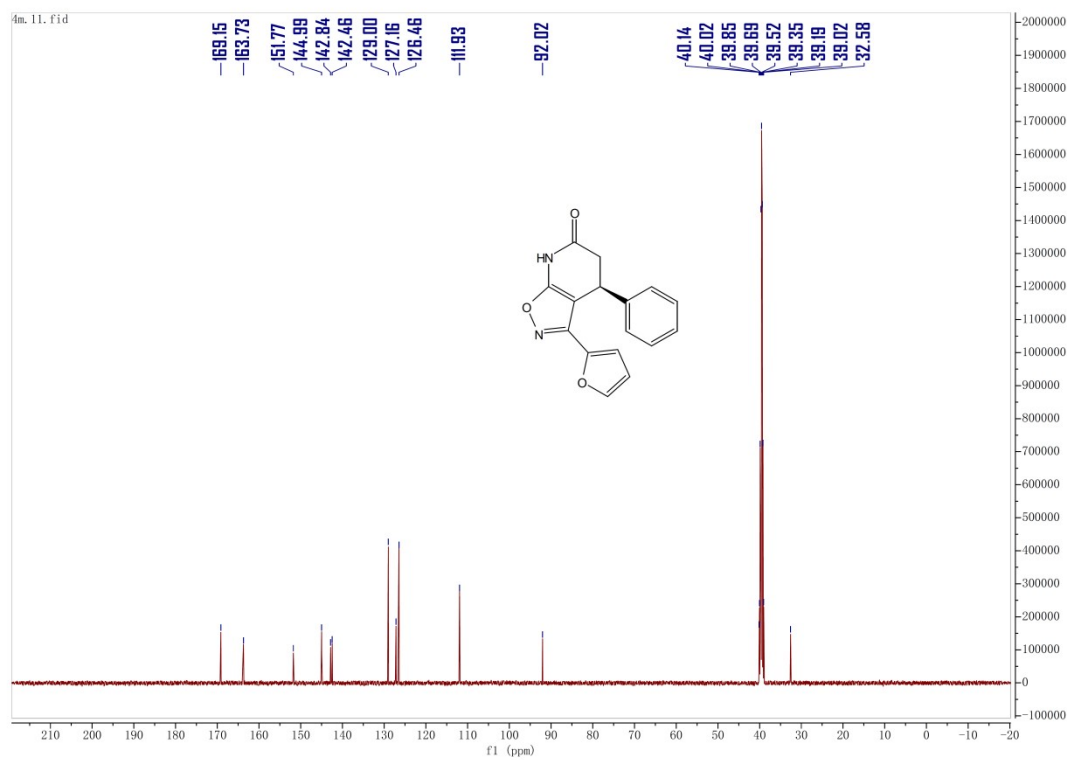

$^{13}\text{C}$  NMR spectrum of **4m**



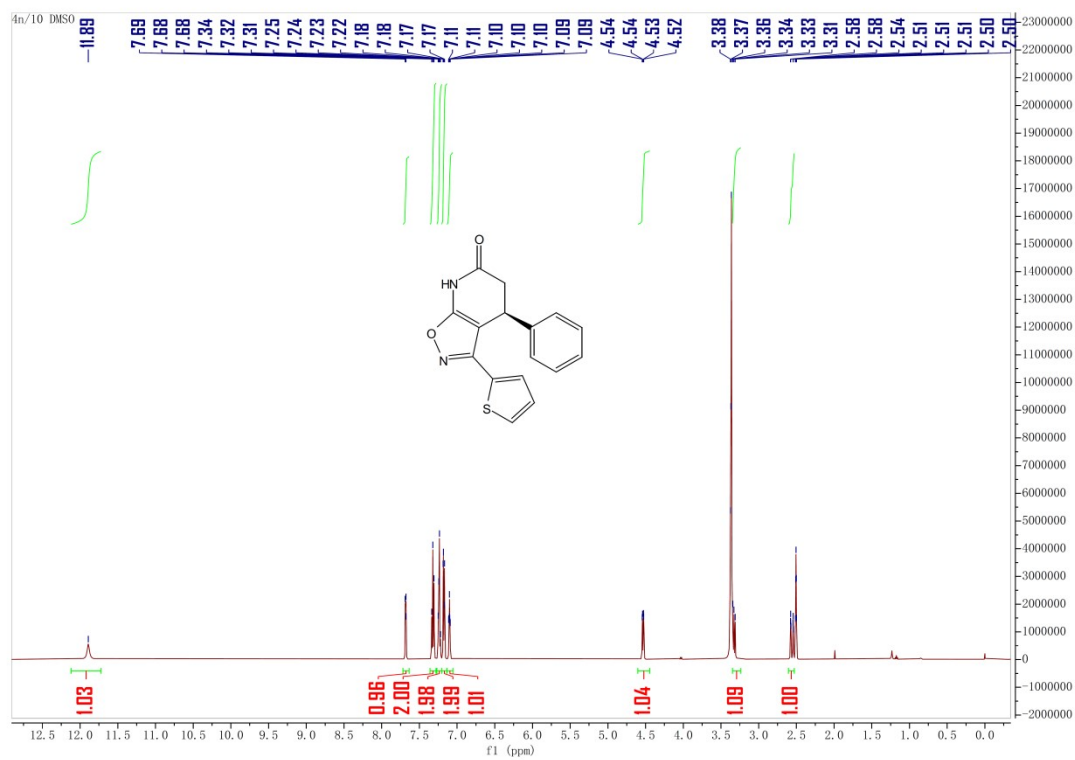

$^1\text{H}$  NMR spectrum of 4n

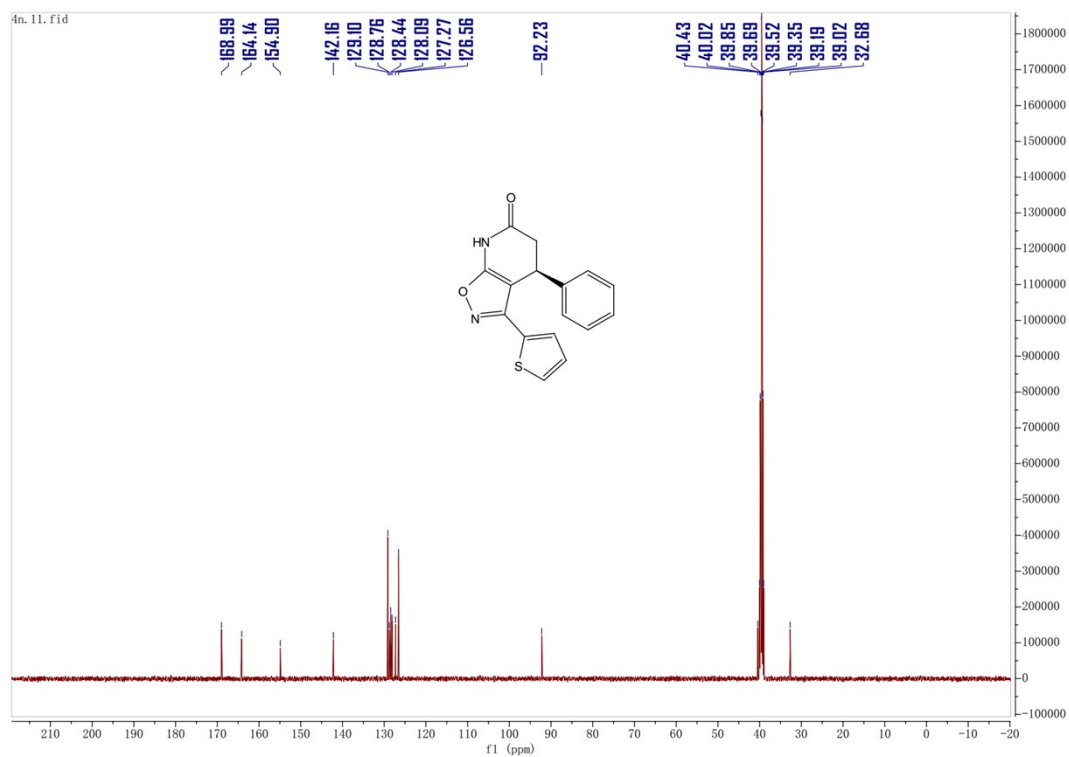

$^{13}\text{C}$  NMR spectrum of 4n

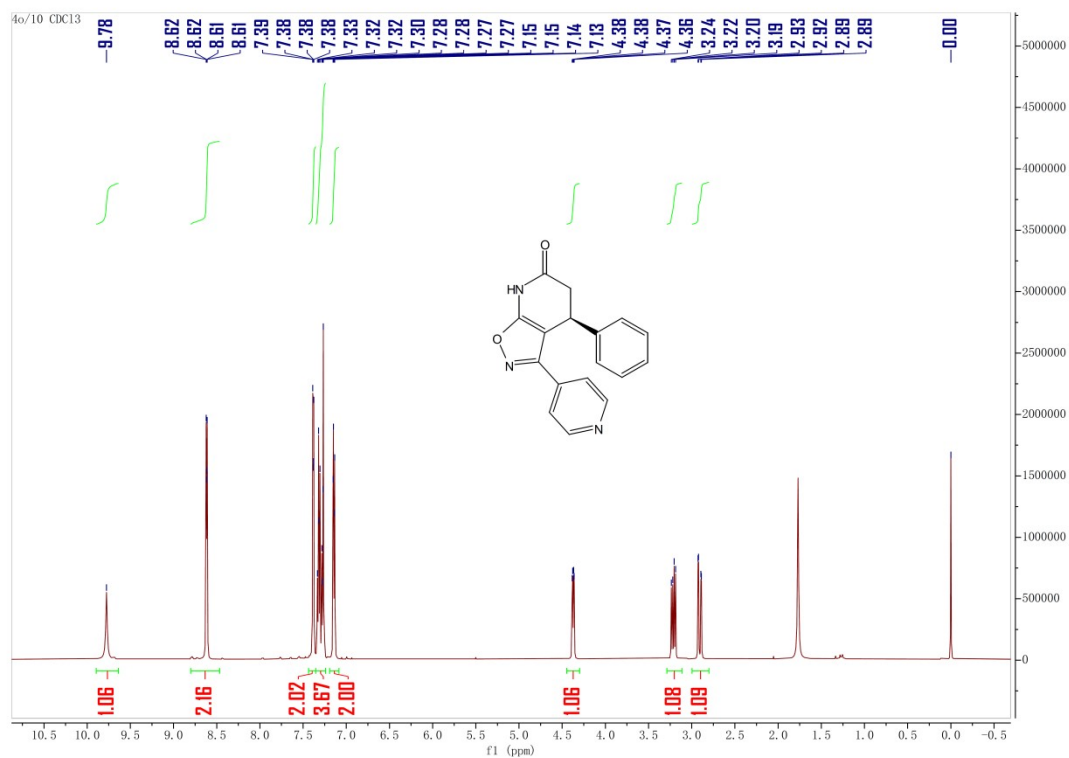

$^1\text{H}$  NMR spectrum of **4o**

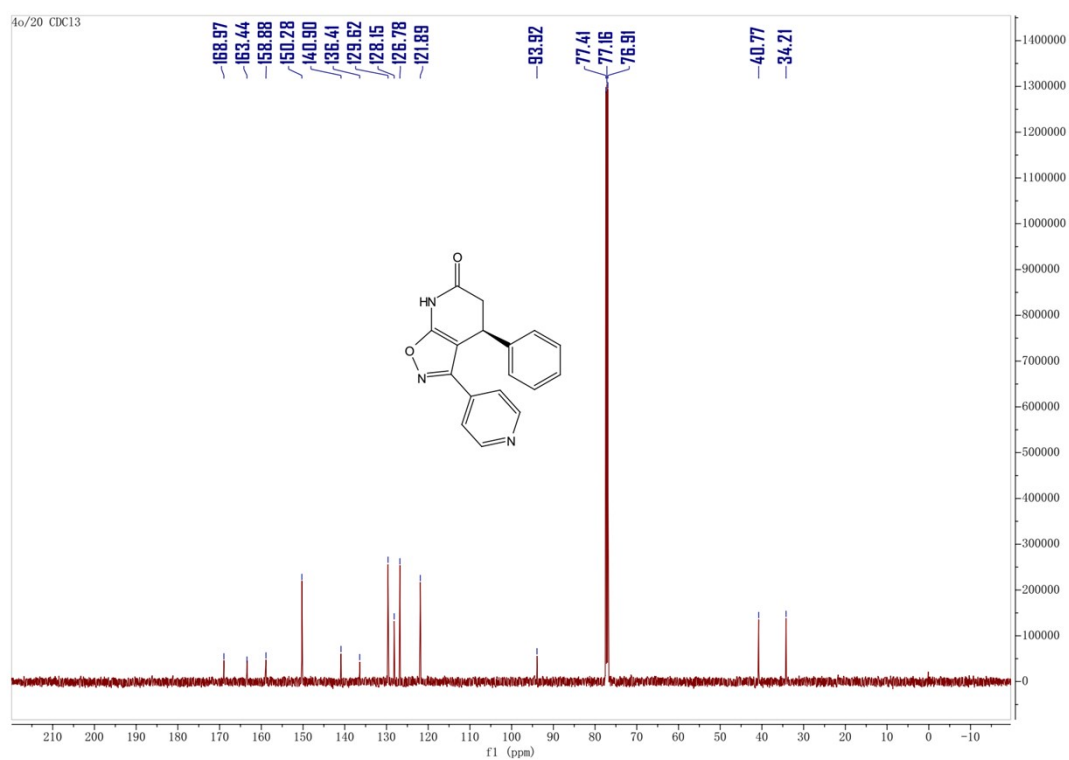

$^{13}\text{C}$  NMR spectrum of **4o**

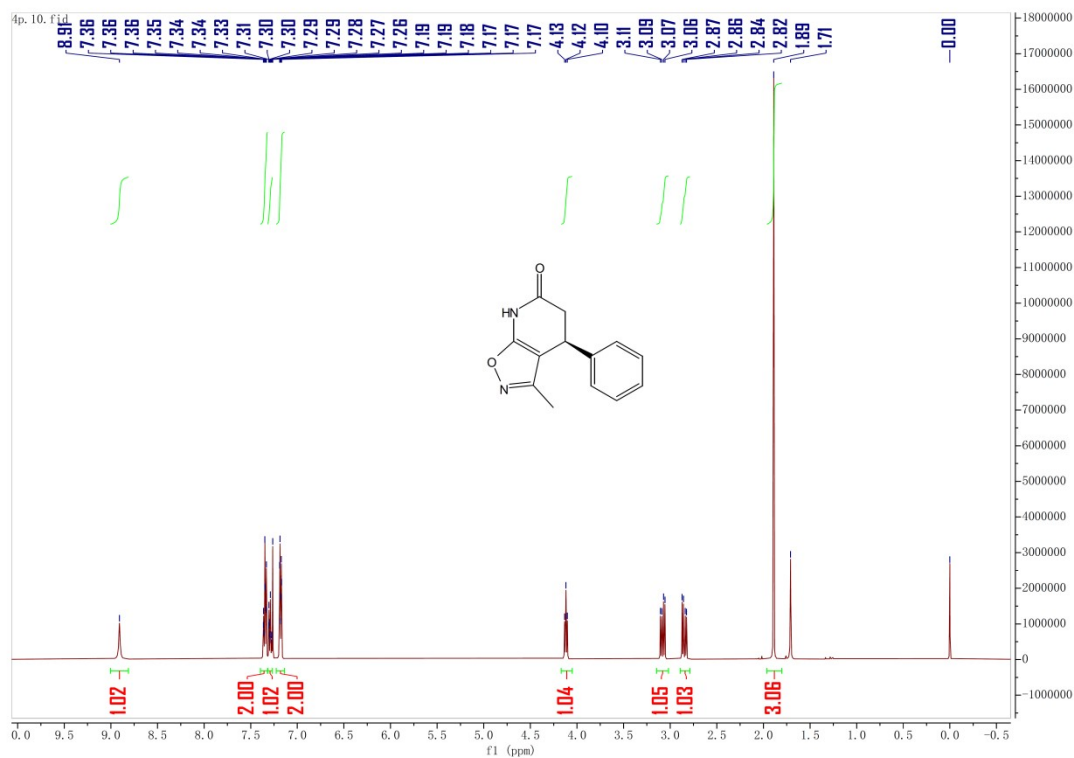

$^1\text{H}$  NMR spectrum of 4p

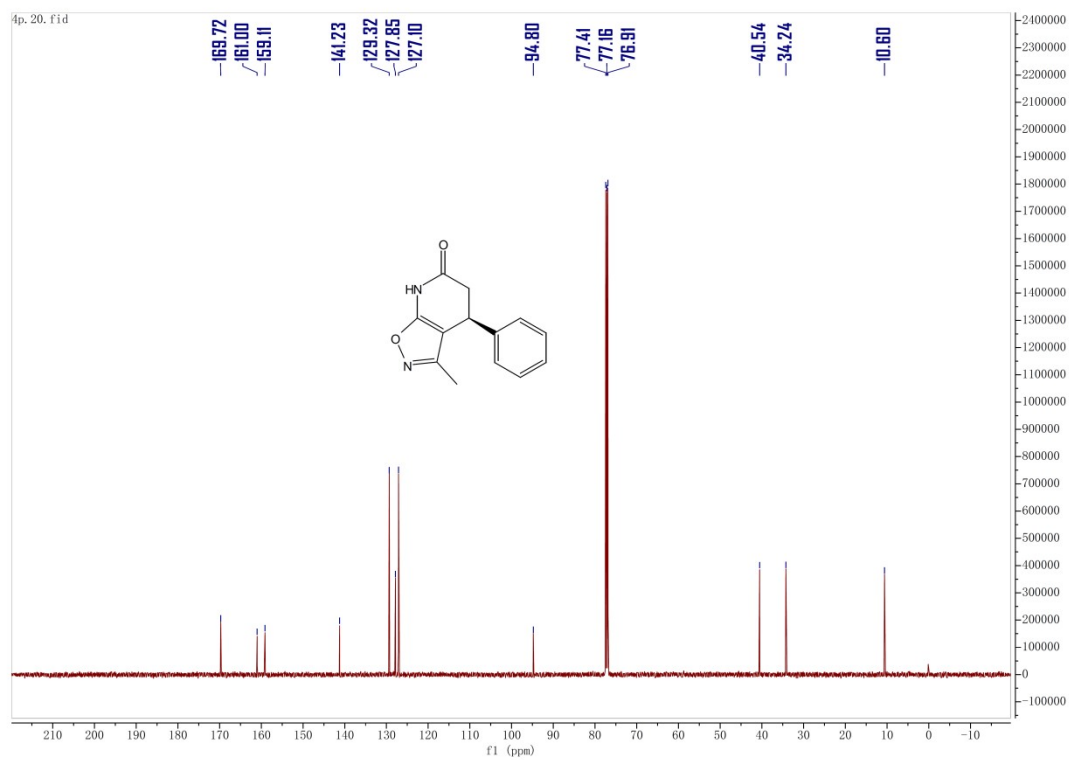

$^{13}\text{C}$  NMR spectrum of 4p

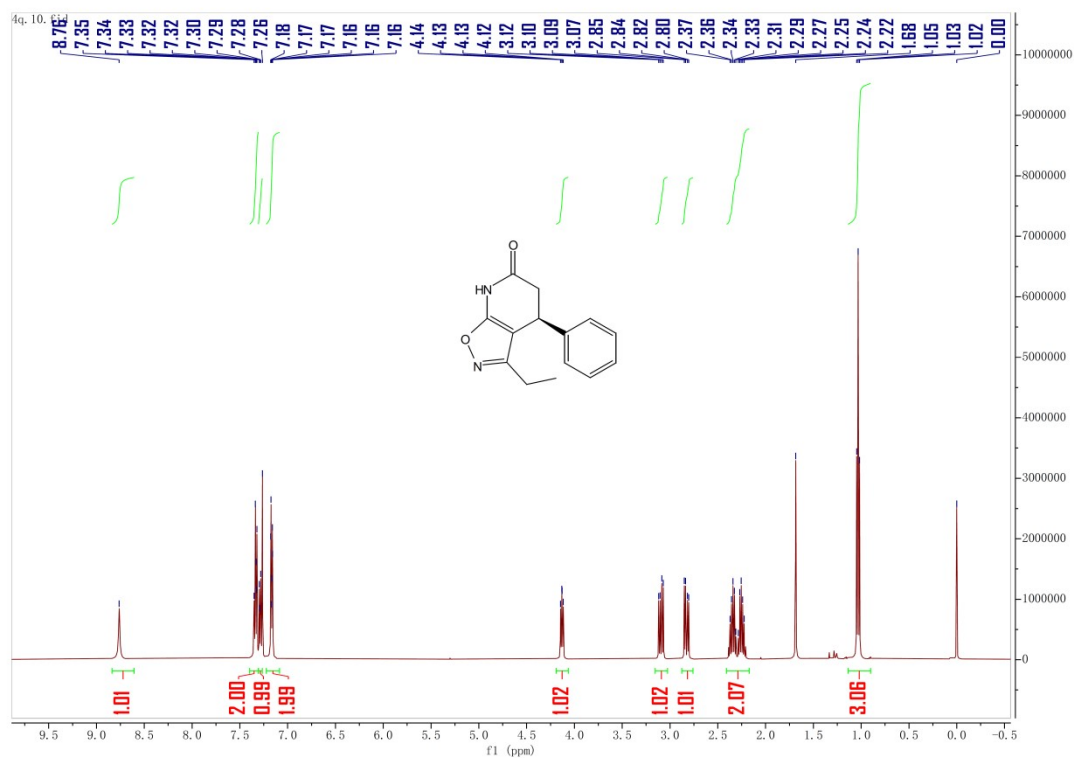

$^1\text{H}$  NMR spectrum of **4q**

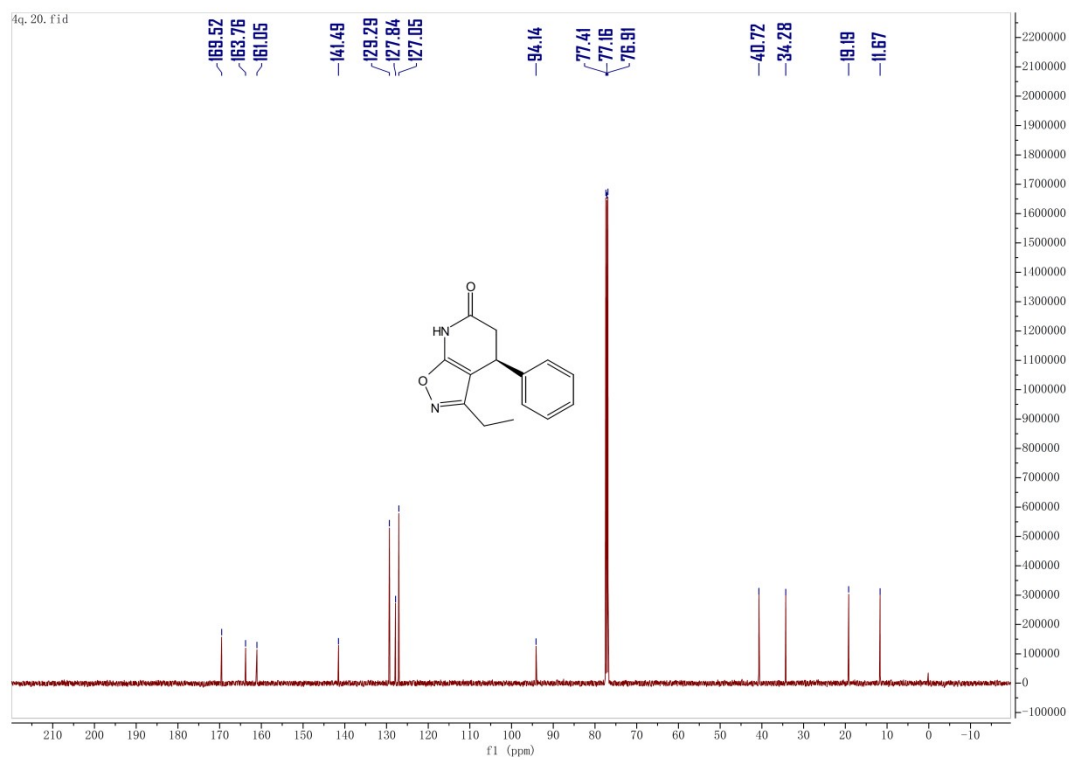

$^{13}\text{C}$  NMR spectrum of **4q**

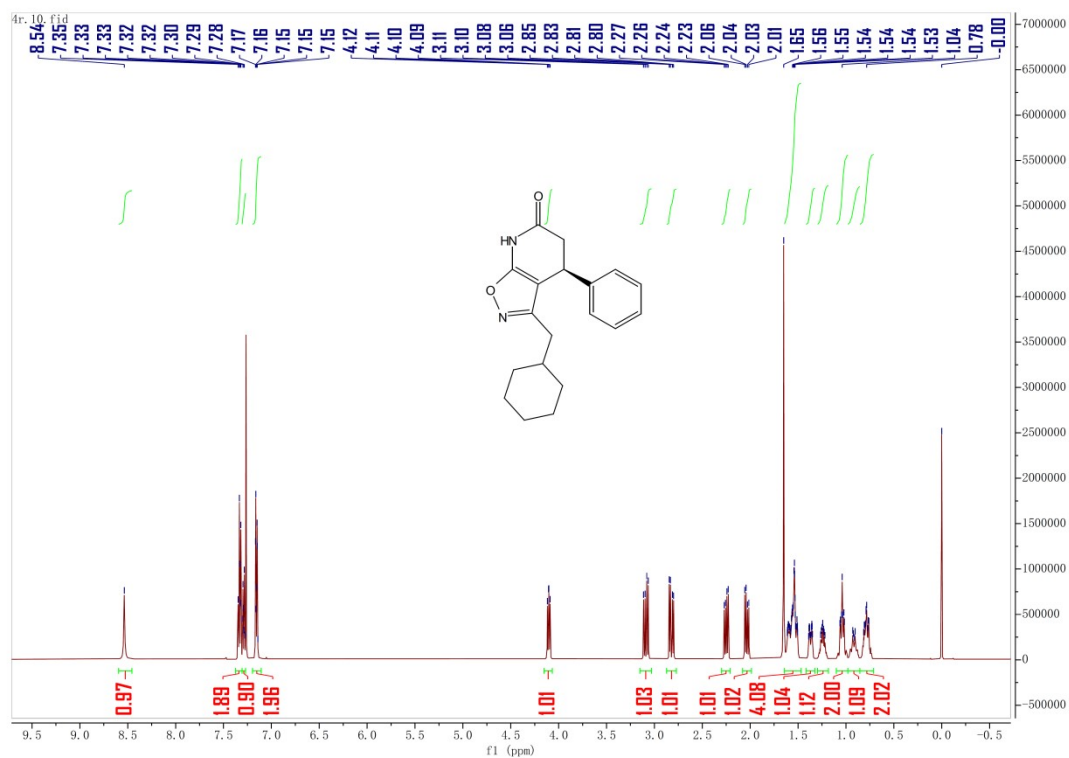

$^1\text{H}$  NMR spectrum of 4r

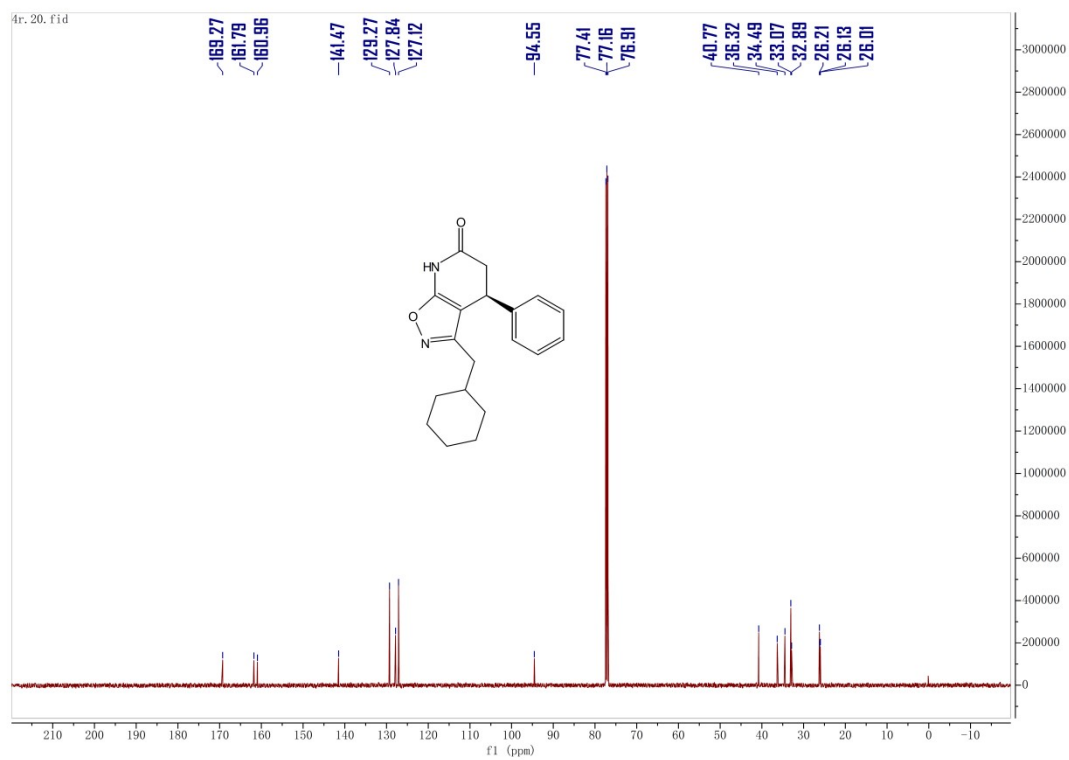

$^{13}\text{C}$  NMR spectrum of 4r

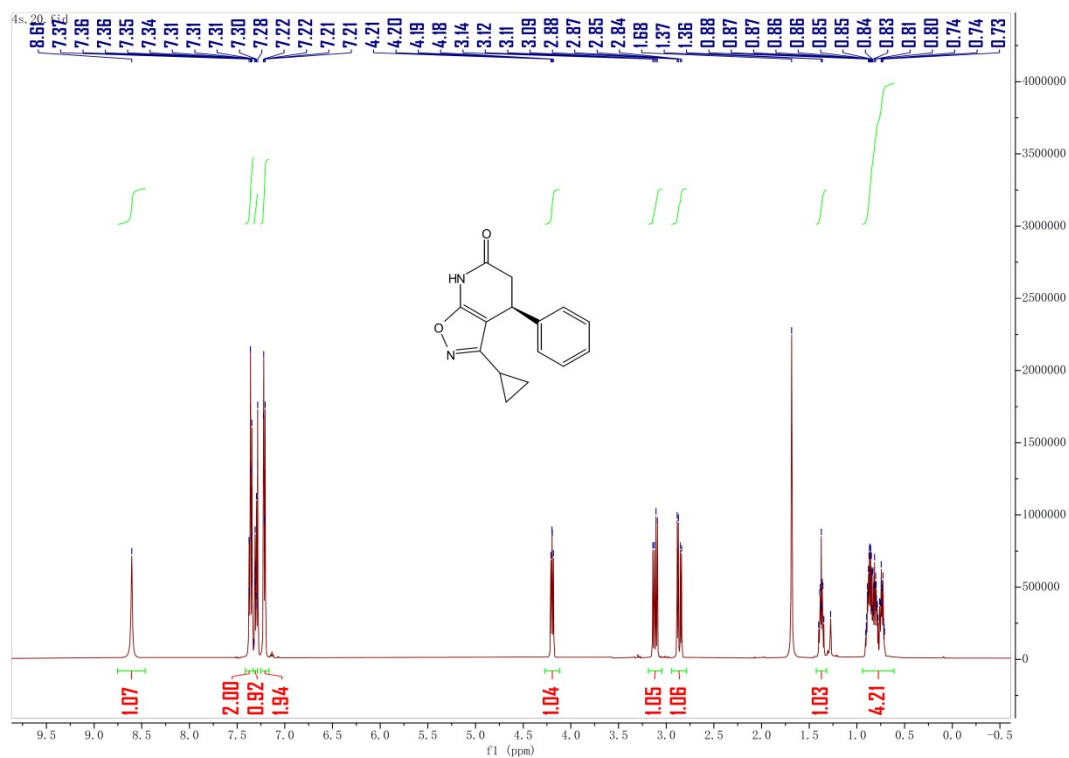

$^1\text{H}$  NMR spectrum of 4s

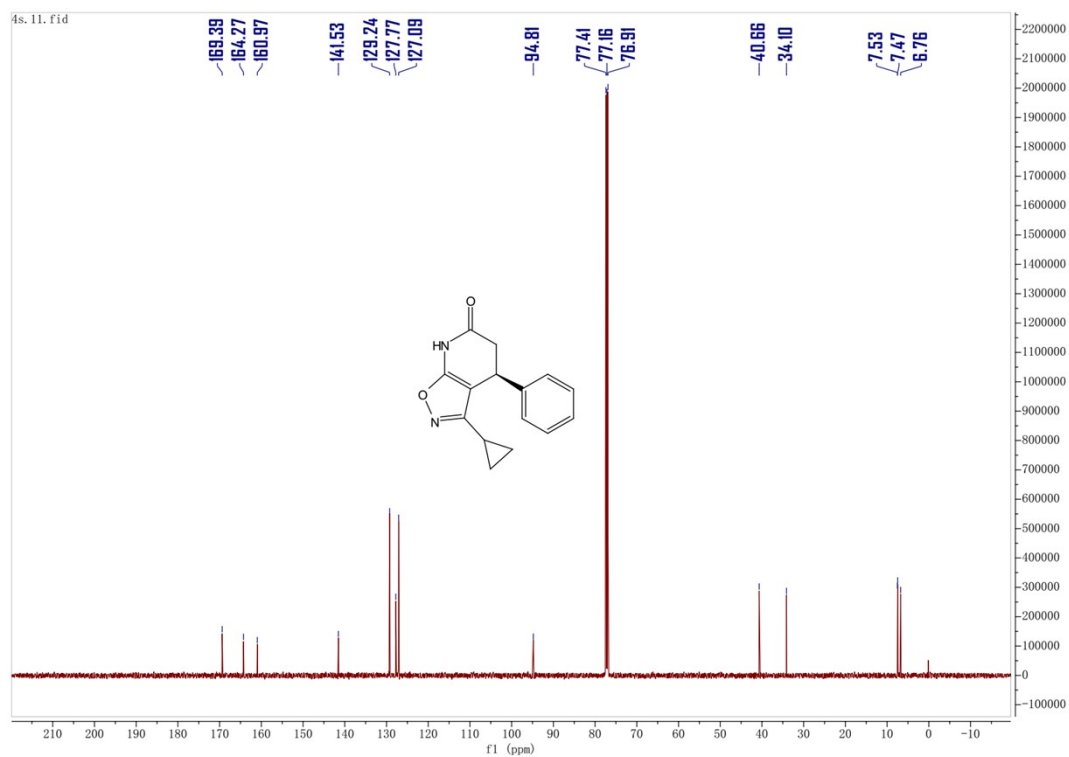

$^{13}\text{C}$  NMR spectrum of 4s

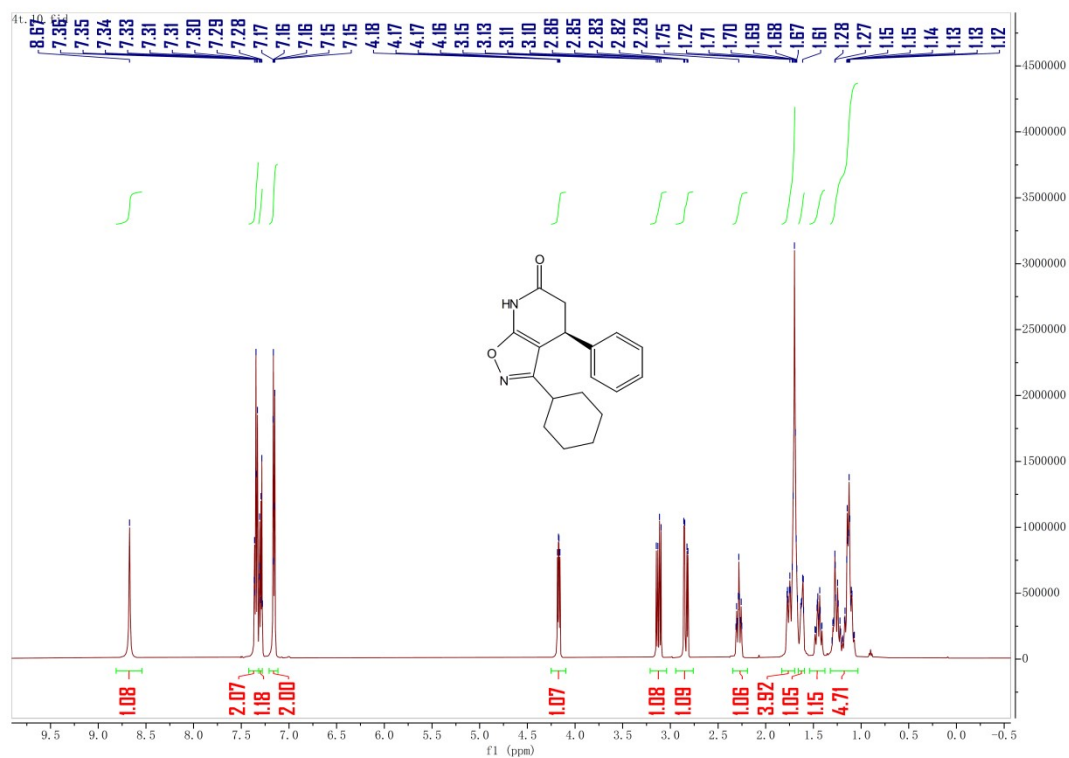

<sup>1</sup>H NMR spectrum of 4t

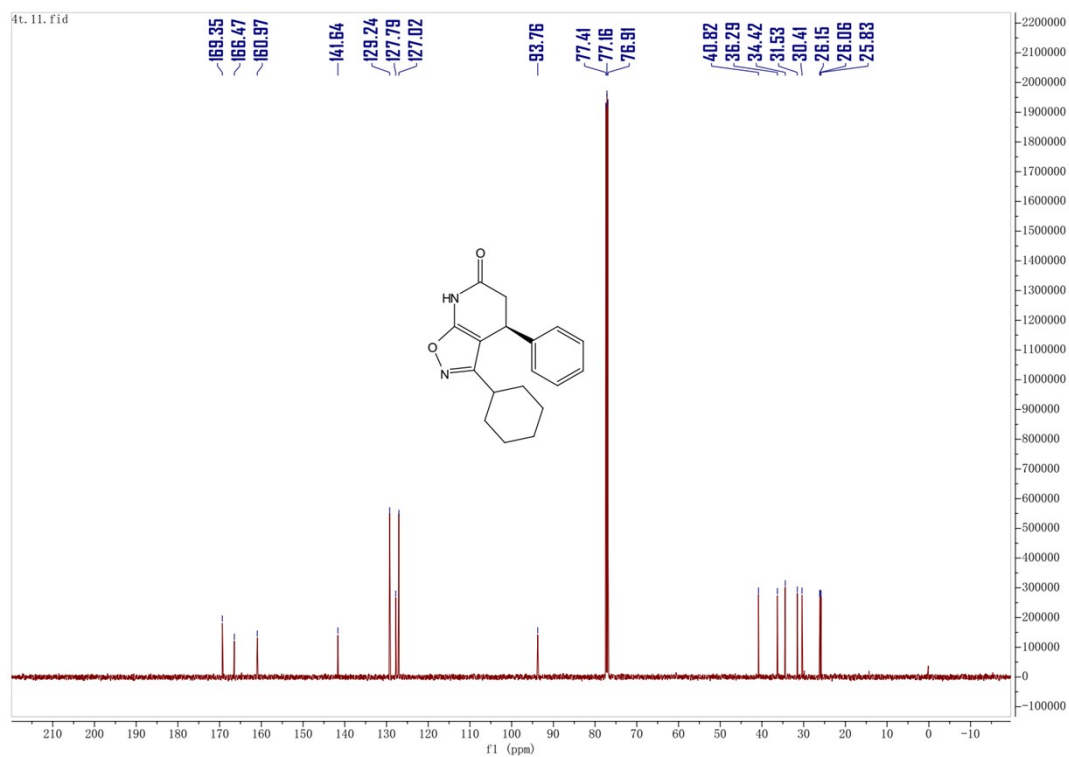

<sup>13</sup>C NMR spectrum of 4t

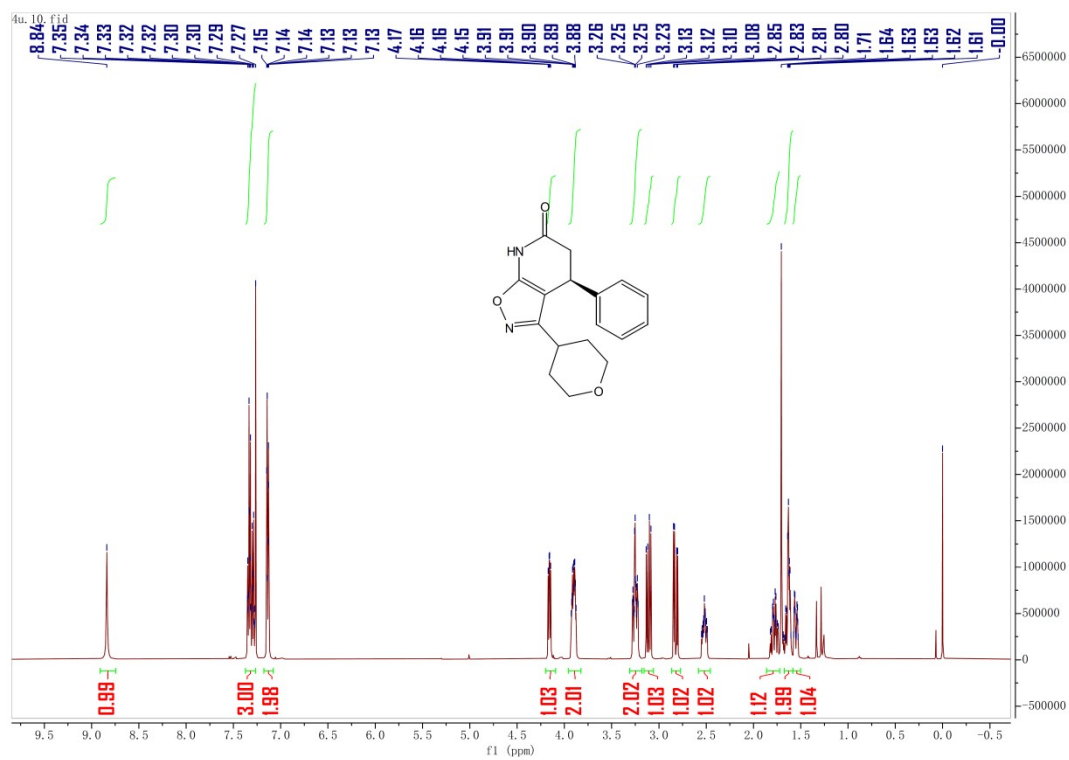

$^1\text{H}$  NMR spectrum of **4u**

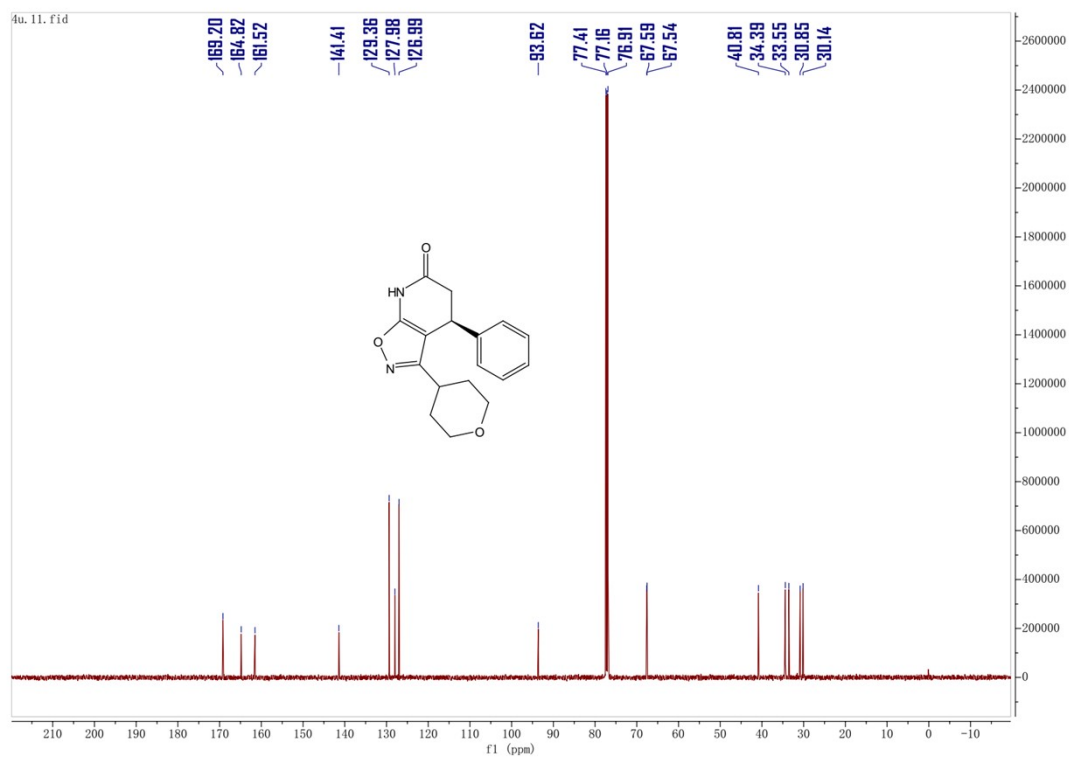

$^{13}\text{C}$  NMR spectrum of **4u**



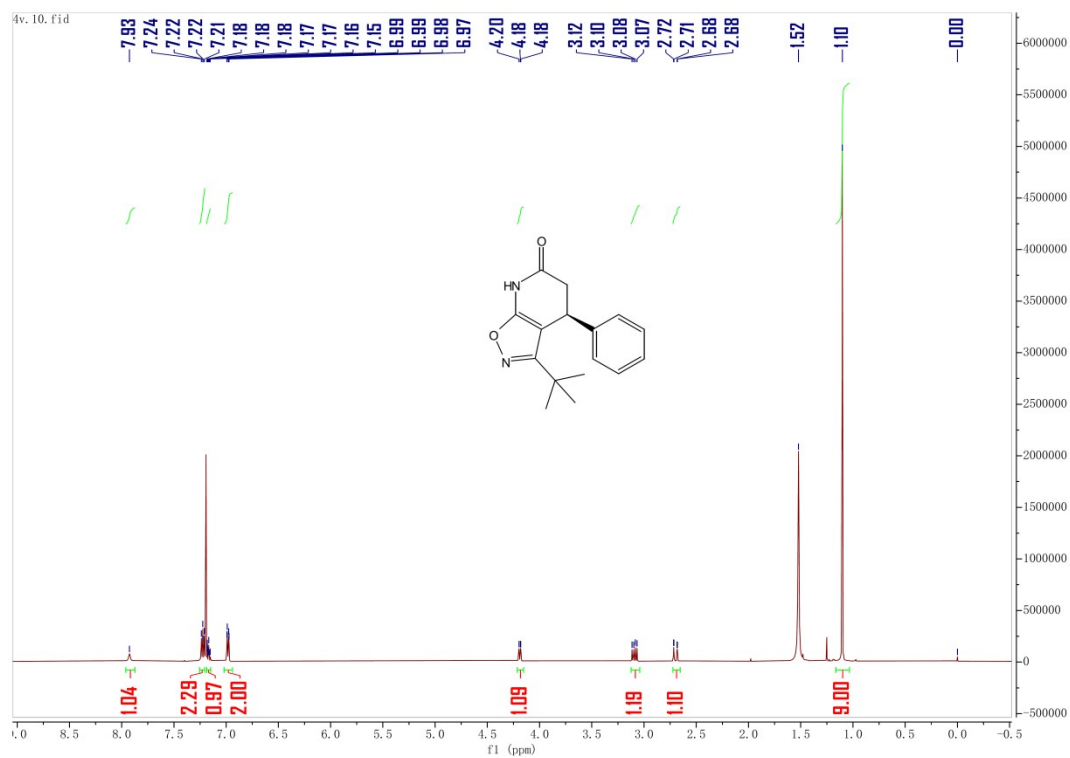

$^1\text{H}$  NMR spectrum of 4v

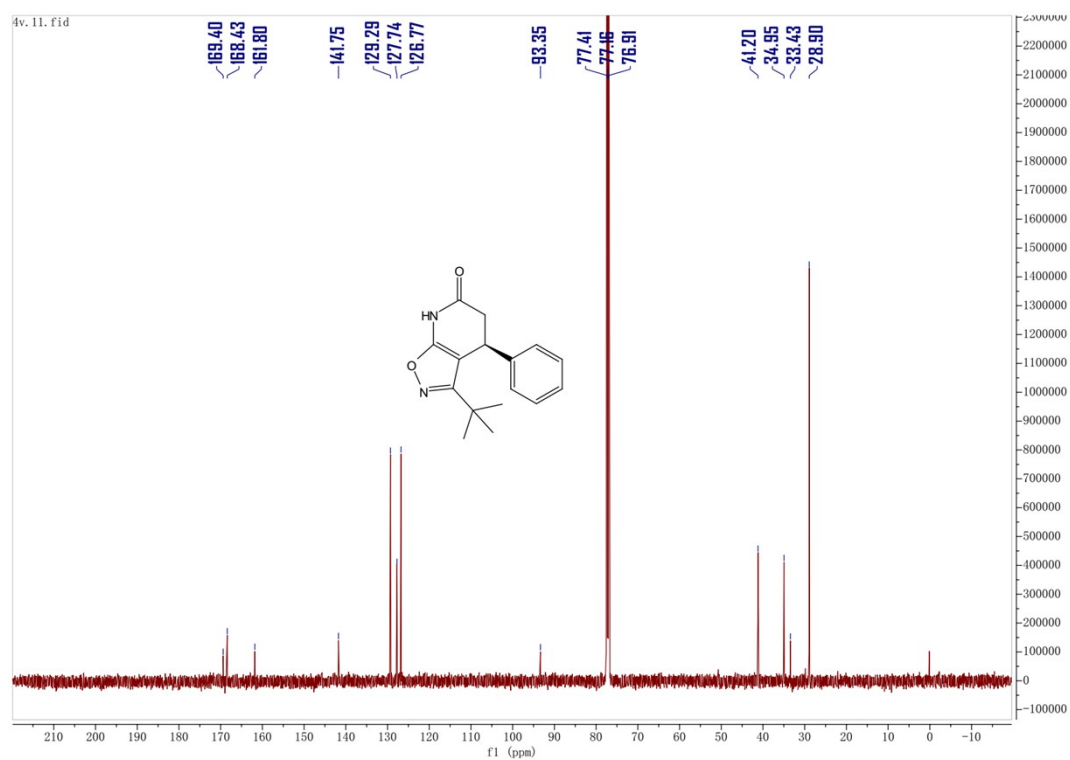

$^{13}\text{C}$  NMR spectrum of 4v

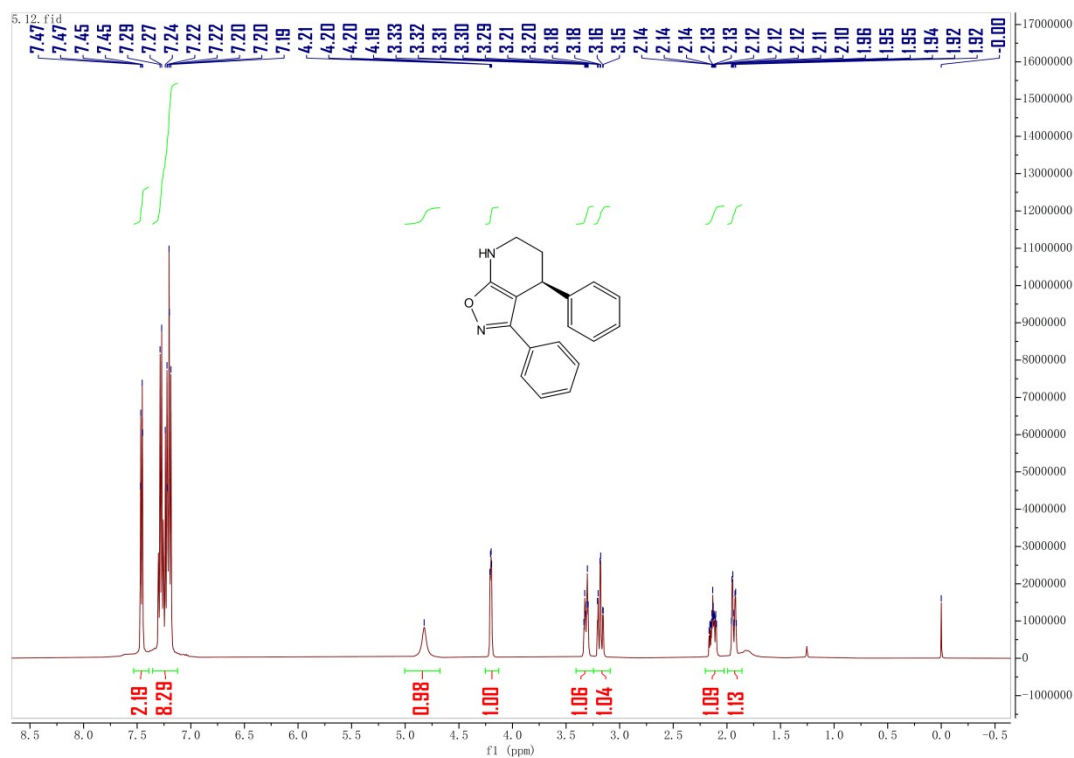

$^1\text{H}$  NMR spectrum of **5**

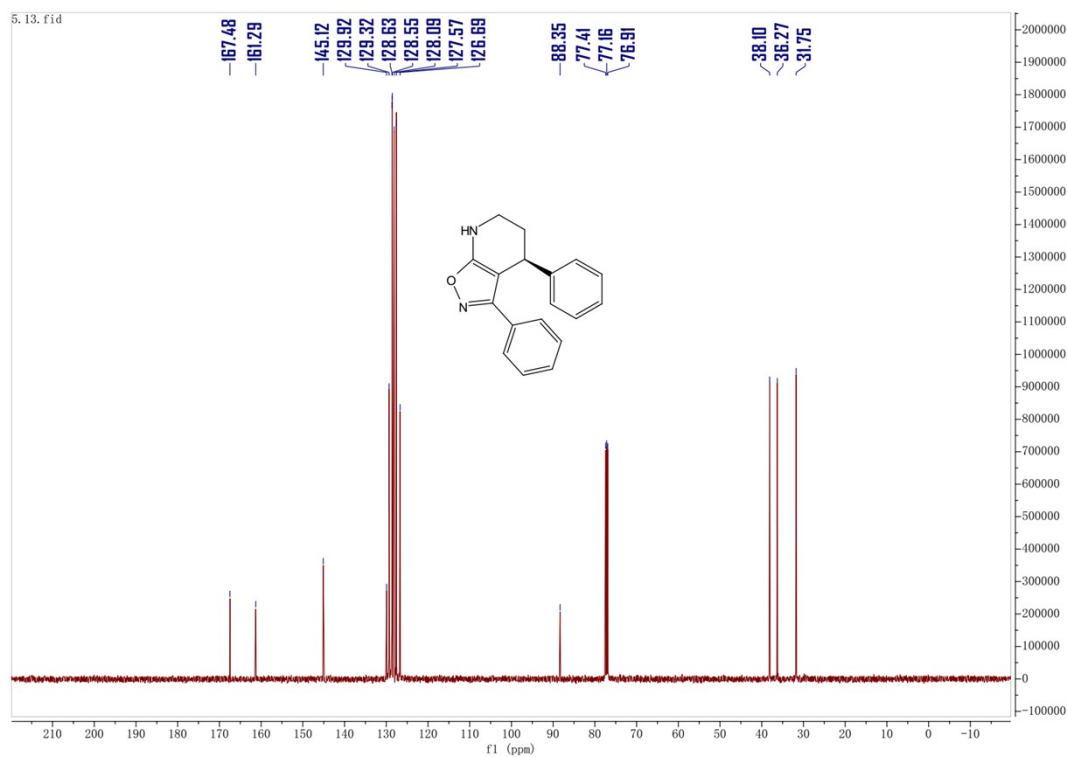

$^{13}\text{C}$  NMR spectrum of **5**

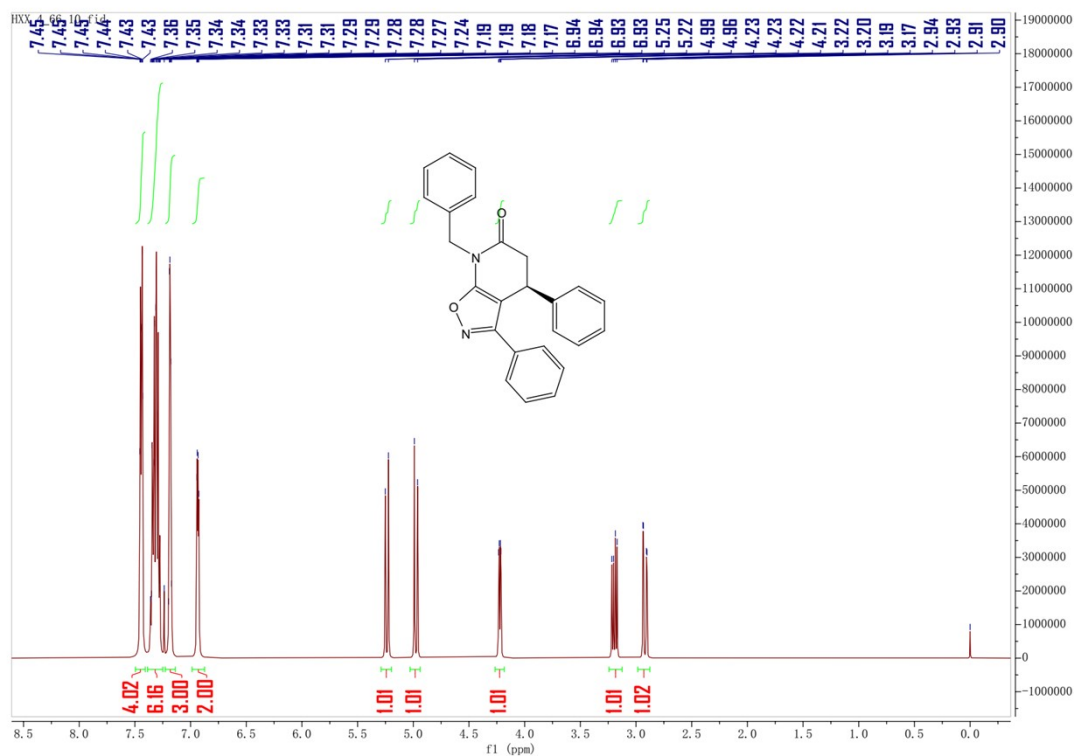

$^1\text{H}$  NMR spectrum of **6**

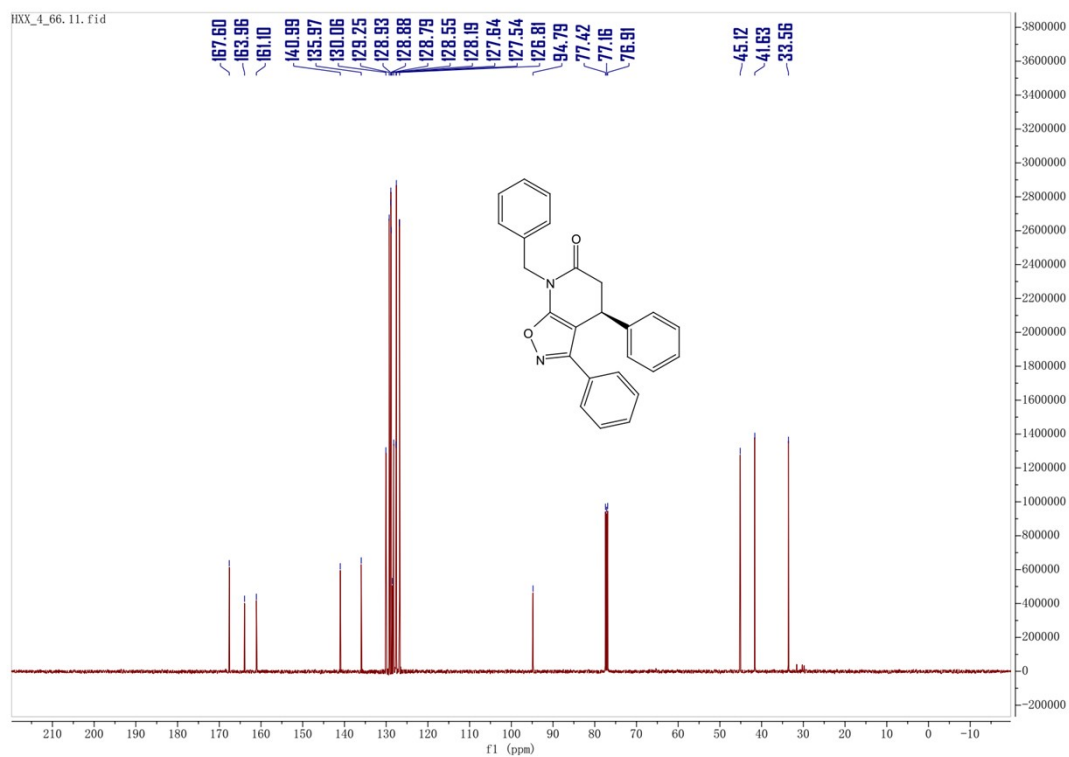

$^{13}\text{C}$  NMR spectrum of **6**

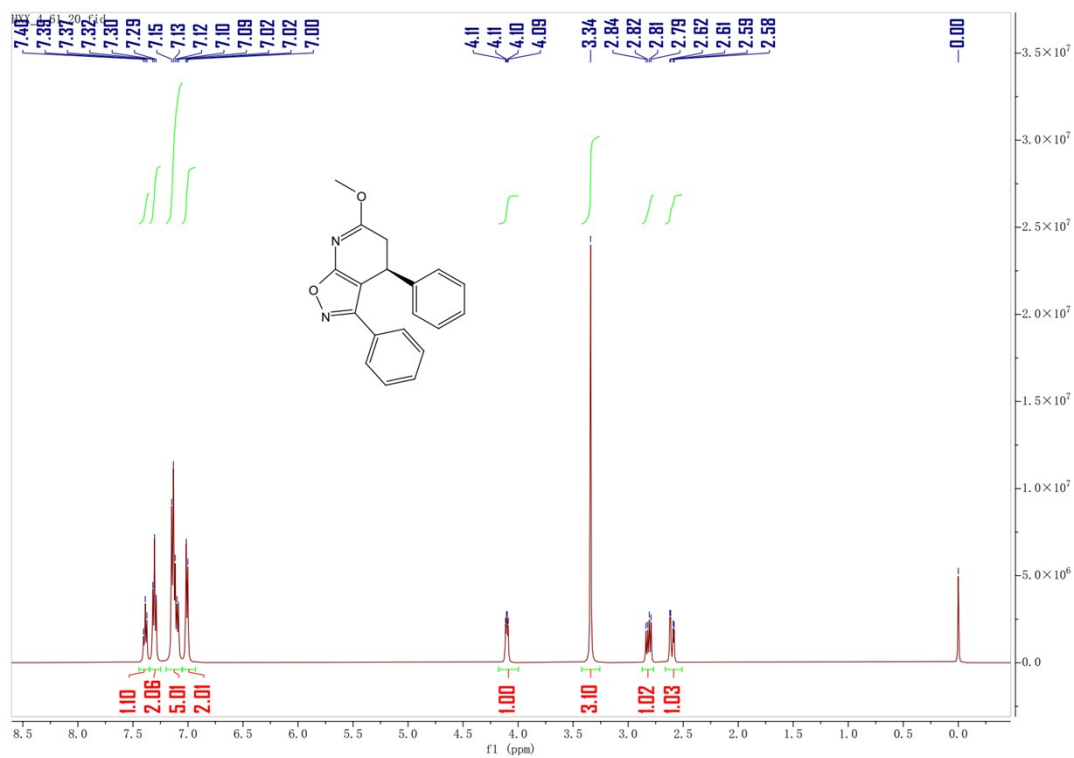

<sup>1</sup>H NMR spectrum of 7

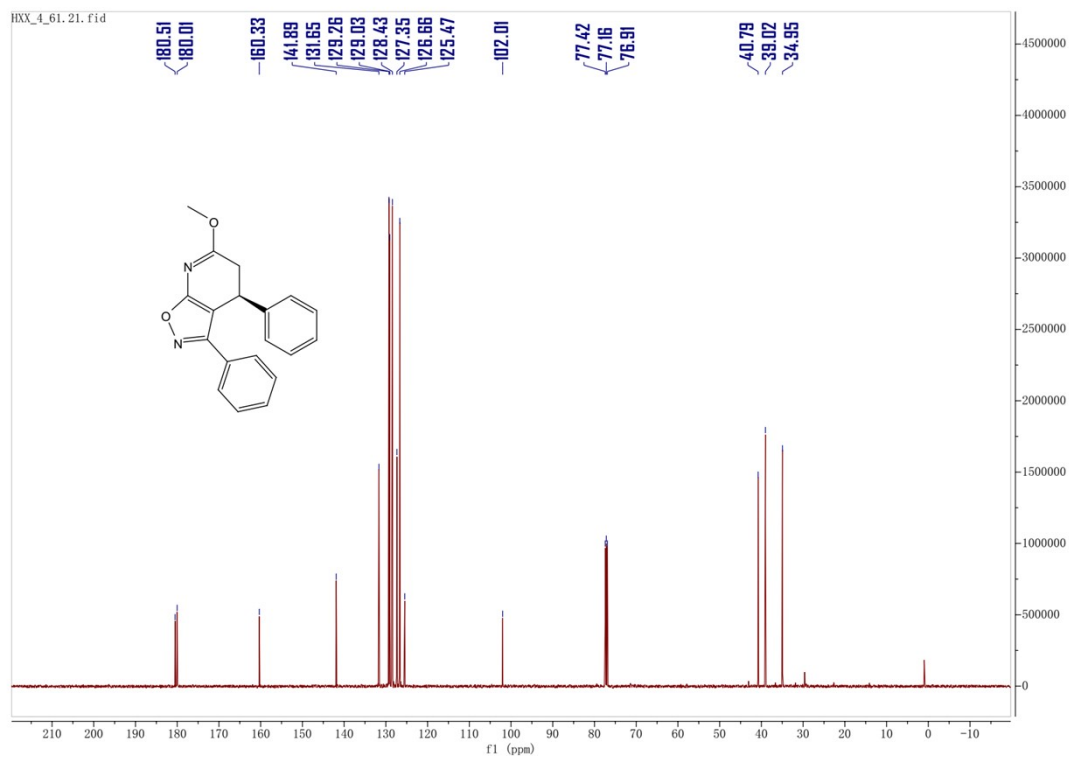

<sup>13</sup>C NMR spectrum of 7

## 8. HPLC Chromatograms

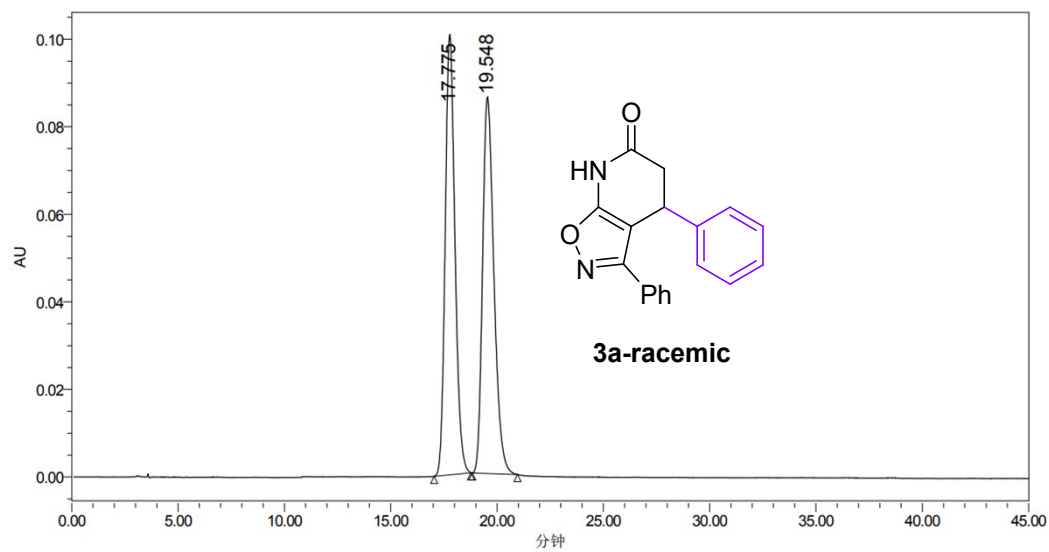

| Peak  | Ret.Time | Area    | Height | Area%  | Height% |
|-------|----------|---------|--------|--------|---------|
| 1     | 17.775   | 3191204 | 100549 | 50.03  | 53.90   |
| 2     | 19.548   | 3187240 | 86002  | 49.97  | 46.10   |
| Total |          | 6378444 | 186551 | 100.00 | 100.00  |

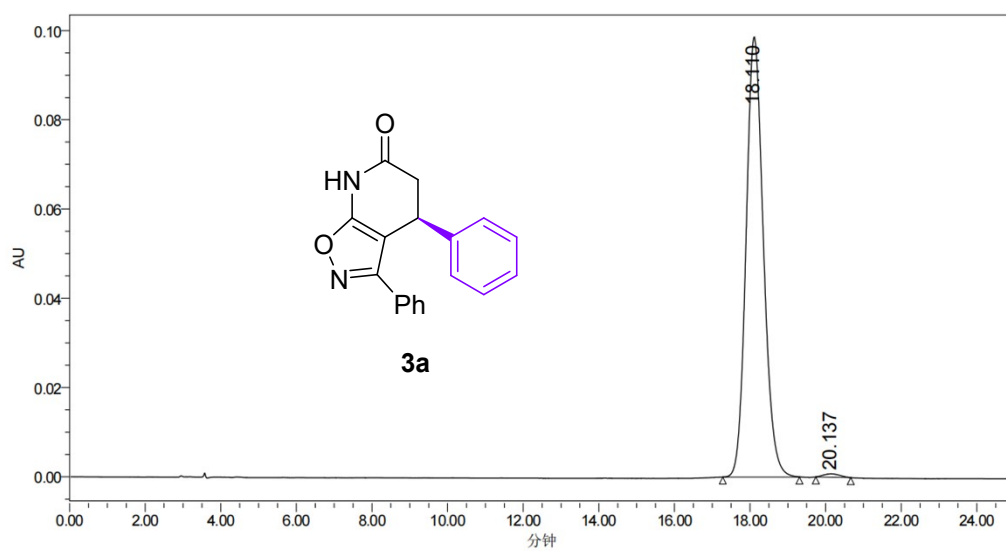

| Peak  | Ret.Time | Area    | Height | Area%  | Height% |
|-------|----------|---------|--------|--------|---------|
| 1     | 18.110   | 3140860 | 98578  | 99.30  | 99.24   |
| 2     | 20.137   | 22284   | 753    | 0.70   | 0.76    |
| Total |          | 3163144 | 99331  | 100.00 | 100.00  |

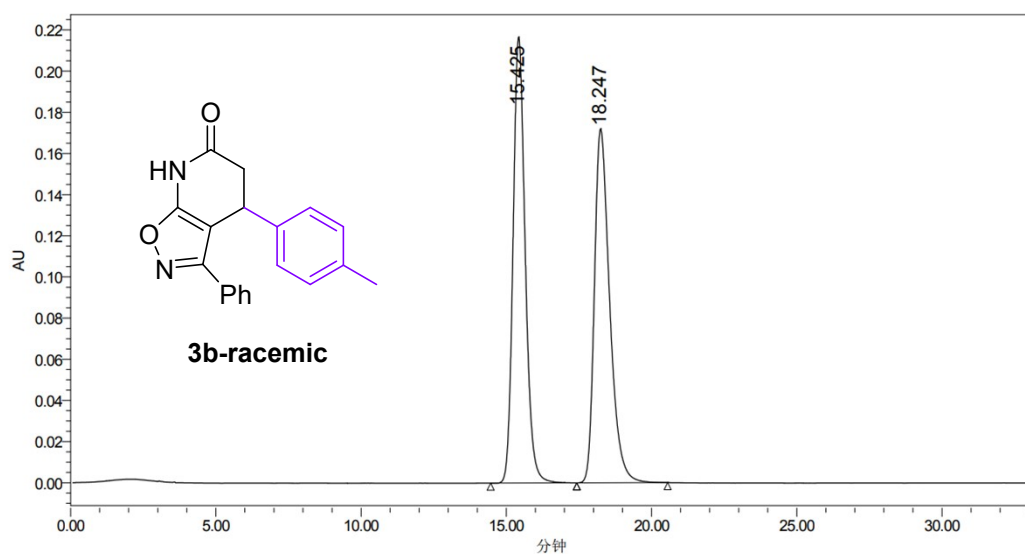

| Peak  | Ret.Time | Area     | Height | Area%  | Height% |
|-------|----------|----------|--------|--------|---------|
| 1     | 15.425   | 6299042  | 216776 | 50.08  | 55.75   |
| 2     | 18.247   | 6278738  | 172049 | 49.92  | 44.25   |
| Total |          | 12577780 | 388825 | 100.00 | 100.00  |

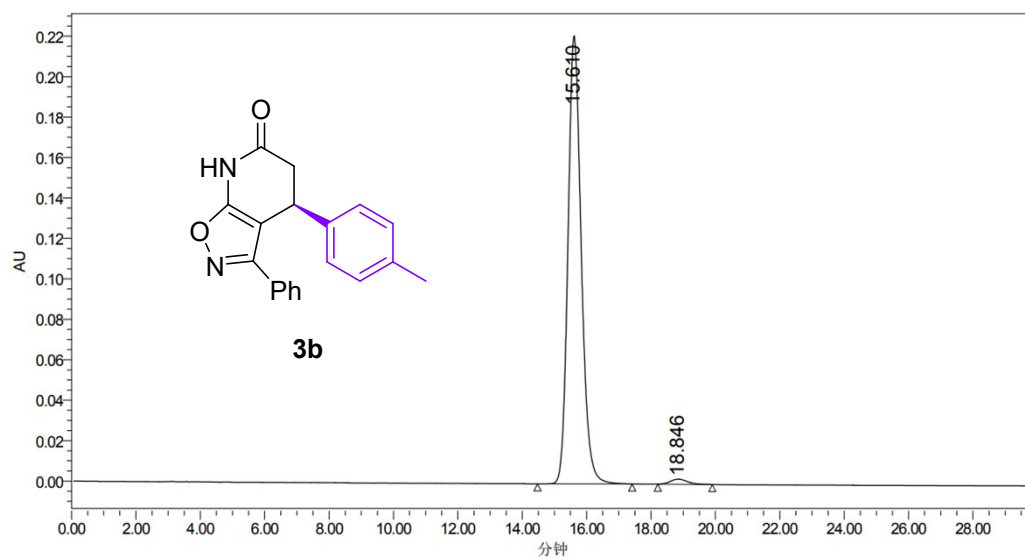

| Peak  | Ret.Time | Area    | Height | Area%  | Height% |
|-------|----------|---------|--------|--------|---------|
| 1     | 15.610   | 6331856 | 221380 | 98.56  | 98.88   |
| 2     | 18.846   | 92683   | 2515   | 1.44   | 1.12    |
| Total |          | 6424539 | 223895 | 100.00 | 100.00  |

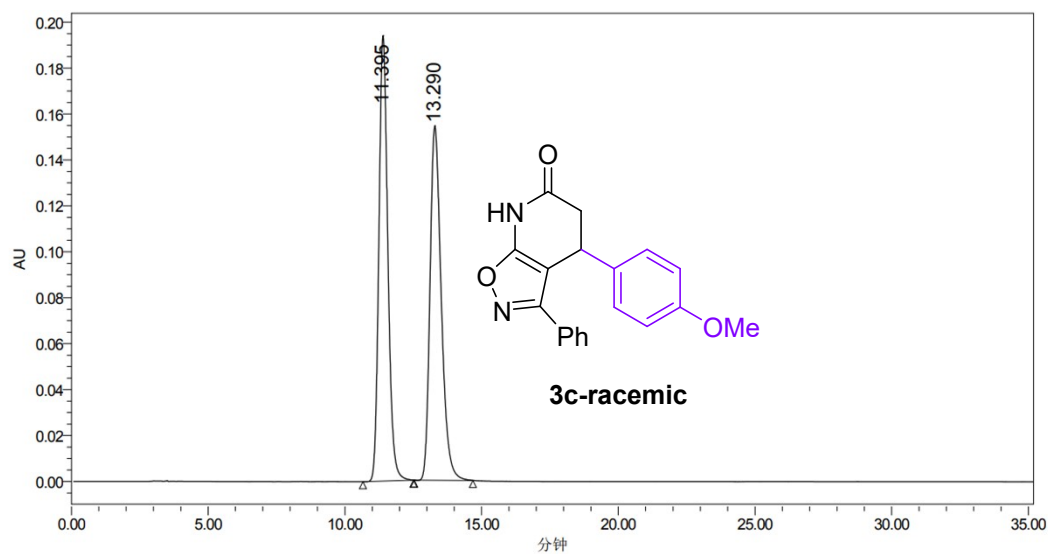

| Peak  | Ret.Time | Area    | Height | Area%  | Height% |
|-------|----------|---------|--------|--------|---------|
| 1     | 11.395   | 4417859 | 193976 | 50.14  | 55.68   |
| 2     | 13.290   | 4393973 | 154386 | 49.86  | 44.32   |
| Total |          | 8811832 | 348362 | 100.00 | 100.00  |

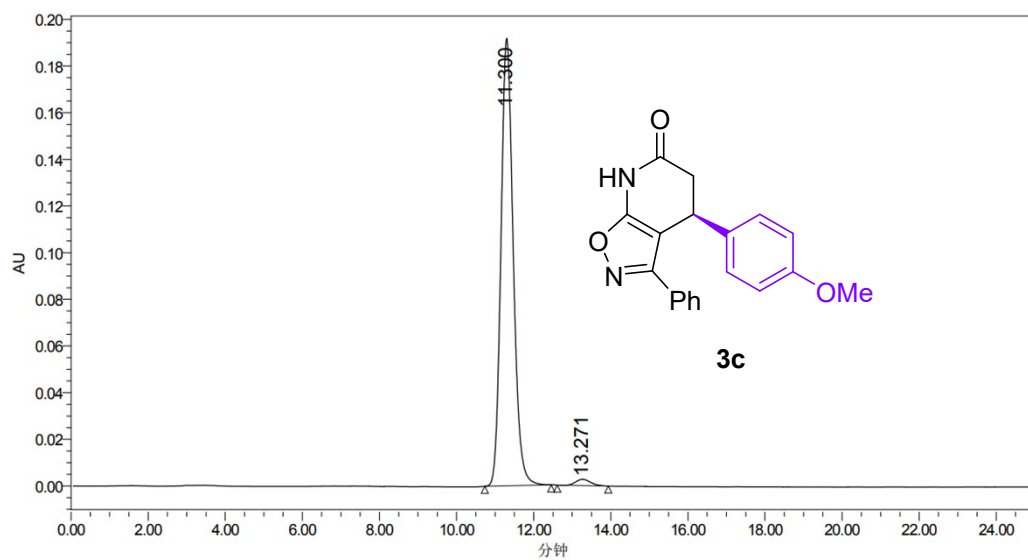

| Peak  | Ret.Time | Area    | Height | Area%  | Height% |
|-------|----------|---------|--------|--------|---------|
| 1     | 11.300   | 4237595 | 191740 | 98.31  | 98.61   |
| 2     | 13.271   | 72868   | 2696   | 1.69   | 1.39    |
| Total |          | 4310463 | 194436 | 100.00 | 100.00  |

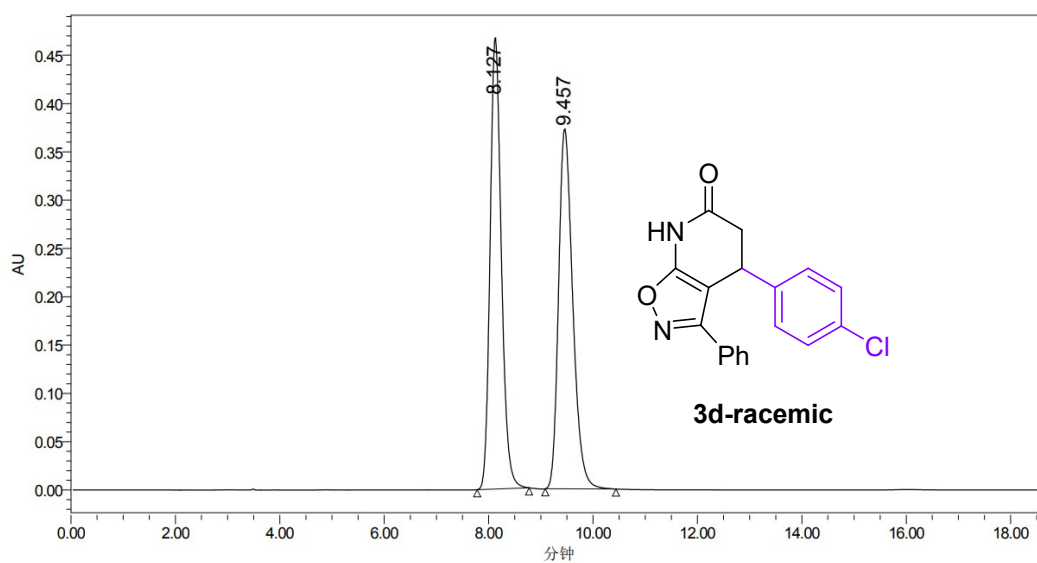

| Peak  | Ret.Time | Area     | Height | Area%  | Height% |
|-------|----------|----------|--------|--------|---------|
| 1     | 8.127    | 6995249  | 466998 | 49.91  | 55.65   |
| 2     | 9.457    | 7019254  | 372242 | 50.09  | 44.35   |
| Total |          | 14014503 | 839240 | 100.00 | 100.00  |

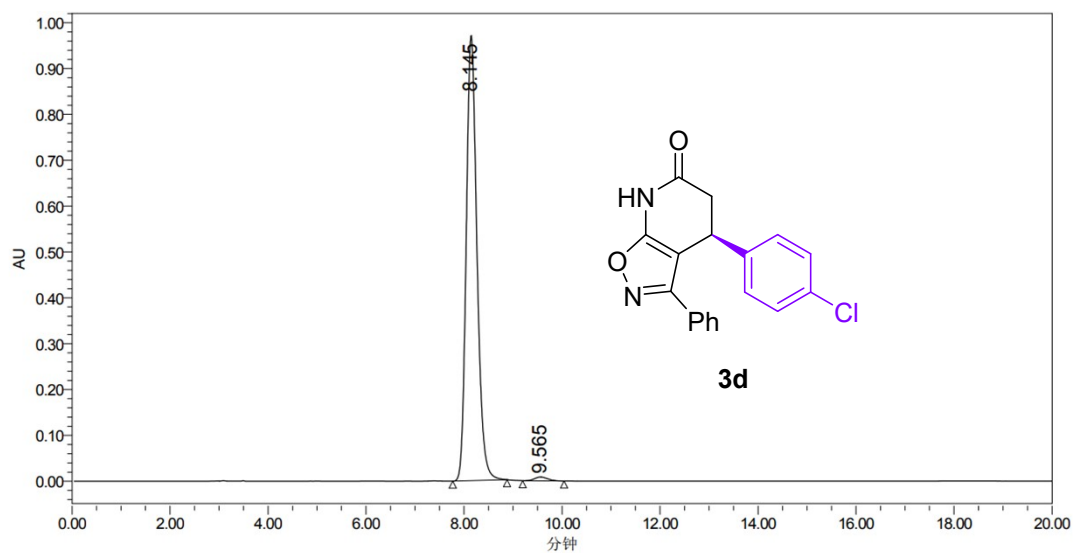

| Peak  | Ret.Time | Area     | Height | Area%  | Height% |
|-------|----------|----------|--------|--------|---------|
| 1     | 8.145    | 14690057 | 970288 | 98.99  | 99.16   |
| 2     | 9.565    | 150504   | 8207   | 1.01   | 0.84    |
| Total |          | 14840561 | 978495 | 100.00 | 100.00  |



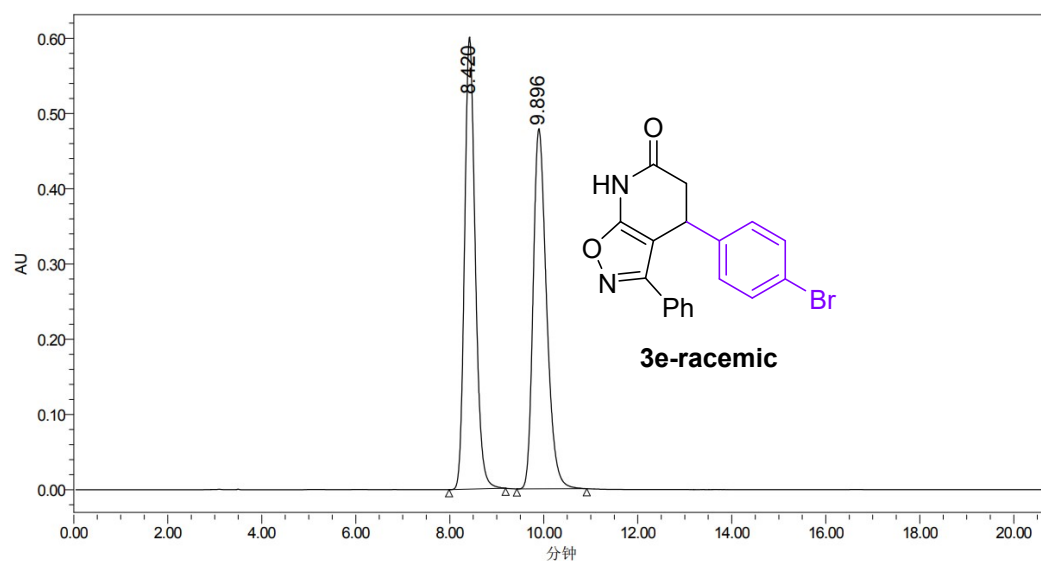

| Peak  | Ret.Time | Area     | Height  | Area%  | Height% |
|-------|----------|----------|---------|--------|---------|
| 1     | 8.420    | 9478336  | 600493  | 49.98  | 55.66   |
| 2     | 9.896    | 9484897  | 478348  | 50.02  | 44.34   |
| Total |          | 18963233 | 1078841 | 100.00 | 100.00  |

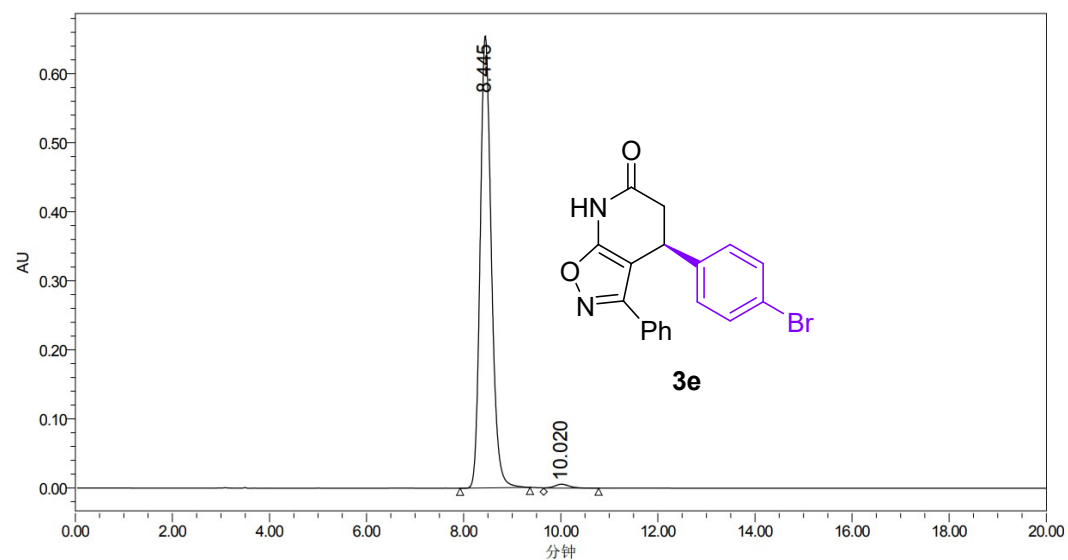

| Peak  | Ret.Time | Area     | Height | Area%  | Height% |
|-------|----------|----------|--------|--------|---------|
| 1     | 8.445    | 10441871 | 654455 | 98.84  | 99.14   |
| 2     | 10.020   | 122695   | 5647   | 1.16   | 0.86    |
| Total |          | 10564566 | 660102 | 100.00 | 100.00  |

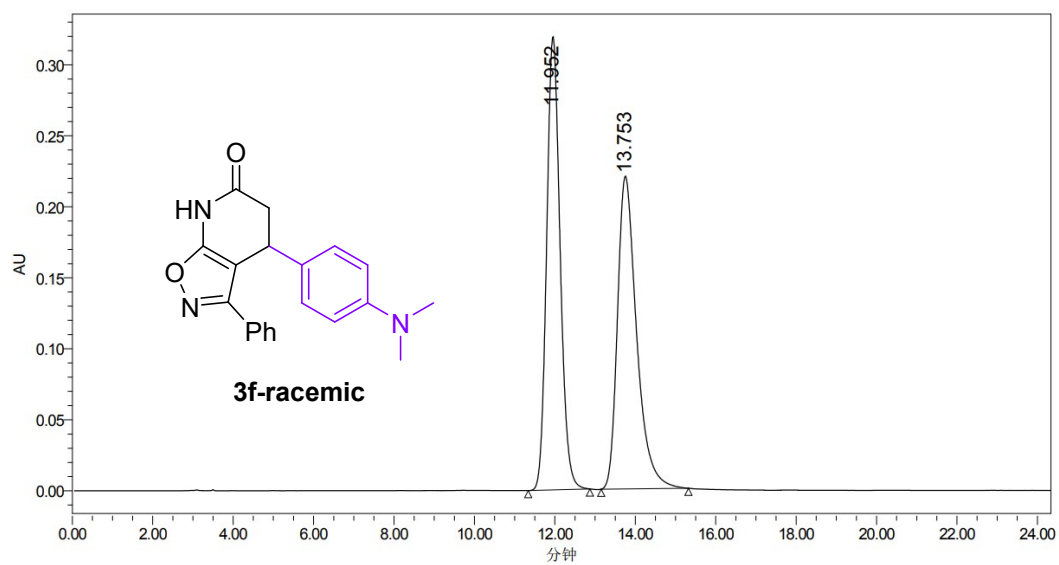

| Peak  | Ret.Time | Area     | Height | Area%  | Height% |
|-------|----------|----------|--------|--------|---------|
| 1     | 11.952   | 7418534  | 319044 | 50.49  | 59.18   |
| 2     | 13.753   | 7275266  | 220088 | 49.51  | 40.82   |
| Total |          | 14693800 | 539132 | 100.00 | 100.00  |

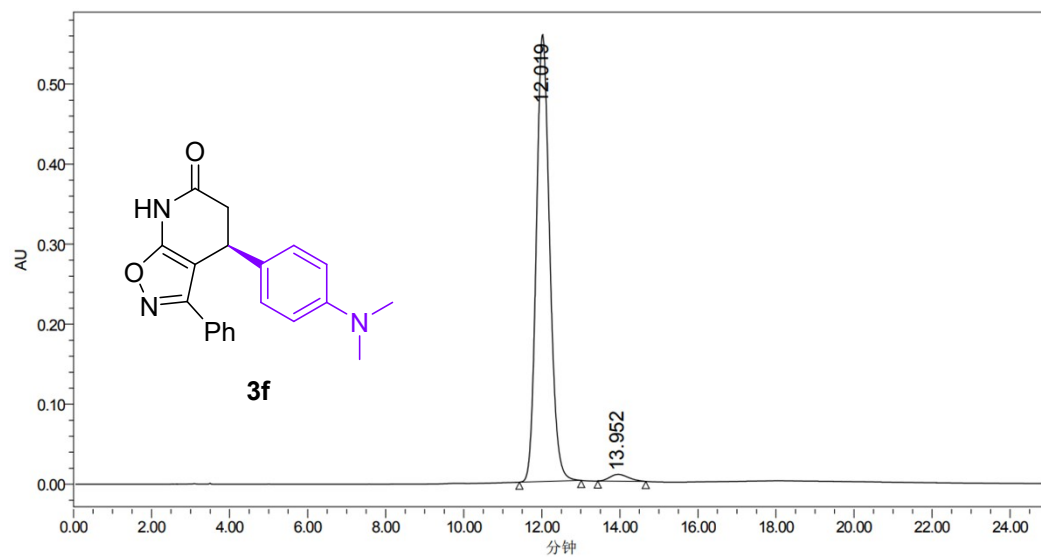

| Peak  | Ret.Time | Area     | Height | Area%  | Height% |
|-------|----------|----------|--------|--------|---------|
| 1     | 12.019   | 13278580 | 558258 | 97.91  | 98.50   |
| 2     | 13.952   | 283379   | 8525   | 2.09   | 1.50    |
| Total |          | 13561959 | 566783 | 100.00 | 100.00  |

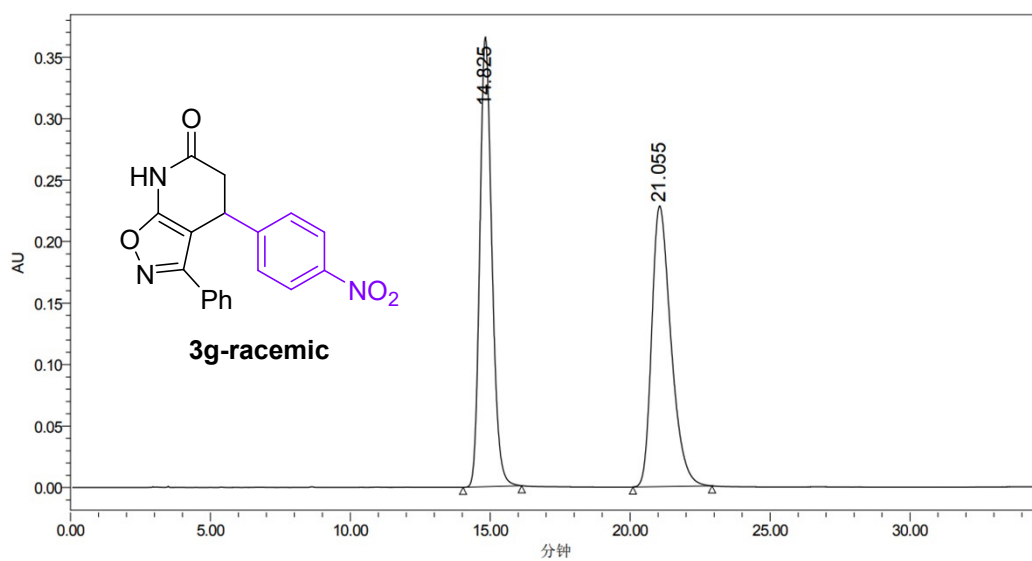

| Peak  | Ret.Time | Area     | Height | Area%  | Height% |
|-------|----------|----------|--------|--------|---------|
| 1     | 14.825   | 10953482 | 365531 | 50.05  | 61.56   |
| 2     | 21.055   | 10930748 | 228235 | 49.95  | 38.44   |
| Total |          | 21884230 | 593766 | 100.00 | 100.00  |

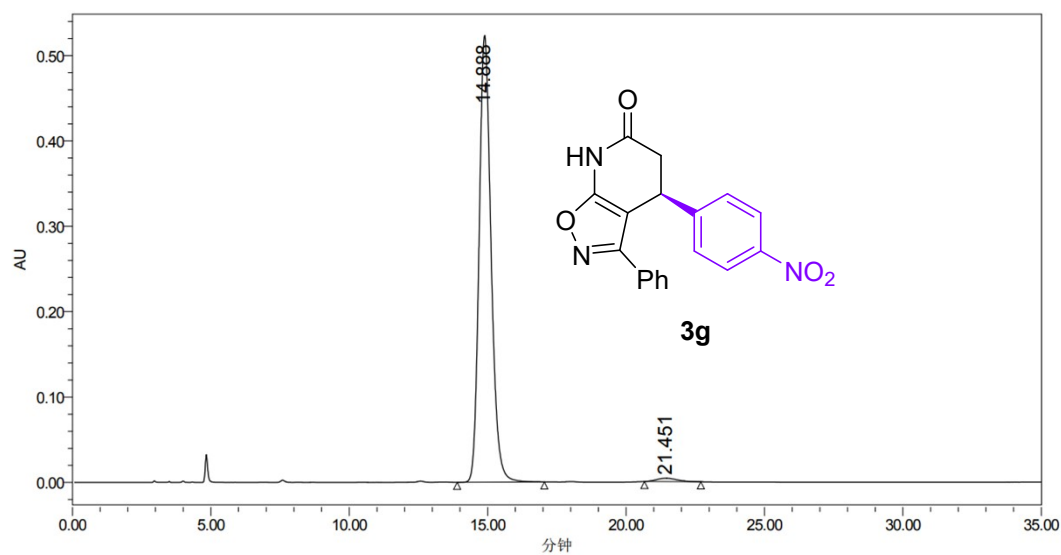

| Peak  | Ret.Time | Area     | Height | Area%  | Height% |
|-------|----------|----------|--------|--------|---------|
| 1     | 14.888   | 15719193 | 522900 | 98.70  | 99.25   |
| 2     | 21.451   | 206611   | 3953   | 1.30   | 0.75    |
| Total |          | 15925804 | 526853 | 100.00 | 100.00  |

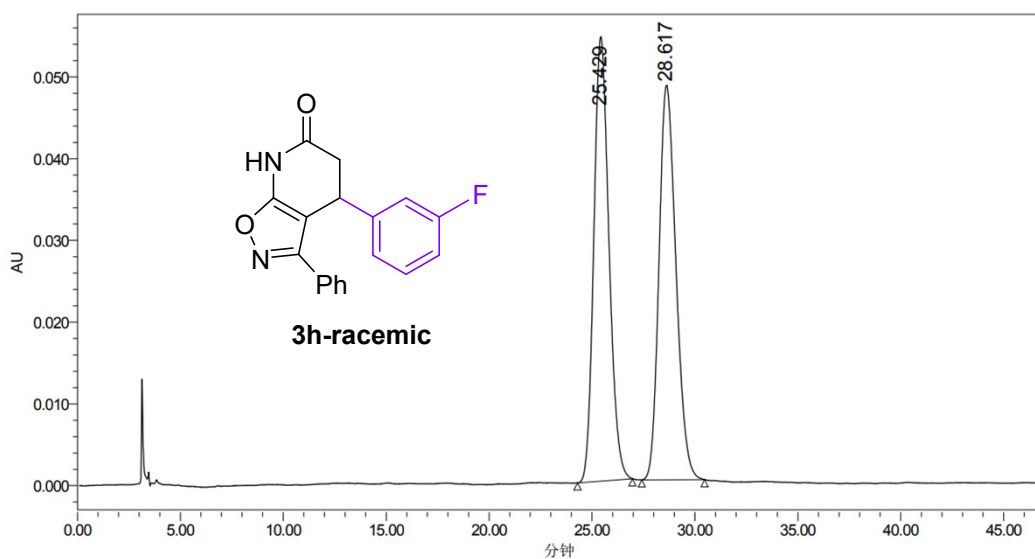

| Peak  | Ret.Time | Area    | Height | Area%  | Height% |
|-------|----------|---------|--------|--------|---------|
| 1     | 25.429   | 2770319 | 54350  | 50.05  | 52.96   |
| 2     | 28.617   | 2765121 | 48268  | 49.95  | 47.04   |
| Total |          | 5535440 | 102618 | 100.00 | 100.00  |

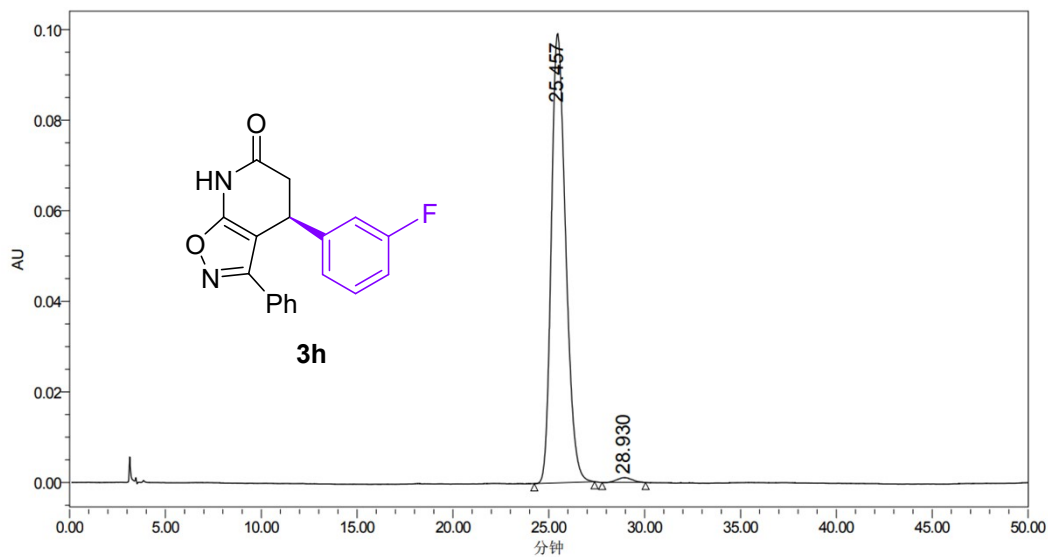

| Peak  | Ret.Time | Area    | Height | Area%  | Height% |
|-------|----------|---------|--------|--------|---------|
| 1     | 25.457   | 5168533 | 99156  | 98.88  | 98.94   |
| 2     | 28.930   | 58756   | 1061   | 1.12   | 1.06    |
| Total |          | 5227289 | 100217 | 100.00 | 100.00  |

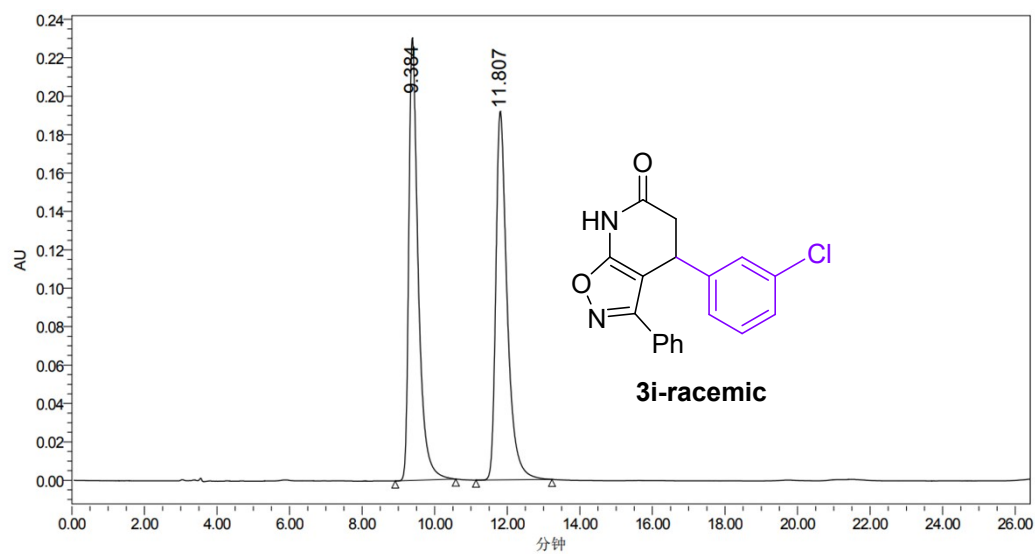

| Peak  | Ret.Time | Area    | Height | Area%  | Height% |
|-------|----------|---------|--------|--------|---------|
| 1     | 9.384    | 4143918 | 230412 | 49.86  | 54.57   |
| 2     | 11.807   | 4167929 | 191794 | 50.14  | 45.43   |
| Total |          | 8311847 | 422206 | 100.00 | 100.00  |

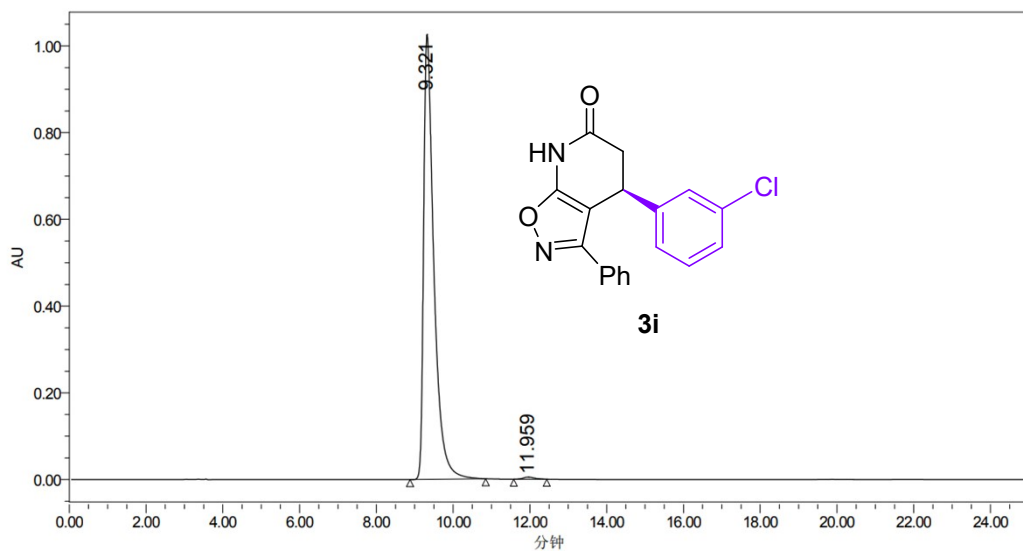

| Peak  | Ret.Time | Area     | Height  | Area%  | Height% |
|-------|----------|----------|---------|--------|---------|
| 1     | 9.321    | 19023313 | 1026097 | 99.47  | 99.53   |
| 2     | 11.959   | 101056   | 4864    | 0.53   | 0.47    |
| Total |          | 19124369 | 1030961 | 100.00 | 100.00  |

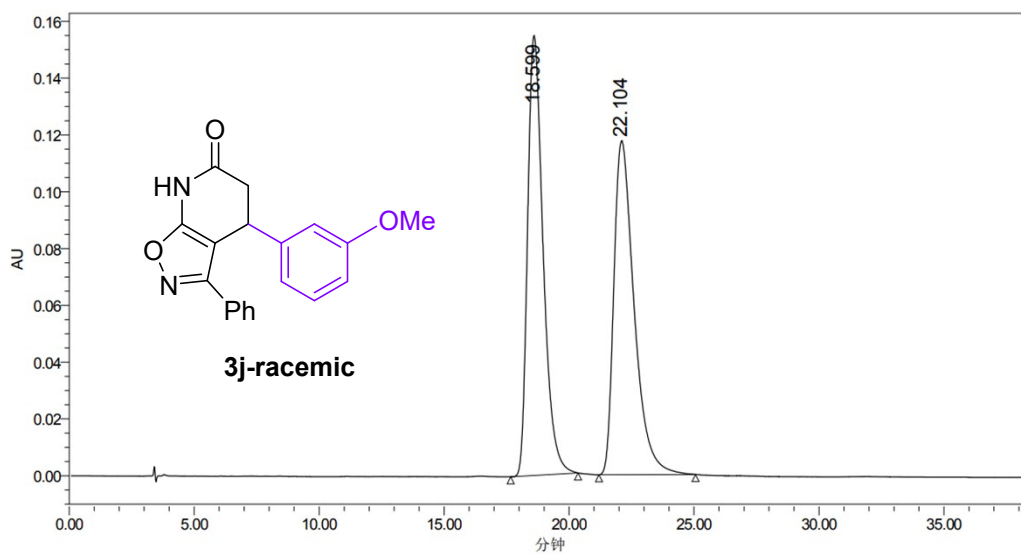

| Peak  | Ret. Time | Area     | Height | Area%  | Height% |
|-------|-----------|----------|--------|--------|---------|
| 1     | 18.599    | 6665658  | 154845 | 50.16  | 56.83   |
| 2     | 22.104    | 6622751  | 117605 | 49.84  | 43.17   |
| Total |           | 13288409 | 272450 | 100.00 | 100.00  |

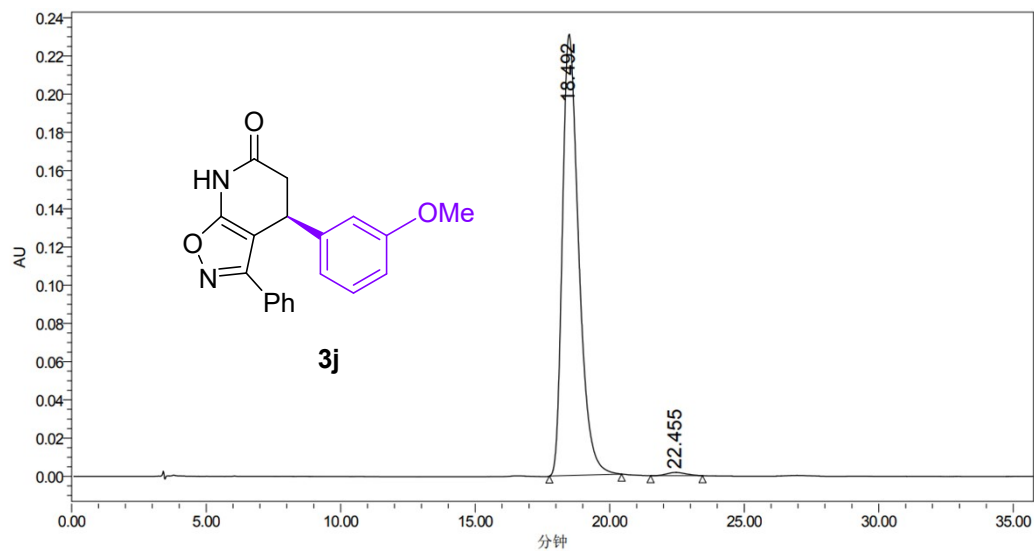

| Peak  | Ret. Time | Area    | Height | Area%  | Height% |
|-------|-----------|---------|--------|--------|---------|
| 1     | 18.492    | 9720964 | 230867 | 99.12  | 99.26   |
| 2     | 22.455    | 86194   | 1732   | 0.88   | 0.74    |
| Total |           | 9807158 | 232599 | 100.00 | 100.00  |

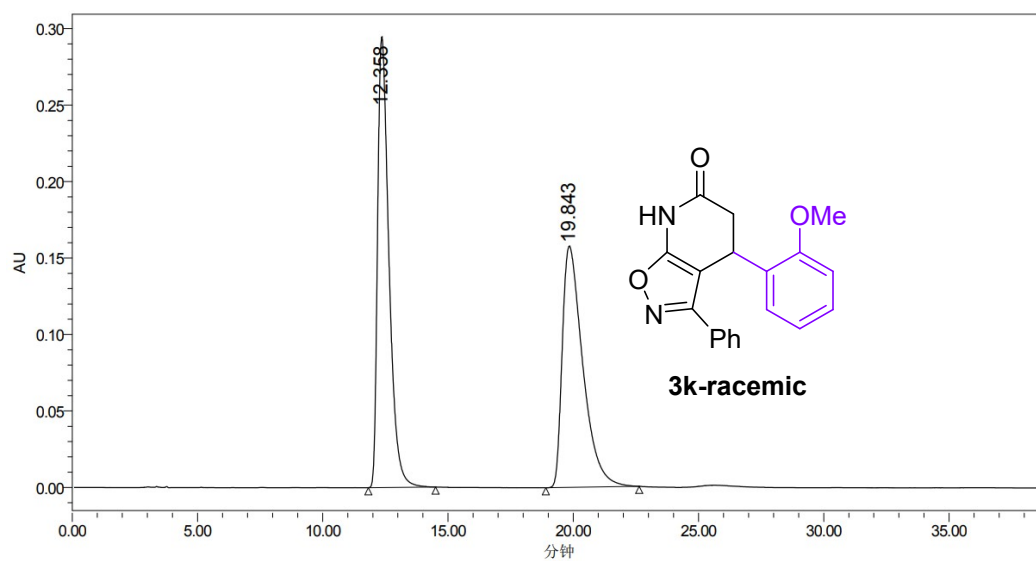

| Peak  | Ret.Time | Area     | Height | Area%  | Height% |
|-------|----------|----------|--------|--------|---------|
| 1     | 12.358   | 9289340  | 294718 | 50.81  | 65.13   |
| 2     | 19.843   | 8991588  | 157772 | 49.19  | 34.87   |
| Total |          | 18280928 | 452490 | 100.00 | 100.00  |

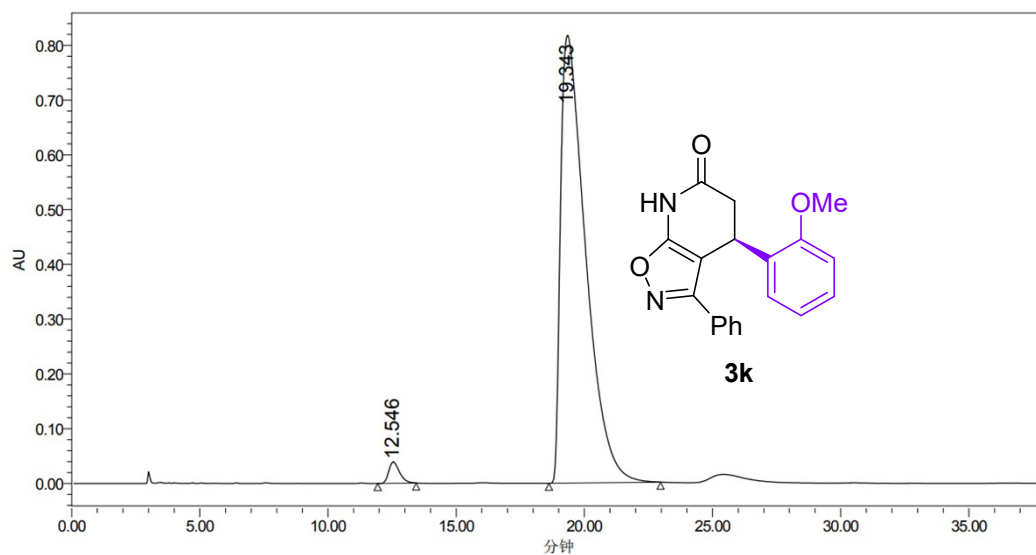

| Peak  | Ret.Time | Area     | Height | Area%  | Height% |
|-------|----------|----------|--------|--------|---------|
| 1     | 12.546   | 1139695  | 38948  | 2.01   | 4.55    |
| 2     | 19.343   | 55490471 | 817237 | 97.99  | 95.45   |
| Total |          | 56630166 | 856185 | 100.00 | 100.00  |

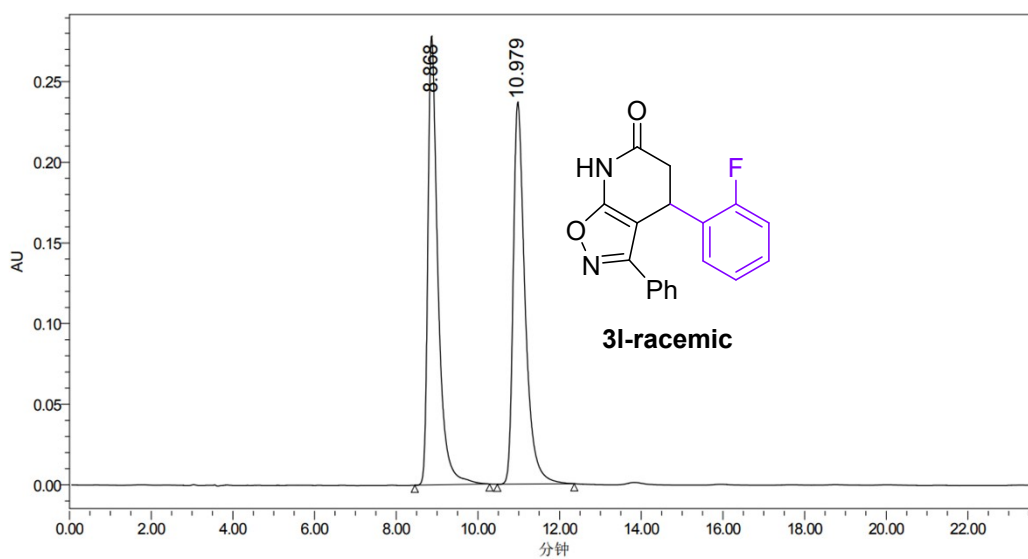

| Peak  | Ret.Time | Area    | Height | Area%  | Height% |
|-------|----------|---------|--------|--------|---------|
| 1     | 8.868    | 4773979 | 278298 | 49.96  | 54.03   |
| 2     | 10.979   | 4782576 | 236753 | 50.04  | 45.97   |
| Total |          | 9556555 | 515051 | 100.00 | 100.00  |

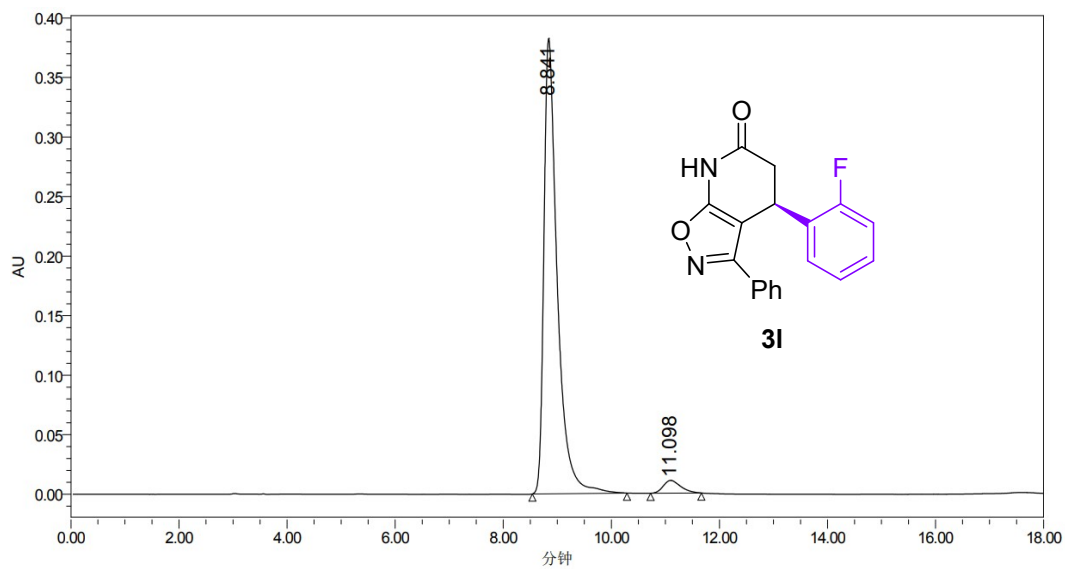

| Peak  | Ret.Time | Area    | Height | Area%  | Height% |
|-------|----------|---------|--------|--------|---------|
| 1     | 8.841    | 6565632 | 382368 | 96.49  | 97.29   |
| 2     | 11.098   | 238955  | 10648  | 3.51   | 2.71    |
| Total |          | 6804587 | 393016 | 100.00 | 100.00  |



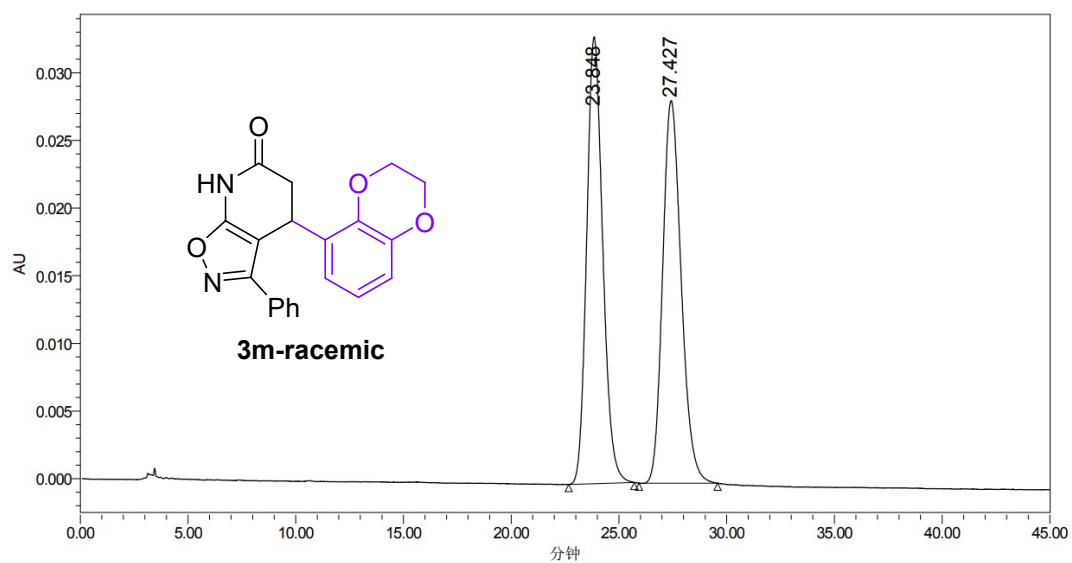

| Peak  | Ret. Time | Area    | Height | Area%  | Height% |
|-------|-----------|---------|--------|--------|---------|
| 1     | 23.848    | 1706838 | 33002  | 50.18  | 53.88   |
| 2     | 27.427    | 1694806 | 28251  | 49.82  | 46.12   |
| Total |           | 3401644 | 61253  | 100.00 | 100.00  |

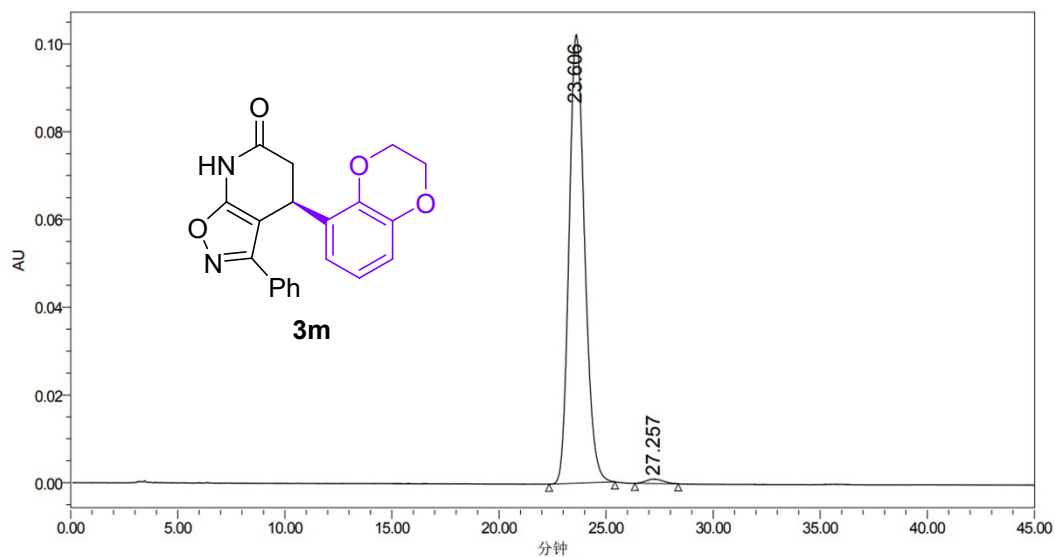

| Peak  | Ret. Time | Area    | Height | Area%  | Height% |
|-------|-----------|---------|--------|--------|---------|
| 1     | 23.606    | 5158448 | 102222 | 98.95  | 99.03   |
| 2     | 27.257    | 54805   | 996    | 1.05   | 0.97    |
| Total |           | 5213253 | 103218 | 100.00 | 100.00  |

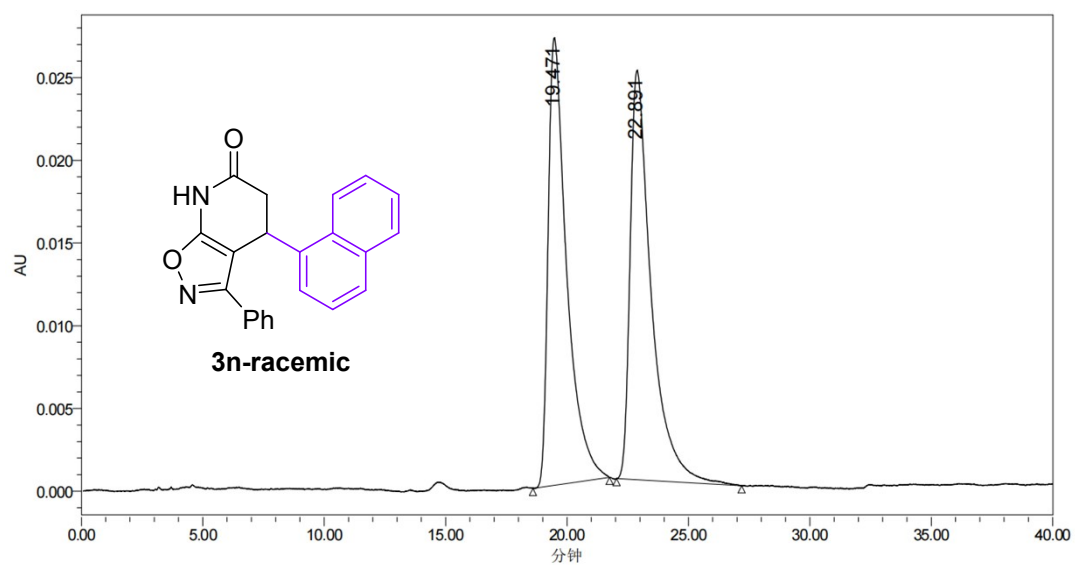

| Peak  | Ret.Time | Area    | Height | Area%  | Height% |
|-------|----------|---------|--------|--------|---------|
| 1     | 19.471   | 1439043 | 27056  | 49.13  | 52.22   |
| 2     | 22.891   | 1489865 | 24753  | 50.87  | 47.78   |
| Total |          | 2928908 | 51809  | 100.00 | 100.00  |

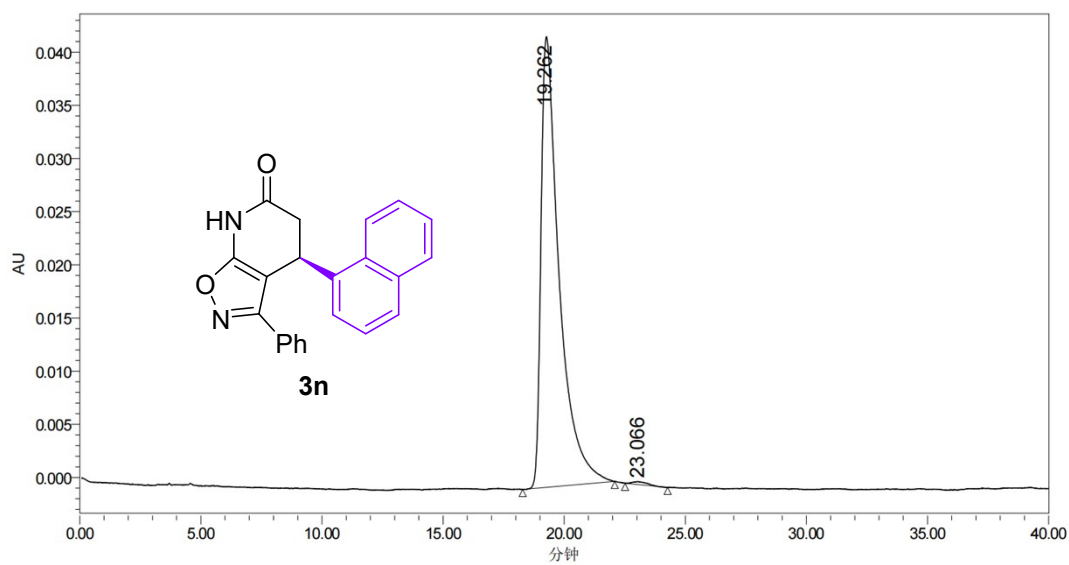

| Peak  | Ret.Time | Area    | Height | Area%  | Height% |
|-------|----------|---------|--------|--------|---------|
| 1     | 19.262   | 2214857 | 42383  | 99.45  | 99.33   |
| 2     | 23.066   | 12235   | 284    | 0.55   | 0.67    |
| Total |          | 2227092 | 42667  | 100.00 | 100.00  |

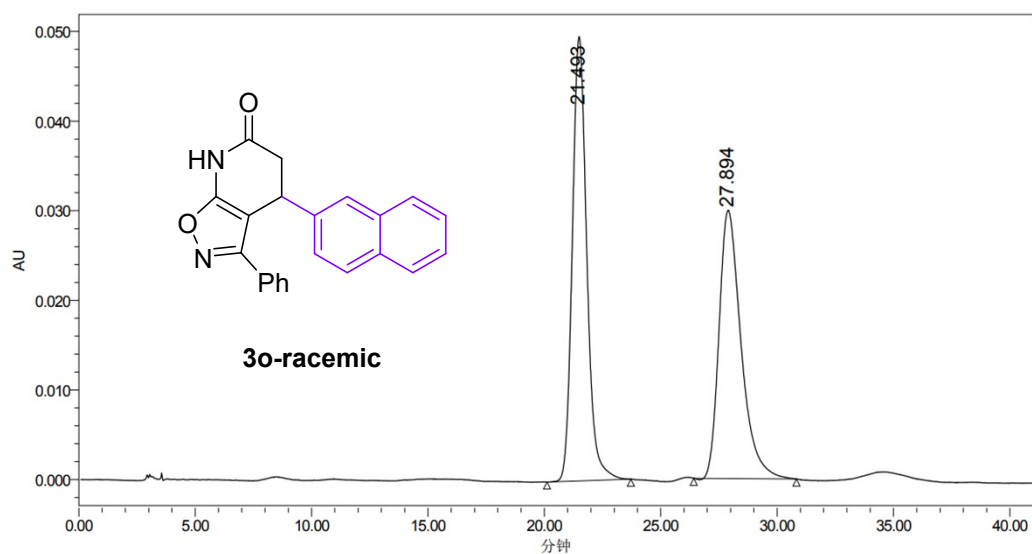

| Peak  | Ret.Time | Area    | Height | Area%  | Height% |
|-------|----------|---------|--------|--------|---------|
| 1     | 21.493   | 2133441 | 49560  | 51.98  | 62.34   |
| 2     | 27.894   | 1971121 | 29938  | 48.02  | 37.66   |
| Total |          | 4104562 | 79498  | 100.00 | 100.00  |

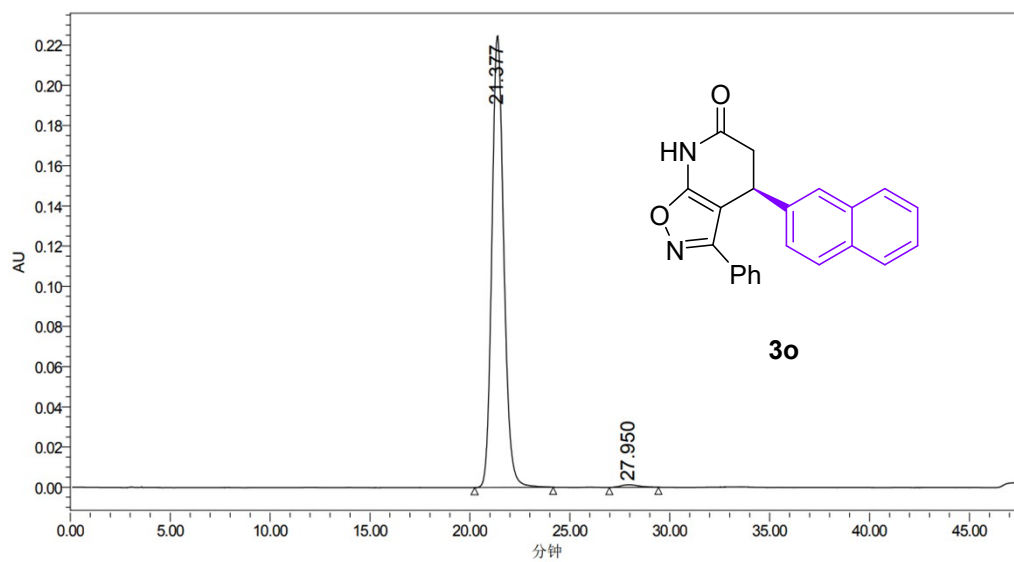

| Peak  | Ret.Time | Area    | Height | Area%  | Height% |
|-------|----------|---------|--------|--------|---------|
| 1     | 21.377   | 9307201 | 224778 | 99.15  | 99.43   |
| 2     | 27.950   | 79864   | 1285   | 0.85   | 0.57    |
| Total |          | 9387065 | 226063 | 100.00 | 100.00  |

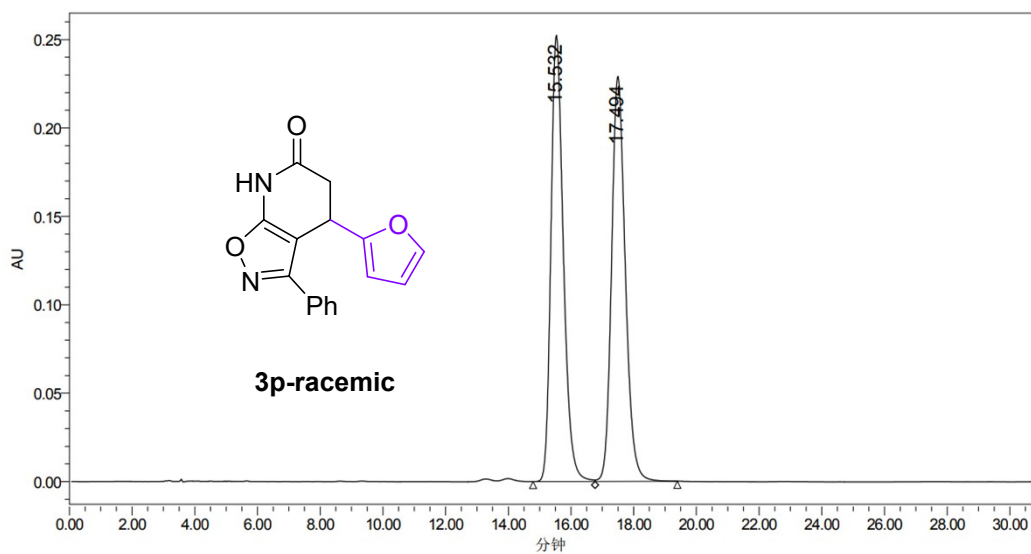

| Peak  | Ret.Time | Area     | Height | Area%  | Height% |
|-------|----------|----------|--------|--------|---------|
| 1     | 15.532   | 6941175  | 252270 | 49.90  | 52.42   |
| 2     | 17.494   | 6969218  | 228956 | 50.10  | 47.58   |
| Total |          | 13910393 | 481226 | 100.00 | 100.00  |

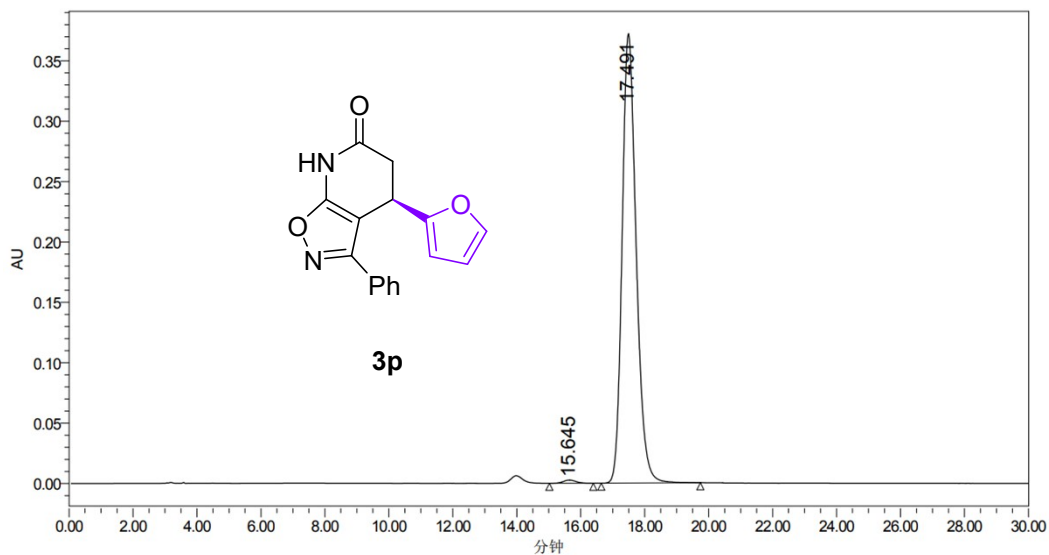

| Peak  | Ret.Time | Area     | Height | Area%  | Height% |
|-------|----------|----------|--------|--------|---------|
| 1     | 15.645   | 71876    | 2613   | 0.63   | 0.70    |
| 2     | 17.491   | 11352993 | 371954 | 99.37  | 99.30   |
| Total |          | 11424869 | 374567 | 100.00 | 100.00  |

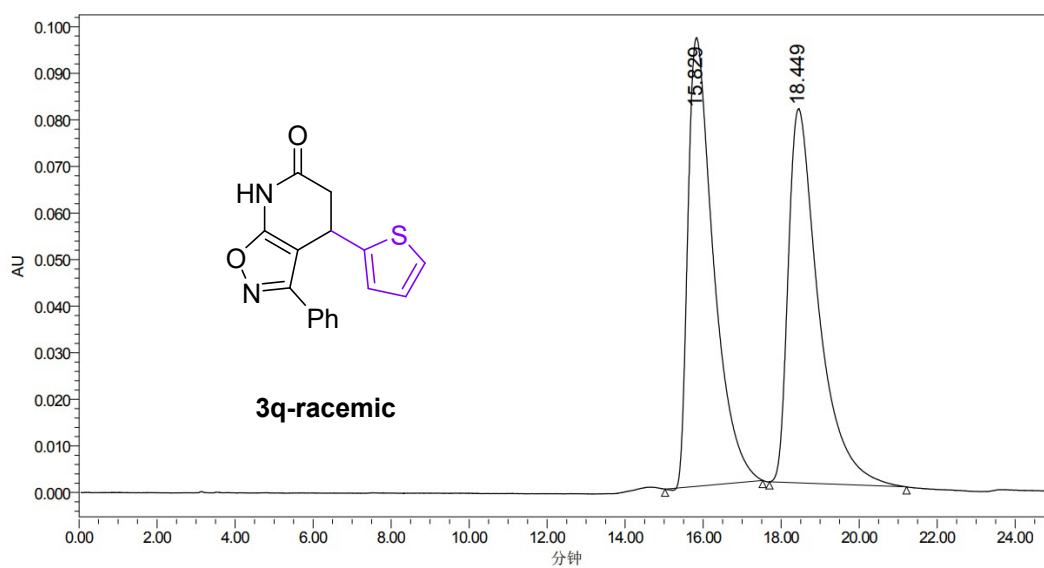

| Peak  | Ret.Time | Area    | Height | Area%  | Height% |
|-------|----------|---------|--------|--------|---------|
| 1     | 15.829   | 4400497 | 96335  | 50.33  | 54.53   |
| 2     | 18.449   | 4342809 | 80331  | 49.67  | 45.47   |
| Total |          | 8743306 | 176666 | 100.00 | 100.00  |

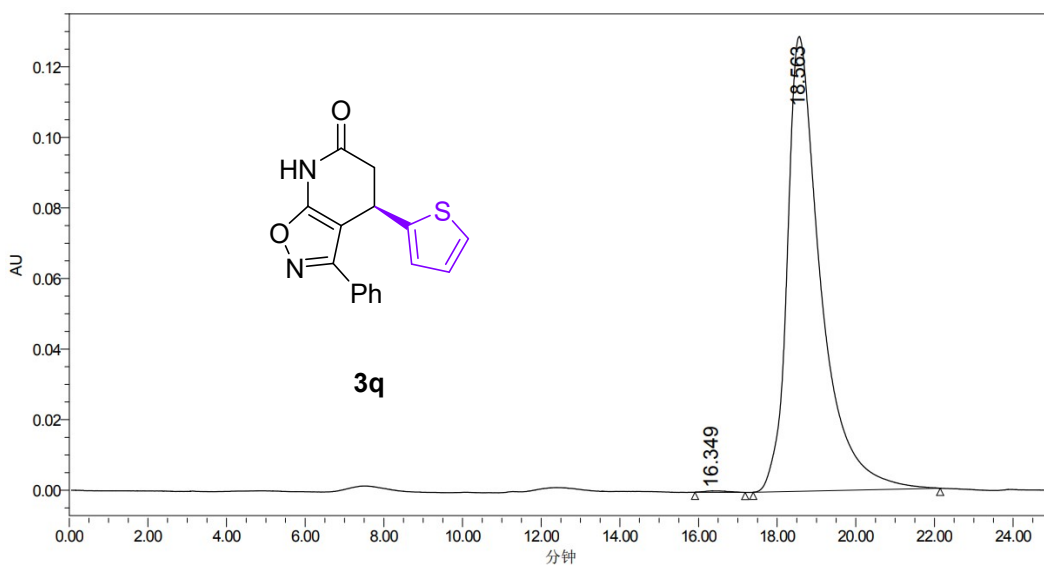

| Peak  | Ret.Time | Area    | Height | Area%  | Height% |
|-------|----------|---------|--------|--------|---------|
| 1     | 16.349   | 16155   | 417    | 0.21   | 0.32    |
| 2     | 18.563   | 7604142 | 128815 | 99.79  | 99.68   |
| Total |          | 7620297 | 129232 | 100.00 | 100.00  |

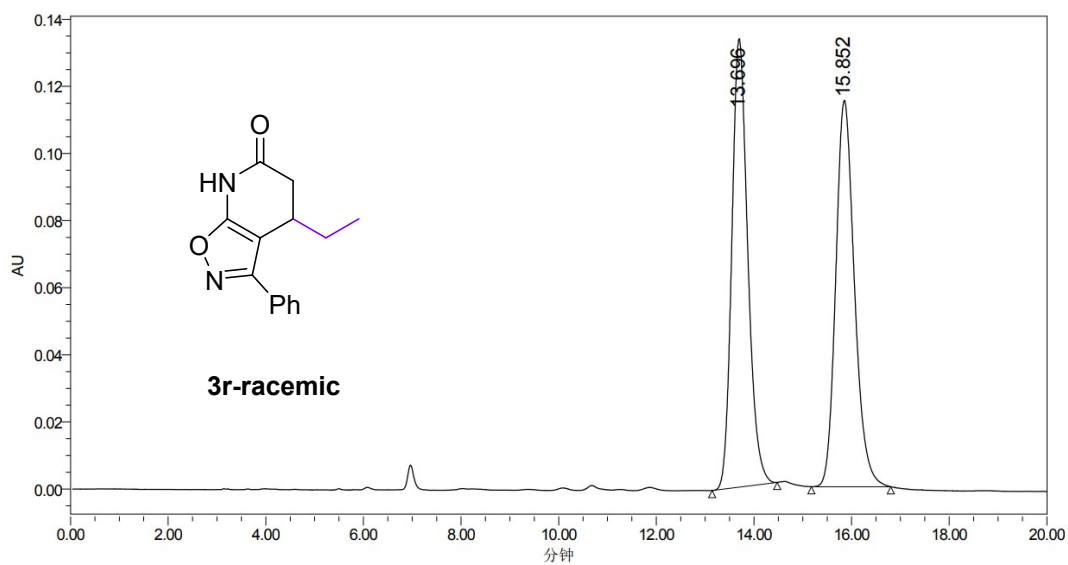

| Peak  | Ret.Time | Area    | Height | Area%  | Height% |
|-------|----------|---------|--------|--------|---------|
| 1     | 13.696   | 3028455 | 133597 | 49.74  | 53.72   |
| 2     | 15.852   | 3059967 | 115107 | 50.26  | 46.28   |
| Total |          | 6088422 | 248704 | 100.00 | 100.00  |

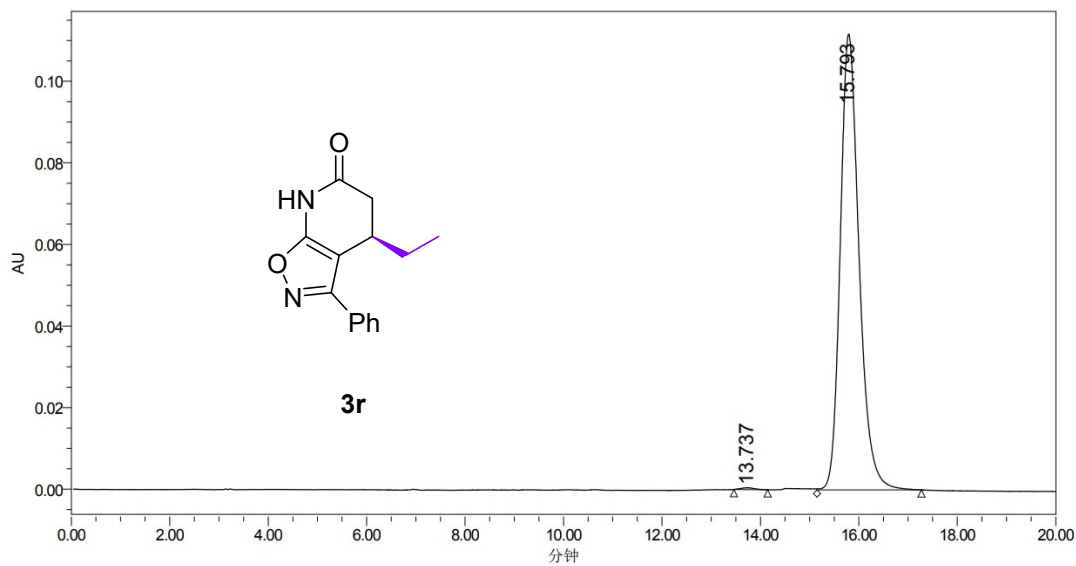

| Peak  | Ret.Time | Area    | Height | Area%  | Height% |
|-------|----------|---------|--------|--------|---------|
| 1     | 13.737   | 8985    | 474    | 0.30   | 0.42    |
| 2     | 15.793   | 2958826 | 111702 | 99.70  | 99.58   |
| Total |          | 2967811 | 112176 | 100.00 | 100.00  |

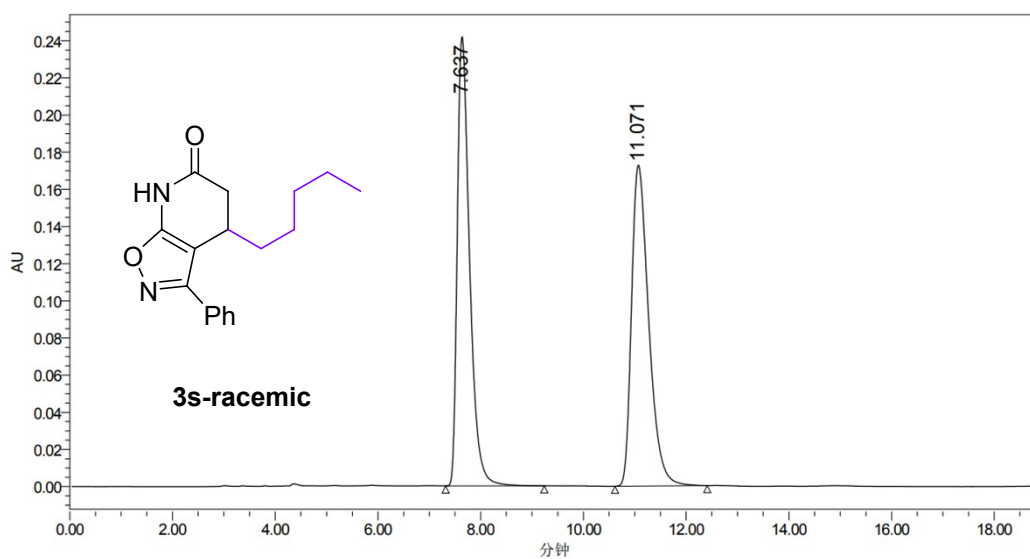

| Peak  | Ret.Time | Area    | Height | Area%  | Height% |
|-------|----------|---------|--------|--------|---------|
| 1     | 7.637    | 4022946 | 241577 | 50.08  | 58.32   |
| 2     | 11.071   | 4009653 | 172665 | 49.92  | 41.68   |
| Total |          | 8032599 | 414242 | 100.00 | 100.00  |

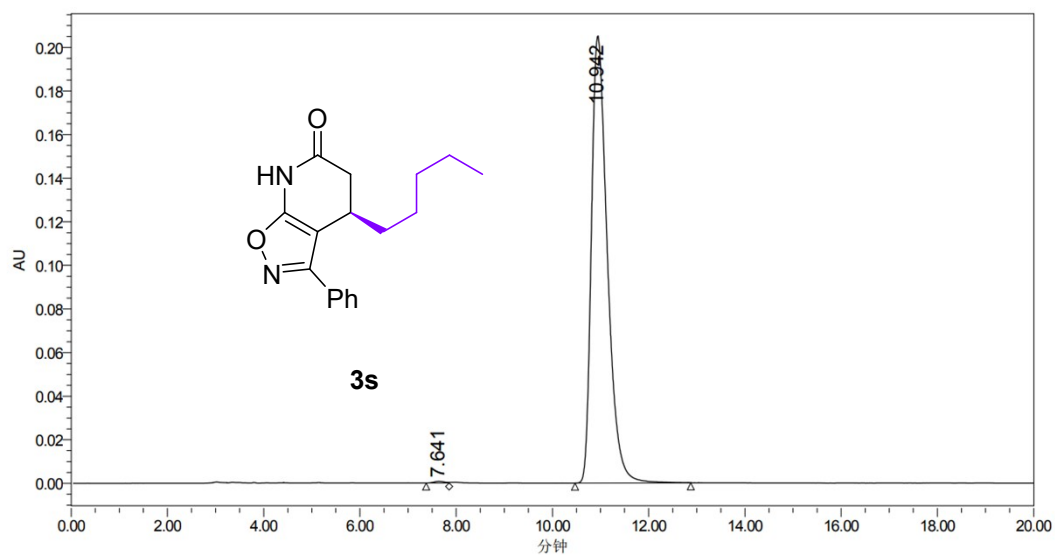

| Peak  | Ret.Time | Area    | Height | Area%  | Height% |
|-------|----------|---------|--------|--------|---------|
| 1     | 7.641    | 11652   | 772    | 0.25   | 0.38    |
| 2     | 10.942   | 4706881 | 204970 | 99.75  | 99.62   |
| Total |          | 4718533 | 205742 | 100.00 | 100.00  |

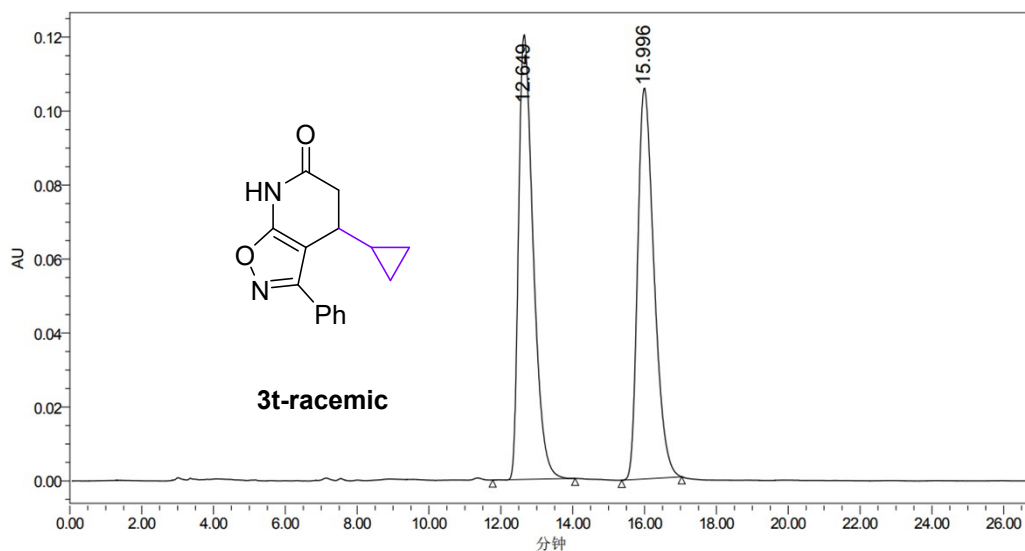

| Peak  | Ret.Time | Area    | Height | Area%  | Height% |
|-------|----------|---------|--------|--------|---------|
| 1     | 12.649   | 3388860 | 120162 | 50.22  | 53.21   |
| 2     | 15.996   | 3359115 | 105645 | 49.78  | 46.79   |
| Total |          | 6747975 | 225807 | 100.00 | 100.00  |

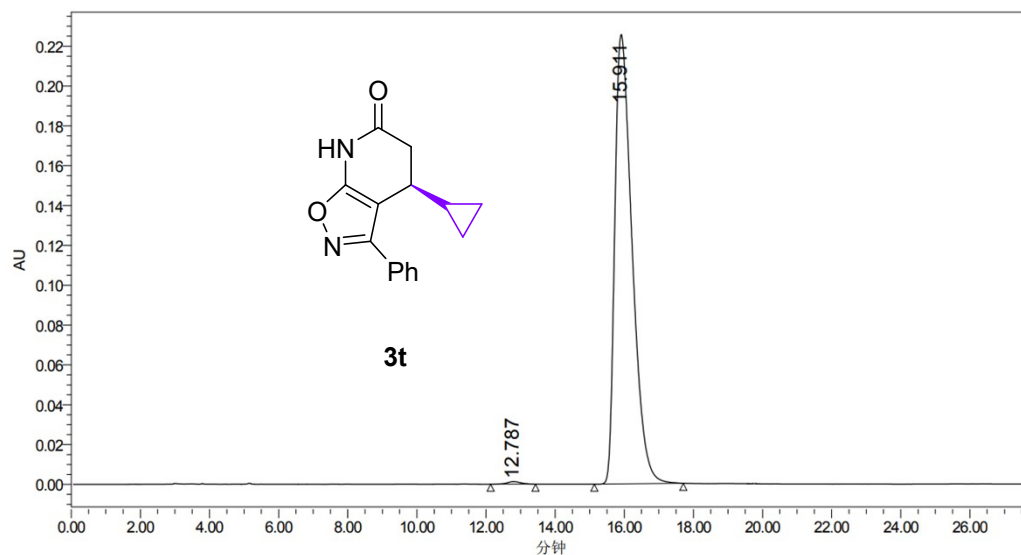

| Peak  | Ret.Time | Area    | Height | Area%  | Height% |
|-------|----------|---------|--------|--------|---------|
| 1     | 12.787   | 34793   | 1271   | 0.44   | 0.56    |
| 2     | 15.911   | 7851590 | 225496 | 99.56  | 99.44   |
| Total |          | 7886383 | 226767 | 100.00 | 100.00  |



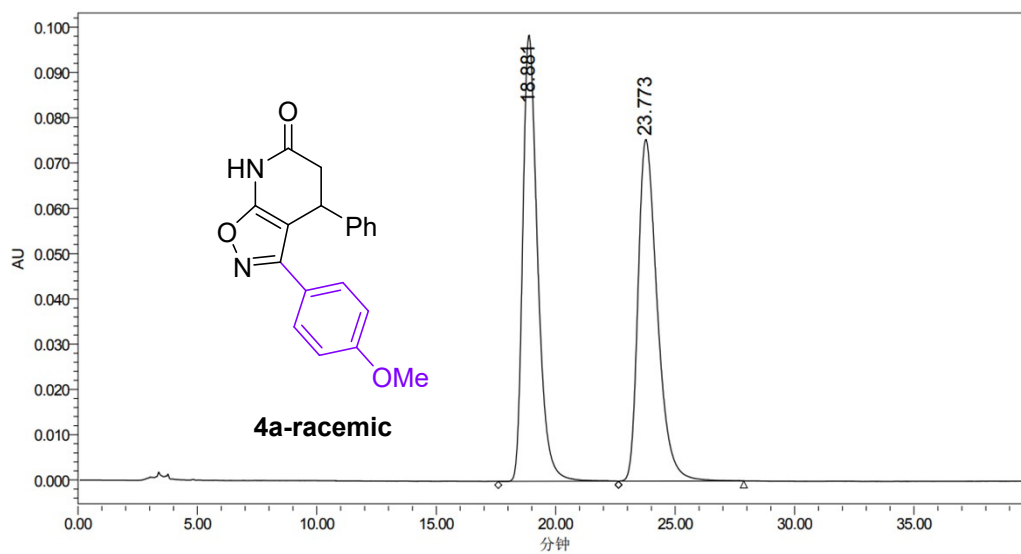

| Peak  | Ret.Time | Area    | Height | Area%  | Height% |
|-------|----------|---------|--------|--------|---------|
| 1     | 18.881   | 4253496 | 98491  | 50.19  | 56.63   |
| 2     | 23.773   | 4221362 | 75423  | 49.81  | 43.37   |
| Total |          | 8474858 | 173914 | 100.00 | 100.00  |

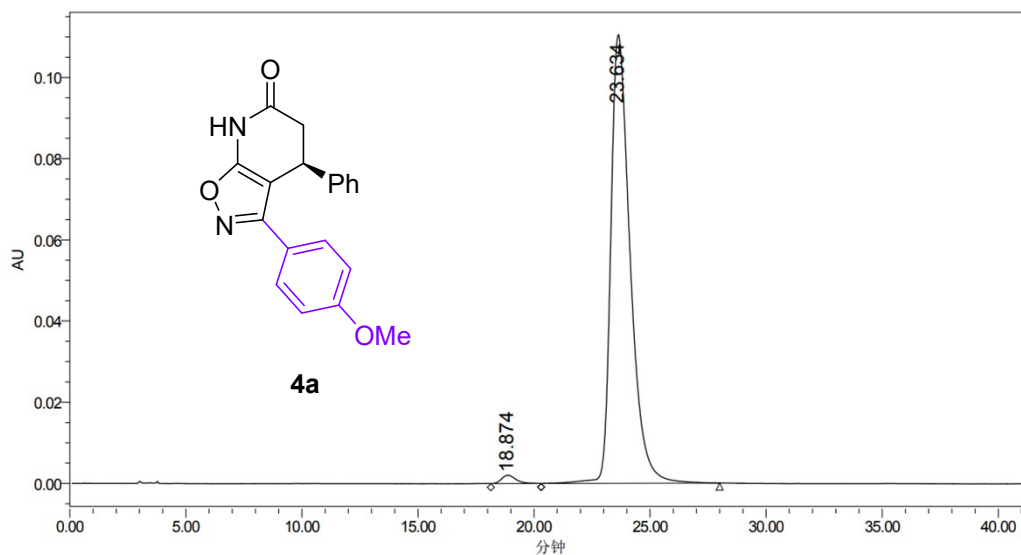

| Peak  | Ret.Time | Area    | Height | Area%  | Height% |
|-------|----------|---------|--------|--------|---------|
| 1     | 18.874   | 91022   | 2081   | 1.40   | 1.85    |
| 2     | 23.634   | 6418336 | 110515 | 98.60  | 98.15   |
| Total |          | 6509358 | 112596 | 100.00 | 100.00  |

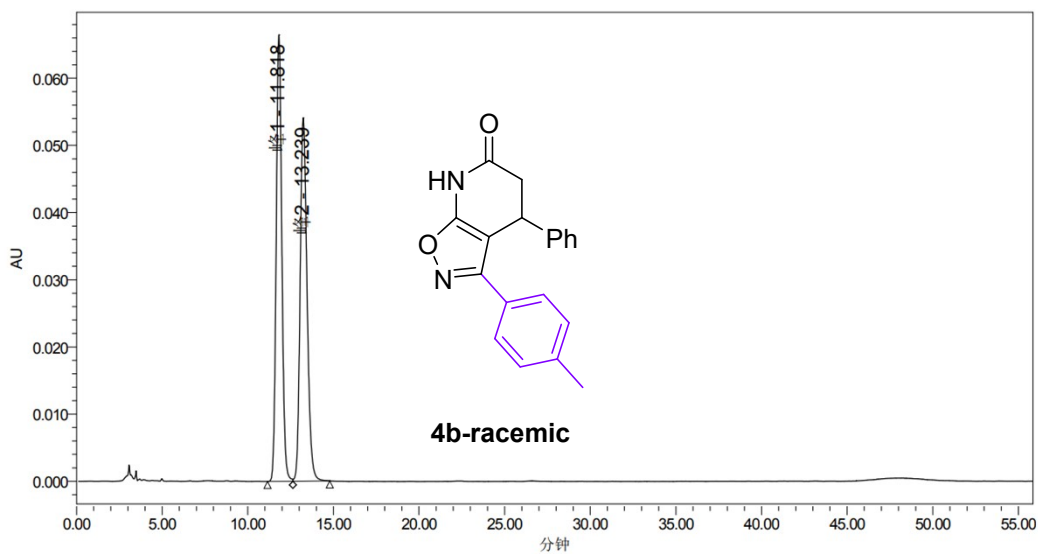

| Peak  | Ret.Time | Area    | Height | Area%  | Height% |
|-------|----------|---------|--------|--------|---------|
| 1     | 11.818   | 1512799 | 66496  | 49.95  | 55.15   |
| 2     | 13.239   | 1515686 | 54084  | 50.05  | 44.85   |
| Total |          | 3028485 | 120580 | 100.00 | 100.00  |

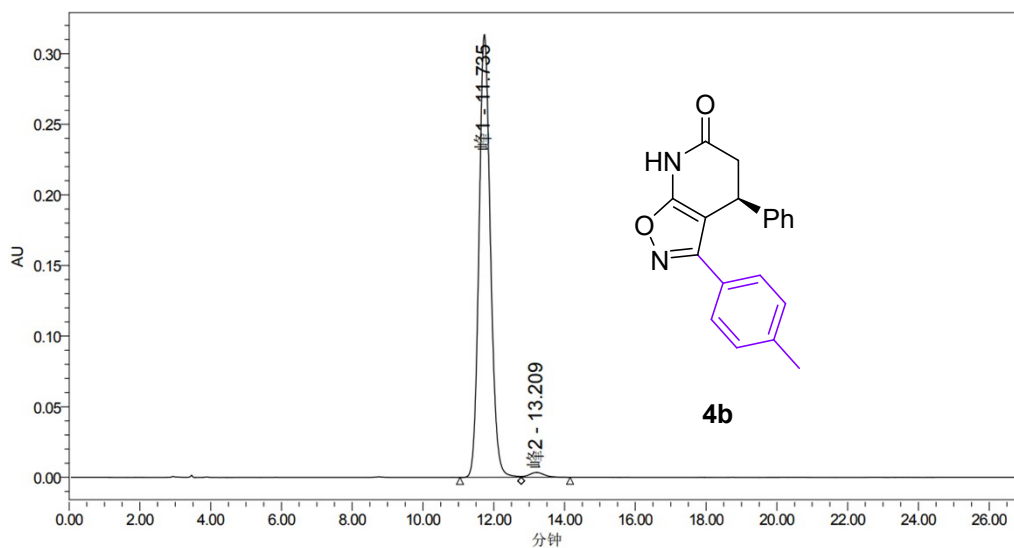

| Peak  | Ret.Time | Area    | Height | Area%  | Height% |
|-------|----------|---------|--------|--------|---------|
| 1     | 11.735   | 7014202 | 313389 | 98.55  | 98.91   |
| 2     | 13.209   | 102878  | 3442   | 1.45   | 1.09    |
| Total |          | 7117080 | 316831 | 100.00 | 100.00  |

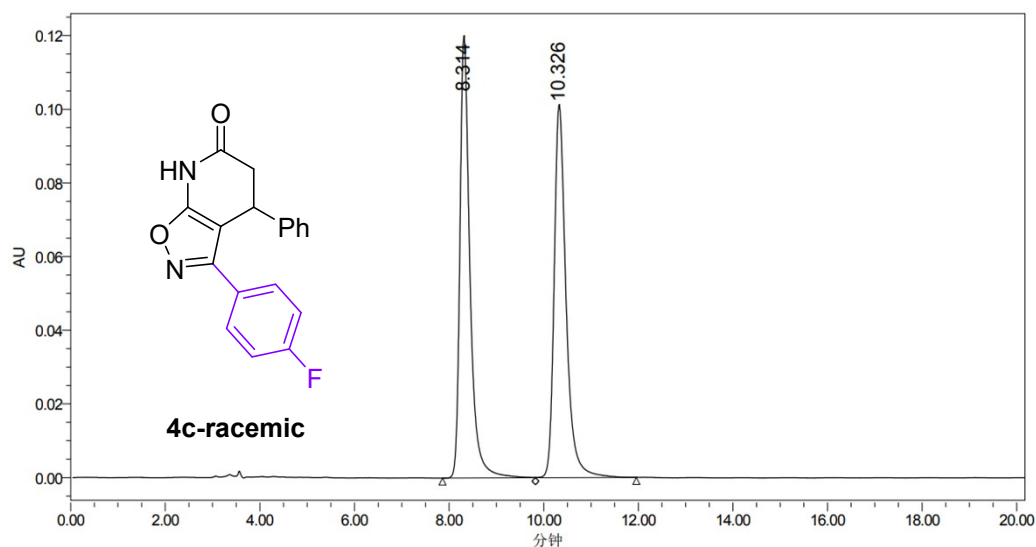

| Peak  | Ret.Time | Area    | Height | Area%  | Height% |
|-------|----------|---------|--------|--------|---------|
| 1     | 8.314    | 1769943 | 120075 | 49.99  | 54.24   |
| 2     | 10.326   | 1770462 | 101301 | 50.01  | 45.76   |
| Total |          | 3540405 | 221376 | 100.00 | 100.00  |

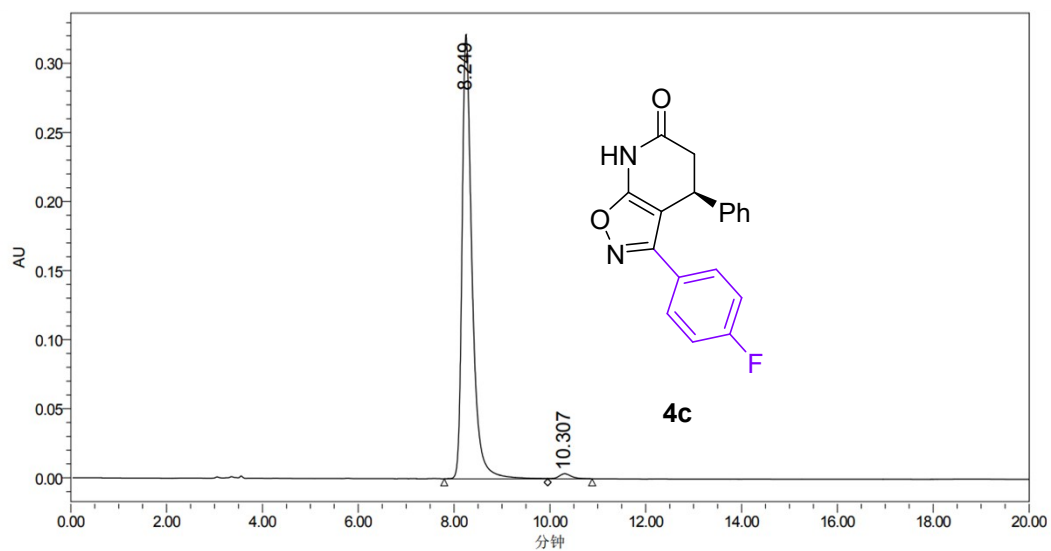

| Peak  | Ret.Time | Area    | Height | Area%  | Height% |
|-------|----------|---------|--------|--------|---------|
| 1     | 8.249    | 4657025 | 321611 | 98.61  | 98.88   |
| 2     | 10.307   | 65429   | 3655   | 1.39   | 1.12    |
| Total |          | 4722454 | 325266 | 100.00 | 100.00  |

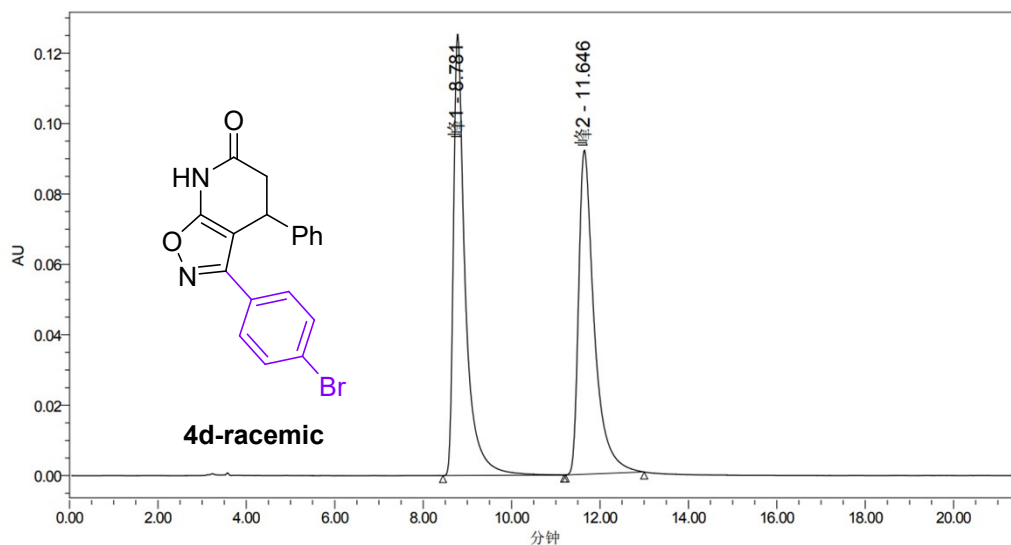

| Peak  | Ret.Time | Area    | Height | Area%  | Height% |
|-------|----------|---------|--------|--------|---------|
| 1     | 8.781    | 2333666 | 125274 | 50.80  | 57.66   |
| 2     | 11.646   | 2260351 | 91999  | 49.20  | 42.34   |
| Total |          | 4594017 | 217273 | 100.00 | 100.00  |

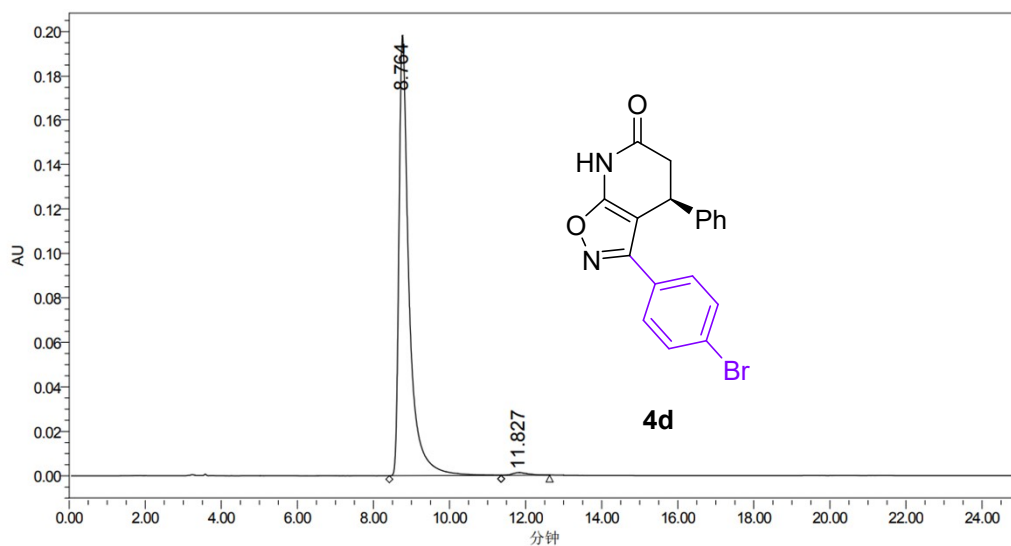

| Peak  | Ret.Time | Area    | Height | Area%  | Height% |
|-------|----------|---------|--------|--------|---------|
| 1     | 8.764    | 3666798 | 198325 | 99.11  | 99.41   |
| 2     | 11.827   | 32979   | 1167   | 0.89   | 0.59    |
| Total |          | 3699777 | 199492 | 100.00 | 100.00  |

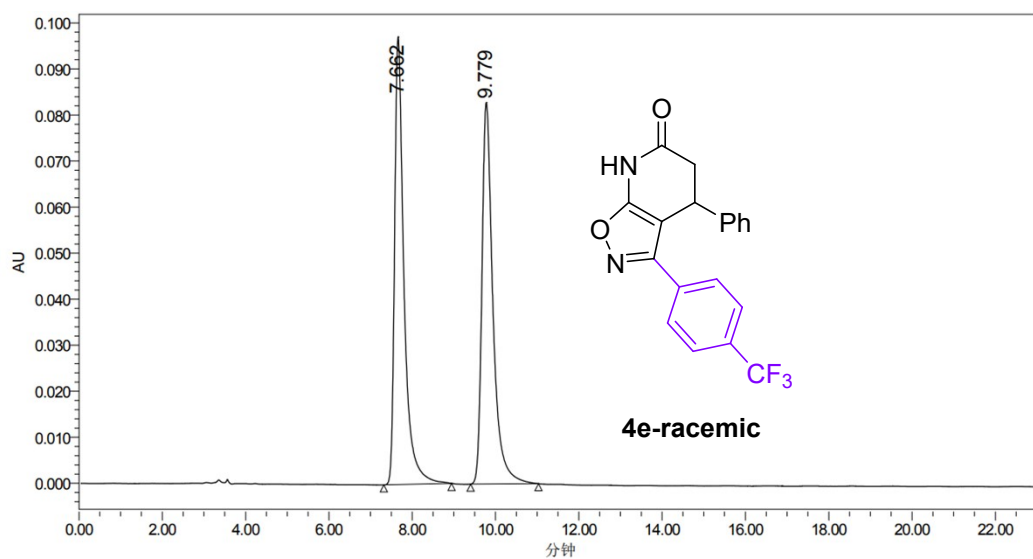

| Peak  | Ret.Time | Area    | Height | Area%  | Height% |
|-------|----------|---------|--------|--------|---------|
| 1     | 7.662    | 1526820 | 97257  | 50.07  | 53.98   |
| 2     | 9.779    | 1522379 | 82921  | 49.93  | 46.02   |
| Total |          | 3049199 | 180178 | 100.00 | 100.00  |

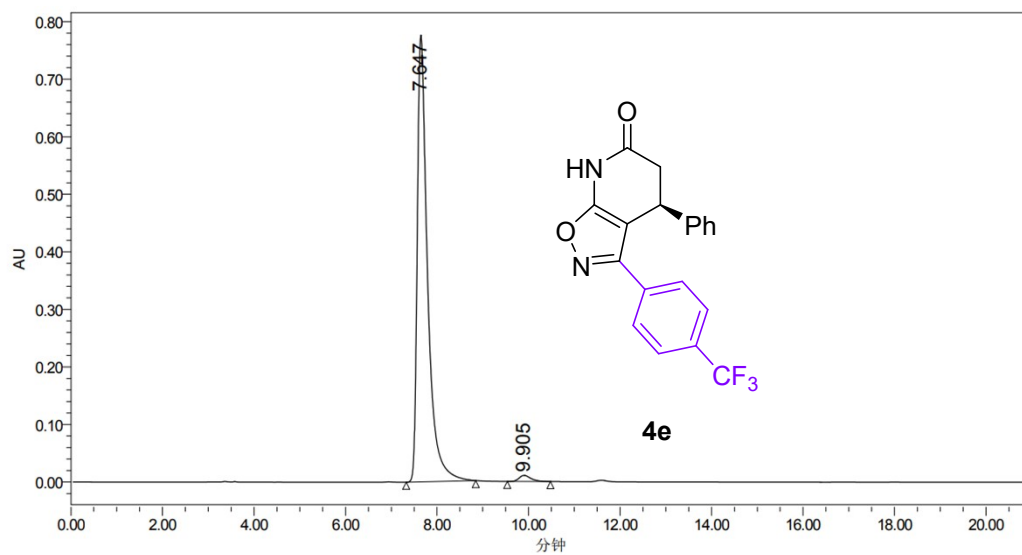

| Peak  | Ret.Time | Area     | Height | Area%  | Height% |
|-------|----------|----------|--------|--------|---------|
| 1     | 7.647    | 12101385 | 776260 | 98.44  | 98.64   |
| 2     | 9.905    | 191690   | 10684  | 1.56   | 1.36    |
| Total |          | 12293075 | 786944 | 100.00 | 100.00  |

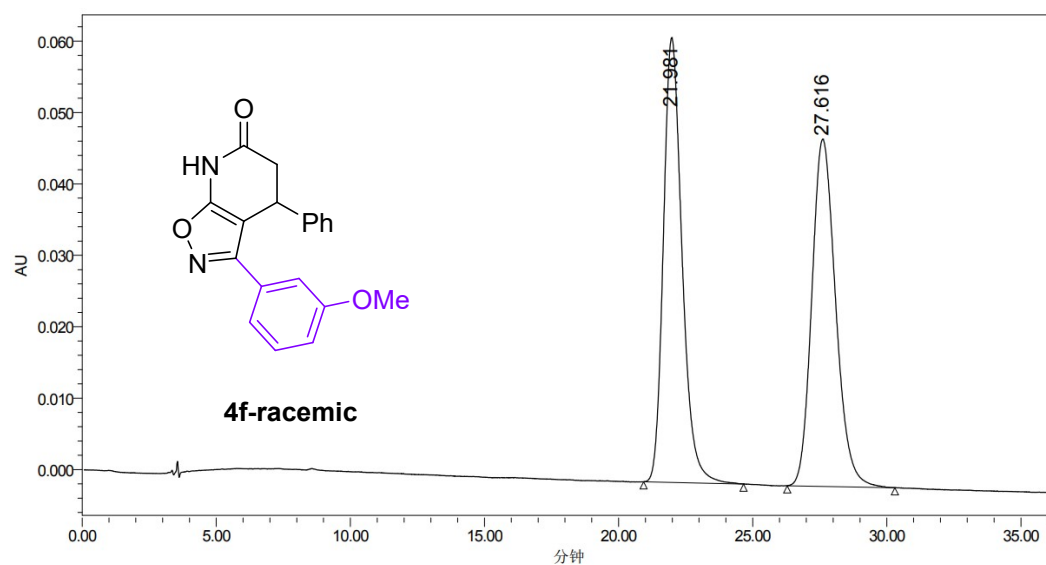

| Peak  | Ret.Time | Area    | Height | Area%  | Height% |
|-------|----------|---------|--------|--------|---------|
| 1     | 21.981   | 3004020 | 62262  | 50.00  | 56.15   |
| 2     | 27.616   | 3004376 | 48616  | 50.00  | 43.85   |
| Total |          | 6008396 | 110878 | 100.00 | 100.00  |

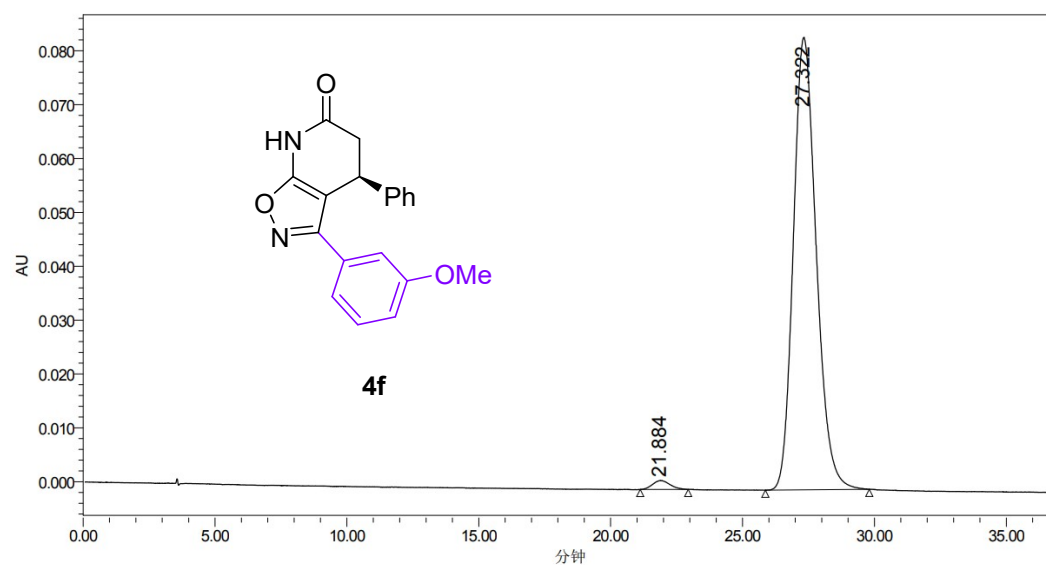

| Peak  | Ret.Time | Area    | Height | Area%  | Height% |
|-------|----------|---------|--------|--------|---------|
| 1     | 21.884   | 76505   | 1655   | 1.49   | 1.93    |
| 2     | 27.322   | 5057551 | 83972  | 98.51  | 98.07   |
| Total |          | 5134056 | 85627  | 100.00 | 100.00  |

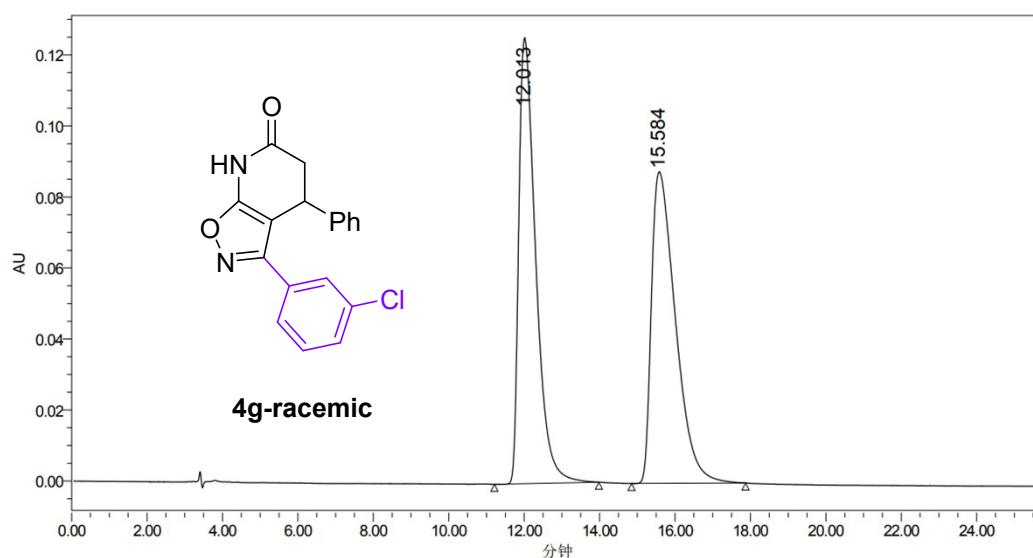

| Peak  | Ret.Time | Area    | Height | Area%  | Height% |
|-------|----------|---------|--------|--------|---------|
| 1     | 12.013   | 3906507 | 125520 | 50.15  | 58.86   |
| 2     | 15.584   | 3882849 | 87749  | 49.85  | 41.14   |
| Total |          | 7789356 | 213269 | 100.00 | 100.00  |

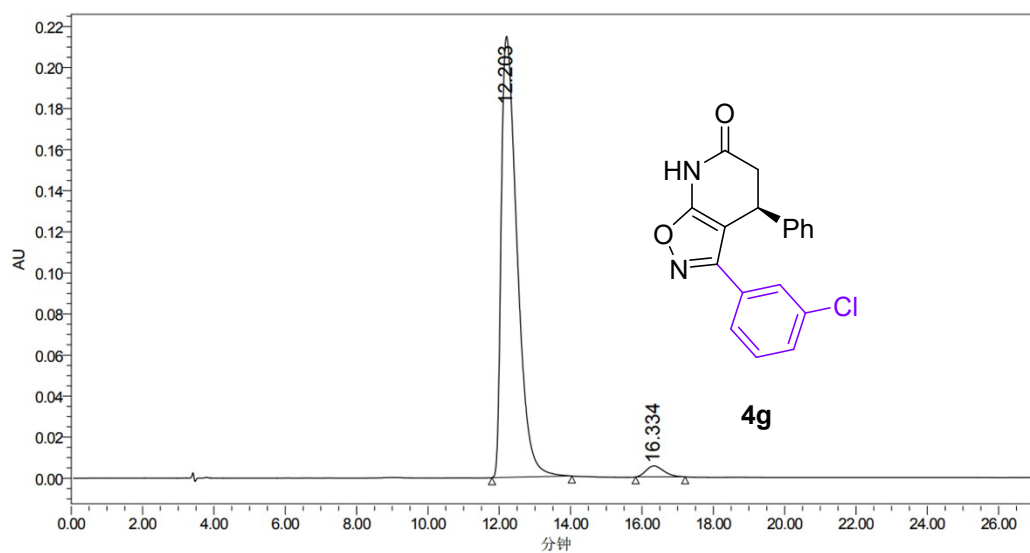

| Peak  | Ret.Time | Area    | Height | Area%  | Height% |
|-------|----------|---------|--------|--------|---------|
| 1     | 12.203   | 6599585 | 214685 | 97.27  | 97.56   |
| 2     | 16.334   | 185037  | 5360   | 2.73   | 2.44    |
| Total |          | 6784622 | 220045 | 100.00 | 100.00  |

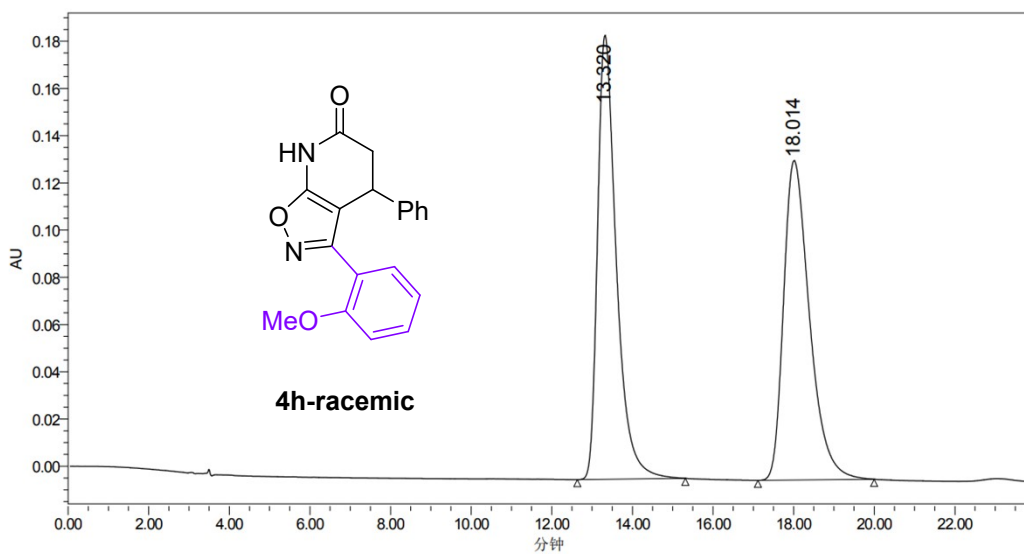

| Peak  | Ret.Time | Area     | Height | Area%  | Height% |
|-------|----------|----------|--------|--------|---------|
| 1     | 13.320   | 6090070  | 188009 | 50.17  | 58.15   |
| 2     | 18.014   | 6047635  | 135289 | 49.83  | 41.85   |
| Total |          | 12137705 | 323298 | 100.00 | 100.00  |

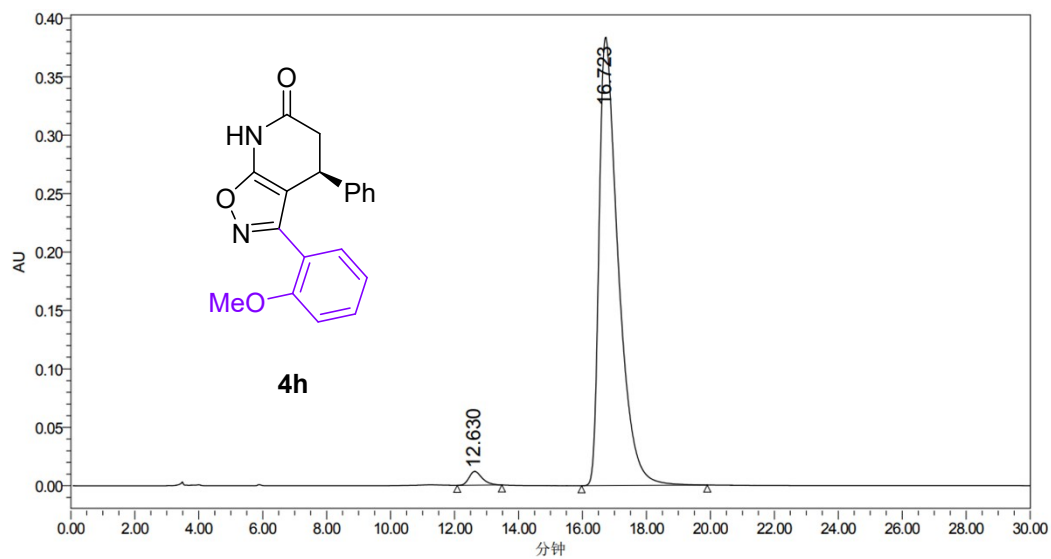

| Peak  | Ret.Time | Area     | Height | Area%  | Height% |
|-------|----------|----------|--------|--------|---------|
| 1     | 12.630   | 338317   | 11776  | 2.08   | 2.98    |
| 2     | 16.723   | 15942477 | 383473 | 97.92  | 97.02   |
| Total |          | 16280794 | 395249 | 100.00 | 100.00  |



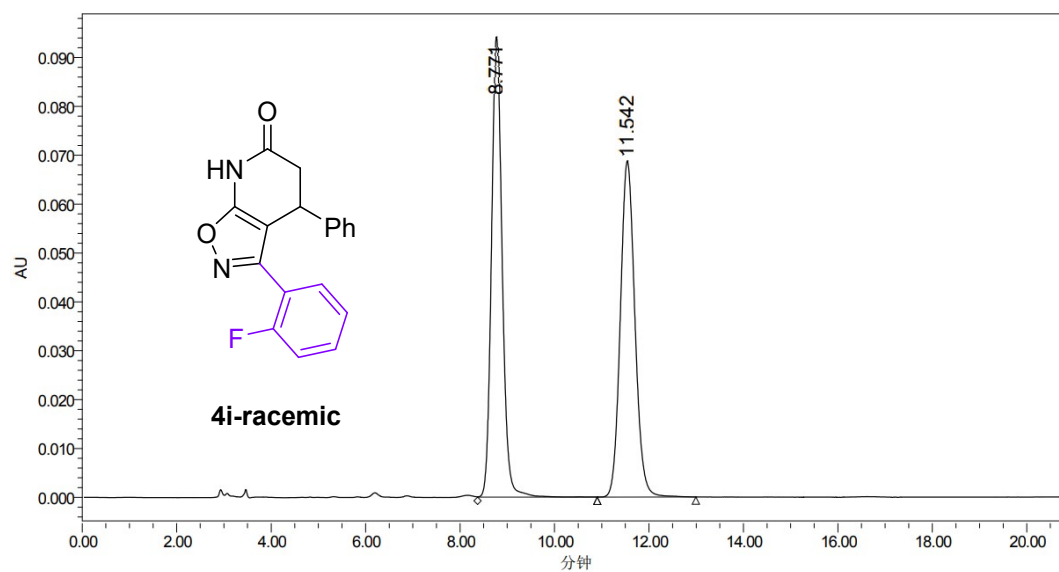

| Peak  | Ret.Time | Area    | Height | Area%  | Height% |
|-------|----------|---------|--------|--------|---------|
| 1     | 8.771    | 1483320 | 94173  | 50.16  | 57.79   |
| 2     | 11.542   | 1473843 | 68770  | 49.84  | 42.21   |
| Total |          | 2957163 | 162943 | 100.00 | 100.00  |

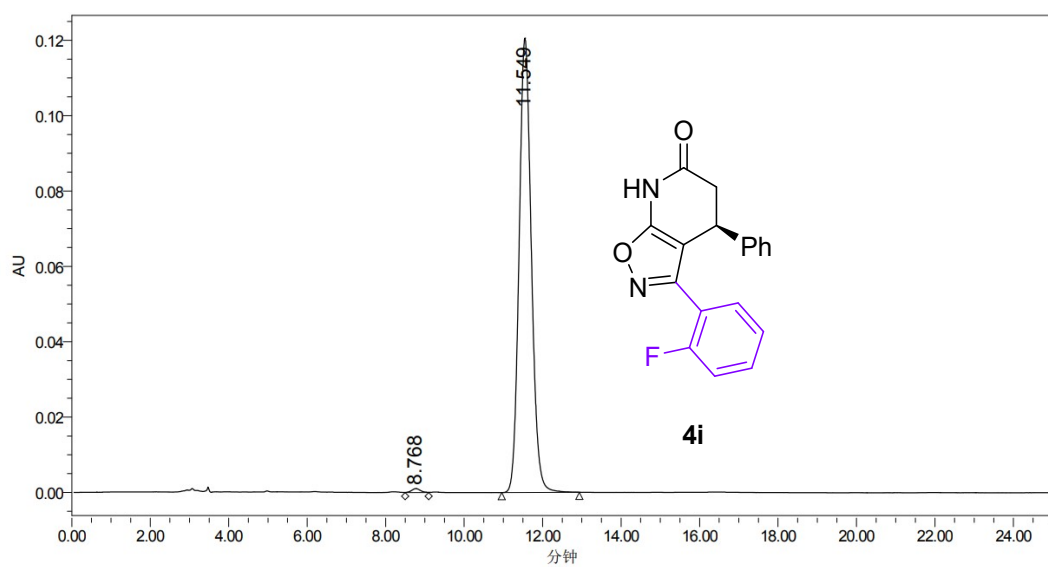

| Peak  | Ret.Time | Area    | Height | Area%  | Height% |
|-------|----------|---------|--------|--------|---------|
| 1     | 8.768    | 16167   | 1028   | 0.62   | 0.85    |
| 2     | 11.549   | 2607796 | 120587 | 99.38  | 99.15   |
| Total |          | 2623963 | 121615 | 100.00 | 100.00  |

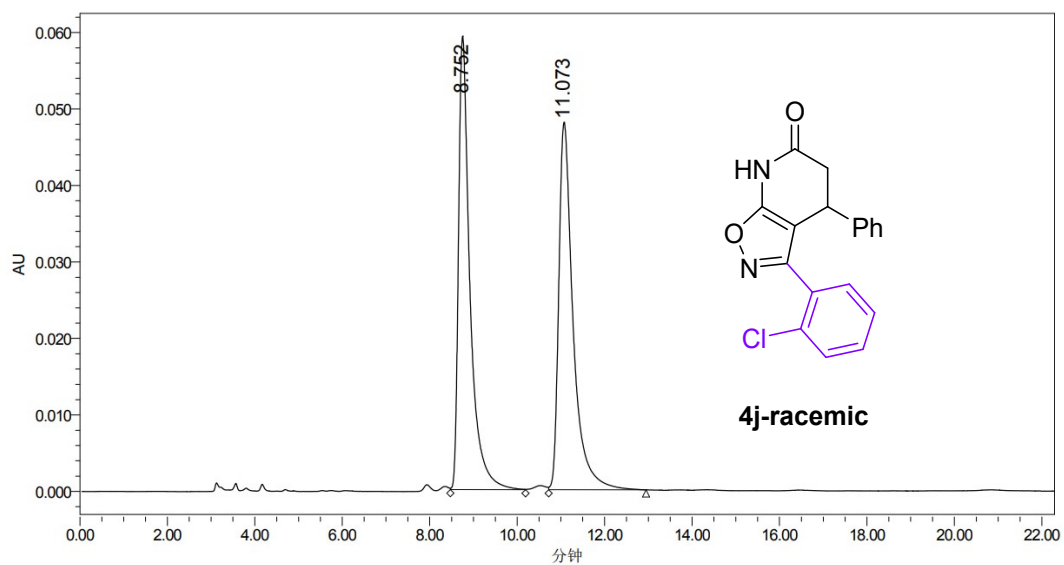

| Peak  | Ret.Time | Area    | Height | Area%  | Height% |
|-------|----------|---------|--------|--------|---------|
| 1     | 8.752    | 1077839 | 59283  | 49.67  | 55.23   |
| 2     | 11.073   | 1092207 | 48057  | 50.33  | 44.77   |
| Total |          | 2170046 | 107340 | 100.00 | 100.00  |

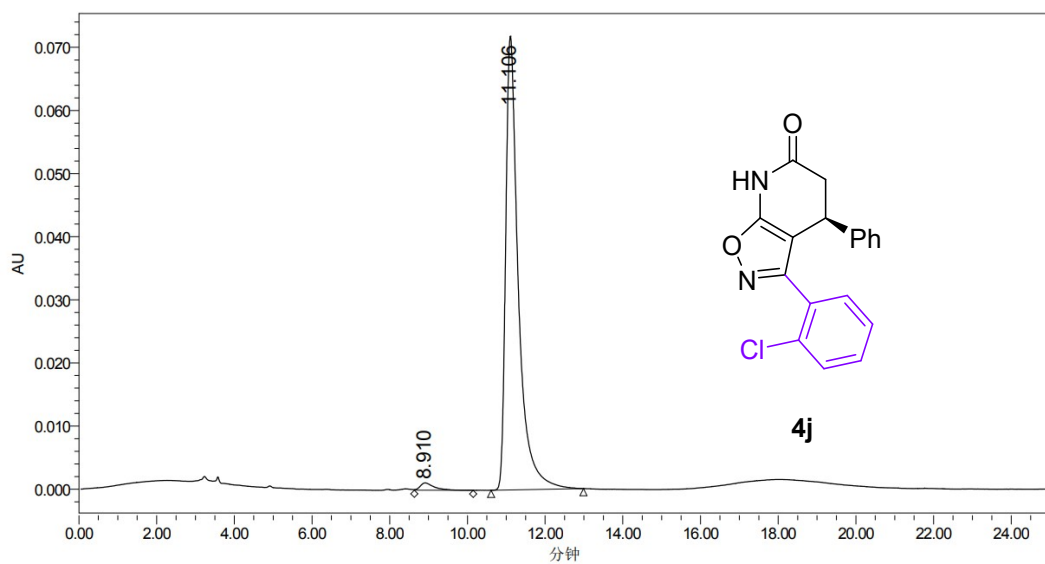

| Peak  | Ret.Time | Area    | Height | Area%  | Height% |
|-------|----------|---------|--------|--------|---------|
| 1     | 8.910    | 29198   | 1159   | 1.77   | 1.59    |
| 2     | 11.106   | 1623560 | 71885  | 98.23  | 98.41   |
| Total |          | 1652758 | 73044  | 100.00 | 100.00  |

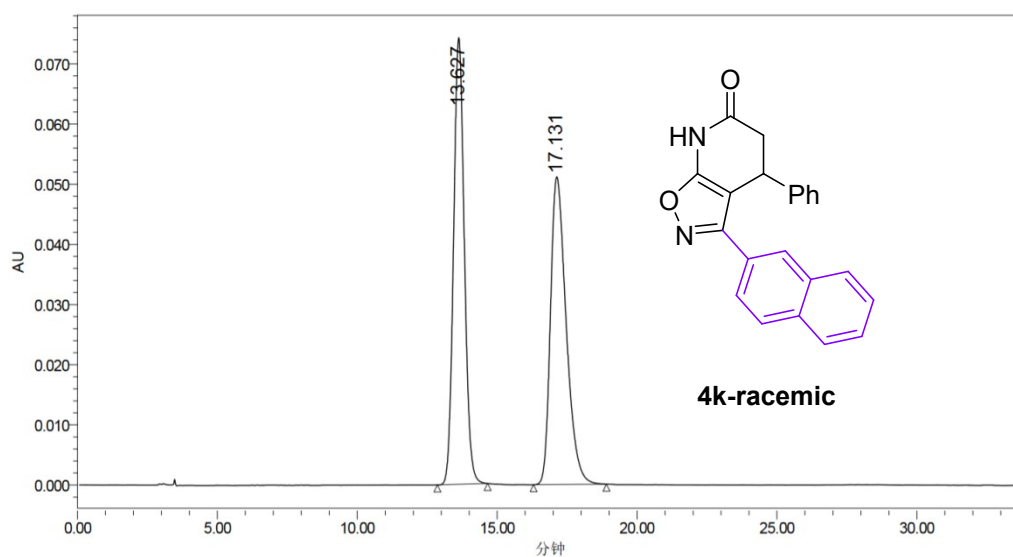

| Peak  | Ret.Time | Area    | Height | Area%  | Height% |
|-------|----------|---------|--------|--------|---------|
| 1     | 13.627   | 1983515 | 74238  | 49.85  | 59.21   |
| 2     | 17.131   | 1995152 | 51136  | 50.15  | 40.79   |
| Total |          | 3978667 | 125374 | 100.00 | 100.00  |

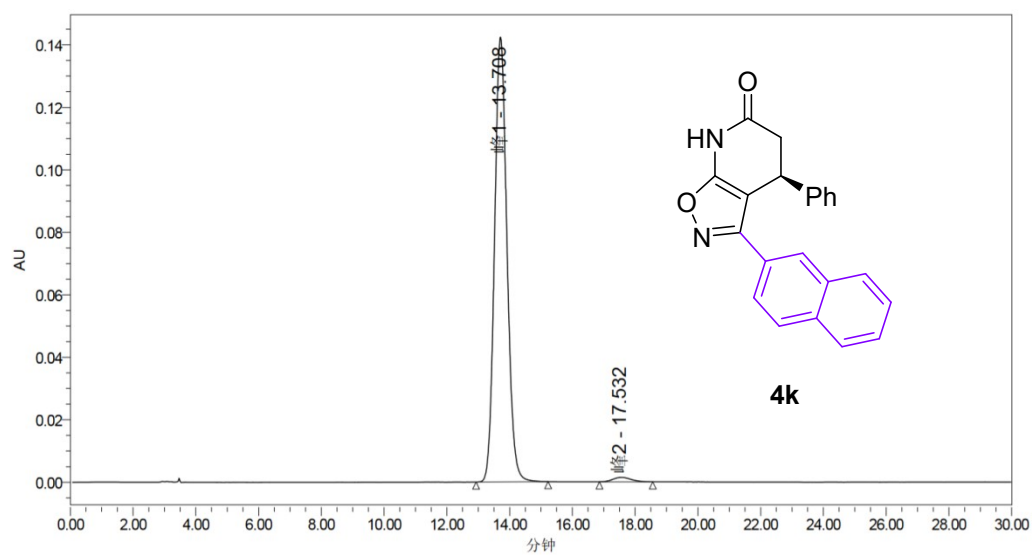

| Peak  | Ret.Time | Area    | Height | Area%  | Height% |
|-------|----------|---------|--------|--------|---------|
| 1     | 13.708   | 3911627 | 142384 | 98.49  | 98.99   |
| 2     | 17.532   | 59866   | 1456   | 1.51   | 1.01    |
| Total |          | 3971493 | 143840 | 100.00 | 100.00  |

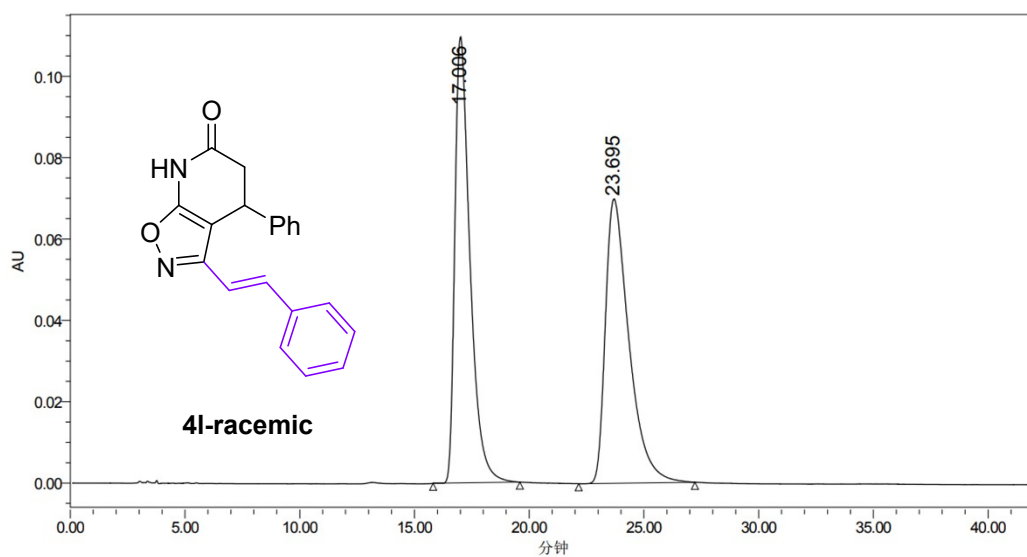

| Peak  | Ret.Time | Area     | Height | Area%  | Height% |
|-------|----------|----------|--------|--------|---------|
| 1     | 17.006   | 5030399  | 109634 | 50.26  | 61.07   |
| 2     | 23.695   | 4978584  | 69877  | 49.74  | 38.93   |
| Total |          | 10008983 | 179511 | 100.00 | 100.00  |

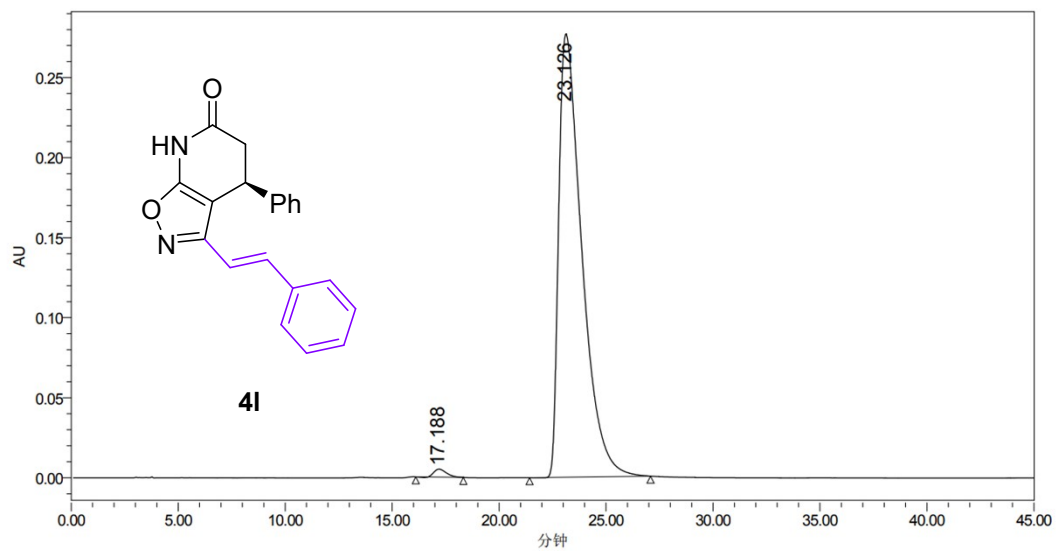

| Peak  | Ret.Time | Area     | Height | Area%  | Height% |
|-------|----------|----------|--------|--------|---------|
| 1     | 17.188   | 214038   | 5012   | 1.02   | 1.78    |
| 2     | 23.126   | 20764558 | 276932 | 98.98  | 98.22   |
| Total |          | 20978596 | 281944 | 100.00 | 100.00  |

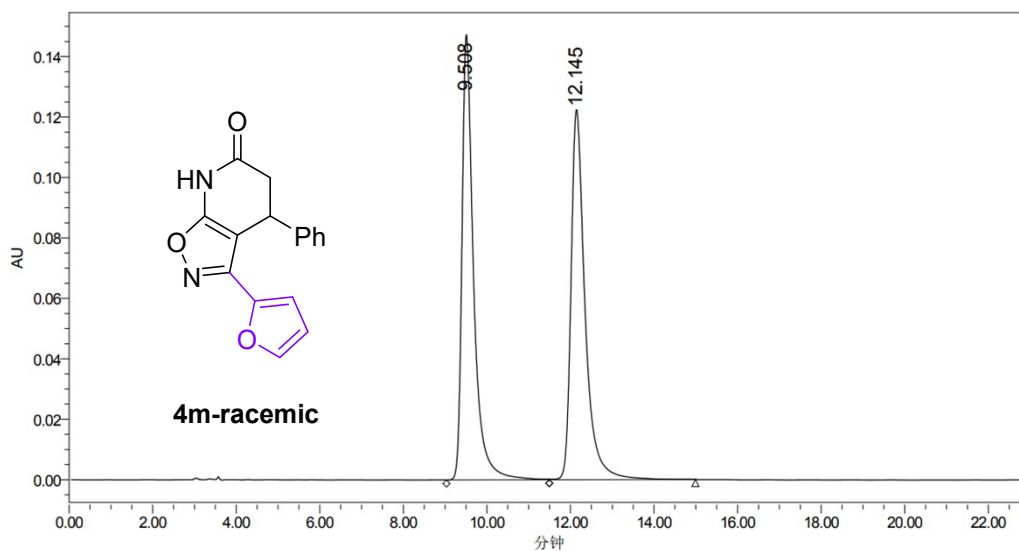

| Peak  | Ret.Time | Area    | Height | Area%  | Height% |
|-------|----------|---------|--------|--------|---------|
| 1     | 9.508    | 2842676 | 147259 | 49.89  | 54.61   |
| 2     | 12.145   | 2855325 | 122417 | 50.11  | 45.39   |
| Total |          | 5698001 | 269676 | 100.00 | 100.00  |

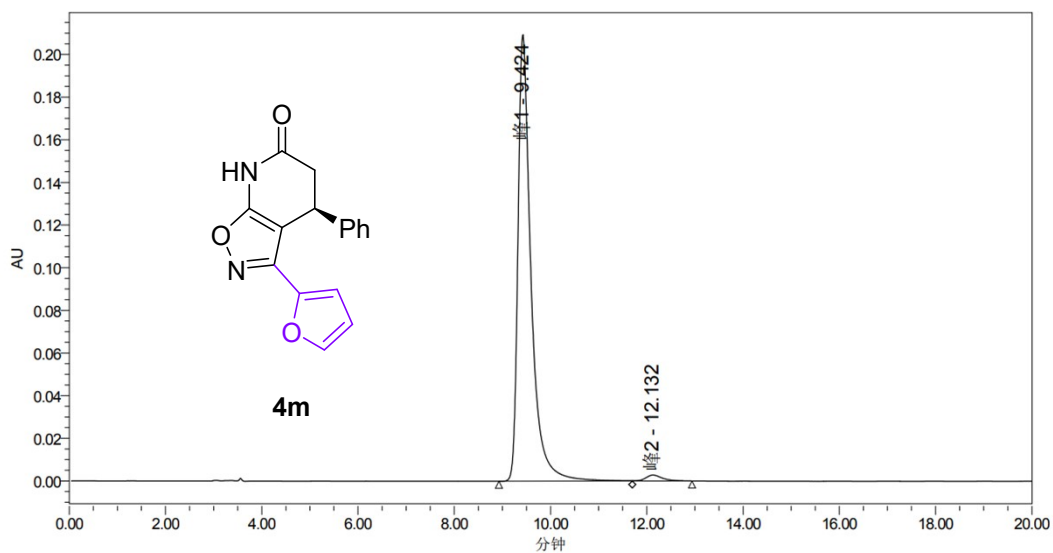

| Peak  | Ret.Time | Area    | Height | Area%  | Height% |
|-------|----------|---------|--------|--------|---------|
| 1     | 9.424    | 3950071 | 209292 | 98.34  | 98.68   |
| 2     | 12.132   | 66573   | 2792   | 1.66   | 1.32    |
| Total |          | 4016644 | 212084 | 100.00 | 100.00  |

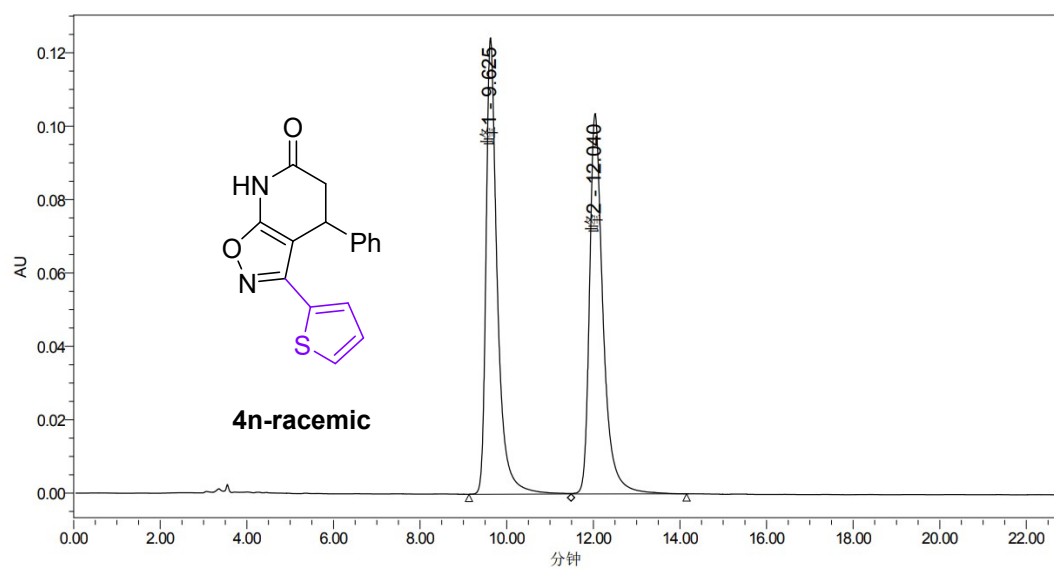

| Peak  | Ret.Time | Area    | Height | Area%  | Height% |
|-------|----------|---------|--------|--------|---------|
| 1     | 9.625    | 2253595 | 124304 | 50.09  | 54.54   |
| 2     | 12.040   | 2245412 | 103620 | 49.91  | 45.46   |
| Total |          | 4499007 | 227924 | 100.00 | 100.00  |

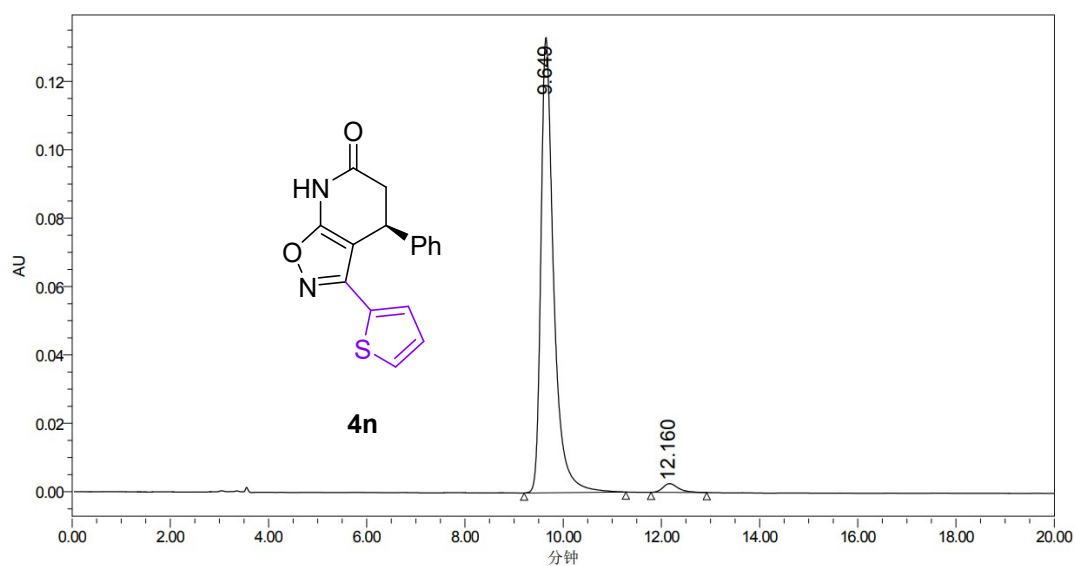

| Peak  | Ret.Time | Area    | Height | Area%  | Height% |
|-------|----------|---------|--------|--------|---------|
| 1     | 9.649    | 2404937 | 133047 | 97.70  | 98.11   |
| 2     | 12.160   | 56497   | 2565   | 2.30   | 1.89    |
| Total |          | 2461434 | 135612 | 100.00 | 100.00  |

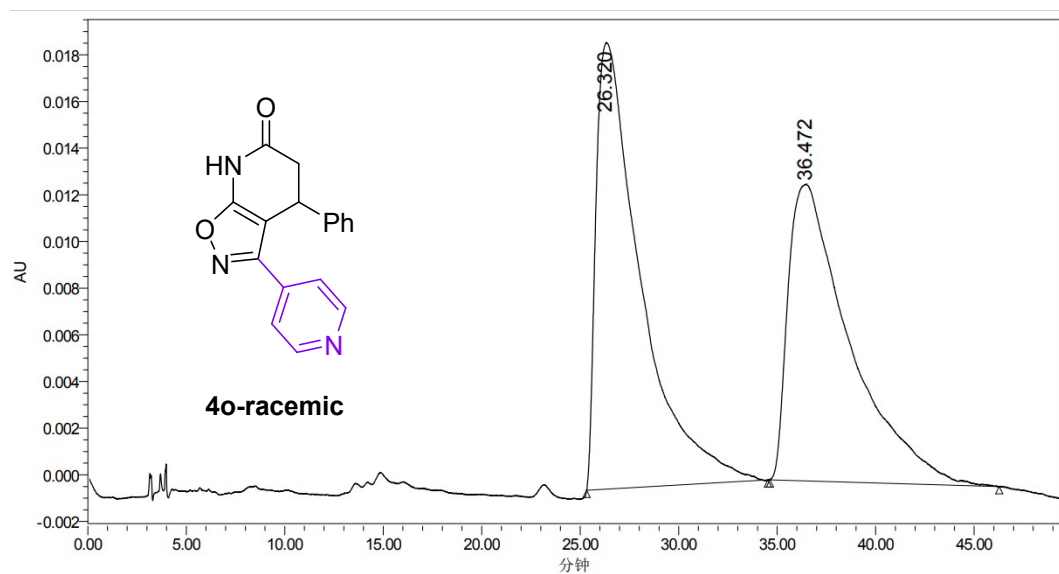

| Peak  | Ret.Time | Area    | Height | Area%  | Height% |
|-------|----------|---------|--------|--------|---------|
| 1     | 26.320   | 3013356 | 19145  | 52.23  | 60.07   |
| 2     | 36.472   | 2755728 | 12725  | 47.77  | 39.93   |
| Total |          | 5769084 | 31870  | 100.00 | 100.00  |

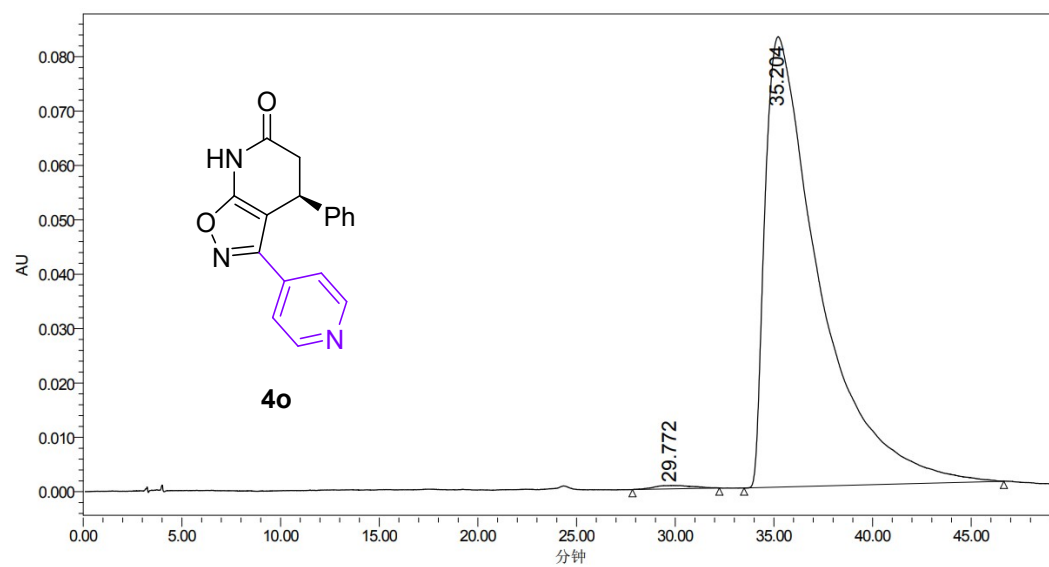

| Peak  | Ret.Time | Area     | Height | Area%  | Height% |
|-------|----------|----------|--------|--------|---------|
| 1     | 29.772   | 83740    | 624    | 0.52   | 0.75    |
| 2     | 35.204   | 15909060 | 82821  | 99.48  | 99.25   |
| Total |          | 15992800 | 83445  | 100.00 | 100.00  |

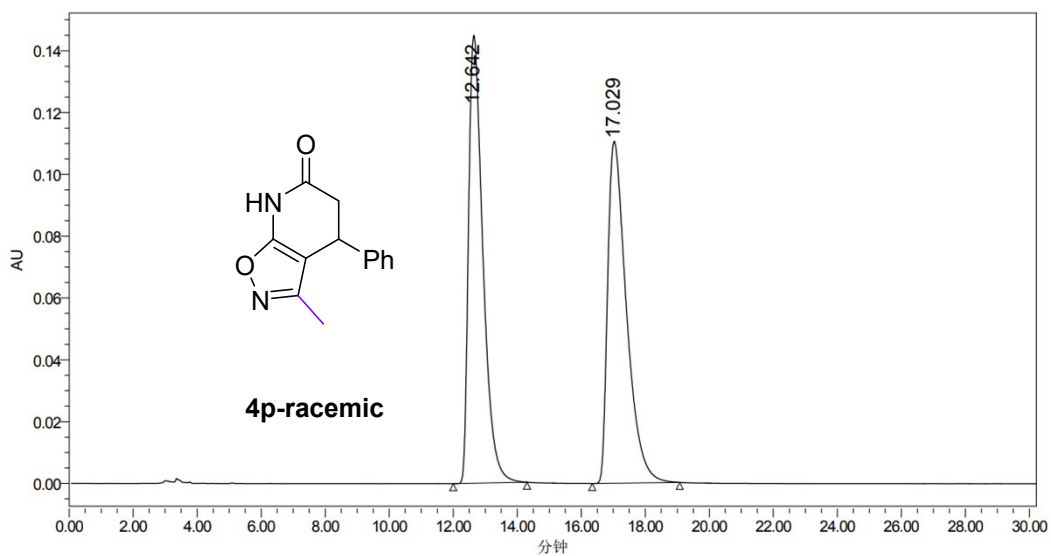

| Peak  | Ret.Time | Area    | Height | Area%  | Height% |
|-------|----------|---------|--------|--------|---------|
| 1     | 12.642   | 4514366 | 144887 | 50.08  | 56.71   |
| 2     | 17.029   | 4499549 | 110615 | 49.92  | 43.29   |
| Total |          | 9013915 | 255502 | 100.00 | 100.00  |

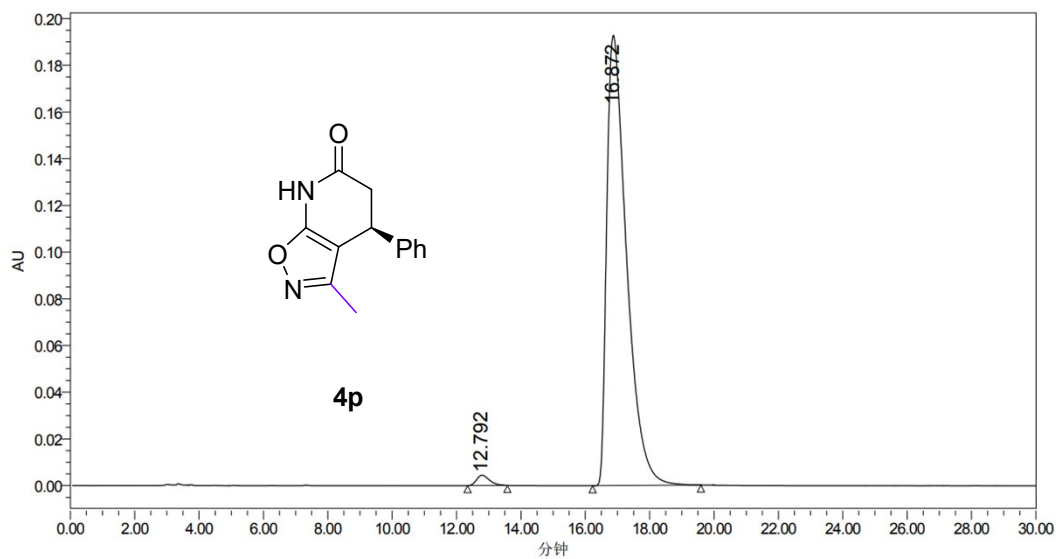

| Peak  | Ret.Time | Area    | Height | Area%  | Height% |
|-------|----------|---------|--------|--------|---------|
| 1     | 12.792   | 122591  | 4428   | 1.47   | 2.25    |
| 2     | 16.872   | 8237442 | 192733 | 98.53  | 97.75   |
| Total |          | 8360033 | 197161 | 100.00 | 100.00  |



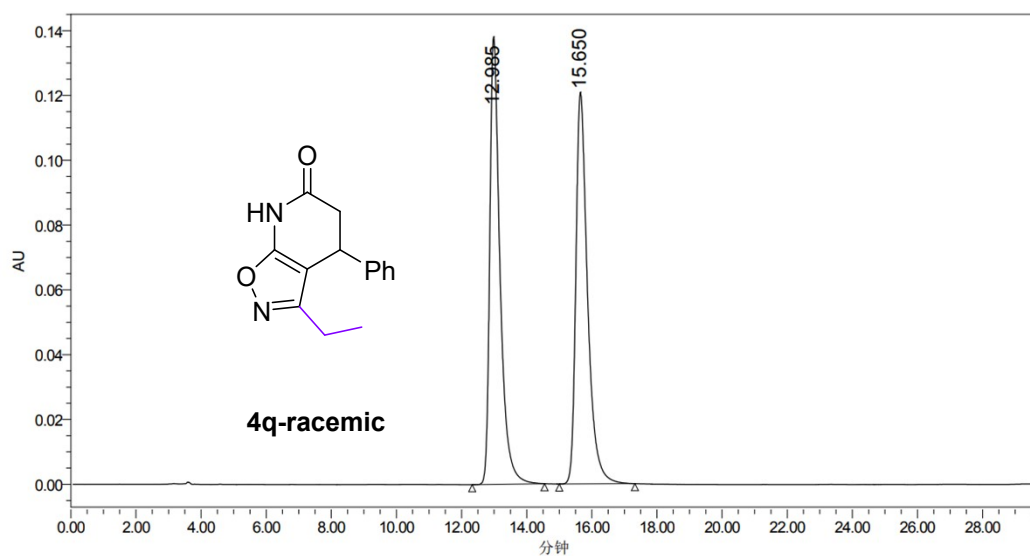

| Peak  | Ret.Time | Area    | Height | Area%  | Height% |
|-------|----------|---------|--------|--------|---------|
| 1     | 12.985   | 3007075 | 138145 | 49.97  | 53.32   |
| 2     | 15.650   | 3010885 | 120917 | 50.03  | 46.68   |
| Total |          | 6017960 | 259062 | 100.00 | 100.00  |

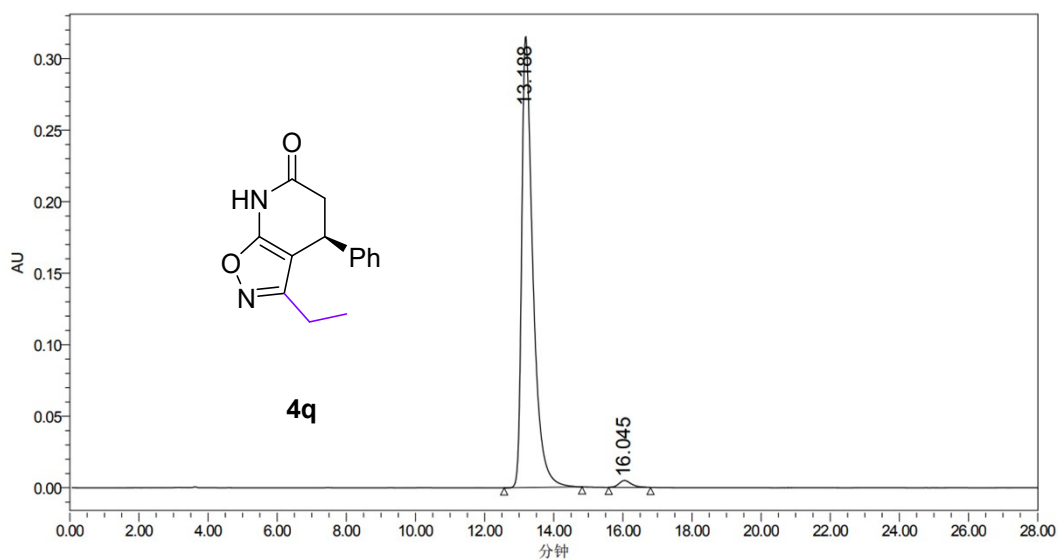

| Peak  | Ret.Time | Area    | Height | Area%  | Height% |
|-------|----------|---------|--------|--------|---------|
| 1     | 13.188   | 7099793 | 315112 | 98.37  | 98.50   |
| 2     | 16.045   | 118004  | 4796   | 1.63   | 1.50    |
| Total |          | 7217797 | 319908 | 100.00 | 100.00  |

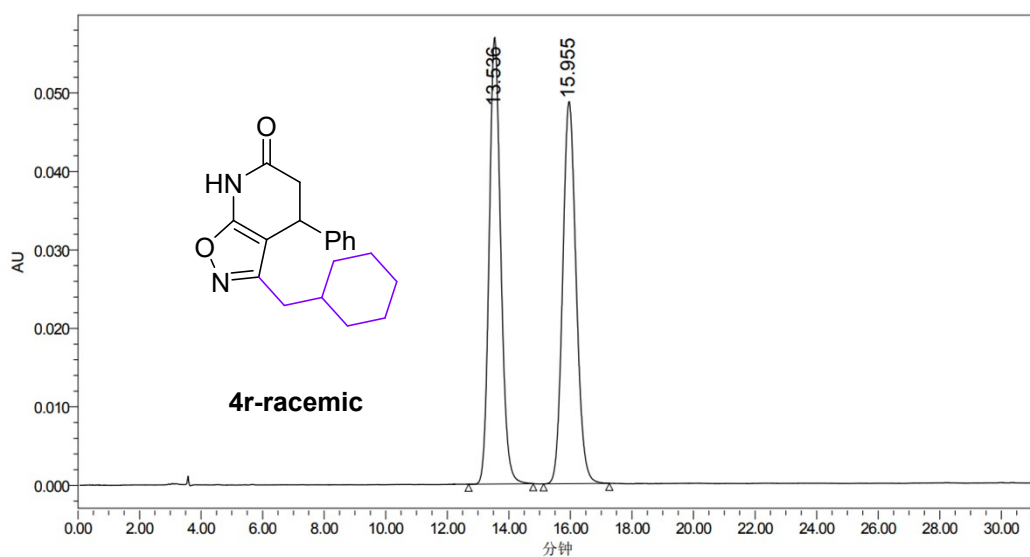

| Peak  | Ret.Time | Area    | Height | Area%  | Height% |
|-------|----------|---------|--------|--------|---------|
| 1     | 13.536   | 1483395 | 56884  | 50.02  | 53.89   |
| 2     | 15.955   | 1482012 | 48671  | 49.98  | 46.11   |
| Total |          | 2965407 | 105555 | 100.00 | 100.00  |

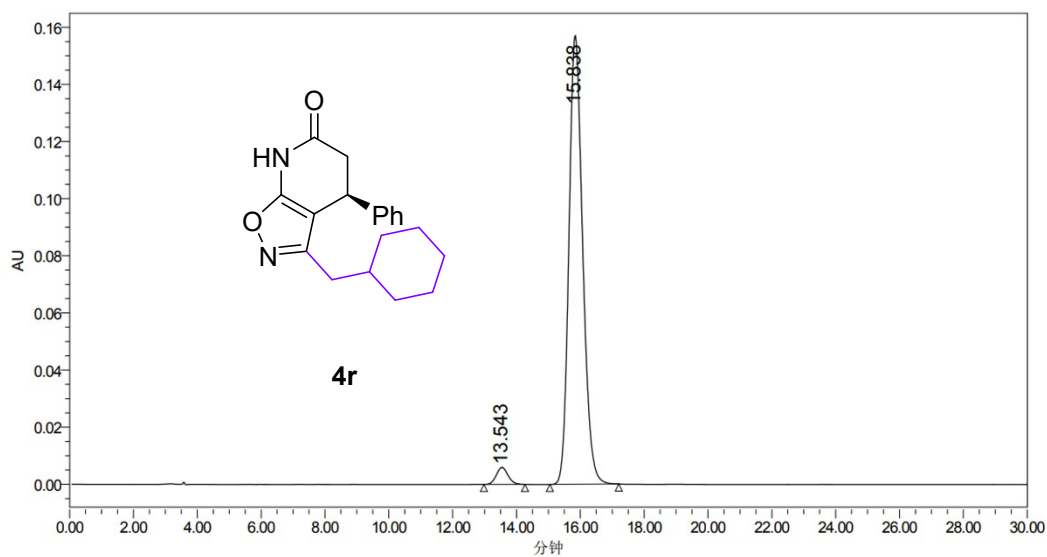

| Peak  | Ret.Time | Area    | Height | Area%  | Height% |
|-------|----------|---------|--------|--------|---------|
| 1     | 13.543   | 151131  | 5937   | 3.12   | 3.64    |
| 2     | 15.838   | 4689822 | 157027 | 96.88  | 96.36   |
| Total |          | 4840953 | 162964 | 100.00 | 100.00  |

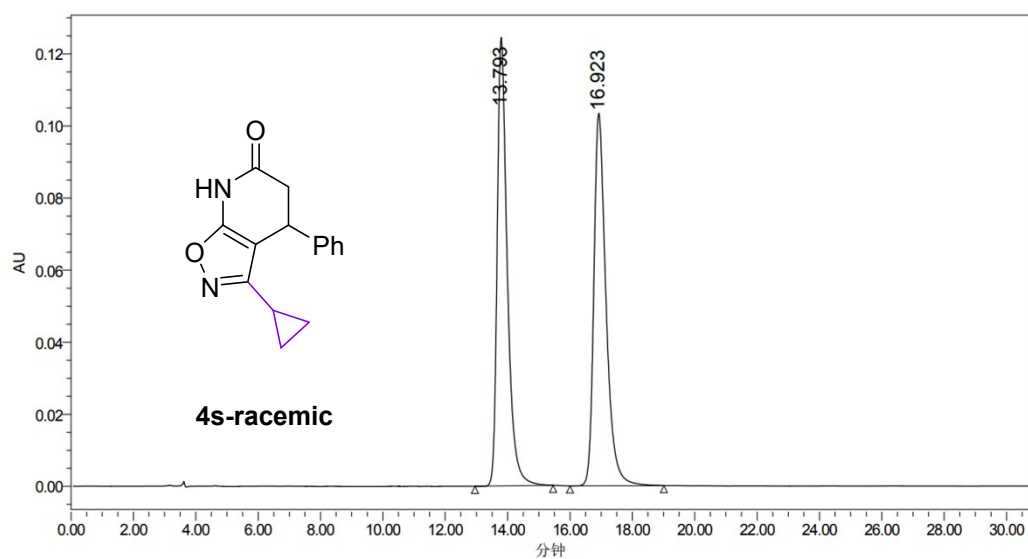

| Peak  | Ret.Time | Area    | Height | Area%  | Height% |
|-------|----------|---------|--------|--------|---------|
| 1     | 13.793   | 2792839 | 124394 | 49.92  | 54.64   |
| 2     | 16.923   | 2801245 | 103270 | 50.08  | 45.36   |
| Total |          | 5594084 | 227664 | 100.00 | 100.00  |

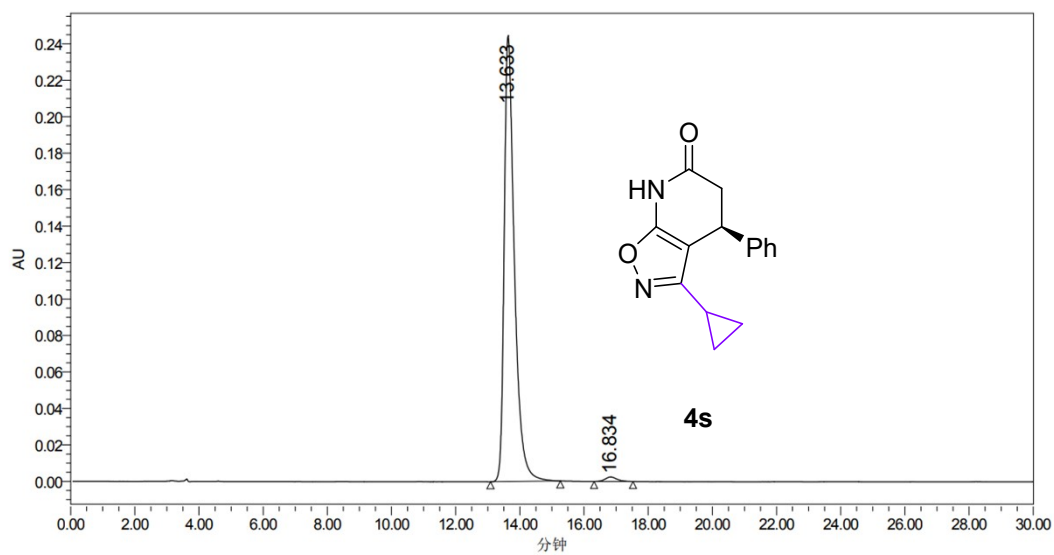

| Peak  | Ret.Time | Area    | Height | Area%  | Height% |
|-------|----------|---------|--------|--------|---------|
| 1     | 13.633   | 5397478 | 244591 | 98.88  | 99.02   |
| 2     | 16.834   | 61025   | 2421   | 1.12   | 0.98    |
| Total |          | 5458503 | 247012 | 100.00 | 100.00  |

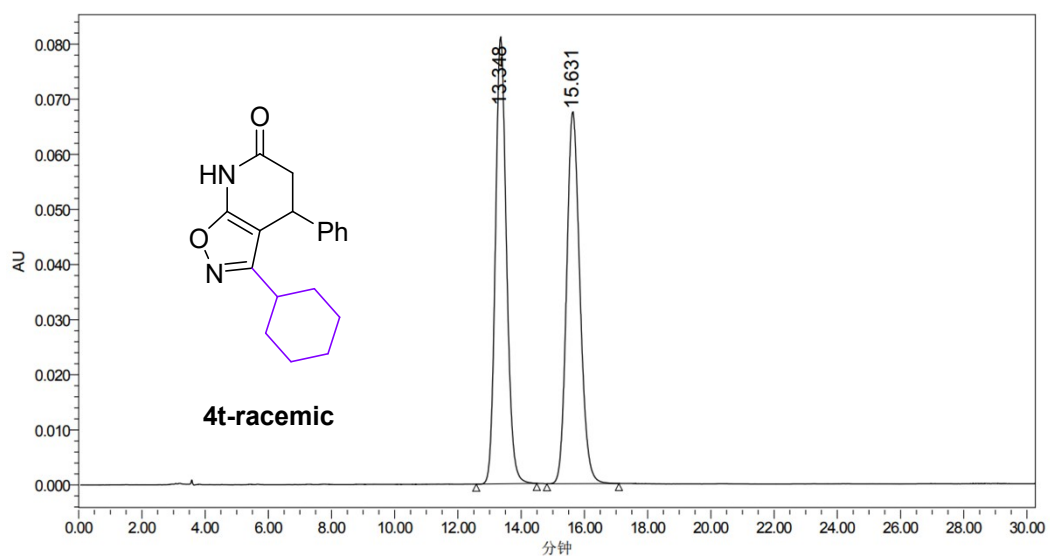

| Peak  | Ret.Time | Area    | Height | Area%  | Height% |
|-------|----------|---------|--------|--------|---------|
| 1     | 13.348   | 1970493 | 81064  | 49.93  | 54.58   |
| 2     | 15.631   | 1975825 | 67449  | 50.07  | 45.42   |
| Total |          | 3946318 | 148513 | 100.00 | 100.00  |

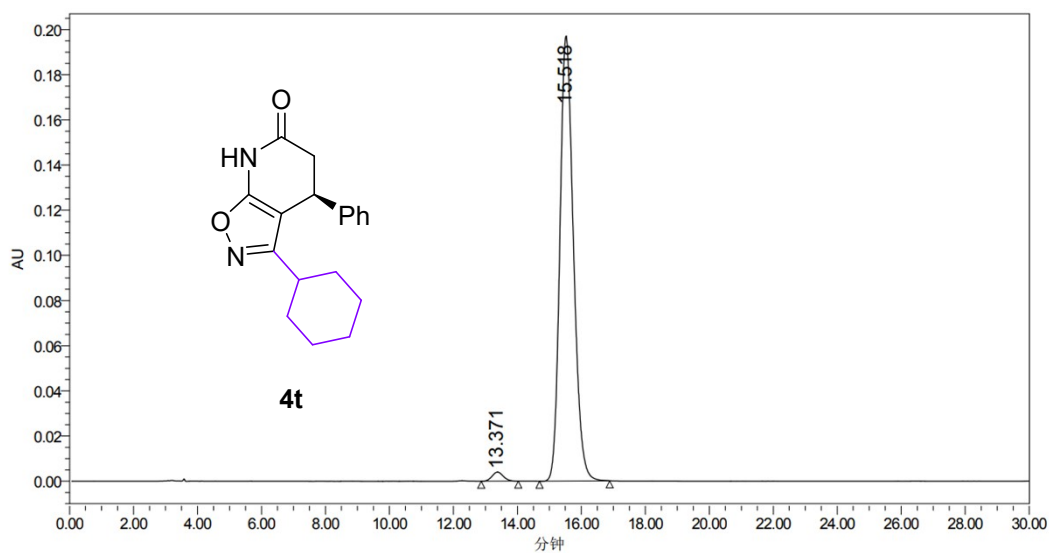

| Peak  | Ret.Time | Area    | Height | Area%  | Height% |
|-------|----------|---------|--------|--------|---------|
| 1     | 13.371   | 97035   | 4020   | 1.65   | 2.00    |
| 2     | 15.518   | 5783237 | 197025 | 98.35  | 98.00   |
| Total |          | 5880272 | 201045 | 100.00 | 100.00  |

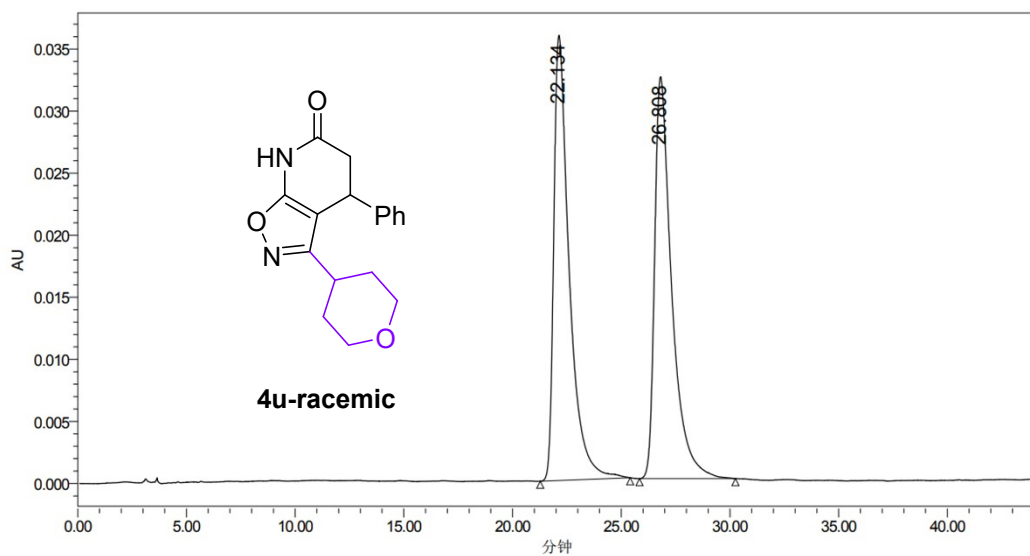

| Peak  | Ret.Time | Area    | Height | Area%  | Height% |
|-------|----------|---------|--------|--------|---------|
| 1     | 22.134   | 1769046 | 35852  | 50.07  | 52.56   |
| 2     | 26.808   | 1764336 | 32361  | 49.93  | 47.44   |
| Total |          | 3533382 | 68213  | 100.00 | 100.00  |

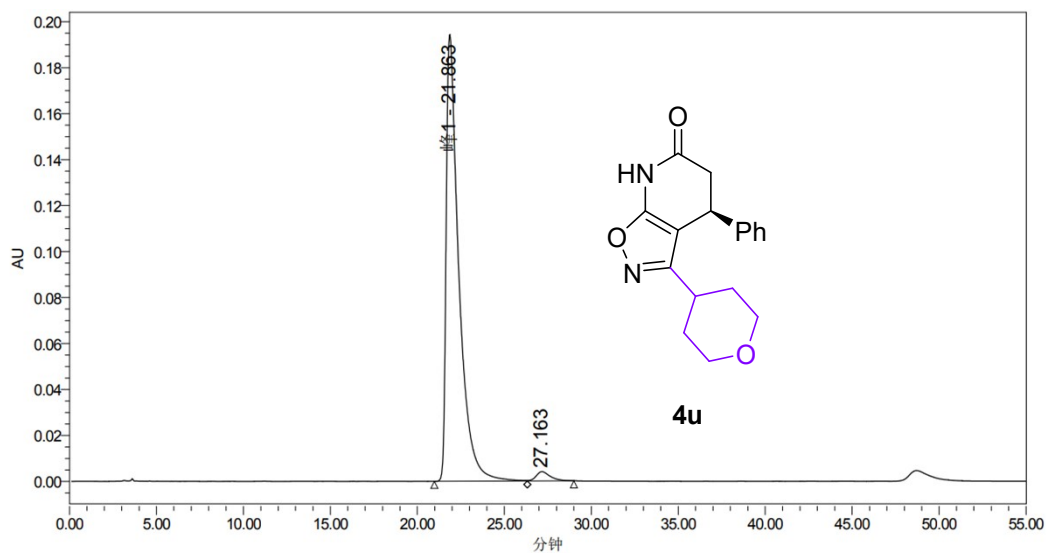

| Peak  | Ret.Time | Area     | Height | Area%  | Height% |
|-------|----------|----------|--------|--------|---------|
| 1     | 21.863   | 9791219  | 194288 | 97.75  | 97.96   |
| 2     | 27.163   | 225755   | 4043   | 2.25   | 2.04    |
| Total |          | 10016974 | 198331 | 100.00 | 100.00  |

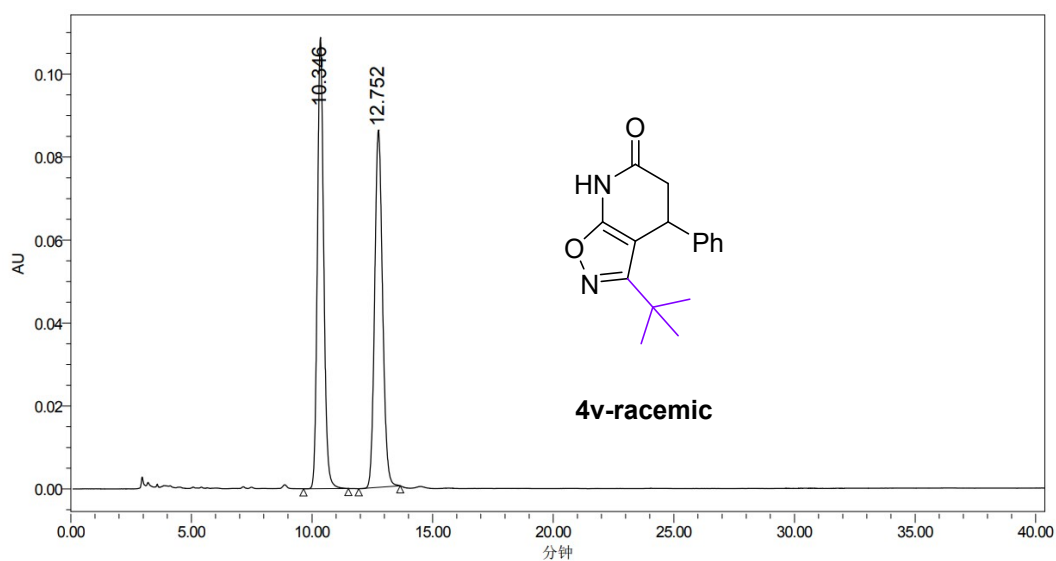

| Peak  | Ret.Time | Area    | Height | Area%  | Height% |
|-------|----------|---------|--------|--------|---------|
| 1     | 10.346   | 1980299 | 108740 | 50.23  | 55.80   |
| 2     | 12.752   | 1961889 | 86121  | 49.77  | 44.20   |
| Total |          | 3942188 | 194861 | 100.00 | 100.00  |

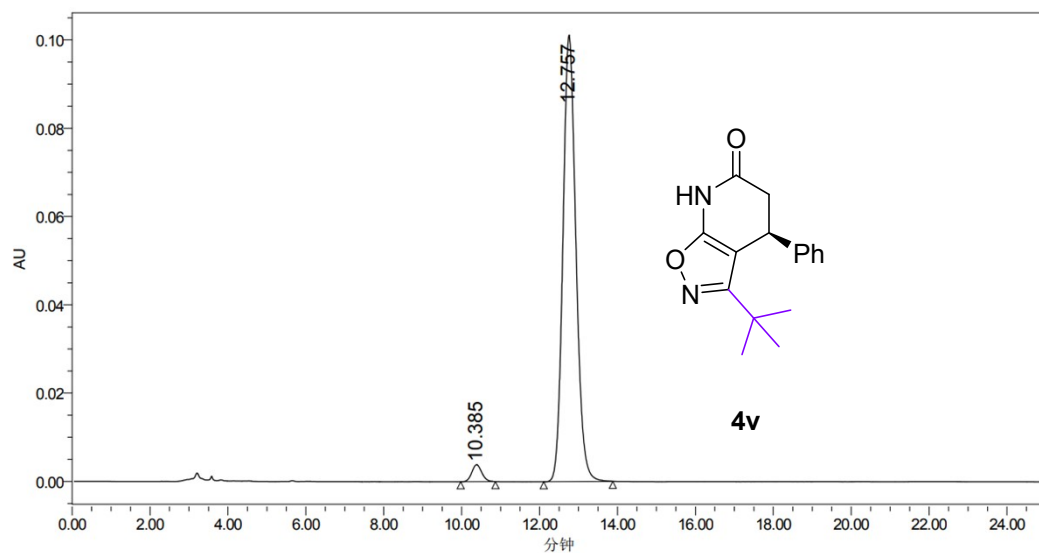

| Peak  | Ret.Time | Area    | Height | Area%  | Height% |
|-------|----------|---------|--------|--------|---------|
| 1     | 10.385   | 68534   | 3841   | 2.84   | 3.66    |
| 2     | 12.757   | 2341194 | 101118 | 97.16  | 96.34   |
| Total |          | 2409728 | 104959 | 100.00 | 100.00  |

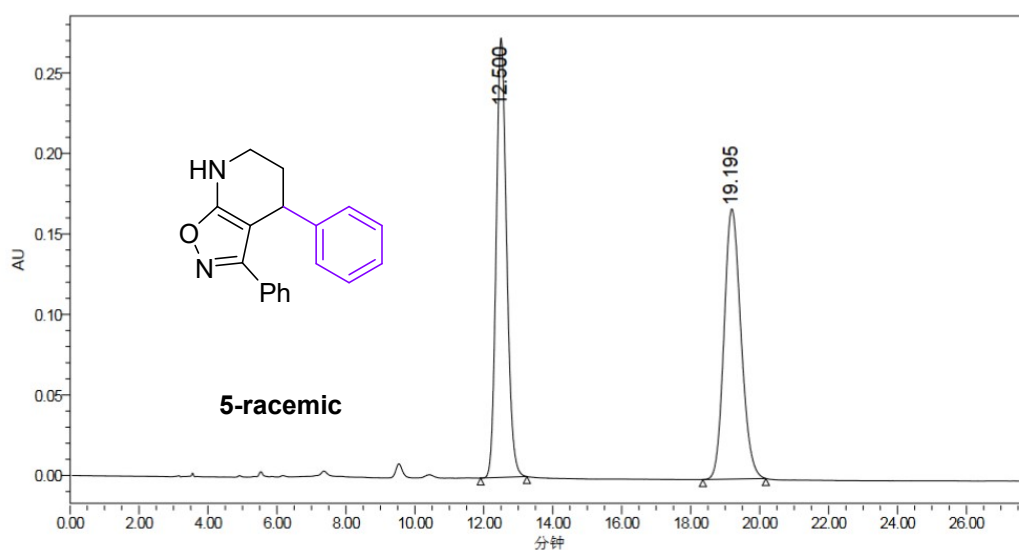

| Peak  | Ret.Time | Area     | Height | Area%  | Height% |
|-------|----------|----------|--------|--------|---------|
| 1     | 12.500   | 5733646  | 272832 | 50.10  | 61.92   |
| 2     | 19.195   | 5710779  | 167765 | 49.90  | 38.08   |
| Total |          | 11444425 | 440597 | 100.00 | 100.00  |

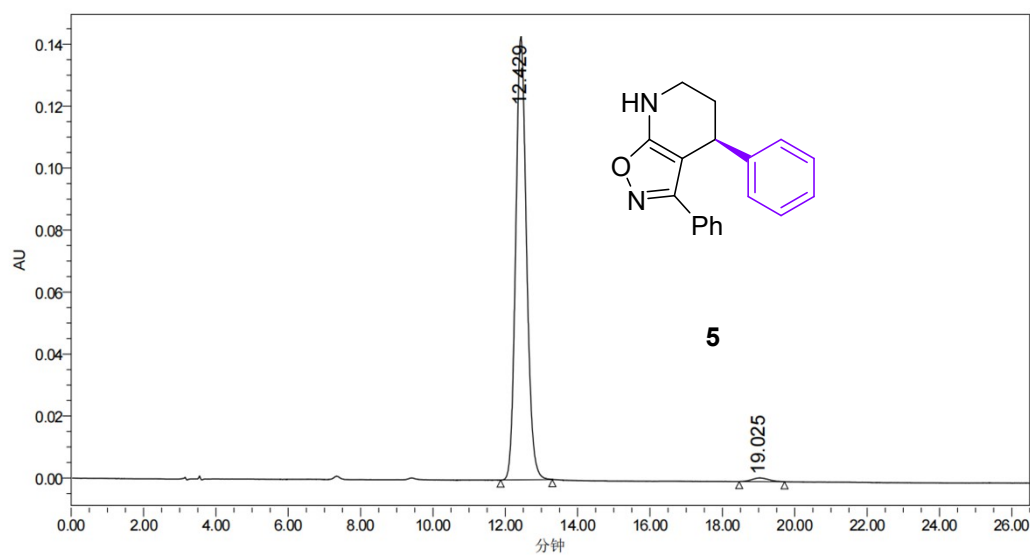

| Peak  | Ret.Time | Area    | Height | Area%  | Height% |
|-------|----------|---------|--------|--------|---------|
| 1     | 12.429   | 2962808 | 142967 | 98.74  | 99.17   |
| 2     | 19.025   | 37682   | 1195   | 1.26   | 0.83    |
| Total |          | 3000490 | 144162 | 100.00 | 100.00  |

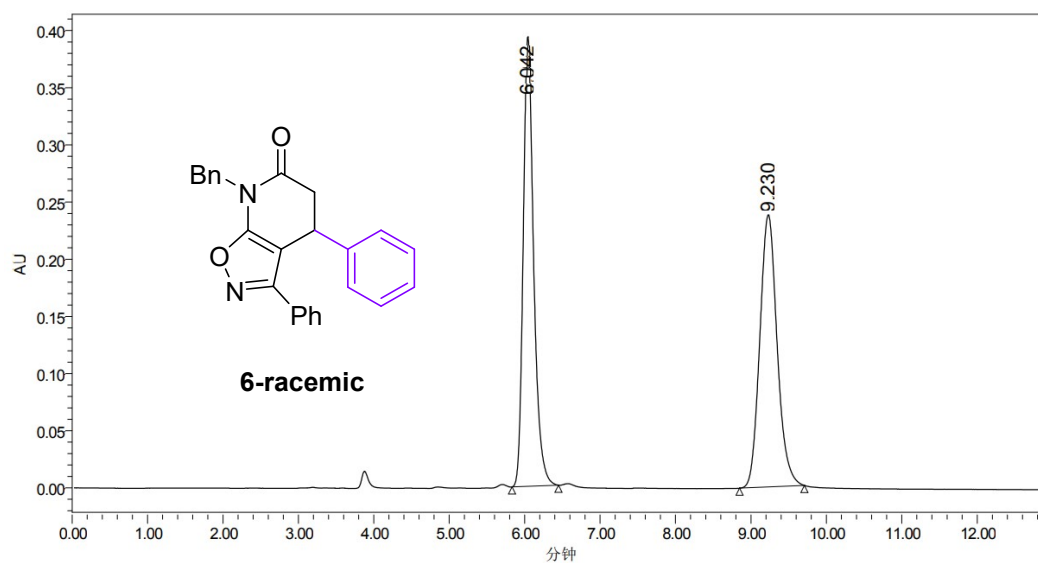

| Peak  | Ret.Time | Area    | Height | Area%  | Height% |
|-------|----------|---------|--------|--------|---------|
| 1     | 6.042    | 3790163 | 393061 | 49.98  | 62.29   |
| 2     | 9.230    | 3793407 | 237914 | 50.02  | 37.71   |
| Total |          | 7583570 | 630975 | 100.00 | 100.00  |

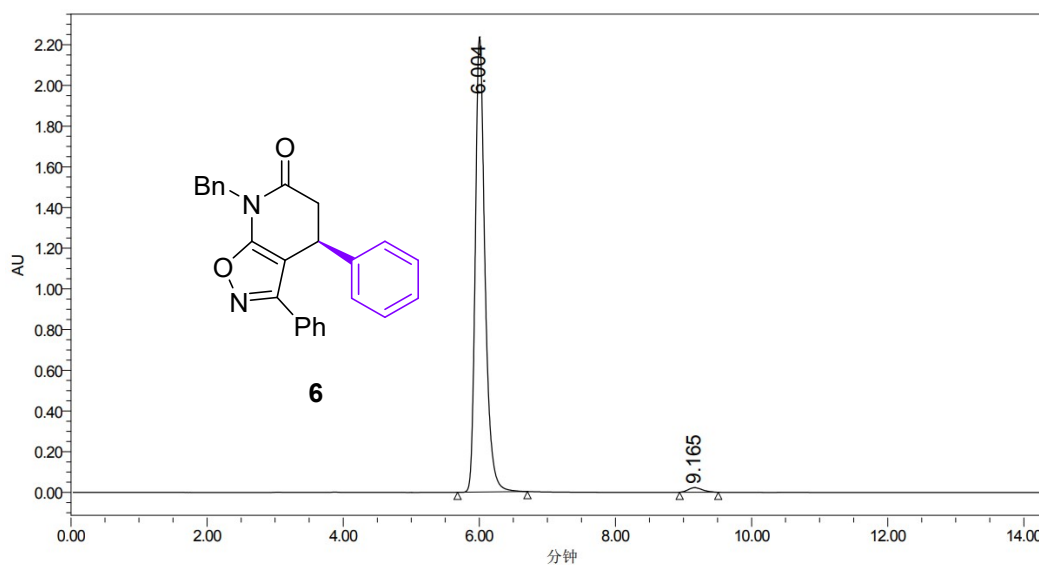

| Peak  | Ret.Time | Area     | Height  | Area%  | Height% |
|-------|----------|----------|---------|--------|---------|
| 1     | 6.004    | 22141755 | 2236748 | 98.55  | 99.01   |
| 2     | 9.165    | 324864   | 22305   | 1.45   | 0.99    |
| Total |          | 22466619 | 2259053 | 100.00 | 100.00  |



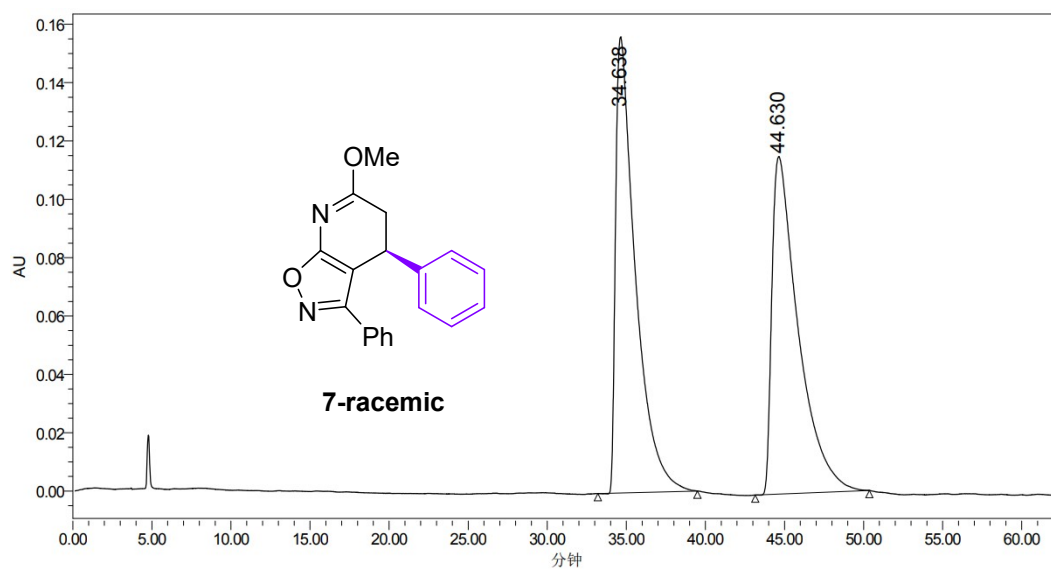

| Peak  | Ret.Time | Area     | Height | Area%  | Height% |
|-------|----------|----------|--------|--------|---------|
| 1     | 34.638   | 13598748 | 156299 | 50.39  | 57.46   |
| 2     | 44.630   | 13386996 | 115720 | 49.61  | 42.54   |
| Total |          | 26985744 | 272019 | 100.00 | 100.00  |

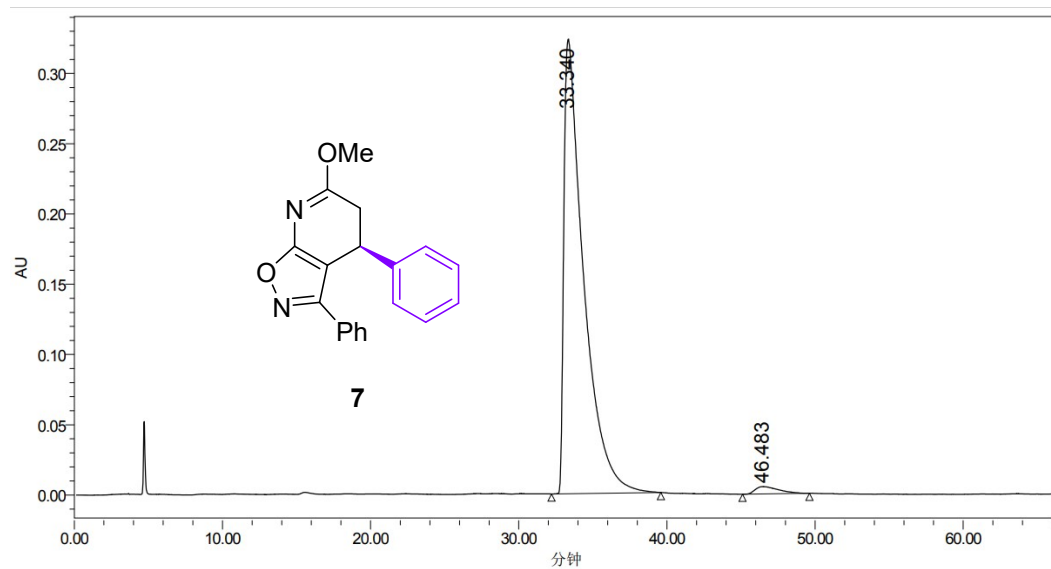

| Peak  | Ret.Time | Area     | Height | Area%  | Height% |
|-------|----------|----------|--------|--------|---------|
| 1     | 33.340   | 29832632 | 323352 | 98.15  | 98.41   |
| 2     | 46.483   | 561990   | 5224   | 1.85   | 1.59    |
| Total |          | 30394622 | 328576 | 100.00 | 100.00  |
